# Supplementary material for: A novel DNAJ protein, TCAIM, drives proteolysis of α-ketoglutarate dehydrogenase and regulates mitochondrial metabolism.
Source: Research Square preprint supplement (doi:10.21203/rs.3.rs-1236697/v1), 2022-01-21
Supplement: Supplementary file 1 [file 59247453a92380fc4b50cb31.xlsx]

## Sheet: raw data
sample ID	NEG_A1_2.mzdata	NEG_A1_3.mzdata	NEG_A1_4.mzdata	NEG_A1_5.mzdata	NEG_A1_6.mzdata	NEG_A1_7.mzdata	NEG_A1_8.mzdata	NEG_A1_11.mzdata	NEG_A1_12.mzdata	NEG_A1_13.mzdata	NEG_A1_14.mzdata	NEG_A1_15.mzdata
lable	KO	KO	KO	KO	KO	KO	KO	WT	WT	WT	WT	WT
26-O-beta-D-glucopyranosyl-22-methoxy-3beta,26-dihydroxy-25(R)-furost-5-ene-3-O-alpha-L-rhamnopyranosyl-(1-4)-alpha-L-rhamnopyranosyl-(1-4)-[alpha-L-rhamnopyranosyl-(1-2)]-beta-D-glucopyranoside	0.0720287	0.0606828	0.0564528	0.0594981	0.0721239	0.0699026	0.0726758	0.0599697	0.063188	0.0425468	0.0690219	0.0972421
PC(16:0/9:0(CHO))	0.00494748	0.0143095	0.0064681	0.00579195	0.0117369	0.0100153	0.00990632	0.00486039	0.00574652	0.00963034	0.0196678	0.0104367
?D-?Xylonic acid	0.00572364	0.00538801	0.00250876	0.00310602	0.00127534	0	0.0100664	0.00339979	0.00117424	0.00103977	0.0033998	0.000494579
?Protocatechuic acid 3-O-sulfate	0.00737747	0.00899271	0.00760472	0.00963044	0.00637508	0.00591088	0.00539338	0.00623959	0.00585016	0.00526081	0.00475969	0.00622544
(-)-alpha-Narcotine	0.00327107	0.00312374	0.00258368	0.00334678	0.00258303	0.00244949	0.00287337	0.00228048	0.00256074	0.00301941	0.00389087	0.00313314
(-)-Aspidospermine	0.0490281	0.0448518	0.0662356	0.00858183	0.0161687	0.0537822	0.0850874	0.112834	0.0295849	0.0241459	0.0142763	0.0178479
(-)-Dioxibrassinin	0.0077545	0.00800506	0.0081115	0.00696955	0.00808258	0.00703187	0.00685656	0.0103007	0.00955198	0.00938221	0.00874758	0.0094412
(-)-erythro-Anethole glycol 1-glucoside	0.556472	0.0109146	0.0169425	0.507182	0.0325167	0.375227	0.00988764	0.656375	0.0119495	0.148743	0.763374	0.0767999
(+)-7-epi-Syringaresinol 4'-glucoside	0.0333891	0.0238361	0.0318128	0.0359043	0.0330113	0.0436913	0.0465674	0.0603753	0.0371404	0.0688884	0.0514875	0.0598917
(+)-Chebulic acid	0.0394863	0.0239637	0.0321982	0.0274996	0.0192663	0.0219956	0.0377568	0.0185778	0.0211733	0.014379	0.0200148	0.0173378
(+-)-(Z)-2-(5-Tetradecenyl)cyclobutanone	0	0	0	0.000192537	0.00124171	0.000213862	0.000286603	0.000530874	0	0.00010582	0.000812084	0.000295452
(1S,16R)-5,7,11-trihydroxy-3-[3-hydroxy-1-(2-methyl-1,3-thiazol-4-yl)prop-1-en-2-yl]-8,8,10,12,16-pentamethyl-17-oxa-4-azabicyclo[14.1.0]heptadec-4-en-9-one	0.0147494	0.018122	0.0101222	0.0113344	0.00458631	0.00179446	0.00249663	0.0120596	0.0118618	0.0105054	0.00652191	0.00643828
(1xi,3S)-1,2,3,4-Tetrahydro-1-methyl-beta-carboline-1,3-dicarboxylic acid	0.00763949	0.00709122	0.00665768	0.0061126	0.00542879	0.0132317	0.0216722	0.00618039	0.00346147	0.00282449	0.0217542	0.00350565
(2,4,6-Trioxo-1,3,5-triazine-1,3,5(2H,4H,6H)-triyl)tris(2,1-ethanediyl) tris(9-octadecenoate)	0.00708868	0.00673545	0.00664337	0.00703979	0.00683407	0.00654122	0.00612596	0.00608318	0.00762654	0.00616011	0.00621737	0.00659158
(20R)-Ginsenoside Rh2	0.0186979	0.0175584	0.0165612	0.0186516	0.0174396	0.0163157	0.0177469	0.018017	0.0170091	0.016224	0.0174261	0.0159937
(23S)-23,25-dihdroxy-24-oxovitamine D3 23-(beta-glucuronide)	0	0.00112113	0.000670918	0.0012636	0.00300752	0.00153756	0.00136581	0.00106909	0.000918393	0.00105911	0.00187243	0.00227619
(24E)-3alpha,15alpha-Diacetoxy-23-oxo-7,9(11),24-lanostatrien-26-oic acid	0.0455054	0.0452619	0.0407345	0.0434478	0.0407596	0.0464502	0.0381548	0.0435936	0.0514405	0.0399674	0.0462846	0.0530938
(24E)-3alpha-Acetoxy-15alpha-hydroxy-23-oxo-7,9(11),24-lanostatrien-26-oic acid	0.0139465	0.0126204	0.0111165	0.0119796	0.0118045	0.0119406	0.00974184	0.012623	0.00849254	0.00728236	0.0108178	0.0113027
(24E)-3beta,15alpha,22S-Triacetoxylanosta-7,9(11),24-trien-26-oic acid	0.0079156	0.00849099	0.00702445	0.00873059	0.0149795	0.0279227	0.0119849	0.0184157	0.0155958	0.0294866	0.0106218	0.00951373
(24R)-5b,8b-Epidioxyergosta-6,22E-dien-3b-ol 3-glucoside	0.00128931	0.00139194	0.00107976	0.00111008	0.00177891	0.00411482	0.00184304	0.00291314	0.00253288	0.00496736	0.00200247	0.00136604
(25R)-1beta,3alpha,7alpha-trihydroxy-5beta-cholestan-27-oyl taurine	0.0578808	0.0253556	0.442243	0.396163	0.0122778	0.0131876	0.204298	0.388955	0.0146755	0.0537082	0.0250819	0.0144899
(25R)-3alpha,7alpha-dihydroxy-5beta-cholestan-27-oyl taurine	8.54092	22.0071	21.7027	22.4327	21.6495	22.1934	22.1769	7.64296	26.9205	30.3147	28.7975	30.822
(2E)-2-[(5-tert-Butyl-2-methoxyphenyl)methylidene]-N-octadecylhydrazine-1-carbothioamide	0.00631032	0.0053834	0.0131093	0.00886376	0.00579036	0.00447009	0.0064894	0.0109168	0.00906462	0.00441454	0.00531617	0.0082833
(2E)-3-phenyl-1-[2,4,6-trihydroxy-3-(4-hydroxy-3-methylbut-2-en-1-yl)-5-(3-methylbut-2-en-1-yl)phenyl]prop-2-en-1-one	0.0185899	0.0167385	0.010987	0.015121	0.0216656	0.0138767	0.0177218	0.0282566	0.0142459	0.0378629	0.0124924	0.0213467
(2E)-3-phenyl-1-[2,4,6-trihydroxy-3,5-bis(3-methylbut-2-en-1-yl)phenyl]prop-2-en-1-one	0	0.000882112	0.00283675	0.00316703	0.00313785	0.000572156	0.00283858	0.00501932	0.00153191	0.00292974	0.00315456	0.0039872
(2R)-2-[(8-Carboxyoctanoyl)oxy]-3-(hexadecyloxy)propyl 2-(trimethylazaniumyl)ethyl phosphate	0.000395111	0.00421324	0.000912886	0.00572672	0.00634771	0.00413578	0.00467625	0.00624808	0.00649156	0.0057903	0.00603956	0.00642375
(2R)-3-(Hexadecanoyloxy)-2-[(5-oxopentanoyl)oxy]propyl 2-(trimethylazaniumyl)ethyl phosphate	0.402777	0.413342	0.299882	0.368561	0.304425	0.267151	0.360095	0.388972	0.407282	0.257095	0.254196	0.365182
(2R,3R,4S)-N-(2-((1,1')-Biphen-4-yl-amino)-4-((N-((benzyloxy)carbonyl)valyl)amino)-3-hydroxy-5-phenylpentanoyl)valine benzylamide	0.0645179	0.0506265	0.0650965	0.0471412	0.0573135	0.0565744	0.0576091	0.0545371	0.0546599	0.0537165	0.0579421	0.0587721
(2R,3R,4S)-N-(2-((4-Methoxybenzylamino)-4-((N-((benzyloxy)carbonyl)valyl)amino)-3-hydroxy-5-phenylpentanoyl)valine(2-benzimidazolyl)methylamide	0.0107388	0.00352984	0.00648883	0.00207336	0.00342061	0.00360134	0.00330978	0.00811822	0.00918356	0.00724389	0.00752842	0.0091642
(2S)-1-[(2S,3S)-3-Hexyl-4-oxooxetan-2-yl]tridecan-2-yl N-formyl-L-methioninate	0.000349184	0.0036919	0.00402707	0.00667942	0.00516845	0.00535111	0.00605487	0.00614741	0.0067003	0.00826804	0.00907764	0.00954113
(2S)-2-amino-3-(4-hydroxy-3-methoxyphenyl)-2-methylpropanoic acid	0.0202191	0.0199486	0.0223886	0.0215058	0.0185725	0.0184923	0.0205453	0.01851	0.0171035	0.0200924	0.015713	0.019845
(2S,2'S)-2,2'-[Propane-1,3-diylbis(dodecanoylazanediyl)]dipropanoic acid (non-preferred name)	0.0543221	0.0520226	0.0534632	0.0291422	0.034551	0.0484924	0.0516468	0.0509624	0.0405192	0.055729	0.0334817	0.0512435
(2S,3R)-3-Hydroxy-2-methylbutanoic acid	0.026466	0.027062	0.0258293	0.0263302	0.0283652	0.02643	0.0257149	0.0284594	0.0287764	0.0281959	0.0274355	0.0279416
(3a,5b)-24-oxo-24-[(2-sulfoethyl)amino]cholan-3-yl-b-D-Glucopyranosiduronic acid	0.00625273	0.00783976	0.0089983	0.0094635	0.00850439	0.00767791	0.00842298	0.0109691	0.0105206	0.00853952	0.00931608	0.0105148
(3aR,8aR)-4,4,8,8-Tetrakis(3,5-di-tert-butylphenyl)-2,2-diethyl-6-phenyltetrahydro-2H,6H-[1,3]dioxolo[4,5-e][1,3,2]dioxaphosphepine	0.0583645	0.0748188	0.0869579	0.0872148	0.0736466	0.0682719	0.0735753	0.0967526	0.0925999	0.0768767	0.0804142	0.0896176
(3b,16a,21b,22a)-12-Oleanene-3,16,21,23,28-pentol-22-angeloyloxy-23-al	0.000167073	0.000245519	0.00448123	0.00537843	0.00584453	0.00393259	0.00107491	0.00611772	0.00568441	0.00083099	0.00115424	0.00441361
(3b,20R,22R)-3,20,27-Trihydroxy-1-oxowitha-5,24-dienolide 3-glucoside	0.133418	0.129312	0.14407	0.182498	0.11879	0.123169	0.133788	0.13654	0.137733	0.117773	0.141518	0.140783
(3b,22a)-12-Oleanene-3,22,24,29-tetrol 3-[arabinosyl-(1->3)-arabinoside]	0.00686111	0.00497172	0.001153	0.00294132	0.00370831	0.00404023	0.00321935	0.00198	0.00139131	0.00135399	0.00150767	0.0110284
(3b,6b,8b,12a)-8,12-Epoxy-7(11)-eremophilene-6-angeloyloxy-8,12-dimethoxy-3-ol	0.0114653	0.0071368	0.0157405	0.0112705	0.0115776	0.0116684	0.0297445	0.0119153	0.00890283	0.0122726	0.0118682	0.0122899
(3beta,5alpha)-5-Hydroxy-6-(hydroxyimino)cholestan-3-yl acetate	0.00162474	0.00163534	0.00208893	0.0015264	0.000897608	0.00155663	0.00159167	0.0015888	0.00185824	0.00122112	0.0019753	0.00173587
(3E,7E)-4,8,12-Trimethyl-1,3,7,11-tridecatetraene	0.00175	0.000930988	0.001137	0.00208278	0.00113118	0.00319339	0.00120749	0.00160277	0.00129685	0.00191537	0.00386243	0.00193024
(3R,5S)-1-pyrroline-3-hydroxy-5-carboxylic Acid	0.0426028	0.0460273	0.0327406	0.0408178	0.0327662	0.0399631	0.050215	0.0402927	0.0445637	0.040746	0.0340994	0.0509462
(3R,7R)-1,3,7-Octanetriol	0.00670982	0.00573214	0.00529666	0.00634511	0.00492804	0.00548903	0.00597352	0.00360512	0.00544739	0.00596321	0.00682314	0.0067907
(3S,5R,6S,7E,9x)-7-Megastigmene-3,6,9-triol 9-glucoside	0.0183286	0.0156941	0.0282567	0.0179619	0.00654303	0.0183501	0.0215158	0.0224606	0.0077928	0.0158985	0.0125424	0.0175599
(3S,6E,10E)-1,6,10,14-Phytatetraen-3-ol	0.00649052	0.00237555	0.00234087	0.00525432	0.0025277	0.00367813	0.00287307	0.00749061	0.00256858	0.00260466	0.00460245	0.00256538
(4-{6,11-dihydroxy-7-[3-hydroxy-5-methoxy-4-(sulfooxy)phenyl]-2,8-dioxatricyclo[7.3.1.0?,??]trideca-1(13),4,6,9,11-pentaen-3-ylidene}cyclohexa-2,5-dien-1-ylidene)oxidanium	0.0107271	0.0112568	0.013365	0.0114036	0.0122779	0.00978626	0.0111178	0.00956993	0.00491606	0.00558632	0.00650003	0.00511403
(4aS,6R,8S,8aR,10aR,11R,13aR,13bS)-6,8-Dihydroxy-11-(6-hydroxy-6-methylheptan-2-yl)-8a,10a-dimethyl-2-phenyldodecahydro-1H,5H-4a,13b-ethenobenzo[c]cyclopenta[h][1,2,4]triazolo[1,2-a]cinnoline-1,3(2H)-	0.58827	0.53005	0.467029	0.597905	0.558517	0.595868	0.507975	0.49548	0.545952	0.33924	0.473997	0.565974
(4E)-5-Hydroxy-2,2,6,6-tetramethylhept-4-en-3-one--manganese (3/1)	0.000831161	0.00223238	0.00403983	0.00105743	0.0027236	0.00284112	0.00463407	0.00210378	0.00541835	0.00258442	0.00462489	0.00731668
(4E)-5-Hydroxy-2,2,6,6-tetramethylhept-4-en-3-one--scandium (3/1)	0.0612394	0.0683194	0.0440015	0.0210774	0.0500095	0.0345908	0.0500588	0.0449084	0.0365187	0.0174065	0.0225281	0.0326227
(4E)-6-hydroxy-1-(4-hydroxy-3-methoxyphenyl)tetradec-4-en-3-one	0.124725	0.116322	0.127103	0.0892674	0.0798198	0.115811	0.115843	0.15203	0.127753	0.172584	0.121738	0.1368
(4-Methylphenyl)acetaldehyde	0.0188877	0.00033833	0.00041432	0.0159563	0.00117468	0.0126358	0.000459003	0.0222559	0.000431126	0.00496487	0.0242781	0.00279463
(6beta,7alpha,12beta,13beta)-7-Hydroxy-11,16-dioxo-8,14-apianadien-22,6-olide	0.040638	0.0417475	0.0301738	0.0284366	0.0344411	0.035379	0.0312213	0.0749539	0.028031	0.0452682	0.025767	0.0318462
(6R,7R)-3-{[(2-Amino-2-oxoethyl)sulfanyl]methyl}-7-{[(2Z)-2-(2-amino-1,3-thiazol-4-yl)-2-(methoxyimino)acetyl]amino}-8-oxo-5-thia-1-azabicyclo[4.2.0]oct-2-ene-2-carboxylic acid	0.0131682	0.0168032	0.0174248	0.0158432	0.0130664	0.0128705	0.0244072	0.011764	0.0164604	0.0190249	0.0127865	0.0133909
(7'R)-(+)-Lyoniresinol 9'-glucoside	0.0389023	0.0298606	0.0402166	0.043055	0.0358368	0.0519978	0.0584756	0.0725337	0.0450983	0.078884	0.0605493	0.0697564
(8E,12Z,14Z,24Z)-8-[(2-Acetylhydrazinyl)methylidene]-5,6,17,19-tetrahydroxy-23-methoxy-2,4,12,16,18,20,22-heptamethyl-1,9,11-trioxo-1,2,8,9-tetrahydro-2,7-(epoxypentadeca[1,11,13]trienoimino)naphtho[2	0.0113147	0.012757	0.0173194	0.0186394	0.00375453	0.00831595	0.00565119	0.0116233	0.00920635	0.0126927	0.0121271	0.0108552
(8'R)-Neochrome	0.0291766	0.0276988	0.0283824	0.0289225	0.0308954	0.0289388	0.0299257	0.0303379	0.0292286	0.0309981	0.0290052	0.0307294
(8Z,14E,24E)-5,6,17,19-Tetrahydroxy-23-methoxy-2,4,12,16,18,20,22-heptamethyl-1,9,11-trioxo-8-{[(1-oxo-1,3-dihydro-2H-isoindol-2-yl)amino]methylidene}-1,2,8,9-tetrahydro-2,7-(epoxypentadeca[1,11,13]tr	0.0151821	0.0274655	0.00297398	0.0129885	0.0103721	0.00489086	0.0160111	0.00729658	0.00814538	0.00348282	0.00347977	0.00933988
(alpha-keto-dimethyl-delta-N,N-Dimethylguanidynol) valeric acid	0.00461066	0.00337577	0.00504925	0.00431444	0.00578082	0.00489212	0.00585701	0.00407877	0.00317866	0.00491617	0.00259451	0.00436603
(aminomethyl)carbamic acid	0.0160369	0.0233217	0.0192196	0.0179616	0.0150641	0.019214	0.0193201	0.0358523	0.0182732	0.0137076	0.0175396	0.0252444
(DHQD)2Pyr	0.00979416	0.00965353	0.0132435	0.0166566	0.0100002	0.0131457	0.00791359	0.0126315	0.0046384	0.0106993	0.00593825	0.00820723
(E)-Monocrotophos	0.00109231	0.00147533	0.00112297	0.00122165	0.00122152	0.00202609	0.00396625	0.000883753	0.000824595	0.000716273	0.00330303	0.000555717
(Mannosyl)2-(N-acetylglucosaminyl)2-diphosphodolichol	0.0160138	0.014689	0.00934183	0.00941858	0.0100623	0.0209219	0.0209382	0.00799283	0.0147502	0.00644576	0.0034721	0.00780663
(R)-3-Hydroxy-5-phenylpentanoic acid	0.00361741	0.00613147	0.00396388	0.00439548	0.00426709	0.0036216	0.00309967	0.00420142	0.00552462	0.00368304	0.00349454	0.00571123
(R)-3-Hydroxybutyric acid	0.971228	0.486421	0.474947	0.355151	0.587208	1.60577	0.523782	1.45611	1.03157	1.71849	0.999058	0.896791
(R)-3-Hydroxydecanoic acid	0.131522	0.0901422	0.144802	0.210961	0.0744849	0.130563	0.0832829	0.184713	0.107971	0.086791	0.108125	0.129342
(R)-6'-O-(4-Geranyloxy-2-hydroxycinnamoyl)-marmin	0.00503005	0.0070028	0.00818659	0.00764945	0.00668211	0.00607053	0.00657552	0.00937108	0.00877085	0.00680792	0.00789168	0.00805223
(R)-Laudanidine	0.00698908	0.00450824	0.00796953	0.0175475	0.00778376	0.00648171	0.00611808	0.00855719	0.00695375	0.00875198	0.0144699	0.00215121
(R)-Rutaretin 1'-(6''-sinapoylglucoside)	0	0.000487874	0.00173062	0.00161802	0.00149805	0.00270704	0.00482259	0.00115925	0.000661835	0.000509428	0.00396309	0.000662314
(S)-[8]-Gingerol	0.0261621	0.0209105	0.0195255	0.0135835	0.0243626	0.0566223	0.0159833	0.0244091	0.0150389	0.0118221	0.0270454	0.0165942
(S)-2-((2S,3S)-2-((3S,4S)-4-((S)-2-((S)-2-((S)-2-((S)-2-Amino-3-methyl-butanoylamino)-3-hydroxypropanoylamino)-4-carbamoylbutanoylamino)-3-carbamoylpropanoylamino)-3-hydroxy-6-methyl-heptanoylamino)-3-methyl-pentanoylamino)-3-methyl-butyric acid	0.011835	0.00829414	0.00807148	0.00709417	0.0055742	0.00451197	0.00438361	0.00273858	0.00179262	0.00152389	0.00302617	0.00227366
(S)-3,4-Dihydroxybutyric acid	0.0435998	0.0531227	0.0409007	0.0474538	0.0444017	0.0461569	0.0415586	0.0449867	0.0687165	0.0473068	0.0614551	0.0770975
(S)-3-Mercaptohexyl pentanoate	0.00410397	0.00624774	0.00351577	0.004883	0.00603699	0.005654	0.0099714	0.0085541	0.00352819	0.00394495	0.00282523	0.00796923
(S)C(S)S-S-Methylcysteine sulfoxide	0.00856427	0.0102595	0.00878782	0.00848473	0.0101376	0.00944911	0.00661231	0.0113381	0.00762138	0.00820601	0.00761508	0.0092932
(S,S)-ANDEN-Phenyl Trost Ligand	0.00663287	0.00726768	0.0194209	0.0148604	0.00861562	0.00882709	0.0193809	0.00563178	0.00717284	0.0282879	0.0179551	0.0153672
(S1)-Methoxy-3-heptanethiol	0.0137563	0.0186244	0.0154035	0.0219007	0.0333833	0.0226142	0.0246464	0.0174141	0.0232436	0.0200478	0.0241583	0.0194614
(Z)-Resveratrol 3,4'-diglucoside	0.018099	0.0193975	0.0118892	0.00531187	0.00899914	0.0114507	0.0165172	0.00784814	0.0064014	0.00735188	0.00198908	0.0133252
[(16R)-5,7-dihydroxy-8,8,12,16-tetramethyl-3-[1-(2-methyl-1,3-thiazol-4-yl)prop-1-en-2-yl]-10-methylidene-9-oxo-17-oxa-4-azabicyclo[14.1.0]heptadec-4-en-11-yl]oxidanesulfonic acid	0.00850989	0.00696382	0.00922213	0.00977006	0.00940937	0.0125074	0.012531	0.0179961	0.0106133	0.0184362	0.0143884	0.0160482
[(4R,5R)-2,2-Diethyl-1,3-dioxolane-4,5-diyl]bis[bis(3,5-dimethylphenyl)methanol]	0.0316854	0.0295018	0.0293399	0.0285222	0.0322668	0.0309196	0.0326348	0.0290148	0.0259755	0.0233557	0.0272232	0.0332172
[[1,1'-Biphenyl]-2,2'-diylbis(methylene)]bis(dicyclohexylphosphane)	0.0159222	0.0152854	0.0500042	0.0456403	0.0337122	0.0110101	0.0374639	0.0863022	0.025492	0.0143692	0.0251933	0.0323932
[1~2~,2~2~:2~5~,3~2~:3~5~,4~2~:4~5~,5~2~-Quinquethiophene]-1~5~-carbaldehyde	0.0264868	0.0260296	0.0270581	0.0240179	0.0337884	0.0279363	0.0267651	0.0234627	0.0365183	0.0264321	0.0188935	0.0397959
[3-(7-hydroxy-4-oxo-4H-chromen-2-yl)phenyl]oxidanesulfonic acid	0.0584595	0.0771563	0.0707659	0.0587858	0.0584371	0.0670644	0.063819	0.0824741	0.0378351	0.049387	0.037983	0.0592705
[4-(4-methyl-3-oxopentyl)phenyl]oxidanesulfonic acid	0.0037732	0.0053799	0.00460557	0.00555285	0.00375249	0.00330469	0.00299855	0.00337316	0.00428851	0.00299419	0.00320274	0.00330102
[9-[1-(1-acetyl-3-acetyloxy-5-methylpiperidin-2-yl)ethyl]-10,11b-dimethyl-11-oxo-2,3,4,4a,5,6,6a,6b,7,10,10a,11a-dodecahydro-1H-benzo[a]fluoren-3-yl] acetate	1.2349	1.7949	1.18721	1.20826	0.771775	1.03573	1.07153	1.18662	1.34241	0.824346	0.577081	0.897635
[Nitrilotris(methylene)]trisphosphonic acid	0.00255483	0.00281607	0.00254853	0.00246518	0.00243231	0.00223134	0.0023879	0.00290707	0.00253359	0.00231735	0.00207639	0.00288517
{[(1R,16Z,24E,26E,28Z)-1,18-dihydroxy-12-[1-(4-hydroxy-3-methoxycyclohexyl)propan-2-yl]-19,30-dimethoxy-15,17,21,23,35-pentamethyl-2,3,10,14,20-pentaoxo-11,36-dioxa-4-azatricyclo[30.3.1.0?,?]hexatriaconta-16,24,26,28-tetraen-29-yl]methoxy}sulfonic acid	0.00673945	0	0.00736324	0.00733844	0.00564049	0.0131821	0.00371227	0.0053877	0.0151121	0.0128912	0.0090769	0.00477261
{11-hydroxy-16,18-dioxo-6,8,19-trioxapentacyclo[10.7.0.0?,?.0?,?.0??,??]nonadeca-1(12),2(9),4,10,13(17)-pentaen-14-yl}oxidanesulfonic acid	0.00246024	0.00279846	0.00301687	0.0025105	0.00238856	0.00238251	0.00394859	0.00273451	0.00326897	0.00357369	0.00261572	0.00280613
{2-hydroxy-5-[(1E)-3-oxo-3-[(3,4,5,6-tetrahydroxyoxan-2-yl)methoxy]prop-1-en-1-yl]phenyl}oxidanesulfonic acid	0.0214803	0.0220159	0.0232276	0.0222395	0.0222703	0.0202432	0.0206208	0.0204743	0.018877	0.0159319	0.0171685	0.0170103
{2-hydroxy-5-[3-(4-methoxy-1-benzofuran-5-yl)-3-oxopropanoyl]phenyl}oxidanesulfonic acid	0.0490988	0.0669598	0.054393	0.0485619	0.14348	0.154694	0.0735172	0.0552502	0.0464367	0.0470963	0.0419927	0.0781494
{3-[(2E)-3-phenylprop-2-enoyl]phenyl}oxidanesulfonic acid	0.0406455	0.0576695	0.0487668	0.0520469	0.0693613	0.0674882	0.0453391	0.0429347	0.0462473	0.0411677	0.0348744	0.0484311
{3-[3-(3,4-dihydroxyphenyl)-3-oxoprop-1-en-1-yl]-6-hydroxy-2-methoxyphenyl}oxidanesulfonic acid	0.0293329	0.0806299	0.0668916	0.0463876	0.0575053	0.0581726	0.0505779	0.0691536	0.0390476	0.0296334	0.035281	0.0559863
1-(1-{6-[3-(2-Carbamoylpyrrolidine-1-carbonyl)piperidin-1-yl]hexyl}piperidine-3-carbonyl)pyrrolidine-2-carboxamide (non-preferred name)	0.00446027	0.00645572	0.00647994	0.00524644	0.00451528	0.00430303	0.00470091	0.006802	0.00603505	0.00567576	0.00591762	0.00719699
1-(11Z,14Z-eicosadienoyl)-glycero-3-phosphate	0.0170876	0.0164862	0.0159518	0.0164885	0.017593	0.0172631	0.0167691	0.0177907	0.0173345	0.0147186	0.015895	0.0185413
1-(11Z-eicosenoyl)-glycero-3-phosphate	0.0246508	0.0283606	0.0306167	0.0301388	0.0270779	0.0253999	0.0279526	0.0318397	0.0329193	0.0304126	0.0291911	0.0318883
1-(1-Methoxy-1-methylethyl)-4-methylbenzene	0.0198198	0.0153789	0.0333282	0.00931685	0.0165132	0.012139	0.0192408	0.0298724	0.0434909	0.0209089	0.0154052	0.0127228
1-(1-Propenylthio)propyl propyl disulfide	0.0115303	0.0110852	0.010991	0.0111647	0.0109373	0.0156065	0.0135325	0.010122	0.0110977	0.0112673	0.0238014	0.0119241
1-(beta-D-Ribofuranosyl)-1,4-dihydronicotinamide	0.00113147	0.00307346	0.0012899	0.00398961	0.00359683	0.00315036	0.0030105	0.0028998	0.00306139	0.00386752	0.00340814	0.00354693
1-(dimethylamino)-2-methyl-3,4-diphenylbutane-1,3-diol	0.00849341	0.00881604	0.00500757	0.00334244	0.00750754	0.00717563	0.0141315	0.0126588	0.00557992	0.00399854	0.0038226	0.00836497
1-(Malonylamino)cyclopropanecarboxylic acid	0.0850796	0.114388	0.0831644	0.0952296	0.0751026	0.0625595	0.0656434	0.0565084	0.0628257	0.0699938	0.0501751	0.0916951
1-(O-alpha-D-glucopyranosyl)-(1,3R,27R)-octaconsanetriol	0.047867	0.0664046	0.0731902	0.0699675	0.0538675	0.051972	0.0601783	0.0780668	0.0781703	0.0691797	0.0699507	0.0751066
1-(Triethylgermyl)pyrrolidine-2,5-dione	0.000858924	0.000784564	0.000545699	0.00065366	0.000536657	0.00142059	0.00202673	0.000371397	0.000229476	0.000214673	0.00229435	0.000347664
1,1',1'',1'''-(3,6-Dihydroxybenzene-1,2,4,5-tetrayl)tetra(heptan-1-one)	0	0.00121419	6.74e-05	0.00222479	0.00218444	0.0022844	0.00216952	0.00324061	0.00344948	0.00371959	0.00365504	0.0041045
1,1',1'',1''',1'''',1'''''-[Benzene-1,2,3,4,5,6-hexaylhexakis(methyleneoxy)]hexabenzene--toluene (1/2)	0.000834659	0.0110641	0	0.000224171	0.186003	0.0277649	0.0275712	0.00440785	0.027159	0.00144657	0.00511993	0.00464302
1,1,8,8-Tetrakis(diphenylphosphoryl)octane-1,8-diol	0.00152556	0.00198005	0.00200536	0.00188228	0.00261958	0.0030781	0.00127799	0.00284788	0.00216422	0.0018237	0.00148728	0.00278219
1,11-Undecanediamine, N,N'-di-9-acridinyl-	1.00336	0.90158	0.574967	0.754294	0.774492	0.806106	0.623888	0.714549	0.486612	0.384717	0.691156	0.849765
1,11-Undecanedicarboxylic acid	0.00152967	0.00197458	0.00168557	0.00202066	0.00178806	0.0018923	0.00155433	0.00211721	0.00211689	0.00213053	0.00199211	0.00240412
1,1'-Ethylidenebistryptophan	0.00209608	0.000342953	0.000811157	0.00164011	0.00123199	0.00127935	0.00211834	0.00108788	0	0.00117117	0.00197022	0.000234811
1,2,10-Trihydroxydihydro-trans-linalyl oxide 7-O-beta-D-glucopyranoside	0.611619	0.660509	0.512515	0.432697	0.546617	0.545945	0.456383	1.23122	0.453773	0.64915	0.424211	0.459153
1,2,3,4-Tetrahydro-beta-carboline	0.00859385	0.00625065	0.0078612	0.010598	0.00886411	0.00692908	0.00765244	0.00942084	0.0102004	0.0215271	0.0105226	0.00741845
1,2,3-Trihydroxybenzene	0.00273009	0.00499955	0.00416691	0.00500703	0.00625226	0.00402185	0.0050878	0.00444956	0.00708492	0.00595254	0.00646691	0.00572527
1,2,3-Tris(decyloxy)-5-isocyanatobenzene	0.0174433	0.0135864	0.0107987	0.00758312	0.010269	0.0140805	0.0109265	0.0130078	0.00956242	0.0126907	0.00866011	0.00952955
1,25-Dihydroxyvitamin D3-26,23-lactone	0.00326189	0.00385811	0.00343884	0.00342802	0.003458	0.00328077	0.0030786	0.00298491	0.00347979	0.00381561	0.00380739	0.00384597
1,26-Dicaffeoylhexacosanediol	0.0115717	0.00737704	0.00437815	0.00389651	0.0079357	0.00502393	0.00656517	0.00381534	0.00352564	0.00532183	0.00266132	0.00471476
1,28-Octacosanediol diferulate	0.051121	0.00637845	0.0401875	0.0324775	0.0274161	0.0590895	0.0225968	0.0343456	0.0750481	0.0312768	0.0217998	0.0368724
1,2-Bis(9,16-dioxahexacosa-11,13-diynoyl)-sn-3-phosphocholine	0.0353825	0.102398	0.0558431	0.0676711	0.0435936	0.0291099	0.0415473	0.0642563	0.0916623	0.0676984	0.0533536	0.0434509
1,2-Di-(9Z,12Z,15Z-octadecatrienoyl)-3-(Galactosyl-alpha-1-6-Galactosyl-beta-1)-glycerol	0.0107776	0.00953152	0.0111628	0.0106369	0.00377055	0.00643875	0.0108077	0.0114899	0.00416422	0.00304092	0.00400718	0.00686504
1,2-Di-(heptacosadiynoyl)-sn-glycero-3-phosphocholine	0.493811	0.819728	1.16319	0.862304	0.477129	0.456267	0.581442	1.00155	1.06816	0.7384	0.996938	1.04948
1,2-Dihydroxy-3,4-epoxy-1,2,3,4-tetrahydronaphthalene	0.0848617	0.0879658	0.0891507	0.0872308	0.0875677	0.0882311	0.0881162	0.0894269	0.0903069	0.0871119	0.0873001	0.0869122
1,2-Di-O-palmitoyl-3-O-(6-sulfoquinovopyranosyl)glycerol	0	0	0.000289318	0.00017391	0.00010244	0.00246713	0.0242788	0.00204234	0.00553395	6.73e-05	0	0
1,2-Diundecanoylphosphatidylethanolamine	0.0282663	0.0191743	0.02474	0.0172114	0.00713757	0.00870225	0.0125002	0.0187856	0.0110879	0.0159498	0.00881988	0.0114196
1,2-Ethanediamine, N,N,N'-trioctyl-N'-[2-(octylamino)ethyl]-	0.00235394	0.00195015	0.00203394	0.00175083	0.00154774	0.001814	0.00184459	0.00206683	0.0020504	0.00198052	0.00176991	0.00217909
1,2-Ethanediyldicarbamodithioic acid	0.0275476	0.0213351	0.0237897	0.022666	0.0162234	0.017798	0.0206085	0.0180093	0.00892499	0.0123206	0.00904061	0.0136412
1,3,4-Thiadiazole-2(3H)-thione, 5-((3-nitro-2-pyridinyl)thio)-	0.0317716	0.03262	0.0332935	0.0324454	0.0347701	0.031555	0.0335175	0.0320372	0.0341963	0.0326408	0.0336492	0.032916
1,3,4-Thiadiazolidine-2,5-dithione, disodium salt	0.0275631	0.0162504	0.0122182	0.0351643	0.00291561	0.00749714	0.00142231	0.00441171	0.0119383	0.00829416	0.00423045	0.00600233
1,3,6-Naphthalenetrisulfonic acid, 8,8'-((1,1'-biphenyl)-4,4'-diylbis(sulfonylimino))bis-	0.00694515	0.00831879	0.0103005	0.00763223	0.0138195	0.0107578	0.00594898	0.0123579	0.00802077	0.00828127	0.00612288	0.00834681
1,3-Benzenediol, 2-[[4-[(2,5-dimethylphenyl)azo]-2,3-dimethylphenyl]azo]-4-[[4-[(2-methoxyphenyl)azo]-2,5-dimethylphenyl]azo]-	0.0180409	0.0423861	0.0256046	0.0497858	0.0469271	0.0236762	0.0191917	0.0825863	0.0175039	0.0141014	0.015689	0.0211572
1,3-bis(2-ethylhexoxy)propan-2-amine	0.00596458	0.00571135	0.00635427	0.00564718	0.00514277	0.00504626	0.00478832	0.00789973	0.00437189	0.00711956	0.0103034	0.00432352
1,3-Cyclohexadien-5-yne	0.00392848	0.00392853	0.00323709	0.00369124	0.00378284	0.00391631	0.00444202	0.00412424	0.00313788	0.00418089	0.00360606	0.00372082
1,3-Naphthalenedisulfonic acid, 7-[(1,8-dihydroxy-3,6-disulfo-2-naphthalenyl)azo]-, tetrasodium salt	0.00427701	0.0043452	0.00494667	0.00492554	0.00484892	0.00475092	0.00448592	0.00461786	0.00483993	0.00463576	0.00413037	0.00508506
1,4,36,39-Tetra-tert-butylcycloheptaconta-1,2,3,5,7,9,11,13,15,17,19,21,23,25,27,29,31,33,35,39,41,43,45,47,49,51,53,55,57,59,61,63,65,67,69-pentatriacontaen-37-yne	0.00366858	0.00107394	0.00105849	0.00143788	0.00240376	0.00562347	0.00278618	0.00324265	0.00635015	0.00303392	0.00213237	0.00268092
1,4,5,8-Tetrakis[4-(propan-2-yl)anilino]anthracene-9,10-dione	0.00845286	0.0257611	0.008338	0.00779425	0.00666965	0.0129102	0.0237968	0.0160858	0.00940121	0.0168075	0.00747262	0.011883
1,4,8,11,15,18,22,25-Octa-n-butoxyphthalocyanine	0.00572382	0.00284752	0.00228846	0.00198636	0.000740049	0.00172989	0.00146912	0	0	0	0.000620771	0.000744666
1,4-Butanediamine, N,N'-bis(3-aminopropyl)-N,N'-diethyl-	0	0.000886973	0.000886919	0.00118212	0.00394146	0.00344876	0.00272797	0.00162998	0.00137668	0.00192242	0.00436432	0.0020233
1,4-Ipomeadiol	0.0112535	0.0127118	0.0110161	0.0113734	0.00833984	0.00963461	0.0104136	0.00719952	0.00693091	0.00524228	0.0085492	0.010488
1,6-Bis(2,2,6,6-tetramethyl-4-piperidylamino)hexane	0.000894016	0.00136768	0.00156527	0.00137142	0.00135617	0.00156354	0.0017474	0.00113444	0.00177531	0.00187359	0.00166706	0.0012709
1,6-Hexanediaminium, N,N,N',N'-tetrabutyl-N,N'-diethyl-, bis(ethyl sulfate)	0.00307214	0.00443395	0.00335261	0.00316415	0.00365868	0.00319636	0.0041071	0.00362328	0.00378438	0.00364496	0.00371747	0.00361247
1-[(2,2-Dinonyl-1,3-dioxolan-4-yl)methyl]piperidine	0.00510051	0.00691087	0.0100362	0.00782196	0.00522145	0.00670612	0.0075464	0.00839881	0.0118747	0.0144156	0.0112146	0.00829865
1-[2,4-dihydroxy-5-(3-methylbut-2-en-1-yl)phenyl]-2-hydroxy-3-[4-hydroxy-3-methoxy-5-(3-methylbut-2-en-1-yl)phenyl]propan-1-one	0.00730729	0.0146347	0.00360892	0.00298552	0.00333407	0.004543	0.00793623	0.00450103	0.0027015	0.00347666	0.00464437	0.0108242
1-[Bis(2-hydroxyethyl)amino]-1-oxohexadecane-2-sulfonic acid	0.0252919	0.0270161	0.0263412	0.024737	0.0263119	0.0240434	0.0245301	0.0292247	0.0254278	0.0294133	0.026986	0.0329489
1-{[5-(Aminomethyl)-3-methylheptyl]amino}-3-{[4-(aminomethyl)-2-methylhexyl]amino}propan-2-ol	0.00378866	0.00345656	0.00467571	0.00333142	0.0061568	0.00279987	0.00355506	0.0104968	0.00504148	0.00431952	0.00395987	0.00423714
1~5~,3~5~-Bis(9,9-dioctyl-9H-fluoren-2-yl)-1~2~,2~2~:2~5~,3~2~-terthiophene	0.019303	0.0266155	0.0201033	0.00982134	0.00130075	0.00369282	0.00769394	0.0129992	0.01743	0.0131368	0.0134462	0.0101683
10,11-dihydro-20-trihydroxy-leukotriene B4	0.156156	0.0480451	0.0534577	0.118915	0.0850918	0.0324992	0.200323	0.240239	0.0702309	0.151904	0.108045	0.0359299
10-Hydroperoxy-H4-neuroprostane	0.0344613	0.0278334	0.01446	0.0187039	0.019657	0.0240462	0.0188863	0.0164317	0.0121184	0.0127543	0.0110298	0.0209912
10Z-Nonadecenoic acid	0.000677623	0.000182077	0.00188172	0.00119033	0.00159487	0.000924362	0.000698715	0.00264219	0.000905324	0.00121941	0.00127655	0.00128542
11-(Dodecyldisulfanyl)undecan-1-ol	0	0.00149942	0.00295163	0.00419898	0.00469201	0.00194163	0.00363706	0.00683245	0.00306755	0.00338371	0.00304106	0.00432535
11beta,21-Dihydroxy-16alpha,17-(isopropylidenedioxy)pregna-1,4-diene-3,20-dione 21-pivalate	0.0271804	0.0369863	0.0381499	0.0347332	0.0171379	0.0268146	0.0210405	0.0234164	0.0365022	0.0521881	0.0456979	0.0398638
11-Hydroxy-12-methoxydihydrokawain	0.00975818	0.00500952	0.0086895	0.00491205	0.00778385	0.00752916	0.0110509	0.00613111	0.00524316	0.00808014	0.00486032	0.00549133
11-N-(3-Acetylbenzenesulfonyl)undecanoyl tryptamine	0.00990045	0.0135108	0.0239068	0.0186389	0.0116413	0.0141613	0.0205873	0.0217207	0.0266099	0.0464932	0.0352565	0.0235528
11alpha-Hemiglutaryloxy-1,25-dihydroxyvitamin D3	7.22e-05	0.00332047	0.000372276	0.00559678	0.00626529	0.00500799	0.0063899	0.00765045	0.00972883	0.0123913	0.0121835	0.0136939
12-(3,4-dihydroxyphenyl)-13-hydroxy-6-(4-hydroxy-3-methoxyphenyl)-8-{[3,4,5-trihydroxy-6-(hydroxymethyl)oxan-2-yl]oxy}-3,11-dioxatricyclo[8.4.0.0?,?]tetradeca-1,7,9-trien-4-one	0.00188971	0.00440302	0.00622504	0.00515879	0.00427022	0.00869429	0.0177374	0.0044812	0.00271107	0.00208234	0.0137432	0.00227584
12,15-Epoxy-13,14-dimethyleicosa-10,12,14-trienoic acid	0.0331783	0.0269146	0.0583525	0.020919	0.00756594	0.0370562	0.0361351	0.0444021	0.00882824	0.0300436	0.0121051	0.0194141
12-amino-dodecanoic acid	0.00109283	0.000382172	0.000757785	0.00183834	0.00136728	0.00603249	0.00108447	0.0013193	0.000956434	0.00279563	0.00137214	0.000805614
12-azidododecanoic acid	0.0204422	0.0217723	0.0318286	0.0231727	0.0145779	0.0246558	0.0218857	0.0498057	0.021809	0.026042	0.0225988	0.0312776
12-Hydroxydodecanoic acid	0.0909988	0.0576738	0.112476	0.147428	0.0549873	0.101767	0.0709558	0.148765	0.0814847	0.0688103	0.0856298	0.117458
12-Ketodeoxycholic acid	0.00398915	0.0107325	0.0154662	0.0150703	0.0161772	0.00866247	0.0137463	0.0155017	0.00959597	0.0107585	0.0134602	0.0149533
12-Oxa-2,6,10-triazatetradecanoic acid, 4,8-dihydroxy-3-((4-(4-methoxybutoxy)phenyl)methyl)-13,13-dimethyl-11-oxo-9-(phenylmethyl)-, 1,1-dimethylethyl ester, (3S-(3R*,4S*,8S*,9R*))-	0.0194618	0.0181741	0.0228078	0.0144862	0.0130241	0.0194681	0.0194887	0.0264992	0.0144947	0.0189247	0.0134987	0.0155953
13-(2-Dodecanyl)-6-(1-hydroxyethyl)-3-(hydroxymethyl)-9-isopropyl-12-methyl-1-oxa-4,7,10-triazacyclotridecane-2,5,8,11-tetrone	0.00203137	0.00363487	0.00631772	0.00238257	0.00413339	0.00454054	0.00642014	0.00360888	0.00751306	0.00423486	0.00826188	0.0101773
13-(3,4-dihydroxyphenyl)-5-(4-hydroxyphenyl)-4,12,14-trioxapentacyclo[11.7.1.0?,??.0?,?.0??,??]henicosa-2(11),3(8),9,15,17,19-hexaene-6,9,17,19,21-pentol	0.0116052	0.00372233	0.0068538	0.00543984	0.0046411	0.00833401	0.0161667	0.00771905	0.00218786	0.00184296	0.0157598	0.00361149
13,14-Dihydro PGF-1a	0.00601118	0.00721108	0.00722707	0.00856993	0.00712554	0.0058075	0.00925875	0.00702101	0.0095023	0.00821499	0.00806837	0.00901144
13,14-dihydroxy-9-oxo-8,17-dioxatetracyclo[8.7.0.0?,?.0??,??]heptadeca-1(10),2(7),3,5,11(16),12,14-heptaen-5-yl acetate	0.00858586	0.0109932	0.0102007	0.00947378	0.00765813	0.00774012	0.0136278	0.00894792	0.0127785	0.0126257	0.0101003	0.00788497
13,16,19,22,25,28,31-Heptaoxatritetracontane	0.000386683	0.000395558	0.00145346	0.00146045	0.00508818	0.00197627	0.00180298	0.00160794	0.00135756	0.00178393	0.00241284	0.0024187
13E-Tetranor-16-carboxy-LTE4	0.0121931	0.0058777	0.00723762	0.00813937	0.010371	0.013742	0.0132505	0.00613841	0.00455472	0.00546185	0.00613951	0.00612626
13-HODE	0.0136017	0.0240684	0.0196012	0.0163492	0.0176743	0.0327947	0.0334807	0.0597882	0.0118341	0.0187864	0.0161342	0.0546486
13-Hydroxy-9-methoxy-10-oxo-11-octadecenoic acid	0.0149298	0.0141455	0.0254715	0.00872441	0.013899	0.0109557	0.0178205	0.027576	0.0373894	0.0175391	0.0132397	0.012633
13Z-Docosenamide	0.0114078	0.0120904	0.0175423	0.0182115	0.0190068	0.0153516	0.0173692	0.0194089	0.0180951	0.0170865	0.0182445	0.0215438
14,15-DiHETrE	0.000563895	0.000886136	0.000471501	0.00105085	0.000922583	0.00161801	0.00254402	0.00116538	0.000916814	0.000312009	0.0027137	0.000632673
14-hydroxyclarithromycin	0.0263133	0.0299001	0.0189185	0.0207539	0.01611	0.0119813	0.0111564	0.0110216	0.0100124	0.0093973	0.00867698	0.00519884
15beta-Hydroxydesogestrel	0.0247052	0.0217542	0.0459775	0.0199981	0.00557887	0.0243051	0.0297644	0.0542068	0.0152809	0.0320573	0.0214738	0.0296574
15-Keto-13,14-dihydroprostaglandin A2	5.83e-05	0.000618331	0.000766157	9.7e-05	0.000823281	0.000929982	0.00116911	0.000356054	0.00187196	0.000402219	0.00125362	0.00200531
16-Hydroxy hexadecanoic acid	0.0567375	0.0411265	0.0529443	0.0240899	0.0370777	0.0344697	0.0346069	0.0369102	0.0344064	0.0302047	0.0309	0.0456421
17-(2-Dodecylphenoxy)-3,6,9,12,15-pentaoxaheptadecan-1-ol	0.0415716	0.0364527	0.0441979	0.0387327	0.0246804	0.0278282	0.0386404	0.046809	0.0380387	0.0346101	0.0363988	0.0443407
17beta-hydroxy-5beta-estran-3-one	0.00117738	0.00145483	0.00155379	0.00164029	0.000916079	0.00162563	0.00168221	0.00206863	0.000931915	0.00103726	0.00147891	0.00197042
17-phenyl trinor PGF2alpha cyclohexyl amide	0.00881555	0.00903039	0.00502173	0.00606896	0.00483462	0.00551716	0.00659118	0.00648854	0.00613725	0.0046072	0.00493581	0.00650652
18-Carboxy-dinor-LTE4	0	0.00143998	0.00185204	0.0019699	0.00197096	0.0019045	0.00277594	0.00324588	0.00188352	0.00236797	0.00258608	0.00310654
19,24-Dioctadecyldotetracontane	0.0244225	0.0239088	0.0226769	0.019493	0.0291235	0.0242955	0.0158733	0.0245231	0.0232295	0.0168588	0.0162522	0.0209015
19-norcholestanol	0.00106021	0.000728517	0.00155743	0.00086862	0.00378079	0.00228332	0.00262994	0.00150835	0.00328597	0.00288165	0.00108916	0.00177513
1-Acetoxy-2-hydroxy-16-heptadecyn-4-one	0.108564	0.0990667	0.0887458	0.0849937	0.0706098	0.0986251	0.076312	0.097439	0.0833226	0.0926123	0.0871609	0.0962951
1-alpha-Acevaltrate	0.0327874	0.0246278	0.0396111	0.0201392	0.00551586	0.0257235	0.0353049	0.0365062	0.0116251	0.0183133	0.0153209	0.0245021
1-Aminohexadecan-2-ol	0.00640804	0.00389377	0.00433431	0.00443319	0.00598173	0.00416625	0.00465474	0.0076895	0.00577521	0.00499424	0.00480741	0.00502091
1-Deoxy-D-glucitol	0.0194561	0.0195728	0.0138848	0.0143628	0.0252707	0.0260092	0.0195631	0.0161238	0.0193732	0.0164431	0.0159044	0.0214632
1-Dimethylphosphoryl-3-nitrobenzene	0.00188559	0.0012729	0.00160373	0.00175516	0.00201359	0.00130508	0.00167061	0.00203356	0.00162949	0.00230953	0.00209712	0.00192841
1-docosene	0.00269428	0.00295488	0.00381008	0.00386042	0.00913689	0.0050437	0.00552856	0.00840092	0.00790891	0.00686075	0.00641231	0.0063067
1-Dodecanamine	0.107036	0.116692	0.0840401	0.115539	0.067374	0.0908834	0.100615	0.0564093	0.083411	0.102818	0.133233	0.11225
1-Dodecanamine acetate	0.0116231	0.00629478	0.00665782	0.012232	0.00691653	0.0136316	0.00680782	0.0068116	0.006239	0.00829613	0.0200405	0.0119113
1H-1,2,3-Triazole-4-thiol, disodium salt	0.0250013	0.0408966	0.0270718	0.0284977	0.0285486	0.0302244	0.0160741	0.0336439	0.0229781	0.0204416	0.0161064	0.0187253
1-Heptadecanamine, N,N-dimethyl-	0.00361421	0.000905683	0.000860711	0.011711	0.0498536	0.0113948	0.00351346	0.00219402	0.0013367	0.0503511	0.00409627	0.00169165
1H-Indole-3-carboxaldehyde	0.0162705	0.0163096	0.0121244	0.0120542	0.0205072	0.0207215	0.0158403	0.0138318	0.0144682	0.0137566	0.0122829	0.0173934
1H-Pyrrolo(3,4-c)pyridine-1,3(2H)-dione, 6-methyl-4-(1-piperidinyl)-2-(3-(4-(2-pyrimidinyl)-1-piperazinyl)propyl)-	0.0173088	0.0234836	0.0153832	0.0201608	0.0200686	0.017321	0.0245154	0.0192231	0.0311759	0.0205946	0.0182246	0.0246836
1-Isomangostin hydrate	0.00697023	0.00846956	0.00978344	0.00834876	0.00883027	0.0107214	0.0184399	0.0138419	0.0138787	0.0103497	0.0137833	0.0124845
1-Methoxy-1-(2,4,5-trimethoxyphenyl)-2-propanol	0.0200221	0.0142814	0.0274938	0.0357679	0.0116334	0.0233245	0.0172272	0.0305005	0.01897	0.0138708	0.0185755	0.022004
1-Methyl-4-nitroimidazole	0.00553132	0.005768	0.00620574	0.00572622	0.00599307	0.00629553	0.00627508	0.00610744	0.00666031	0.00619122	0.00646758	0.00691611
1-Methyl-6-phenyl-1H-imidazo[4,5-b]pyridin-2-amine	0.0178865	0.0144091	0.0304778	0.0131178	0.00395133	0.0235812	0.0192399	0.0196674	0.00831146	0.015372	0.0115187	0.0219512
1-Naphthalenediazonium, 4-[(3-sulfophenyl)azo]-, sulfate (2:1)	0.00269424	0.00117522	0.00380242	0.000988485	0.00389071	0.00148797	0.00320154	0.00565598	0.00317852	0.00398976	0.000318284	0.00116467
1-octadecylglycero-3-phosphocholine	0.0144326	0.0196392	0.0223332	0.0164012	0.0142077	0.0123951	0.0140881	0.0214385	0.0210852	0.0198525	0.01898	0.0227909
1-Palmitoyl-2-(5-hydroxy-8-oxo-6-octenedioyl)-sn-glycero-3-phosphatidylcholine	0.0373702	0.115354	0.0302009	0.0410804	0.0402333	0.0155877	0.0435863	0.0287951	0.0434312	0.0103711	0.0209529	0.0198979
1-Palmitoylglycerophosphocholine	0.10271	0.111791	0.114146	0.115132	0.110403	0.108169	0.104157	0.121003	0.122681	0.127955	0.134562	0.123779
1-pentadecanoyl-glycero-3-phosphate	0.0935947	0.112447	0.112766	0.067114	0.0735867	0.111014	0.159468	0.152793	0.139821	0.199832	0.157102	0.173958
1-Pentanesulfenothioic acid	0.0316382	0.00458563	0.0159383	0.0092021	0.0381745	0.00665038	0.0286742	0.0057162	0.0243335	0.0120317	0.0195506	0.00693837
1-Phenyl-1,3-nonadecanedione	0.00148813	0.00183661	0.00165341	0.00174707	0.00186338	0.00229056	0.00165544	0.00151802	0.0019546	0.00157461	0.00181263	0.00152299
1-Piperazinecarbodithioic acid	0.0494237	0.0527872	0.0462678	0.0418577	0.067631	0.0909483	0.0630974	0.0833674	0.103514	0.11182	0.0847492	0.0654729
1-Piperazineethanamine, monoacetate	0.0130569	0.00999263	0.0162933	0.0222425	0.00789423	0.0157307	0.00801574	0.0212334	0.0125416	0.00890658	0.0120092	0.0133554
1-Propanaminium, 3,3',3'',3'''-[(9,10-dihydro-9,10-dioxo-1,4,5,8-anthracenetetrayl)tetraimino]tetrakis[N,N,N-trimethyl-, salt with 4-methylbenzenesulfonic acid (1:4)	0.0169488	0.0172351	0.00751687	0.0103544	0.0073005	0.0191219	0.0192434	0.00516443	0.0167964	0.0081114	0.00496197	0.0159264
1-Stearoylglycerophosphocholine	1.79681	2.28445	2.64823	2.33579	1.86397	1.75974	1.95649	2.57838	2.65279	2.24174	2.42512	2.55352
1-Stearoylglycerophosphoglycerol	0.0053715	0.00491325	0.00484963	0.00458745	0.00479583	0.00391233	0.00455717	0.00438524	0.00377813	0.00250559	0.00412459	0.00292318
1-tert-Butylpiperidin-4-amine	0.00616284	0.00467963	0.0047996	0.00761972	0.00697249	0.00817659	0.00554546	0.00581427	0.00498594	0.00446097	0.00709144	0.00476323
1-tetradecanoyl-sn-glycero-3-phosphate	0.00227016	0.00362932	0.00681706	0.00411896	0.00230307	0.00181057	0.00491651	0.00376616	0.0118062	0.0243103	0.00732512	0.00668952
1-Tridecanol, hydrogen phosphate, compd. with N,N-dimethylcyclohexanamine (1:1)	0	0	0.00186555	0.00248859	0.00638597	0.00193835	0.00269562	0.00173078	0.000397577	0.00230401	0.00349781	0.00352675
1alpha,25-dihydroxy-2alpha-(3-hydroxypropoxy)vitamin D3	0.00136154	0.0121077	0.00210324	0.0195517	0.0194233	0.0185387	0.0190057	0.019199	0.0230846	0.0277111	0.0303839	0.0320133
2-((Carboxymethyl)thio)-5-nitrobenzoic acid	0.00841911	0.009465	0.00913914	0.0123764	0.0100067	0.0103586	0.00851198	0.0118406	0.0125932	0.0107246	0.0129102	0.0097164
2-(1-Ethoxyethoxy)propanoic acid	0.00327672	0.00333494	0.00438403	0.00316426	0.00232527	0.00338523	0.00299275	0.00350332	0.0041162	0.00314826	0.00461018	0.00441745
2-(2,5-dihydroxy-4-methoxyphenyl)-3,5,6,7-tetrahydroxy-3,4-dihydro-2H-1-benzopyran-4-one	0.0138563	0.0165367	0.0162661	0.0149794	0.0126208	0.0124672	0.0256401	0.012502	0.0154569	0.0169426	0.0133171	0.0116929
2-(3-Hydroxyandrost-5-en-17-ylidene)hydrazine-1-carboxamide	0.114484	0.0902673	0.204122	0.0789461	0.0215053	0.102893	0.127605	0.200295	0.0546088	0.124985	0.0532243	0.111749
2-(3-hydroxyphenyl)-3,4-dihydro-2H-1-benzopyran-3,5,7-triol	0.00713483	0.00998242	0.0100845	0.00616035	0.00539167	0.00818721	0.0192369	0.00890506	0.00429684	0.00628595	0.00315051	0.00878081
2-(4-((1,3-Dioxo-3-phenylpropyl)amino)phenyl)-1-octadecyl-1H-benzimidazole-5-sulphonic acid	0	0.000543015	0.00525308	0.00531553	0.00398065	0.0003141	0.00430685	0.0109242	0.00120903	0.00109832	0.00351818	0.00365067
2-(4-(Hydroxyamino)phenyl)-1-octadecyl-1H-benzimidazole-5-sulphonic acid	0.134278	0.124043	0.110238	0.118074	0.134874	0.129528	0.13123	0.127009	0.125239	0.106609	0.144477	0.167973
2-(6-{2,4-dihydroxy-3-[(1E)-3-methylbut-1-en-1-yl]benzoyl}-5-(2,4-dihydroxyphenyl)-3-(hydroxymethyl)cyclohex-2-en-1-yl)benzene-1,3-diol	0.023246	0.0279401	0.0231255	0.0218968	0.0195576	0.0118632	0.0360077	0.0324439	0.00813034	0.0105138	0.0106357	0.0217893
2-(Arabinosylamino)-3-(glucosylamino)propanenitrile	0.0226795	0.162175	0.0234718	0.0799043	0.0208262	0.0549587	0.104247	0.100338	0.0300893	0.0542963	0.0220111	0.0287607
2-(Aziridin-1-yl)but-3-en-1-yl hexadecanoate	0	0.00128481	0.00468516	0.00385372	0.00560665	0.0802645	0.00947897	0.0169131	0.00400731	0.0119391	0.00238054	0.00170408
2-(Formamido)-N1-(5-phospho-D-ribosyl)acetamidine	0.024684	0.028463	0.0275496	0.0251717	0.0279219	0.0303104	0.0297569	0.030553	0.0210356	0.039466	0.0162911	0.0276627
2-(N-3'-Sialyllactityl)aminopyridine	0.0251545	0.0228678	0.0244057	0.028669	0.0242953	0.0257478	0.0274279	0.0284685	0.0299373	0.022475	0.0298883	0.0310591
2,2',2'',2''',2'''',2'''''-[3,7,11,18,22,26-Hexaazatricyclo[26.2.2.2~13,16~]tetratriaconta-1(30),13,15,28,31,33-hexaene-3,7,11,18,22,26-hexayl]hexakis(N-decylacetamide)	0.00997957	0.00964622	0.00515366	0.00660343	0.00474439	0.0122018	0.0117923	0.0040767	0.0104422	0.00641345	0.0019919	0.00884379
2,2,4,4-Tetrakis(2,6-diethylphenyl)-1,2,4-oxadigermetane	0.018265	0.0178991	0.0188729	0.0182426	0.016814	0.0175825	0.0181733	0.0185144	0.0184537	0.0143044	0.0177179	0.0172323
2,2,7,7-Tetramethyl-1,6-dioxaspiro[4.4]nona-3,8-diene	0.0237493	0.0193657	0.0461633	0.0181054	0.00681758	0.0300825	0.0304032	0.0312147	0.0116675	0.0205907	0.0155917	0.0280713
2,2-dimethyl-13-methylsulfonyltridecanenitrile	0.00539151	0.00562098	0.00307084	0.00257759	0.006931	0.0069094	0.00850836	0.0098841	0.00445876	0.00397095	0.0037509	0.00738127
2,2-dimethyl-3,4-dihydro-2H-1-benzopyran-4,5,7-triol	0.00581074	0.00307073	0.00390182	0.00356556	0.004524	0.00547195	0.00524774	0.00140589	0.000673181	0.00359607	0.00658046	0.00568901
2,2-Dimethyl-N-(2-{(2-methylpropyl)[(1-methyl-1H-pyrrol-2-yl)methyl]amino}-2-oxoethyl)-N-(prop-2-en-1-yl)propanamide	0.0139678	0.0114783	0.0240865	0.0109963	0.00407242	0.0178497	0.0127585	0.0234045	0.00511447	0.00742055	0.00580621	0.0160459
2,2'-Dithiobis(N-Decylbenzamide)	0.180301	0.171445	0.159264	0.1643	0.166084	0.169894	0.172162	0.173129	0.169784	0.146201	0.182042	0.223837
2,2'-Sulfanediylbis(1,3-dithiane)	0.00362044	0.0033598	0.00339979	0.00318735	0.00134637	0.00359335	0.000393572	0.00271229	0.00266917	0.00292066	0.00239074	0.00273184
2,3,6,7,10,11-Hexakis(undecyloxy)triphenylene	0.0080672	0.00719208	0.00448214	0.00617008	0.00571882	0.011253	0.0128766	0.00328964	0.00773589	0.00679087	0.00358284	0.00625382
2,3-Bis(tetradecyloxy)propyl methyl phosphate	0.00358914	0.00361673	0.00372308	0.00336558	0.00354406	0.00358357	0.00462767	0.00363129	0.00267097	0.00382928	0.00242151	0.00368963
2,3-Diacetoxypropyl stearate	0.00210791	0.00165111	0.0030369	0.00256031	0.000867111	0.00116958	0.00144645	0.00244144	0.00145369	0.00156491	0.00166457	0.00219096
2,3-Dihydro-4H-1,3,2-oxazaphosphinin-4-one	0.0213402	0.0204597	0.0203294	0.0168979	0.0195465	0.0198742	0.0139394	0.020324	0.0170699	0.0177468	0.013765	0.0176795
2,3-diketogulonate	0.0329847	0.0339776	0.0324788	0.0294552	0.067201	0.0684794	0.047109	0.0444443	0.0326572	0.0338932	0.0282151	0.0459184
2,3-Secoporrigenin	0.00955537	0.0184969	0.0123507	0.0131608	0.0129431	0.0134681	0.010294	0.01908	0.0221681	0.0214568	0.00944886	0.0125055
2,4,12-Octadecatrienoic acid isobutylamide	0	0.00118186	0.0027138	0.00251086	0.00261343	0.00156598	0.00241325	0.00366216	0.00200269	0.00238898	0.00208457	0.00325246
2,4,5-trihydroxy-5-(methylamino)-3,4-diphenylpentanoic acid	0.0162723	0.0147543	0.0190471	0.0123973	0.0141913	0.00877443	0.033423	0.0277035	0.0129233	0.0102631	0.0124356	0.00624333
2,4,6-Tri([1~1~,2~1~:2~4~,3~1~-terphenyl]-1~4~-yl)pyridine	0	0.00132408	0.00416938	0.00349407	0.00222469	0.00180017	0.00206059	0.00468238	0.00324162	0.0015055	0.00191915	0.00321692
2,4,6-Tris(4-isocyanato-3-pentadecylphenoxy)-1,3,5-triazine	0.00332408	0.00358355	0.0032368	0.00349278	0.00402175	0.00344664	0.00329118	0.00343434	0.00400301	0.00328022	0.0033043	0.00328954
2,4,6-Tris(4-nitro-3-pentadecylphenoxy)-1,3,5-triazine	0.00251926	0.00272962	0.000934301	0.00151159	0.00087097	0.00153892	0.00278084	0.00240356	0.000955692	0.00286493	0.00132771	0.00180182
2,4,6-Tris(dodecylsulfanyl)-1,3,5-triazine	0.0316288	0.025196	0.0285008	0.0227794	0.0246836	0.0257229	0.0266196	0.0244511	0.0248017	0.0216154	0.0289497	0.0272293
2,4,7,12-Tetraazatridecan-13-oic acid, 10-hydroxy-2,5-dimethyl-1-(2-(1-methylethyl)-4-oxazolyl)-3,6-dioxo-8,11-bis(phenylmethyl)-, 5-thiazolylmethyl ester, (5S-(5R*,8R*,10R*,11R*))-	0.0325188	0.0272922	0.0194206	0.0252024	0.0242848	0.025543	0.0234067	0.0218097	0.0191229	0.0126111	0.0210325	0.0300882
2,4-Bis(benzoyloxy)-1,1-bis(ethylsulfanyl)-5-(triphenylmethoxy)pentan-3-yl benzoate (non-preferred name)	0.121148	0.1621	0.394175	0.314143	0.187169	0.173274	0.370137	0.154233	0.144955	0.557436	0.392692	0.297548
2,4-Diamino-6-hydroxypyrimidine	0.00491193	0.00510868	0.00519409	0.00483767	0.0043225	0.00892276	0.0139469	0.00459277	0.00284594	0.00275459	0.0144318	0.00286442
2,4-Dinitrophenylprolyl-leucyl-glycyl-leucyl-tryptophyl-alanyl-argininamide	0.00744849	0.00667753	0.0041794	0.00568347	0.00662263	0.00729951	0.00418161	0.00467182	0.00447413	0.00380765	0.00448091	0.00623768
2,5,9,12-Tetraaza-7-phosphatridecanedioic acid, 7-hydroxy-3,11-bis(1-methylethyl)-4,10-dioxo-6,8-bis(phenylmethyl)-, bis(phenylmethyl) ester, 7-oxide, (3S-(3R*,6R*,8S*,11R*))-	0.0669397	0.0679512	0.110874	0.0975513	0.0169765	0.0372193	0.0316366	0.0606808	0.0501825	0.0791506	0.0782326	0.0611008
2,5-Anhydro-1-O-sulfo-3-O-(2-O-sulfo-alpha-L-idopyranuronosyl)-D-mannitol	0.0147725	0.015627	0.0122716	0.0122573	0.0130053	0.0115592	0.0127799	0.0104757	0.00972099	0.00814613	0.00867027	0.0104403
2,5-Bis(8-butoxy-2,6-dimethyloctan-2-yl)benzene-1,4-diol	0.0457314	0.0412152	0.0279745	0.0298763	0.026217	0.0393648	0.0308085	0.0290744	0.0230139	0.0266199	0.0240308	0.0292773
2,6-Anthracenedisulfonic acid, 9,10-dihydro-1,5-dihydroxy-4,8-dinitro-9,10-dioxo-, disodium salt	0.00705153	0.026747	0.00824123	0.00891158	0.00842528	0.00868234	0.00451281	0.0242987	0.0173445	0.0119675	0.00591533	0.00547757
2,6-Bis{2-[3,4,5-tris(dodecyloxy)phenyl]ethenyl}pyridine	0.00621072	0.00538654	0.0029182	0.00567008	0.00298598	0.00688076	0.00643013	0.00300377	0.00521091	0.00393138	0.00337791	0.00482228
2,6-Dicyclohexyl-1,4-diethyl-1,4-dihydropyridine-3,5-dicarboxylate	0.0271955	0.0256527	0.0185009	0.0152771	0.0146807	0.0177918	0.0179528	0.0225912	0.0213884	0.0257176	0.0166917	0.0319894
2,6-ditert-butyl-4-[[4-[(3,5-ditert-butyl-4-oxocyclohexa-2,5-dien-1-ylidene)-sulfanylmethyl]piperazin-1-yl]-sulfanylmethylidene]cyclohexa-2,5-dien-1-one	0.147037	0.125606	0.140405	0.173308	0.257737	0.249805	0.272527	0.150688	0.171666	0.173797	0.178447	0.191704
2',7-Dihydroxy-4'-methoxy-8-prenylflavan 2',7-diglucoside	0.0282418	0.0314915	0.0222911	0.028096	0.0144823	0.0175405	0.0193186	0.0134332	0.00470568	0.00147197	0.00329999	0.00392869
2,7-Naphthalenedisulfonic acid, 5-amino-3-[[4'-[(7-amino-1-hydroxy-3-sulfo-2-naphthalenyl)azo][1,1'-biphenyl]-4-yl]azo]-4-hydroxy-, disodium salt	0.0012415	0.00352977	0.00591564	0.00470215	0.00173301	0.00181631	0.00243171	0.00580312	0.00614027	0.00347413	0.00516174	0.00678414
2,7-Naphthalenedisulfonic acid, 5-amino-4-hydroxy-3-[[4'-[(2-hydroxy-3,6-disulfo-1-naphthalenyl)azo]-3,3'-dimethoxy[1,1'-biphenyl]-4-yl]azo]-, tetrasodium salt	0.00665465	0.00498141	0.00861961	0.00364547	0.00899474	0.00312119	0.00743867	0.0178657	0.00891708	0.0119149	0.00124816	0.00296025
2,8-Dihydroxyquinoline-beta-D-glucuronide	0.0145674	0.00899698	0.000290961	0.00367599	0.00810948	0.00943627	0.0131835	0.022447	0.0104702	0.014851	0.0112114	0.0209384
2-[(4,5-Dihydro-1H-imidazol-2-yl)sulfanyl]-1H-imidazole-4,5-dicarbonitrile	1.65865	2.25433	1.78181	1.9888	2.2744	1.67352	1.90649	1.80098	2.58705	2.63881	2.04381	2.23802
2-[(Methylthio)methyl]-2-butenal	0.00782282	0.00866346	0.00801699	0.00768247	0.00868171	0.00882291	0.00538188	0.0111918	0.00600562	0.00790359	0.00610403	0.00784169
2-[3-(sulfooxy)phenyl]acetic acid	0.0231841	0.0517821	0.0209225	0.0181401	0.0414778	0.045943	0.0512459	0.0238766	0.00941281	0.0178033	0.041834	0.0206874
2-{[(3,4-dihydroxy-5-methoxyphenyl)(hydroxy)methylidene]amino}acetic acid	0.00988976	0.018935	0.0103822	0.0152126	0.0106958	0.00988336	0.0151846	0.0101584	0.0125976	0.00888682	0.0109179	0.0125414
20-(Isononylphenoxy)-3,6,9,12,15,18-hexaoxaicosan-1-ol	0.0791651	0.107294	0.0992451	0.0877608	0.0666607	0.0691947	0.0664049	0.084905	0.0849774	0.102503	0.0754395	0.0955856
24-Acetyl- 25-cinnamoylvulgaroside	0.126668	0.117268	0.0764292	0.0963824	0.105128	0.104525	0.0855674	0.0923886	0.0699466	0.0531195	0.0933909	0.112043
26-Desglucoavenacoside A	0.00934448	0.00951451	0.0104958	0.0164674	0.00855787	0.0111464	0.00823228	0.0124593	0.00875766	0.01203	0.00782299	0.00683089
26-Glucosyl-1,3,11,22-tetrahydroxyergosta-5,24-dien-26-oate	0.242993	0.181744	0.136149	0.177746	0.23964	0.235027	0.24913	0.19352	0.263156	0.223688	0.224843	0.513158
27-Norcholestanehexol	0.00176892	0.00216069	0.00336936	0.00219115	0.00269448	0.00233151	0.00312956	0.00241159	0.00318393	0.00215112	0.00381851	0.00414884
29-(Isooctylphenoxy)-3,6,9,12,15,18,21,24,27-nonaoxanonacosanol	0.00344706	0.0032586	0.00320455	0.00304506	0.00361292	0.00319024	0.00295536	0.00444399	0.00286463	0.001739	0.00185099	0.00389975
2-Acetylthiazole	0.00697681	0.0149323	0.0142152	0.025001	0.0175534	0.0151913	0.0130205	0.0163739	0.020153	0.0182127	0.0109922	0.0118947
2alpha,6-Dimethyl-3,20-dioxopregna-4,6-dien-17-yl acetate	0.00749432	0.00691381	0.00600564	0.00372682	0.00680481	0.010768	0.00891352	0.0108128	0.00850737	0.00965833	0.00715403	0.0127769
2-amino-4-({1-[(carboxymethyl)-C-hydroxycarbonimidoyl]-2-[(1-hydroxy-2,4-diphenylbutan-2-yl)sulfanyl]ethyl}-C-hydroxycarbonimidoyl)butanoic acid	0	0	0.00273018	0.00286439	0.00326591	0.00162323	0.00316125	0.00636393	0.00214729	0.00209752	0.00337741	0.00456281
2-amino-4-({1-[(carboxymethyl)-C-hydroxycarbonimidoyl]-2-[(4-{3,5-dihydroxy-2,2-dimethyl-8-oxo-6-propyl-2H,3H,4H,8H-pyrano[3,2-g]chromen-10-yl}-4-oxobutyl)sulfanyl]ethyl}-C-hydroxycarbonimidoyl)butanoic acid	0.0119053	0.00618016	0.00679437	0.0055775	0.00468039	0.00819562	0.0160298	0.00449236	0.00370385	0.00270234	0.0139965	0.0029949
2-amino-4-({1-[(carboxymethyl)-C-hydroxycarbonimidoyl]-2-[(4-{3-[2-(2,4-dihydroxyphenyl)-2-oxoethyl]-4,6-dihydroxy-2-methoxyphenyl}-3-hydroxy-2-methylbutan-2-yl)sulfanyl]ethyl}-C-hydroxycarbonimidoyl)butanoic acid	0.00570062	0.00300329	0.00341953	0.00253864	0.00218788	0.00420009	0.00739004	0.00220414	0.00204313	0.00146891	0.00704961	0.0015373
2-amino-4-({2-[(1-carboxy-1-hydroxy-2-methylpropan-2-yl)sulfanyl]-1-[(carboxymethyl)-C-hydroxycarbonimidoyl]ethyl}-C-hydroxycarbonimidoyl)butanoic acid	0.0179123	0.0143656	0.0128719	0.0115703	0.00920338	0.0250966	0.0403968	0.0107162	0.00642599	0.00513236	0.0423038	0.00530544
2-Aminomuconic acid semialdehyde	0.00505498	0.00507635	0.00315741	0.0021848	0.00333059	0.00388251	0.00268984	0.00367725	0.00696408	0.00819057	0.00407703	0.00547054
2'-Apo-beta-carotenal	0.0262986	0.0239903	0.0281132	0.0218759	0.0121141	0.0148046	0.0161762	0.0229608	0.0184382	0.023499	0.0182605	0.0241263
2-Arachidonoylglycerophosphocholine	0.130679	0.133444	0.129076	0.134095	0.144157	0.133186	0.136446	0.132649	0.158803	0.173944	0.172073	0.184186
2-Cyanopropan-2-yl dodecyl carbonotrithioate	0.00471518	0.00287789	0.00280646	0.00332423	0.00335625	0.00470858	0.004667	0.00417261	0.00266375	0.00487301	0.003959	0.00283309
2-deoxy-20-hydroxy-5alpha-ecdysone 3-acetate	0.162715	0.160915	0.165334	0.187793	0.172482	0.17206	0.194235	0.193361	0.203919	0.197635	0.205509	0.19983
2-Deoxyglucose	0.0085556	0.00626329	0.00703355	0.00753969	0.0070606	0.00829422	0.00495728	0.00723013	0.00500937	0.00506967	0.00458544	0.00644875
2-Furancarboxaldehyde	0.0081204	0.0116435	0.00887657	0.00600751	0.00569338	0.0102167	0.00260167	0.0100778	0.015172	0.0221544	0.017713	0.0223047
2-Furoic acid	0.130543	0.114731	0.105785	0.101526	0.163639	0.171365	0.126373	0.0999097	0.0620118	0.076812	0.0564203	0.095203
2-Hydroxy-3,6,9,12,15,18-hexaoxaicos-1-yl undec-1-enoate	0.000704087	0.00600604	0.000966987	0.00858366	0.006891	0.00742536	0.00845239	0.00637916	0.00810495	0.0130964	0.018591	0.0180216
2-Hydroxy-3-methylpentanoic acid	0.0257163	0.0238175	0.0331182	0.0555913	0.0240406	0.0380314	0.209461	0.0412054	0.0262833	0.0236565	0.0203634	0.0264784
2-hydroxyacrylic Acid	0.014419	0.0128616	0.0122986	0.0144537	0.0055502	0.0109471	0.00339491	0.0208581	0.0182769	0.0267167	0.0230229	0.0217376
2-Hydroxybutyric acid	0.658551	0.351802	0.388501	0.383907	0.477096	0.948315	0.428369	0.798609	0.63242	1.1697	0.28409	0.400438
2-Hydroxyethanesulfonate	0.019161	0.0181084	0.0185587	0.0243442	0.0393196	0.0312923	0.0188333	0.0234777	0.0235548	0.0475628	0.0293209	0.0274174
2-Hydroxymyristic acid	0.0395513	0.0327887	0.0504027	0.0715516	0.0302523	0.0604287	0.0480949	0.0750884	0.0337852	0.0324477	0.0344528	0.0600236
2-Hydroxypropane-1,2,3-tricarboxylic acid--piperazine--water (2/3/5)	0.0283034	0.0338662	0.0126968	0.0136895	0.0194358	0.0178986	0.0278687	0.0190342	0.0130247	0.00652207	0.00958493	0.0179312
2-Hydroxystearic acid	0.0192825	0.0262384	0.0162066	0.0173561	0.022091	0.0182246	0.0154826	0.0153585	0.0157279	0.0111894	0.0100181	0.0175361
2-isopropylaminoethylamine	0.0015758	0.0120145	0.00178578	0.0025576	0.00412129	0.0116438	0.00265801	0.00210327	0.0109843	0.00998217	0.0117163	0.00205205
2-Ketobutyric acid	0.0151071	0.0144997	0.0084183	0.00895114	0.0156606	0.0225649	0.0127643	0.0192567	0.013294	0.029853	0.0110095	0.0113897
2-linoleoyl-sn-glycero-3-phosphocholine	7.60457	7.81455	7.31937	7.67309	6.29691	6.25138	7.06755	7.55818	7.95653	7.58223	8.26062	7.4287
2-Methoxyestradiol-3-methylether	0.00374143	0.00154545	0.00100431	0.0022076	0.00213836	0.00226859	0.00123893	0.00190246	0.00176093	0.00120747	0.00141156	0.00138934
2-Methyl-1-[(propan-2-yl)phosphanyl]propan-1-imine	0.00537174	0.00664478	0.00602033	0.00604438	0.00584192	0.00707105	0.00628907	0.00743125	0.00740241	0.0062756	0.00451716	0.0066248
2-Methyl-2-cyclopenten-1-one	0.00773527	0.00823265	0.00707345	0.00680754	0.00657701	0.00602339	0.00681395	0.00708213	0.00706633	0.00756234	0.00554462	0.00765596
2-Methyl-3-ketovaleric acid	0.270258	0.373329	0.214861	0.300824	0.513423	0.523111	0.366626	0.281449	0.336143	0.185409	0.116204	0.2345
2-Methyl-4-propyl-1,3-oxathiane	0.0292549	0.0320851	0.02304	0.0241342	0.0200998	0.022	0.0235658	0.0255637	0.0243069	0.0274593	0.019494	0.027248
2-Methyl-7-nitro-1-thia-4a,9-diaza-fluoren-4-one	0.0125592	0.00815979	0.0110469	0.00713892	0.00881443	0.0181055	0.00936698	0.0107848	0.0096716	0.0144694	0.00833214	0.0054777
2-Methylbutyroylcarnitine	0.00607475	0.00671586	0.00656821	0.00788171	0.00864477	0.00751361	0.0149375	0.0153118	0.0060016	0.0062584	0.00319424	0.0102141
2-Methylbutyrylglycine	0.0856773	0.0600453	0.0558427	0.0979287	0.0914271	0.114925	0.0909801	0.0950839	0.0671331	0.0546588	0.033726	0.0616685
2-Methylfuran	0.00305196	0.00232381	0.00290351	0.00152412	0.000848758	0.000724903	0.00596493	0.00160051	0.000505228	0.00130758	0.000841497	0.00139368
2-Methylglutaric acid	0.067708	0.131384	0.127542	0.0829989	0.0205855	0.0733144	0.0282393	0.172424	0.101924	0.0746243	0.0933705	0.132226
2-Naphthalenecarboxamide, N-[4-[2,4-bis(1,1-dimethylpropyl)phenoxy]butyl]-1-hydroxy-4-(4-nitrophenoxy)-	0.00781867	0.00692681	0.0106694	0.00998066	0.0115337	0.0113486	0.0113916	0.011721	0.0125314	0.0106855	0.00954674	0.0122808
2-Naphthalenecarboxamide, N-[4-[2,4-bis(1,1-dimethylpropyl)phenoxy]butyl]-1-hydroxy-4-[[(4-nitrophenyl)sulfonyl]amino]-	0.100677	0.0941182	0.0636579	0.0790607	0.0864014	0.0843605	0.0711086	0.0733144	0.0596296	0.0444141	0.0770465	0.095644
2-Naphthalenesulfonic acid, 7-amino-4-hydroxy-3-[[2-methoxy-4-[(3-sulfophenyl)azo]phenyl]azo]-, compd. with 2,2',2''-nitrilotris[ethanol] (1:2)	0.00666708	0.00380019	0.00845334	0.00291201	0.00916729	0.00412648	0.00666428	0.0170511	0.00766737	0.0108844	0.00102776	0.00383866
2-Octatriacontyloxirane	0	0.00374477	0	0	0.0594249	0.00920727	0.00906816	0.000816384	0.00855449	0.000603718	0.00160877	0.00200206
2-Octenedioic acid	0.0043954	0.00555839	0.00352869	0.00469142	0.00528036	0.0130873	0.00456882	0.00702735	0.00574178	0.00373897	0.0233951	0.00793297
2-Oleoylglycerophosphocholine	0.550812	0.572646	0.500215	0.474278	0.444633	0.488328	0.439055	0.612141	0.521902	0.357749	0.393826	0.63057
2-oleoyl-sn-glycero-3-phosphocholine	5.38998	4.9636	4.84136	4.76969	5.09168	4.95875	4.5044	5.50914	4.3872	3.94315	5.23406	5.32245
2-O-p-Coumaroylhydroxycitric acid	0.00386066	0.00178372	0.00223105	0.0019192	0.00170984	0.00362528	0.0039147	0.00164903	0.00141393	0.000631583	0.00696703	0.00115538
2-O-Protocatechuoylalphitolic acid	0.000360882	0.000605842	0.00125804	0.000283278	0.000589222	0.000847238	0.00135819	0.000439846	0.00141925	0.000729382	0.00127664	0.00192396
2-Oxa-5,8,14-triazapentadecan-15-oic acid, 10-(1,3-benzodioxol-5-ylmethyl)-12-hydroxy-7-(1-methylethyl)-6,9-dioxo-13-(phenylmethyl)-, 1,1-dimethylethyl ester, (7S-(7R*,10S*,12R*,13R*))-	0.0554547	0.047244	0.0586477	0.060866	0.0812102	0.073307	0.0503004	0.0722053	0.0681685	0.0548622	0.062207	0.0663088
2-oxo-3-[4-(sulfooxy)phenyl]propanoic acid	0.022399	0.031165	0.0281468	0.0306743	0.0377269	0.0254779	0.0290329	0.0288914	0.0410638	0.0360453	0.0343857	0.0324958
2-Oxoarginine	0.00170606	0.00158981	0.0016091	0.00197579	0.00133983	0.00187235	0.00173362	0.00150654	0.00158949	0.00189069	0.0024499	0.00225402
2-Pentadecylthiomorpholin-3-one	0.0120236	0.0311473	0.0152973	0.0213702	0.0227399	0.0162747	0.036288	0.0150263	0.0129281	0.0275381	0.0243453	0.0208978
2-Piperidinone	0.000863817	0.00776548	0.00684269	0.00563659	0.00115666	0.000603497	0.00171657	0.000829158	0.00245846	0.00397083	0.00167759	0.000958741
2S,3R-didecanoyl-docosane-2,3-diol	0.0152067	0.0221593	0.0215818	0.0326866	0.020545	0.0238179	0.0163052	0.0190817	0.0180356	0.0229603	0.0158831	0.0158706
2S-aminohexadecanoic acid	0.00707175	0.0068926	0.00726223	0.00645875	0.00720745	0.00683355	0.00714432	0.0073081	0.00799556	0.00677736	0.00688169	0.00762262
3-(1,1-Dimethyl-2-propenyl)-8-(3-methyl-2-butenyl)xanthyletin	0.00397025	0.00292095	0.00338985	0.00451016	0.00336507	0.00483945	0.00731095	0.00674465	0.00489175	0.00428351	0.00581975	0.00379667
3-(3,7-dihydroxy-5-sulfino-3,4-dihydro-2H-1-benzopyran-2-yl)benzen-1-olate	0.0290445	0.00700618	0.00948043	0.0139294	0.0172177	0.0269027	0.0715955	0.00926455	0.00342771	0.00460355	0.00805199	0.0129138
3-(4-hydroxyphenyl)-1-[2,4,6-trihydroxy-3,5-bis(3-methylbut-2-en-1-yl)phenyl]propan-1-one	0.0506987	0.0223239	0.0419129	0.0345191	0.0305827	0.0243069	0.01657	0.0753013	0.0126299	0.0120407	0.0122427	0.0139974
3-(4-Methyl-3-pentenyl)thiophene	0.0710599	0.0779913	0.0733683	0.0779794	0.0779583	0.0838226	0.0831018	0.0946759	0.0859261	0.0797125	0.0637118	0.0790252
3-(Decyloxy)-6-{[4-(heptyloxy)anilino]methylidene}cyclohexa-2,4-dien-1-one	0.0369012	0.0447468	0.0290142	0.0104023	0.0215573	0.014508	0.0112192	0.014713	0.0354723	0.0184461	0.016281	0.0122806
3-(dipentylamino)-1-(4-methoxynaphthalen-1-yl)-2,2-dimethylpropan-1-ol	0	0	0.00142422	0.00194361	0.00251624	0.000586948	0.00189354	0.00570142	0.00083413	0.00305458	0.00174711	0.00358658
3-(Methoxycarbonyl)-4-oxo-1,4-dihydroquinoline-2-carboxylate	0.00256668	0.0166427	0.00157688	0.000962431	0.00208798	0.00505755	0.00194588	0.00546649	0.00352414	0.00523354	0.00382836	0.0032112
3, 5-Tetradecadiencarnitine	0.0048236	0.00368106	0.00468162	0.00343977	0.0032714	0.00562523	0.00523654	0.0127596	0.00529791	0.00673407	0.00528841	0.00606391
3,3,4-Trimethyldecane	0.00543802	0.00303775	0.00389814	0.00519431	0.00885649	0.00744046	0.00732912	0.00566685	0.00479148	0.00631035	0.00516722	0.00606245
3,3'-[(E)-Diarsene-1,2-diyl]dipyridine	0.0786743	0.0859549	0.080365	0.0782761	0.079495	0.0832921	0.0748185	0.0892999	0.0916241	0.0967514	0.0957992	0.100599
3,3-Bis(4-hydroxyphenyl)-4-(octadecyloxy)-2-benzofuran-1(3H)-one	0.121597	0.142956	0.11525	0.124325	0.117086	0.115666	0.122215	0.145568	0.183194	0.146201	0.175166	0.207687
3,4,5-trihydroxy-6-({5-hydroxy-11-methoxy-16,18-dioxo-6,8,19-trioxapentacyclo[10.7.0.0?,?.0?,?.0??,??]nonadeca-1(12),2(9),10,13(17)-tetraen-4-yl}oxy)oxane-2-carboxylic acid	0.00425367	0.00208136	0.00060222	0.00170603	0.000421546	0.000315302	0.004672	0	0.000230362	0	0.000291302	0
3,4,5-trihydroxy-6-(3-{3,5,7-trihydroxy-6-[3,4,5-trihydroxy-6-(hydroxymethyl)oxan-2-yl]-3,4-dihydro-2H-1-benzopyran-2-yl}phenoxy)oxane-2-carboxylic acid	0	0.00151876	0.00407671	0.00333444	0.00342864	0.00359222	0.00990251	0.00562491	0.00102475	0.000916962	0.00938239	0.00323503
3,4,5-trihydroxy-6-{[4-(7-methoxy-2-oxo-2H-chromen-6-yl)butan-2-yl]oxy}oxane-2-carboxylic acid	0.0124028	0.0101604	0.00874407	0.00789765	0.00575925	0.0174939	0.027343	0.00765215	0.00431968	0.00357017	0.0291084	0.00378796
3,4,5-trihydroxy-6-{[4-hydroxy-7-methoxy-2,2-dimethyl-6-(3-phenylpropanoyl)-3,4-dihydro-2H-1-benzopyran-5-yl]oxy}oxane-2-carboxylic acid	0.0088715	0.00298467	0.00369897	0.00284453	0.00268757	0.00636536	0.010103	0.00330877	0.00168378	0.00127615	0.00943955	0.00104215
3,4,5-trihydroxy-6-{[8-(2-hydroxypropan-2-yl)-4-(1-hydroxypropyl)-2-oxo-2H,8H,9H-furo[2,3-h]chromen-5-yl]oxy}oxane-2-carboxylic acid	0.00450457	0.017921	0.000977645	0.00138155	0.00138381	0.0040696	0.014532	0.00450831	0.00144112	0.00195038	0.00262978	0.00326824
3,4,5-trihydroxy-6-{2-hydroxy-4-[(1E)-3-oxo-3-[(3,4,5,6-tetrahydroxyoxan-2-yl)methoxy]prop-1-en-1-yl]phenoxy}oxane-2-carboxylic acid	0.00641259	0.00211618	0.00269487	0.00188115	0.00168352	0.0040412	0.00755159	0.00203682	0.00124529	0.000672506	0.00644229	0.000807186
3,4,5-trihydroxy-6-{4-[3-(5-hydroxy-2,2-dimethyl-2H-chromen-6-yl)prop-2-enoyl]phenoxy}oxane-2-carboxylic acid	0.00230113	0.000430207	0.000915651	0.000694052	0.000473052	0.00136459	0.00232586	0.000726267	0.000112353	0.000226732	0.00214405	0.000174118
3,4-Dimethyl-5-pentyl-2-furandecanoic acid	0.00698459	0.0083879	0.00910239	0.00835736	0.00405757	0.00412118	0.00614918	0.0109625	0.00592442	0.00864477	0.00765576	0.00659047
3,6,9,12,15,18,21,24,27,30,33-Undecaoxapentatetracontan-1-ol	0.00251342	0.00405343	0.0031265	0.00443106	0.00320587	0.00288443	0.00256454	0.0028201	0.00291779	0.0033465	0.0030849	0.0028448
3,6,9,12,15,18,21,24,27,30-Decaoxatetratetracontan-1-ol	0.00489926	0.0044481	0.00586048	0.00656671	0.00673938	0.00508783	0.00531567	0.00661562	0.00558208	0.0057437	0.00576019	0.00693676
3,6,9,12-Tetraoxahexadecan-1-ol, 15-methyl-, hydrogen phosphate	1.14008	1.15047	1.00064	0.969191	1.01437	1.06198	0.953871	1.29723	1.05012	0.737647	0.736652	1.31875
3,6,9-Trioxa-12-azatetracosan-1-ol	0.0107391	0.00469628	0.00523019	0.0135605	0.0069815	0.0151163	0.00639512	0.0102117	0.00532113	0.00844202	0.0204522	0.0131471
3,6-Bis[2-(2-hydroxy-3,5-disulfophenyl)hydrazinylidene]-4,5-dioxo-3,4,5,6-tetrahydronaphthalene-2,7-disulfonic acid	0.00705568	0.00996735	0.0124149	0.0101352	0.00852472	0.00886293	0.0126997	0.0120382	0.01507	0.0355274	0.0279424	0.0222268
3,6-Epoxy-5,5',6,6'-tetrahydro-b,b-carotene-3',5,5',6'-tetrol	0.0119668	0.016729	0.0138678	0.0142119	0.0148637	0.0137108	0.0152355	0.0135533	0.0123947	0.014767	0.0134433	0.013779
3,9-Diethyl-5,11-bis(4-octylphenyl)-5,11-dihydroindolo[3,2-b]carbazole	0.011723	0.0172623	0.010901	0.0108811	0.00995938	0.00584093	0.00479602	0.00703225	0.00671407	0.00586301	0.00638183	0.00291339
3-[3-(Sulfooxy)phenyl]propanoic acid	0.0205107	0.00927496	0.0259909	0.0105559	0.0055155	0.00911315	0.0184426	0.00842961	0.0189255	0.0259564	0.0184431	0.0242814
3-[4-methoxy-3-(sulfooxy)phenyl]propanoic acid	0.12615	0.14242	0.127556	0.112493	0.0233455	0.110307	0.318652	0.133844	0.202872	0.285094	0.073189	0.101421
33-Deoxy-33-hydroperoxyfurohyperforin	3.31924	3.23285	2.91156	3.01058	3.217	3.1735	2.95339	3.41638	2.98797	2.51981	3.12471	3.61329
35-aminobacteriohopane-32,33,34-triol	0	0	0.00134564	0.00181987	0.00567336	0.000614861	0.00208691	0.00126267	0.000221183	0.00177964	0.00242762	0.00286068
3a,20b-Pregnanediol	0.00233239	0.00246112	0.00499153	0.00433323	0.00377714	0.00323277	0.00353239	0.00512814	0.00479419	0.00443065	0.00542158	0.00495088
3a,7a,12b-Trihydroxy-5b-cholanoic acid	0.0434674	0.199441	0.0112685	0.01058	0.126563	0.0536361	0.0184111	0.125502	0.0574503	0.000722839	0.0516131	0.286598
3a,7a-Dihydroxy-5b-cholestane	0.0104229	0.00685011	0.0094492	0.0106276	0.0127748	0.0183895	0.0145256	0.0445804	0.0261932	0.0323745	0.0254021	0.0275647
3alpha-Acetomethoxy-11alpha-oxo-12-ursen-24-oic acid	0.0362412	0.044851	0.0539481	0.0482556	0.0384229	0.0354891	0.0397505	0.0536829	0.0556524	0.045516	0.0501733	0.0506316
3b,15b,17a-Trihydroxy-pregnenone	0.00343502	0.00352603	0.00555171	0.00499133	0.00456268	0.00449453	0.0118385	0.00593848	0.00502088	0.00753184	0.00623223	0.00397953
3b-Allotetrahydrocortisol	0.00473412	0.00640236	0.00862593	0.0101067	0.0079567	0.014691	0.00931327	0.0241261	0.00842828	0.00862777	0.00659345	0.0151168
3beta,15alpha-Diacetoxylanosta-8,24-dien-26-oic acid	0.31548	0.466386	0.299468	0.305488	0.216706	0.262979	0.272116	0.307685	0.339435	0.22032	0.152904	0.235946
3beta-Acetoxy-19alpha-hydroxy-12-ursene	0.000161986	0.000626289	0	0.000786613	0.000699935	0.00075137	0.00080757	0.000636122	0.000687284	0.000705005	0.00056688	0.000626513
3-demethylubiquinol-10	0.00285249	0.00306582	0.00495039	0.00396156	0.00653919	0.00499644	0.00296532	0.00702967	0.00525276	0.00498397	0.00372076	0.00466046
3-Furoic acid	0.00858645	0.0114891	0.0107247	0.0114277	0.00914199	0.00879037	0.00819561	0.00969138	0.0108466	0.0103117	0.0140384	0.00945794
3H-1,3-Benzazaphosphole	0.00610293	0.0169149	0.00658416	0.00548049	0.0194496	0.0112889	0.00839106	0.00643443	0.00575633	0.00163018	0.00438678	0.00971738
3-Hexaprenyl-4-hydroxybenzoic acid	0.00139021	0.00471991	0.00810925	0.00831254	0.00898685	0.00743913	0.00777012	0.00863243	0.00732707	0.00772348	0.00806958	0.00870131
3-Hexenedioic acid	0.0055684	0.00893587	0.0130977	0.0078991	0.00540628	0.00496884	0.0126876	0.0202026	0.028706	0.0231956	0.0151359	0.0133781
3-Hydroxy-10'-apo-b,y-carotenal	0.000861133	0.000955091	0.00192823	0.00133144	0.000881502	0.000987608	0.00135908	0.000987773	0.00144776	0.000883754	0.00179782	0.00175867
3-Hydroxy-11Z-octadecenoylcarnitine	0.00559823	0.00306364	0.0036066	0.00619815	0.00438261	0.00628024	0.00463428	0.0109981	0.00553585	0.00624256	0.00436585	0.00582162
3-hydroxy-2-methyl-2-[(sulfooxy)methyl]propanoic acid	0.0580941	0.0296673	0.0120066	0.0277029	0.0216866	0.0307108	0.0655258	0.0293535	0.013761	0.0135954	0.00983743	0.0303994
3-Hydroxy-6,8-dimethoxy-7(11)-eremophilen-12,8-olide	0.0250121	0.0182484	0.0309968	0.0240808	0.0191717	0.0263143	0.0238992	0.0403363	0.0154725	0.0231804	0.0226639	0.0299747
3-Hydroxybutyrylcarnitine	0.0170479	0.0166606	0.0123996	0.0127273	0.0151525	0.0224512	0.0141768	0.0242829	0.0108499	0.0148792	0.0102136	0.0229682
3-hydroxydecanoyl carnitine	0.00163175	0.00182843	0.00310261	0.00359494	0.000692346	0.00199918	0.00109858	0.00249267	0.00192971	0.00224314	0.00286555	0.00204124
3-Hydroxyhexadecanoylcarnitine	0.00280151	0.00148022	0.0020323	0.00514216	0.00207473	0.00326353	0.00304948	0.0051682	0.00317758	0.00230084	0.00198773	0.00348552
3-Hydroxyisovalerylcarnitine	0.00435757	0.00457432	0.00480982	0.00465342	0.00487866	0.00472769	0.00809042	0.0103762	0.00491409	0.00572341	0.00492529	0.00635924
3-Hydroxysebacic acid	0.0148129	0.0114451	0.0169807	0.0210567	0.00982072	0.00869954	0.0161859	0.0308791	0.0119303	0.033833	0.0170016	0.00553233
3-Hydroxysintaxanthin	0.0212459	0.0233357	0.0153872	0.0190428	0.018357	0.0193954	0.0145178	0.0134094	0.0141756	0.0112236	0.0146653	0.019913
3-Isoquinolinecarboxamide, 2-(3-((2-(acetylamino)-1-oxo-3-(8-quinolinylsulfonyl)propyl)amino)-2-hydroxy-4-phenylbutyl)-N-(1,1-dimethylethyl)decahydro-, (3S-(2(2S*,3R*(R*)),3a,4ab,8ab))-	0.161894	0.154263	0.138933	0.114725	0.156827	0.152148	0.15273	0.0987158	0.178767	0.141217	0.203208	0.27655
3-keto Fusidic acid	0.0518907	0.0513086	0.0469985	0.0425928	0.048646	0.0489817	0.0462665	0.0584308	0.0503632	0.0363486	0.035759	0.0623249
3-keto-Digoxigenin	0.565878	0.515088	0.848651	0.550569	0.197789	0.555403	0.65711	0.675296	0.301383	0.621678	0.533937	0.720926
3-Mercaptohexyl hexanoate	0.00202369	0.0023384	0.00245427	0.00202051	0.0035244	0.00323199	0.0055102	0.00590067	0.00235083	0.00185194	0.00316272	0.00419187
3'-Methoxyfukiic acid	0.00996445	0.00792868	0.0106283	0.0111041	0.00821739	0.00729187	0.00974306	0.00860441	0.00815994	0.00702912	0.017766	0.00512194
3-Methyl-3-butenyl apiosyl-(1->6)-glucoside	0.725203	0.845136	0.754123	0.596831	0.60081	0.674768	0.647053	1.54453	0.751009	1.01934	0.766744	1.01372
3-Methyl-5-pentyl-2-furanpentadecanoic acid	0.000565922	0.00160205	0.00262228	0.00227365	0.00219435	0.00165912	0.00363228	0.00218805	0.00214324	0.0029167	0.00227641	0.00235154
3-Methylcrotonylglycine	0.0458721	0.0280756	0.0191064	0.0813847	0.0249978	0.0504688	0.0317138	0.0588625	0.0219099	0.028517	0.0133222	0.0250534
3-Methylthiopropionic acid	0.00183751	0.0021074	0.00241335	0.00264414	0.00257953	0.00291646	0.00250089	0.00249095	0.00226009	0.00230885	0.00268845	0.00215404
3'-N-Acetyl-4'-O-(14-methylpentadecanoyl)fusarochromanone	0.0850816	0.103221	0.0817848	0.0855432	0.0814119	0.0780739	0.0816145	0.096781	0.125127	0.0965665	0.102148	0.124116
3-Nitrophenyl phosphate	0.00143134	0.00126081	0.0014341	0.00152967	0.00262127	0.00163459	0.000885642	0.0061966	0.00205237	0.00208407	0.00193122	0.00216157
3-O-alpha-L-Arabinopyranosylproanthocyanidin A5'	0.00290543	0.00170882	0.00275129	0.00202513	0.00198548	0.00293824	0.00573247	0.00339717	0.00134221	0.000971347	0.00603872	0.00223098
3-O-cis-Coumaroylmaslinic acid	0.0276349	0.0260103	0.0252651	0.0249094	0.0172077	0.0202914	0.0195706	0.017764	0.016251	0.0140988	0.0104724	0.0141911
3-O-Feruloylquinic acid	0.101164	0.13995	0.0946425	0.112254	0.156945	0.105674	0.115813	0.0961969	0.225339	0.246794	0.149942	0.158297
3-O-Methylniveusin A	0.0329084	0.0321438	0.0176	0.0194649	0.0426283	0.045581	0.0302411	0.0165726	0.0128809	0.00957673	0.0103297	0.0182359
3-O-Sulfogalactosylceramide (d18:1/12:0)	0.00149726	0.00545201	0.00109241	0.00639991	0.00587698	0.00477344	0.00550326	0.00508568	0.00519942	0.0100761	0.0106384	0.0105777
3-Oxodecanoic acid	0.0148934	0.0153652	0.0217775	0.0237589	0.0137546	0.0101641	0.0443592	0.0169894	0.0101088	0.011688	0.0133887	0.0134371
3-Oxododecanoic acid	0.0960312	0.0953891	0.129487	0.124579	0.0752502	0.145819	0.0853841	0.211236	0.102549	0.093453	0.122885	0.148436
3-Oxohexadecanoic acid	0.0267703	0.0244064	0.0377186	0.054797	0.0271454	0.0684587	0.0423272	0.0851346	0.0302671	0.0242413	0.0246375	0.0681033
3-Oxoicosanoyl-CoA	0.00689585	0.0076628	0.00937475	0.00810449	0.0110963	0.00841364	0.00602342	0.0112671	0.00967209	0.00928771	0.00696319	0.00684797
3-Oxooctadecanoic acid	0.0254811	0.0207003	0.0136153	0.0155544	0.0250454	0.0307558	0.0206696	0.0400333	0.0185274	0.0151665	0.017473	0.047756
3-Oxotetradecanoic acid	0.126086	0.104007	0.179108	0.13138	0.0954957	0.136449	0.102417	0.245663	0.107002	0.124713	0.10599	0.135383
3-phenyl-1-[2,4,6-trihydroxy-3,5-bis(3-methylbut-2-en-1-yl)phenyl]propan-1-one	0	0.00112147	0.00259571	0.00220335	0.00237476	0.00131358	0.00230998	0.00468971	0.00178456	0.00179513	0.00242456	0.00382168
3-phenylprop-2-enoic acid	0.00603301	0.00689478	0.00644897	0.00674242	0.00714753	0.00769073	0.00636633	0.00889581	0.00833428	0.00726693	0.00569469	0.00740274
3R-aminononanoic acid	0.007323	0.00799984	0.00741358	0.00612569	0.00629191	0.00467879	0.012228	0.0133315	0.0135297	0.010608	0.0119608	0.00961089
4-(3,7-dimethylocta-2,6-dien-1-yl)-5-(6-hydroxy-1-benzofuran-2-yl)benzene-1,3-diol	0.0340827	0.0418509	0.0359095	0.0279455	0.0294932	0.0326415	0.0322851	0.0684389	0.0367467	0.0476656	0.0344844	0.0477272
4-(3-hydroxy-3-phenylpropyl)phenol	0.00204702	0.00120437	0.00177897	0.00160108	0.00190343	0.00231616	0.00118438	0.00102603	0.0018125	0.00157031	0.00198857	0.00135773
4-(3-Pyridyl)-3-butenoic acid	0.00956949	0.00866156	0.00992322	0.00968183	0.0118353	0.0102802	0.00877674	0.00812687	0.0111368	0.00939679	0.00869637	0.0108222
4-(4,8-Dimethylnonyl)-2,6-dimethyl-1-phenylpyridin-1-ium	0.00502495	0.00517628	0.00715257	0.00448043	0.00291372	0.00330625	0.0035323	0.00450408	0.00485839	0.00582697	0.0052588	0.00566386
4-(Methylnitrosamino)-1-(3-pyridyl)-1-butanol	0.0206222	0.0201935	0.0346996	0.0198278	0.00655557	0.0208111	0.0233123	0.0280324	0.00971864	0.020739	0.013336	0.0198675
4-(Nonan-5-yl)-N-[4-(nonan-5-yl)pyridin-2-yl]pyridin-2-amine	0.00536917	0.00470132	0.00710263	0.0102544	0.00766281	0.00708634	0.00685527	0.0108944	0.00802773	0.00690976	0.00956743	0.00730738
4,13,14-trihydroxy-9-oxo-8,17-dioxatetracyclo[8.7.0.0?,?.0??,??]heptadeca-1(10),2,4,6,11(16),12,14-heptaen-5-yl acetate	0.0238729	0.0169544	0.0233348	0.0135167	0.0126299	0.0182447	0.0216844	0.0324279	0.00434662	0.00849636	0.00671966	0.0163511
4,4'-Bis((4-((2-hydroxyethyl)amino)-6-(m-sulphoanilino)-1,3,5-triazin-2-yl)amino)stilbene-2,2'-disulphonic acid, sodium salt	0.00453406	0.00426413	0.00444416	0.00396047	0.00510239	0.00477864	0.00314633	0.00483938	0.00378437	0.00396805	0.00372613	0.00415135
4,4-Dimethyl-2-(tritriacontan-17-yl)-4,5-dihydro-1,3-oxazole	0.120854	0.105556	0.122333	0.098369	0.106697	0.120806	0.113365	0.110622	0.0999448	0.0964142	0.110958	0.10617
4,4'-methanediylbis(3-hydroxynaphthalene-2-carboxylic acid)- n4-(6-ethoxy-3-methylquinolin-4-yl)-n1,n1-diethylpentane-1,4-diamine(1:1)	0.08316	0.102206	0.0353082	0.042016	0.0643662	0.0534531	0.0783637	0.0548972	0.0380827	0.0264988	0.0320458	0.0544704
4,7-Didehydroneophysalin B	0.000915907	0.00360015	0.00633742	0.00542714	0.00599016	0.00492349	0.00764201	0.00954537	0.00850548	0.00701768	0.0061418	0.00814591
4-[2-(Ethylsulfanyl)-3-(hexadecyloxy)propoxy]-N,N-dimethylbutan-1-amine	0.0174904	0.0214615	0.0330983	0.0356686	0.0369555	0.0278056	0.0340772	0.0346615	0.0344504	0.0331155	0.0307506	0.0346398
4-[4,4-Bis(4-methylphenyl)buta-1,3-dien-1-yl]-N-{4-[4,4-bis(4-methylphenyl)buta-1,3-dien-1-yl]phenyl}-N-(4-methoxyphenyl)aniline	0.000528148	0.00243698	0.000605164	0.00292087	0.00325725	0.00276503	0.00230247	0.00301538	0.00314642	0.00575827	0.00600894	0.00535219
4-{1-hydroxy-3-[4-hydroxy-2-methoxy-3-(3-methylbut-2-en-1-yl)phenyl]propyl}benzene-1,2-diol	0.0331332	0.0395819	0.0290469	0.0319131	0.0282208	0.0312588	0.0259634	0.0629982	0.0306679	0.0360079	0.030471	0.0328931
4a-Formyl-5a-cholesta-8,24-dien-3b-ol	0.00165787	0.00228915	0.00190847	0.00194203	0.00211298	0.00195297	0.00198459	0.00184789	0.00229944	0.00230112	0.00248229	0.00264518
4-Amino-2-methyl-5-phosphomethylpyrimidine	0.106739	0.13561	0.107317	0.12304	0.149691	0.106859	0.11749	0.115451	0.15169	0.162174	0.131439	0.141866
4-amino-4-deoxy-alpha-L-arabinopyranosyl undecaprenyl phosphate	0.00650224	0.0045096	0.00926448	0.00314181	0.00910922	0.00301577	0.00728114	0.0174591	0.00926727	0.0109394	0.0015905	0.00389298
4-Cyanophenyl 4-(hexadecyloxy)benzoate	0.00722576	0.00724485	0.0123396	0.00998655	0.00283863	0.00462444	0.00551088	0.008006	0.00568728	0.00747752	0.00685478	0.00801942
4-Hydroxy-17beta-estradiol-2-S-glutathione	0.0033954	0.00342095	0.00213638	0.00315228	0.00346603	0.00328933	0.00262354	0.00293446	0.00218586	0.00182654	0.00296518	0.00336932
4-Hydroxy-3-methoxy-2,10-bisaboladien-9-one	0.00201165	0.00239336	0.00355656	0.00207132	0.00140221	0.00247294	0.00240741	0.00306743	0.00196098	0.00266411	0.00206744	0.002795
4-Hydroxy-5-(dihydroxyphenyl)-valeric acid-O-methyl-O-sulphate	0.118818	0.354807	0.332669	0.183421	0.111907	0.115246	0.158341	0.401367	0.116989	0.0773985	0.0953626	0.181123
4'-Hydroxy-5,7-dimethoxyflavan	0.00260737	0.00173618	0.00130364	0.00137449	0.00210159	0.00200419	0.00165638	0.000969152	0.00134998	0.00104571	0.00109038	0.00107899
4-Hydroxyphenytoin glucuronide	0.0471489	0.0368299	0.0331568	0.0278632	0.0217792	0.0652974	0.105405	0.0264935	0.0152674	0.0130966	0.116215	0.0138026
4-Isothiocyanatophenylaminothiocarbonyl-2-((2-aminoethylaminocarbonylethyl)phenylethylamino)-5'-N-ethylcarboxamidoadenosine	0.0113904	0.0116207	0.0117524	0.0122521	0.0106782	0.0118196	0.0142855	0.0126112	0.0134583	0.0117742	0.0137589	0.0147266
4-Megastigmene-6a,9R-diol 9-[apiosyl-(1->6)-glucoside]	0.0231303	0.103157	0.13245	0.127828	0.148614	0.105681	0.0699402	0.17975	0.153876	0.0771021	0.0783347	0.13062
4-Methyl-4-[2-(octadecanoyloxy)ethyl]morpholin-4-ium 4-methylbenzene-1-sulfonate	0.417767	0.470067	0.394697	0.197727	0.275566	0.118346	0.180384	0.24797	0.367616	0.124557	0.177232	0.269469
4-Methyldibenzothiophene	0.0221123	0.0230097	0.0201227	0.0269419	0.0365644	0.0375477	0.0278819	0.0216975	0.0350036	0.0183594	0.0104655	0.0155509
4-Nonylpiperazine-1-carboxamide	0.00657398	0.005669	0.00560829	0.00448271	0.00574063	0.0132605	0.00409217	0.00749275	0.00395611	0.00472283	0.00873664	0.00487
4-O-Methyl-a-D-glucosyl-(1->2)-b-D-xylosyl-(1->4)-D-xylose	0.00116639	0.00118423	0.00149959	0.00143358	0.0015953	0.00185037	0.00276914	0.00194312	0.00214703	0.001839	0.00188465	0.00162609
4'-O-Methylkanzonol W	0.0104056	0.00316105	0.00410271	0.00360157	0.00292181	0.0075614	0.0125254	0.00314626	0.00229793	0.0009834	0.0109389	0.00160455
4-Oxoretinal	0	0.000277013	0.00112867	0.00152376	0.00152176	0.00142573	0.00319583	0.00254746	0.0009487	0.00106987	0.00223904	0.00230356
4S,5R-antillatoxin A	0.0327426	0.0373732	0.0398987	0.036099	0.0300386	0.0296583	0.0291559	0.0371142	0.0336303	0.041946	0.0334818	0.036576
4-Sulfocalix[8]arene	0.0233322	0.0283292	0.025838	0.026369	0.0164932	0.0196743	0.0178463	0.0243471	0.0250218	0.0301399	0.0364931	0.0309069
4-Trimethylammoniobutanoic acid	0.0125692	0.017888	0.0136755	0.0135374	0.0168705	0.0162852	0.0200779	0.0154912	0.0148413	0.0153944	0.0135417	0.0162459
4-Vinylphenol sulfate	0.0583694	0.0102896	0.00670681	0.00712921	0.0269013	0.0681578	0.0234752	0.00244828	0.00514608	0.00807289	0.00274216	0.00239624
4alpha-formyl-4beta-methyl-5alpha-cholesta-8-en-3beta-ol	0.00419211	0.00289422	0.0032532	0.00371437	0.00270725	0.00289285	0.00386543	0.00618262	0.00407678	0.00349824	0.00332847	0.00334283
5-(((4-Methyl-3-oxido-2,3-dihydro-2-quinazolinyl)methyl)thio)-1,3,4-thiadiazole-2(3H)-thione	0.00268936	0.00326222	0.00344919	0.0033663	0.00107944	0.00406363	0.00037322	0.00385024	0.00381858	0.00500535	0.00417855	0.00388386
5-(5-Aminopenta-2,4-dien-1-ylidene)-1,3-thiazolidine-2,4-dithione	0.0593028	0.0570817	0.0464412	0.0442202	0.0356443	0.0473133	0.0465505	0.0423183	0.0631457	0.0326901	0.0585121	0.0439441
5,10-Dioxo-5,10-dihydroanthra[9,1,2-cde]benzo[rst]pentaphene-16,17-diyl dioctadecanoate	0.016085	0.0201795	0.0297539	0.0209961	0.00891082	0.0137466	0.0148128	0.0173716	0.0216332	0.0277248	0.0221413	0.0222589
5,5',6,6'-Tetrahydroxy-3,3'-biindolyl	0.00475884	0.00271921	0.0035284	0.00228172	0.00201618	0.00532875	0.00527834	0.00281569	0.00178839	0.00144198	0.00969933	0.00193912
5,6,7,8-Tetrahydro-4-methylquinoline	0.00279063	0.00415552	0.00374981	0.00366302	0.00294662	0.00315545	0.00557729	0.00350037	0.00498049	0.00497709	0.00361266	0.00337589
5,6-Epoxy-8,11,14-eicosatrienoic acid	0.0153415	0.0154481	0.0342954	0.0194347	0.00661965	0.0180738	0.0212659	0.027732	0.0126534	0.0202185	0.0161701	0.020185
5,7-dihydroxy-3-[3-hydroxy-4-methoxy-5-(3-methylbut-2-en-1-yl)phenyl]-8-(3-methylbut-2-en-1-yl)-3,4-dihydro-2H-1-benzopyran-4-one	0	0	0.00229413	0.00195988	0.00217334	0.000192489	0.00209941	0.00332648	0	0.00173305	0.00184579	0.00271677
5,8-Dihydro-6-(4-methyl-3-pentenyl)-1,2,3,4-tetrathiocin	0.00349003	0.00280927	0.00270471	0.00249752	0.00303377	0.00300137	0.00241957	0.00428869	0.00164437	0.002366	0.00320017	0.00307547
5,9,11-trihydroxyprosta-6E,14Z-dien-1-oate	0.00336791	0.00300454	0.00394643	0.00253273	0.00443878	0.00380693	0.00368803	0.0123288	0.00454134	0.00366529	0.00178253	0.0023542
5-[2-(Diethylamino)ethoxy]-2,5-dimethylhex-3-yn-2-ol	0.000698327	0.00125087	0.000344438	0.0020083	0.00249453	0.00152432	0.00182361	0.00138677	0.0015906	0.0014667	0.00149083	0.00131577
5-{[3,4-Bis(decyloxy)phenyl]methyl}pyrimidine-2,4-diamine	0.00393224	0.00341641	0.00528075	0.00544528	0.00582493	0.00516254	0.00464761	0.00526802	0.00546305	0.00468306	0.00436357	0.00343614
5'alpha-Benzyl-12'-hydroxy-2'-isopropylergotaman-3',6',18-trione methanesulphonate	0.025316	0.0264479	0.0274059	0.0286296	0.0298684	0.0273986	0.0270448	0.0306822	0.0303154	0.026508	0.0281131	0.0306383
5b-Cholestane-3a,7a,12a,23S,25-pentol	0.00135666	0.00147183	0.00278531	0.00110315	0.00192068	0.00154104	0.00284072	0.002952	0.00193152	0.00302042	0.00133402	0.000933966
5b-Cyprinol sulfate	0.0373134	0.0293421	0.0290916	0.0317944	0.0438365	0.0478219	0.0481262	0.0315634	0.0295969	0.0365647	0.0334202	0.0453872
5b-Pregnanediol	0.00671669	0.00689106	0.00486571	0.00446581	0.00771614	0.00465224	0.00524687	0.0082303	0.0097208	0.0103981	0.0113623	0.010751
5-butyl-2-ethoxy-4,5-dihydro-1H-imidazole	0.00776457	0.00758367	0.00545198	0.00825701	0.0060036	0.00816182	0.00818024	0.00431735	0.00598839	0.00827452	0.0105513	0.0108808
5-Decanoyl-2-nonylpyridine	0	0	0.00164735	0.000947656	0.00236632	0.00802478	0.00158996	0.0130158	0	0.000862793	0.000573863	0.000462059
5-Diphosphoinositol pentakisphosphate	0.00209056	0.00200789	0.00210706	0.00178518	0.00214657	0.00198068	0.00187945	0.00179549	0.00199122	0.001868	0.00187651	0.00193902
5-Ethynyl-1,3-thiazole	0.185602	0.197762	0.188842	0.18545	0.203604	0.202727	0.13012	0.253902	0.157409	0.165718	0.15261	0.19017
5-Heptadecyl-1,3-benzenediol	0.00384171	0.00306044	0.0038272	0.00255975	0.00273957	0.00415987	0.0028582	0.00906521	0.00414701	0.00485093	0.00366869	0.00338818
5-Hydroxy-3,3',4',7,8-pentamethoxyflavone	0.00254866	0.00156524	0.00173643	0.0014739	0.0016492	0.00317282	0.00355303	0.00196519	0.0018237	0.00115792	0.00474148	0.00123747
5-Hydroxy-6-methoxycoumarin 7-glucoside	0	0.00254585	0.00413172	0.00339813	0.00250941	0.00552838	0.0108942	0.00297609	0.0018626	0.0012901	0.00793085	0.0017038
5-Hydroxymethyl tolterodine	0.123195	0.106578	0.211332	0.0653188	0.117511	0.086054	0.131479	0.189765	0.297593	0.135352	0.0992759	0.084262
5-Hydroxypentanoic acid	0.495165	0.574972	0.470891	0.463135	0.594431	0.655925	0.598835	0.43947	0.312707	0.504132	0.365983	0.434262
5-Met-enkephalin, 4-d-phe	0.018727	0.0120103	0.0203593	0.0164242	0.00847639	0.0196743	0.0217079	0.0165853	0.00813045	0.0152053	0.0150213	0.0190619
5-Methyltetrahydrofolic acid	0.000679408	0.00909426	0.00113867	0.0117805	0.00857164	0.00961528	0.00897383	0.00515397	0.00758393	0.0149863	0.0223053	0.0214474
5'-Methylthioadenosine	0.00445798	0.00444151	0.00408069	0.0041102	0.00447944	0.00427883	0.00463714	0.00462493	0.00354564	0.00469271	0.00412484	0.00481301
5-Nitro-1,2,3,4-thiatriazole	0.0116853	0.0401406	0.0108682	0.0163148	0.0147897	0.0123789	0.0110698	0.0370175	0.0363812	0.037172	0.0208994	0.0130233
5-O-Desmethyldonepezil	0.00288784	0.00299835	0.00997684	0.00397718	0.00156619	0.00432785	0.0050342	0.00679176	0.00251348	0.0046092	0.00366136	0.00468244
5-O-Feruloylnigrumin	0.00165442	0.0019273	0.00173736	0.00155496	0.00174136	0.00220291	0.00367399	0.00274982	0.00264214	0.00203282	0.00240026	0.00227735
5-Pentacosyl-1,3-benzenediol	0.00477913	0.00637753	0.00947867	0.0103855	0.00968864	0.0078842	0.00992311	0.0103399	0.00977982	0.00946249	0.00944586	0.00988637
5-propylideneisolongifolane	0.0015777	0.00103398	0.00100488	0.00192993	0.000864443	0.00222125	0.00100276	0.00105325	0.000888839	0.00103148	0.00301988	0.00185706
5-Sulfo-1,3-benzenedicarboxylic acid	0.00395156	0.00386384	0.00428619	0.003634	0.00272471	0.00349609	0.000998194	0.00412642	0.0034365	0.00399245	0.00344966	0.0031762
5-Sulfosalicylic acid	0.0217318	0.0277326	0.0237082	0.0273999	0.0306086	0.0234756	0.0255849	0.0272277	0.0295999	0.029898	0.025455	0.0277208
5-tert-Butyl-3H-1,2,3-diazaphosphole	0.00976599	0.00921939	0.00706182	0.00672355	0.0111617	0.0107427	0.00921087	0.00843117	0.00930058	0.00778942	0.00802209	0.0095632
5Z-Dodecenoic acid	0.00301506	0.00328006	0.00312208	0.003468	0.0033811	0.00280628	0.00274155	0.00299801	0.00338628	0.00278894	0.00333663	0.0034144
6-({3,7-dihydroxy-2-[3-hydroxy-10-(3-methoxyphenyl)-2-oxo-4-oxatricyclo[4.3.1.0?,?]decan-8-yl]-4-oxo-3,4-dihydro-2H-1-benzopyran-5-yl}oxy)-3,4,5-trihydroxyoxane-2-carboxylic acid	0	0	0.00135591	0.000958395	0.0013228	0.000670391	0.0010829	0.00253031	0.000968424	0.00128565	0.00166439	0.00207027
6-({4,5-dihydroxy-2-[hydroxy({2,3,4-trihydroxy-6-oxo-3-[3,4,5-trihydroxy-6-(hydroxymethyl)oxan-2-yl]cyclohexa-1,4-dien-1-yl})methyl]oxan-3-yl}oxy)-3,4,5-trihydroxyoxane-2-carboxylic acid	0	0.000155161	0.00210201	0.00184871	0.00179101	0.000606493	0.00227387	0.00361633	0.000397621	0.00171566	0.0024068	0.00300711
6-(2,4-dihydroxyphenyl)-2-{3-[(2E)-3-(2,4-dihydroxyphenyl)prop-2-enoyl]-2,6-dihydroxyphenyl}-4-methylcyclohex-3-ene-1-carboxylic acid	0.00432667	0.00416359	0	0.000744918	0.00338588	0.000514233	0.00229208	0.00103679	0	0	0	0.000833638
6-(3-Nitrophenoxy)hexa-2,4-diyn-1-yl octadecanoate	0.00377268	0.000561572	0.0213751	0.0204437	0.00120146	0.00213565	0.0109805	0.0207149	0.000523694	0.00290988	0.00106853	0.00423974
6-(4,5-dihydroxy-2-{3,5,7-trihydroxy-6-[3,4,5-trihydroxy-6-(hydroxymethyl)oxan-2-yl]-3,4-dihydro-2H-1-benzopyran-2-yl}phenoxy)-3,4,5-trihydroxyoxane-2-carboxylic acid	0	0.00112198	0.00194935	0.00201681	0.00243241	0.00159228	0.00240983	0.00310665	0.00189232	0.0019808	0.00211904	0.00268067
6-(4-{3-[(6-{[(2-carboxyacetyl)oxy]methyl}-3,4,5-trihydroxyoxan-2-yl)oxy]-5,7-dihydroxy-4-oxo-4H-chromen-2-yl}phenoxy)-3,4,5-trihydroxyoxane-2-carboxylic acid	0.0144458	0	0.00805423	0.0208515	0	0	0.000378647	0.00690283	0	0	0	0
6,10,14-Trimethyl-5,9,13-pentadecatrien-2-one	0.00206257	0.00257058	0.00284035	0.00247033	0.00261943	0.00253986	0.00266148	0.00333377	0.00238942	0.00311391	0.0030906	0.00295849
6,6'-Dinitro-2,2'-bi-1,3-benzothiazole	0.122201	0.0804983	0.0701747	0.0757195	0.00231972	0.021194	0.000881797	0.0155144	0.0883926	0.0870925	0.0349345	0.0379129
6,7-Dihydro-5H-2-pyrindine	0.251654	0.290413	0.273164	0.29254	0.292809	0.302735	0.31315	0.358944	0.339502	0.29943	0.233823	0.303005
6,7-dihydroxy-3-(2,3,4,5-tetrahydroxyphenyl)-4H-chromen-4-one	0.00156425	0.00126021	0.00105273	0.00085931	0.000788688	0.00212548	0.00350328	0.000993476	0.000351961	0.000449627	0.00331568	0.000412583
6,7-dihydroxy-3-(7-hydroxy-5-methoxy-2,2-dimethyl-3,4-dihydro-2H-1-benzopyran-6-yl)-4H-chromen-4-one	0.0110555	0.010379	0.00927836	0.0125874	0.0106318	0.0151184	0.0161592	0.00998875	0.00674069	0.00943228	0.00389781	0.006104
6,7-Dimethoxy-7-epirosmanol	0.00716117	0.00681712	0.00447973	0.00198995	0.00625131	0.0108374	0.00743758	0.00387292	0.00195431	0.00141146	0.00532426	0.0063606
6-[(2-carboxyacetyl)oxy]-3,4,5-trihydroxyoxane-2-carboxylic acid	0.00252794	0.00081557	0.00103202	0.000927122	0.000701616	0.00196499	0.00278849	0.000779782	0.000431336	0.000218861	0.00225343	0.00036736
6-[(3-carboxy-5,6-dihydroxycyclohex-3-en-1-yl)oxy]-3,4,5-trihydroxyoxane-2-carboxylic acid	0.00212834	0.00139952	0.000688623	0.00034401	0.00140284	0.00423889	0.00081918	0.00625694	0.00196586	0.00363961	0.00239709	0.00245277
6-[(6-{[3,4-dihydroxy-2,5-bis(hydroxymethyl)oxolan-2-yl]oxy}-3,4,5-trihydroxyoxan-2-yl)methoxy]-3,4,5-trihydroxyoxane-2-carboxylic acid	0.0157873	0.0179548	0.0218319	0.0167039	0.017882	0.0228565	0.0389241	0.0174687	0.02398	0.0133084	0.0170264	0.0184095
6-[1-(3,4-dimethoxyphenyl)-2-{[2-(3,4-dimethoxyphenyl)ethyl]-C-hydroxycarbonimidoyl}ethoxy]-3,4,5-trihydroxyoxane-2-carboxylic acid	0.00397001	0.00446073	0.00687589	0.00560857	0.00367332	0.00454292	0.00639123	0.00706083	0.00924317	0.00999315	0.00891292	0.00608141
6-[4-(5,7-dihydroxy-6-{4-hydroxy-6-methyl-5-oxo-3-[(3,4,5-trihydroxy-6-methyloxan-2-yl)oxy]oxan-2-yl}-4-oxo-4H-chromen-2-yl)phenoxy]-3,4,5-trihydroxyoxane-2-carboxylic acid	0.00377589	0.010316	0.000860517	0.000747905	0.00169887	0.00124718	0.0110874	0	0.00024407	0	0	0.00402893
6-[5-(2-{[2-(3,4-dimethoxyphenyl)ethyl]-C-hydroxycarbonimidoyl}eth-1-en-1-yl)-2-methoxyphenoxy]-3,4,5-trihydroxyoxane-2-carboxylic acid	0.0057056	0.00164517	0.00286431	0.00199499	0.00178388	0.00408335	0.00698041	0.00228117	0.000883558	0.000625205	0.00665619	0.000868729
6-[5-(5,7-dihydroxy-4-oxo-3-{[3,4,5-trihydroxy-6-(hydroxymethyl)oxan-2-yl]oxy}-4H-chromen-2-yl)-2,3-dihydroxyphenoxy]-3,4,5-trihydroxyoxane-2-carboxylic acid	0.00948804	0.00832246	0.00688762	0.00544432	0.00898875	0.0088995	0.00643525	0.00714731	0.00609538	0.00484906	0.00550656	0.0067885
6-{[(1R,16S)-5,7-dihydroxy-8,8,10,12,16-pentamethyl-3-[1-(2-methyl-1,3-thiazol-4-yl)prop-1-en-2-yl]-9-oxo-17-oxa-4-azabicyclo[14.1.0]heptadec-4-en-11-yl]oxy}-3,4,5-trihydroxyoxane-2-carboxylic acid	0.0423695	0.0413943	0.0359088	0.0388334	0.0369037	0.0385905	0.0344861	0.0335128	0.0372591	0.0299454	0.0328279	0.0469142
6-{[(2S)-1,4-Bis(dodecyloxy)-1,4-dioxobutan-2-yl]amino}-6-oxohexanoic acid (non-preferred name)	0.00352272	0.00576941	0.00460309	0.0050772	0.00499741	0.00458253	0.00481355	0.00510209	0.00460136	0.00513003	0.00477549	0.00478526
6-{3,5-dihydroxy-2-[3,4,5-trihydroxy-6-(hydroxymethyl)oxan-2-yl]phenoxy}-3,4,5-trihydroxyoxane-2-carboxylic acid	0.0121942	0.0112235	0.0091422	0.00785975	0.00640969	0.0187479	0.0278595	0.00849156	0.00480112	0.00366134	0.0314985	0.00425015
6-{4-[3-(3,7-dimethylocta-2,6-dien-1-yl)-5-hydroxy-8-(hydroxymethyl)-8-methyl-4-oxo-4H,8H-pyrano[3,2-g]chromen-2-yl]-3-hydroxyphenoxy}-3,4,5-trihydroxyoxane-2-carboxylic acid	0.0189713	0.0185786	0.010833	0.0178784	0.015549	0.0158135	0.0122875	0.0148903	0.0111421	0.00838104	0.0131874	0.0182429
6'-Butoxy-3-oxo-3H-spiro[2-benzofuran-1,9'-xanthen]-3'-yl (3aR,4aR,7aR,8aS)-8-(1-ethoxyethoxy)-2,2,6,6-tetramethylhexahydro-2H,6H-benzo[1,2-d:4,5-d']bis[1,3]dioxol-4-yl methyl phosphate	0.0149506	0.0131794	0.0182365	0.0182583	0.00321441	0.00734486	0.00490879	0.010521	0.00911009	0.0124475	0.0141878	0.0115148
6''-Caffeoylhyperin	0	0	0.00169663	0.00118674	0.00189256	0.000198461	0.00265281	0.00338233	0	7.01e-05	0.00429603	0.00197671
6-Heptadecyl-1,3,5-triazine-2,4-diamine	0.000267152	0.00331281	0.00601356	0.00576363	0.0064699	0.00296888	0.00577891	0.0067022	0.0044241	0.00531309	0.00534718	0.00584141
6-Hydroxy-5-methoxyindole glucuronide	0.00208477	0.0032871	0	0	0.0252499	0.00406993	0.00651772	0.0272501	0.00718285	0.00625944	0.01706	0.027353
6-Hydroxymelatonin glucuronide	0.0279589	0.0260651	0.0105139	0.0156923	0.0213796	0.0152667	0.0146496	0.0221039	0.00989528	0.0102924	0.00720447	0.0183165
6-Mercaptopurine ribonucleoside triphosphate	0.00463062	0.00591073	0.00546878	0.00491613	0.00125935	0.00527006	0.000178051	0.00531932	0.00460537	0.00591638	0.00554302	0.00486407
6-Methylquinoline	0.0124754	0.0111177	0.00946237	0.0093195	0.0150786	0.0145281	0.0115677	0.0104657	0.011379	0.0104825	0.0105883	0.0131356
6-Sulfatoxymelatonin	0.00781665	0.0126212	0.0113489	0.00960374	0.00813949	0.00916619	0.0126646	0.00903755	0.00929609	0.00790962	0.00635109	0.00584667
6-Thiourate	0.0095632	0.00988594	0.00905448	0.0100434	0.00819334	0.00886615	0.00781974	0.0087078	0.00955591	0.00976323	0.00832435	0.00862298
7,8-Dehydroastaxanthianthin	0.13066	0.132423	0.0992358	0.117601	0.0980673	0.0878895	0.118744	0.125081	0.134724	0.0856854	0.0905012	0.120385
7',8'-Dihydro-8'-hydroxyreticulataxanthin	0.00240277	0.00146156	0.0193328	0.0172444	0.000565734	0.000379303	0.00942307	0.01935	0.00098759	0.00290629	0.00102524	0.000468421
7-{[2,6-dihydroxy-5-(hydroxymethyl)-2,5,8a-trimethyl-decahydronaphthalen-1-yl]methoxy}-2H-chromen-2-one	0.0334434	0.033186	0.0281609	0.0185817	0.0228281	0.025599	0.0274304	0.0278111	0.0227955	0.0294625	0.0139359	0.0340233
7233-03-06	0	0.00335109	0.00450157	0.00331685	0.00292655	0.00656954	0.012717	0.00328276	0.0019188	0.00149395	0.00979476	0.00163965
7-hydroxy-1-oxo-1H-isochromene-3-carboxylic acid	0.00185011	0.00188054	0.00200573	0.00133214	0.00100693	0.0030878	0.00530841	0.00135308	0.00106461	0.000735269	0.00552301	0.000800224
7-Hydroxyoctanoic acid	0.0522919	0.0261392	0.0542725	0.0666604	0.0201251	0.0454445	0.0351814	0.0280928	0.0295911	0.0188512	0.031214	0.0504192
7-Ketocholesterol	0.016994	0.0127752	0.0145022	0.0196626	0.0163456	0.0208525	0.0178653	0.0293148	0.016831	0.0191539	0.0171693	0.0200582
7-Ketodeoxycholic acid	0.00794311	0.0316738	0.00104626	0.00296301	0.0220511	0.0137962	0.00402835	0.0217821	0.00404202	0	0.00366523	0.032821
7-Methylguanine	0.00552043	0.00171851	0.00270507	0.00192106	0.00561599	0.00599881	0.00353766	0.00666118	0.00349736	0.00765995	0.00683611	0.00674724
8,8'-{Carbonylbis[azanediyl(4-methyl-3,1-phenylene)carbonylazanediyl(4-methyl-3,1-phenylene)carbonylazanediyl(4-methyl-3,1-phenylene)carbonylazanediyl]}di(naphthalene-1,3,5-trisulfonic acid)	0.00568205	0.00601735	0.0032636	0.00486238	0.00460648	0.00731731	0.010432	0.00271072	0.0053434	0.00477077	0.00206937	0.00584079
8-[3,7-dihydroxy-2-(4-hydroxy-3-methoxyphenyl)-3,4-dihydro-2H-1-benzopyran-4-yl]-2-(3,4-dihydroxyphenyl)-3,4-dihydro-2H-1-benzopyran-3,5,7-triol	0	0.00105769	0.00259969	0.00196642	0.00265877	0.00193746	0.00297816	0.00423229	0.00236211	0.00246423	0.00259773	0.00379176
89-(p-Nonylphenoxy)nonacosaoxanonaoctacontan-1-ol	0.0219479	0.0284851	0.0403701	0.0341891	0.0165444	0.0221748	0.0250855	0.0292103	0.0350793	0.040544	0.0327904	0.0331802
8-Acetoxypinoresinol 4-glucoside	0.0117243	0.0105394	0.0109338	0.0116173	0.0108226	0.0167934	0.0167325	0.0225966	0.0133914	0.0232853	0.018449	0.0214005
8-hydroxy-2-methyl-2-(4-methylpent-3-en-1-yl)-2H-chromene-5-carboxylic acid	0.0168776	0.0293945	0.067576	0.0486106	0.01823	0.00676182	0.0227175	0.0148794	0.0200126	0.0536223	0.0195043	0.00356888
8-Isoprostane	0.00620909	0.00422298	0.00470055	0.0051997	0.0060764	0.00700868	0.00448906	0.00580624	0.00585676	0.00615637	0.00724002	0.00603807
9,10-Anthracenedione, 1,4-bis((2-(bis(1-methylethyl)amino)ethyl)amino)-5,8-dihydroxy-	0.0241694	0.0216942	0.0187402	0.0215471	0.0210869	0.0179308	0.0200482	0.0229193	0.0194029	0.0169343	0.0175243	0.0201027
9,12-Hexadecadienoylcarnitine	0.00683211	0.00463241	0.00571527	0.00495442	0.00394158	0.00673969	0.00555334	0.0187594	0.00879695	0.00953747	0.00645933	0.00687566
9'-Carboxy-gamma-chromanol	0.0553205	0.0660246	0.0594176	0.059999	0.0619036	0.0588118	0.0594178	0.0673497	0.0649545	0.0738288	0.0656548	0.0710682
9'-Carboxy-gamma-tocotrienol	0.0325723	0.0485999	0.0352054	0.0237206	0.021355	0.0332095	0.0305962	0.0491005	0.0385198	0.0440891	0.0491552	0.0571277
9-cis-Retinoic acid	0	0.000819089	0.00190241	0.00203848	0.00162836	0.00156815	0.00177059	0.00292425	0.00142926	0.00201596	0.00179399	0.002514
9H-Fluoren-2-amine, 7-(2-benzothiazolyl)-9,9-didecyl-N,N-diphenyl-	0.00406242	0.00917215	0.112856	0.00163083	0.00134852	0.0760836	0.011764	0.00364066	0.00186271	0.108443	0.00175941	0.00396775
9H-Purin-6-amine, 9-(3-(butylamino)-3-deoxy-5-O-((4-methoxyphenyl)diphenylmethyl)-beta-D-arabinofuranosyl)-N-((4-methoxyphenyl)diphenylmethyl)-	0.00480236	0.00213322	0.00381532	0.00169594	0.000361893	0.00491041	0.00747955	0.00202006	0.000688654	0.000314064	0.00731602	0.010946
9-Hydroxybenzo[a]pyrene-4,5-oxide	0.0108827	0.016176	0.0134238	0.0420442	0.0140182	0.0128721	0.0101502	0.0183871	0.0123275	0.00692701	0.00809404	0.0129339
9-Octadecenenitrile, (9Z)-	0.00534991	0.00444309	0.00521466	0.00620526	0.00486084	0.00444211	0.00634359	0.00486067	0.00645059	0.00594259	0.00572439	0.0062721
9-Octadecenoic acid (9Z)-, compd. with (9Z)-N,N-dimethyl-9-octadecen-1-amine (1:1)	0.0383057	0.0319414	0.0347623	0.0334268	0.0322651	0.0365834	0.0344055	0.0379542	0.0286916	0.0348129	0.0322708	0.0358517
9-Octadecenoic acid, 12-(acetyloxy)-, 1,2,3-propanetriyl ester, (9Z,9'Z,9''Z,12R,12'R,12''R)-	0	0	0.000240843	0.000699019	0.00104837	0	0.00126967	0.00250663	0	0.000898934	0.00136365	0.00181335
9-Pentadecenoic acid	0.00397878	0.0106136	0.00224498	0.013771	0.0140715	0.0124467	0.0129149	0.00990546	0.0107133	0.0115937	0.00991125	0.0103044
AC1LD8M2	0	0.000678141	0.000882134	0.00123491	0.00351511	0.0018732	0.00158541	0.00114807	0.0016026	0.0015733	0.00190236	0.00255358
AC1NQZVR	0.00396374	0.00841001	0.00370187	0.00298745	0.00504389	0.0037857	0.00440189	0.00450958	0.00515158	0.00207704	0.00033074	0.00326789
AC1NUR3I	0.00275189	0.00263084	0.00267685	0.00267952	0.00292633	0.00245662	0.00269221	0.00289243	0.0023314	0.00270437	0.00264836	0.00308384
Acesulfame	0.00924094	0.0119877	0.00911178	0.0106038	0.00867968	0.00719647	0.00700106	0.00783604	0.00816906	0.00639354	0.00676112	0.00806405
Acetaldehyde diisoamyl acetal	0.0060233	0.00759704	0.00632542	0.00729012	0.00778709	0.00781181	0.00825982	0.00843022	0.00828164	0.00882207	0.00976669	0.00892124
Acetamide, 2-(dibutylamino)-N-(2,5-dimethylpyrrol-1-yl)-	0.00905143	0.00318496	0.00693571	0.0034181	0.00407701	0.00482237	0.00369606	0.00557978	0.00438809	0.00457984	0.00557082	0.0049013
Acetic acid	0.0961304	0.0555815	0.0522491	0.043554	0.0651709	0.159873	0.052158	0.148672	0.109996	0.179822	0.107178	0.100434
Acetic acid--(2R)-3-(octadecyloxy)propane-1,2-diol (2/1)	0.0139075	0.0196158	0.0290047	0.0292682	0.0319768	0.0259955	0.0279701	0.0296956	0.0257287	0.0271083	0.0281471	0.0310294
Acetic acid, (6-isopropyl-2-methoxycarbonyl-3-methylphenoxy)-, 2-(diethylamino)ethyl ester	0.0176112	0.0246658	0.0105212	0.00707301	0.0112441	0.0114409	0.015427	0.0102557	0.00910336	0.0098435	0.00395196	0.020638
Acetic acid--1-(2,5-dihydroxy-3-methoxyphenyl)pentadecan-2-yl acetate (2/1)	0.114641	0.116542	0.085024	0.0954156	0.0655963	0.0696573	0.0912455	0.0867779	0.0812737	0.0715706	0.0622646	0.0870475
Acetyl tributyl citrate	0.00208204	0.00508547	0.00545281	0.00671011	0.006715	0.00551861	0.00464729	0.00745035	0.0060847	0.00588924	0.00463655	0.00541012
acetyl-b-methylthiocholine	0.000489133	0.0012268	0.00105774	0.00373917	0.00474178	0.00190014	0.00284513	0.00113097	0.00281846	0.0586741	0.00604595	0.00312859
Acetylcysteine	0.0173032	0.0170579	0.0167812	0.0169084	0.0171366	0.0178239	0.0185614	0.0172555	0.0184239	0.019509	0.0189418	0.0198151
Acetylglycine	0.0466494	0.0319907	0.0266036	0.0203451	0.0461403	0.0794118	0.0509611	0.0481554	0.0406405	0.0792587	0.0310522	0.0490826
Acidissiminol	0.0236648	0.015721	0.021494	0.0200928	0.0167132	0.0156214	0.022163	0.0106715	0.0154869	0.0171929	0.0146533	0.0164158
Aclacinomycin S	0.0320327	0.0325809	0.0219673	0.0317478	0.0151822	0.0185543	0.0275041	0.0205067	0.0158826	0.0123451	0.0200539	0.0192794
Acrimarine N	0.0145243	0.0127733	0.0137946	0.0133543	0.0129895	0.0156925	0.0144995	0.019858	0.0146319	0.0197249	0.0178114	0.0230859
ACRL Toxin II	0.0250797	0.0230391	0.0342867	0.0264064	0.016911	0.0269826	0.0285969	0.054555	0.0256954	0.0259784	0.0252389	0.0341584
Actinorhodin	0.00778449	0.0175373	0.0127426	0.0383734	0.000631853	0.00901989	0.00650337	0.0183528	0.0158836	0	0.0102149	0.0145865
Acuminoside	0.0119436	0.0150259	0.0117893	0.0141329	0.0108043	0.00895233	0.014463	0.0120542	0.0157205	0.0128928	0.0104565	0.0118524
Adenosine	0.0105103	0.00485002	0.0103418	0.187014	0.285528	0.422785	0.28411	0.25775	0.091587	0.00513021	0.0413382	0.00593999
Adenosyl cobinamide phosphate	0.0158785	0.0164132	0.00753915	0.010003	0.00719651	0.0205324	0.018256	0.00580078	0.0168633	0.00835934	0.00565513	0.0148833
Adrenorphin	0.000458319	0.0013861	0.00210062	0.00281909	0.0033182	0.000572606	0.00507159	0.00726889	0.00125848	0.0038367	0.00373906	0.00481915
Aflatoxin B1exo-8,9-epoxide-GSH	0	0	0.00164391	0.00144483	0.00125649	0.00113369	0.00371734	0.00219211	0	0.000232675	0.00386355	0.00100389
Agavasaponin D	0.00651497	0.00529239	0.0124351	0.0107493	0.000216569	0.00182661	0.00176246	0.00308064	0.00316563	0.00709441	0.00854675	0.00533307
Agavoside A	0.190952	0.174338	0.14974	0.194592	0.178017	0.187138	0.166143	0.159376	0.171021	0.110352	0.147631	0.186981
AG-H-17690	0.024509	0.0302031	0.0257892	0.026274	0.0226542	0.0228903	0.0255815	0.0291641	0.0214941	0.0229611	0.0247864	0.0248899
AGN-PC-0LOJHW	0	0	0.00151157	0.000595995	0.0015764	0	0.00120702	0.00170107	0	0.000634249	0.00142005	0.00165648
AGN-PC-0LP1YT	0.0215125	0.0167553	0.0208983	0.0154898	0.0162891	0.0188923	0.0185503	0.0187889	0.0175294	0.0174903	0.0190802	0.0188031
AICA-riboside	0.00361236	0.00356828	0.00284324	0.00369823	0.00280764	0.00383614	0.00360409	0.00308901	0.00281668	0.00312022	0.00499983	0.00269364
Ala Arg Arg Trp	0.702468	0.673569	0.42993	0.673323	0.412855	0.507031	0.482184	0.477314	0.530105	0.48021	0.779213	0.647086
Ala Cys Phe Trp	0.0088447	0.00806963	0.00696176	0.00798505	0.00360643	0.00909183	0.0110037	0.00803379	0.0051293	0.00672871	0.00943853	0.0129294
Ala Glu Phe His Phe	0.0188678	0.0199303	0.0120928	0.0148551	0.0127636	0.0139731	0.0124114	0.0106086	0.0110819	0.00700909	0.00996266	0.0141554
Ala Ile Asn Pro	0.0249198	0.0185976	0.0361865	0.0154498	0.00409301	0.0207536	0.0284613	0.0331363	0.00803114	0.018905	0.0113456	0.021738
Alanine betaine	0.0071544	0.00781544	0.00859803	0.00894104	0.0088626	0.00968223	0.0109863	0.0112021	0.0106956	0.0125492	0.00883997	0.0100828
Alanyl-alanyl-alanyl-seryl-phenylalanyl-lysyl-alanyl-lysyl-lysinamide	0.00263954	0	0.0016745	0.00257352	0.0028238	0.00163401	0.00563985	0.00430592	0.00193364	0.00378783	0.003246	0.00261561
Albendazole sulfone	0.00179576	0.00179597	0.0022975	0.00155243	0.00115251	0.00356308	0.00547317	0.00166315	0.00119034	0.000599919	0.00571504	0.000867712
Aldosterone 18-glucuronide	0.0267636	0.0175911	0.0326867	0.0264763	0.0246676	0.0366911	0.0278884	0.0439571	0.028751	0.0368864	0.0357842	0.0341378
All trans decaprenyl diphosphate	0.00117888	0.000949777	0.00197127	0.00211125	0.00532699	0.00295442	0.00232886	0.00173223	0.00208455	0.00206395	0.00259502	0.00266695
Allantoin	0.0683836	0.0462433	0.0493321	0.041899	0.0892715	0.068169	0.0934012	0.0690279	0.0579362	0.0594162	0.0361044	0.0748683
Allatotropin (5-13), nle(7,8)-	0.00425351	0.00484667	0.00949703	0.00650162	0.0009113	0.00200165	0.00292621	0.00303305	0.0036344	0.00963763	0.00639634	0.00541821
Alliospiroside D	0.000627469	0.000622926	0.00223717	0.0110466	0.00436403	0.00101878	0.00797189	0.0166528	0.00134699	0.0020523	0.00414352	0.00256003
Allolithocholic acid	0.047858	0.0531338	0.0538187	0.058302	0.0653149	0.061457	0.0654822	0.082585	0.0083723	0.00831193	0.010945	0.0935559
all-trans-Carophyll yellow	0.036664	0.0363657	0.0291091	0.0314861	0.0182946	0.020799	0.0310001	0.0259531	0.0251704	0.0221174	0.0238442	0.0270858
all-trans-Retinoic acid	0.00892074	0.00727219	0.0115944	0.00751642	0.00224477	0.0102221	0.0102202	0.0145766	0.00486811	0.0109137	0.00968701	0.0124028
alNAcbeta1-4(NeuGcalpha2-3)Galbeta1-4Glcbeta-Cer(d18:1/16:0)	0.009452	0.00816442	0.0106815	0.0105773	0.0108218	0.0101145	0.00922775	0.00619461	0.00728731	0.00702593	0.00872922	0.00907515
alpha-Agatoxin AG 468	0.00846068	0.0112942	0.00658399	0.00323156	0.00592376	0.00385468	0.00334394	0.00428298	0.0087619	0.00470463	0.00499713	0.00364142
alpha-CEHC	0.108019	0.122073	0.121779	0.128127	0.136957	0.132601	0.131537	0.131112	0.134275	0.14015	0.139035	0.142083
alpha-D-galactosyl undecaprenyl diphosphate	1.55822	1.46959	1.18216	1.26216	1.33764	1.27821	1.20486	1.39644	0.960787	0.556119	0.920021	1.13121
alpha-hydroxysalmeterol	0.00642785	0.0104456	0.0171367	0.00860759	0.0089887	0.0104412	0.0107011	0.010707	0.0126243	0.0072655	0.014202	0.0146809
alpha-Ketoisovaleric acid	0.0617671	0.110722	0.0860959	0.0978175	0.119252	0.110545	0.0774196	0.0794316	0.0577978	0.0601496	0.0457769	0.0572717
alpha-Linolenic acid	0.041354	0.020265	0.0372963	0.0226888	0.0178486	0.0286568	0.0219121	0.032193	0.0230491	0.0286317	0.0338186	0.0268171
Alpha-Tocotrienol	0.0145934	0.011133	0.0127277	0.0132191	0.00879322	0.0122813	0.013596	0.0256304	0.0154964	0.0185045	0.0130574	0.0152778
alpha-Tocotrienoxyl radical	0.00391496	0.0037645	0.00369016	0.00402125	0.00412071	0.00435345	0.00410384	0.0081652	0.00532204	0.00572346	0.00616236	0.0097817
Alpha-Trisaccharide	0.0142737	0.0358897	0.0149686	0.0167205	0.0109752	0.0100827	0.0144394	0.0136745	0.0168146	0.0121151	0.0128266	0.0142017
Alprenolol	0.0178465	0.0176644	0.0214492	0.0254781	0.0248287	0.0559231	0.0249097	0.0320566	0.0278227	0.0438588	0.028099	0.0249437
Altersetin	0.00491901	0.0073617	0.00748868	0.00825732	0.00875909	0.00828761	0.00810716	0.0112075	0.0110998	0.0117321	0.0110612	0.0120436
Americanin B	0.00644286	0.00633087	0.000537347	0.0016017	0.00504455	0.0021494	0.00296098	0.00105129	0	0	0	0.000673275
Amikacin	0.0191755	0.0211719	0.0229947	0.0224404	0.0242533	0.0227086	0.0233885	0.0236043	0.0247807	0.0245653	0.0243728	0.0250832
Aminoadipic acid	0.00646833	0.00953399	0.00620248	0.00582801	0.00856004	0.018381	0.00791558	0.0112186	0.00917976	0.0171905	0.00742082	0.0122973
Ampeloside Bf2	0.0048498	0.00485585	0.00486442	0.00745947	0.00937076	0.00992281	0.00704484	0.00591601	0.00595298	0.00407689	0.00511506	0.0068252
Amrinone	0.00840201	0.00844903	0.00875493	0.00869932	0.0177029	0.0181614	0.0119447	0.0111923	0.00817962	0.00826671	0.00737557	0.012007
AN-465/41520606	0.0434795	0.0437195	0.0354087	0.0426136	0.04833	0.0432071	0.0443143	0.0371155	0.041368	0.0290287	0.033856	0.0388642
Angiotensin II, ala(8)-	0.0134159	0.0176953	0.0228921	0.0197763	0.0289536	0.0238827	0.0168439	0.0323838	0.0226226	0.0242884	0.0164296	0.0189157
Angiotensin II, sar(1)-phe(4)-ile(8)-	0.00549671	0.00601373	0.00548474	0.00496539	0.00834657	0.00657179	0.00397142	0.00700674	0.00572212	0.00465899	0.00363255	0.00572573
anhydroretinol	0.000890463	0.00141873	0.00173023	0.00241513	0.00308893	0.00223368	0.00185871	0.00242849	0.00120008	0.00174559	0.00173403	0.0019401
Annoglabasin F	0	0.000836298	0.00117164	0.00022683	0.0013357	0.00141089	0.00215364	0.000351719	0.00217242	0.000722486	0.00183462	0.003263
Annomuricin A	0.000210951	0.00059388	0.000603306	0.00103103	0.0036217	0.00200609	0.00158254	0.000952161	0.000970667	0.00156815	0.00142174	0.00172579
Anofinic acid	0.0221722	0.0281196	0.0274879	0.0283251	0.0296753	0.029323	0.0295911	0.0287513	0.0307315	0.0308961	0.0313934	0.0311846
Aprindine	0.000664911	0.00134502	0.00216236	0.00104789	0.00110862	0.00215974	0.00145635	0.00183423	0.00131976	0.0010516	0.00294394	0.00185838
Arachidonic acid	0.15431	0.217001	0.142309	0.103883	0.108979	0.136249	0.140701	0.143738	0.1131	0.118309	0.119138	0.140784
Arachidonoylcarnitine	0.00971974	0.00708649	0.00838468	0.00755447	0.00625998	0.0066151	0.00723357	0.00998982	0.0062068	0.00761724	0.00480607	0.00782628
Arachidonoylcholine	0.00765744	0.00685129	0.0132941	0.0137568	0.014677	0.010299	0.0139923	0.0162218	0.0110775	0.0128196	0.0135695	0.015815
Arbutamine	0.00335513	0.00446507	0.00380753	0.00565313	0.00668325	0.00663681	0.00457872	0.00490362	0.00420201	0.00361153	0.00370586	0.00397502
Archaeol	0	0	0.000296326	0	0.000865689	0.00665842	0.000286401	0.00785959	0	0	6.19e-05	0
Arg Arg Tyr Tyr	0.00115729	0.00125125	0.00240555	0.00199307	0.00208171	0.00137706	0.00194226	0.00332295	0.00212997	0.00139047	0.00199238	0.00240069
Argipressin, 1-(4-thio-4-tetrahydropyranoacetic acid)-O-Et-tyr(2)-val(4)-	0.00845843	0.00780112	0.00461091	0.00571057	0.0051405	0.00927544	0.0090325	0.00436947	0.00763097	0.00472285	0.00337498	0.00816782
Artomunoxanthentrione epoxide	0.0254598	0.014416	0.01257	0.0071921	0.00781433	0.0040181	0.0255818	0.00656417	0.00341895	0.0015539	0.00453204	0.00289731
Artonin T	0.152659	0.16141	0.198471	0.162926	0.176441	0.203881	0.35632	0.234253	0.194354	0.166288	0.183045	0.170017
Ascorbic acid	0.0822789	0.102896	0.100917	0.097694	0.043725	0.103595	0.0289774	0.11412	0.139802	0.153682	0.156466	0.145417
Ascorbic acid-2-sulfate	0.0827107	0.0925488	0.114453	0.0746621	0.0963557	0.101165	0.0873331	0.101238	0.112833	0.139298	0.10005	0.107933
Asitribin	0.00141622	0.00330853	0.00314485	0.00187599	0.00185976	0.0017148	0.00165865	0.000733193	0.00257874	0.000767431	0.000742866	0.00052649
Asp Arg Val Tyr	0.00820932	0.00817626	0.00742049	0.00790693	0.0115344	0.00623639	0.00715613	0.00795253	0.00702251	0.0069364	0.00757976	0.00734944
Asp Asp Ile Lys	0.0303367	0.0484917	0.0341631	0.0367379	0.0384089	0.0385654	0.0341047	0.0464389	0.0565172	0.0515951	0.0206943	0.0350654
Asp Lys Lys	0.11827	0.114419	0.189255	0.126581	0.044237	0.120386	0.143267	0.147103	0.0681231	0.142229	0.120318	0.164388
Asp Phe Lys Trp	0.0497892	0.0469899	0.0465043	0.0418735	0.0283435	0.034291	0.0299322	0.0332819	0.0396206	0.0539921	0.0384974	0.0439381
Asp Pro Arg Trp	0.00758382	0.00781699	0.00720121	0.00699371	0.00780596	0.00647367	0.00616201	0.00709302	0.00605674	0.00626389	0.00493398	0.0054238
Asparagoside B	0.304836	0.349354	0.208599	0.0960743	0.234143	0.18906	0.24213	0.22812	0.177812	0.0964042	0.123076	0.175677
Aspartyl-Histidine	0.0519759	0.115434	0.0732081	0.102285	0.106005	0.0572865	0.0657779	0.0679643	0.143853	0.121815	0.0855556	0.0932031
Assamsaponin F	0.0164077	0.0346587	0.0181466	0.0316844	0.0560586	0.0100924	0.0190216	0.0729417	0.0311901	0.0585268	0.0308814	0.00850423
Assamsaponin J	0.00562596	0.00691355	0.00330726	0.00347401	0.00248109	0.00712876	0.00632264	0.00276974	0.00618221	0.00402684	0.00221208	0.00540319
Atrial natriuretic factor (1-16)	0.0123243	0.0146613	0.0145922	0.0118324	0.0249219	0.0217308	0.0105583	0.0237591	0.015091	0.0122431	0.0103385	0.0198244
Austalide I	0.0270479	0.0195748	0.00522268	0.0101144	0.0195103	0.0103868	0.0155111	0.00779207	0.00475862	0.00600914	0.00471298	0.0133863
Austalide K	0.0958539	0.0765245	0.139114	0.0612369	0.0203445	0.0830307	0.112382	0.134305	0.0390013	0.0795148	0.0554873	0.082637
Avadharidine	0.00248493	0.00184417	0.00485205	0.00415029	0.0035179	0.00275366	0.00370533	0.00637157	0.00398946	0.00263067	0.00375503	0.00440368
AV-Ceramide	0.000429667	0.000659249	0.00100365	0.0013768	0.0077128	0.00413564	0.0030972	0.000861147	0.00197473	0.00222376	0.00225645	0.00302466
ax-4''-Hydroxy-3-'-methoxymaysin	0.0130797	0.0112068	0.00901662	0.0111136	0.00784645	0.015536	0.0168749	0.0099151	0.0070559	0.0113455	0.0142849	0.0209452
Azathioprine	0.0154222	0.0166958	0.0151105	0.0146875	0.00254749	0.0140142	0.0362446	0.0152586	0.0239222	0.0313077	0.00657763	0.0111542
Azelaic acid	0.0349412	0.0220596	0.0377023	0.0374707	0.0351157	0.0408993	0.046219	0.021904	0.0191552	0.0372101	0.0446381	0.0434402
Azithromycin C	0.00954968	0.00764438	0.00748274	0.00614795	0.00434199	0.00738211	0.0061224	0.0126507	0.00424112	0.00291312	0.00532693	0.0081959
Bacitracin B1	0.00887585	0.00923342	0.00451058	0.007899	0.00366916	0.00939267	0.0081923	0.00379075	0.00777723	0.00393536	0.00368761	0.00791295
Bacitracin C1	0.00233991	0.00214959	0.00230952	0.00226181	0.00213294	0.00245724	0.0022811	0.00176887	0.00290213	0.00206546	0.00252207	0.00251532
Bakers yeast extract	0.00491319	0.00263466	0.00250507	0.00211213	0.00271585	0.00536349	0.00486404	0.00381667	0.0025257	0.00102679	0.00787654	0.00192921
Balalom	0.00515196	0.00418477	0.00475097	0.00373442	0.00260017	0.00230436	0.00365501	0.00474633	0.00437258	0.00250034	0.00225536	0.00362549
b-D-fructosyl-a-D-(6-O-(E))-feruloylglucoside	0.00180021	0.00628676	0.00186357	0.000577499	0.000706998	0.000835183	0.00121207	0.00184063	0.000686123	0.00131023	0.000215486	0.00246552
Bekanamycin sulfate	0.0227719	0.0166336	0.0238799	0.0222411	0.0204905	0.0284995	0.03455	0.0406381	0.0255648	0.0464225	0.0336867	0.0417767
Benzaldehyde	0.00845462	0.00900381	0.0083387	0.00885539	0.00957977	0.0100013	0.010484	0.0121189	0.0103776	0.00984661	0.00788966	0.00940837
BENZALKONIUM	0.00295554	0.00363916	0.00326683	0.00352348	0.002692	0.00319493	0.00320234	0.00345466	0.00322689	0.0034249	0.00348714	0.0032416
Benzenamine, 3,3',3''-methylidynetris[5-methyl-4-(pentyloxy)-	0.00151512	0.00244759	0.002623	0.00433329	0.0119856	0.00654165	0.00474287	0.00341237	0.00407045	0.00478249	0.00652801	0.0061835
Benzene	0.00231587	0.00204796	0.00235699	0.00170349	0.00209286	0.00206749	0.00199188	0.00227178	0.00208833	0.00222186	0.00225176	0.00233472
Benzene, 1,1',1'',1''',1'''',1'''''-(bi-2-cyclopropen-1-yl)-1,1',2,2',3,3'-hexaylhexakis-	0.02211	0.0156611	0.0304603	0.0224056	0.0200918	0.0324521	0.0252664	0.0362135	0.0350183	0.0429544	0.042815	0.0410853
Benzene-1,2,4,5-tetracarboxylic acid--1,10-phenanthroline (3/4)	0.0116403	0.0188461	0.010188	0.0169339	0.030178	0.00512935	0.0102886	0.0334688	0.0155495	0.0266431	0.014972	0.00351649
benzene-1,4-diylbis{[2,4,6-tri(propan-2-yl)phenyl]methanone}	0.0350905	0.0289607	0.0753471	0.0466742	0.0304862	0.0242786	0.0331549	0.0606135	0.0483612	0.0221998	0.0276539	0.0456568
Benzenesulfonamide, N-(2-benzoylphenyl)-4-(pentyloxy)-	0.0117201	0.0353937	0.00793632	0.0187802	0.0132741	0.0142625	0.0230422	0.0125703	0.00941718	0.00995394	0.00532149	0.00837301
Benzenesulfonic acid, 3,3'-azobis[6-[2-(4-nitro-2-sulfophenyl)ethenyl]-	0.00482392	0.00685054	0.00422181	0.00432377	0.00505483	0.00468466	0.0045492	0.00598996	0.00527058	0.00292833	0.00324032	0.00356222
Benzenesulfonic acid, o-((2-aminoethyl)dithio)-	0.0057257	0.00524474	0.00519002	0.00471529	0.00905589	0.00922979	0.00666608	0.00542275	0.00368987	0.00439215	0.00435771	0.00573108
Benzo[a]pyrene-9,10-oxide	0.011426	0.000861463	0.012398	0.0405364	0.0414306	0.0748053	0.0378968	0.0549411	0.0189334	0.00379711	0.011671	0.0126694
Benzothiazolium, 5-methoxy-2-[[5-methoxy-3-(3-sulfopropyl)-2(3H)-benzothiazolylidene]methyl]-3-(3-sulfopropyl)-, inner salt, compd. with N,N-diethylethanamine (1:1)	0.00133032	0.000370882	0.000905345	0.000770466	0.000887204	0.00101418	0.00312407	0.00164527	0.000400949	0.000104933	0.00272065	0.0011196
Benzoyl phosphate	0.00468178	0.00499735	0.00535463	0.00512414	0.0057199	0.00582347	0.00328439	0.00824779	0.00412531	0.00418074	0.00390572	0.00577248
Benzyl beta-primeveroside	0.0105241	0.119028	0.0141609	0.0791621	0.0147175	0.034808	0.099728	0.0717969	0.0232448	0.0387042	0.017696	0.0193109
Bepridil	0.000915	0.0017155	0.00280583	0.00147632	0.0013848	0.00157377	0.00177567	0.00191927	0.00169512	0.00121133	0.00297822	0.00243563
Beta-1,4-D-Mannosylchitobiosyldiphosphodolichol	0.00844107	0.0269622	0.00948524	0.0151309	0.0309521	0.0145595	0.00420587	0.0257777	0.0206578	0.0202987	0.00953313	0.00652398
beta-Alanine	0.0193751	0.0237746	0.00905108	0.0135605	0.0186588	0.0187041	0.0254938	0.0170366	0.0118222	0.0215294	0.00822338	0.0186534
beta-Alanine, N-(7-oxo-1,3,5-cycloheptatrien-1-yl)-, 2-(diethylamino)ethyl ester, citrate (1:1)	0.0307655	0.0314605	0.0194427	0.0103776	0.0178666	0.0197689	0.0263998	0.0165634	0.0148329	0.0162446	0.00573945	0.0268681
Beta-Carboline	0.0222518	0.0276237	0.0204759	0.0223546	0.0243084	0.0293626	0.0341535	0.0312018	0.0305244	0.0299147	0.0252993	0.0322354
beta-D-Glucosyl-1,4-N-acetyl-D-glucosaminyldiphosphoundecaprenol	0.00692875	0.00630993	0.00611178	0.00598288	0.00669212	0.00620225	0.00620019	0.00579302	0.00673471	0.00579598	0.00628961	0.0060926
Betaine	0.0080612	0.0282355	0.00834642	0.0156122	0.0840472	0.0187876	0.0297711	0.0246258	0.0903178	0.0334139	0.0493496	0.0408534
Bikojic acid	0.00150654	0.00158515	0.00129734	0.00134855	0.00273385	0.00185513	0.00182747	0.00141216	0.00207387	0.00186119	0.00185318	0.00237661
Bilirubin	0.00952266	0.0120697	0.00528052	0.00599018	0.00802601	0.00923805	0.0103378	0.00636355	0.00573355	0.00483838	0.00515956	0.00911092
Biotin sulfone	0.000503446	0.000256886	0.000583963	0	0.000835028	0.000732845	0.00319386	0.00187019	0.000387398	0.00026491	0.000262596	0.00051475
Bis(4-{[4-(hexadecyloxy)benzoyl]oxy}phenyl) heptanedioate	0.141516	0.111264	0.0465231	0.0812712	0.0957272	0.101893	0.0592227	0.0644655	0.0298637	0.0185214	0.0600641	0.087171
Bis[({[(propan-2-yl)oxy]carbonyl}oxy)methyl] [({(2R)-1-[6-({[(propan-2-yl)oxy]carbonyl}amino)-9H-purin-9-yl]propan-2-yl}oxy)methyl]phosphonate	0.00527535	0.00790854	0.0110599	0.00898718	0.0065938	0.0158058	0.0305591	0.00742123	0.00476815	0.0030707	0.0232579	0.00406306
bis[1,5-bis(oxolan-2-yl)pentan-3-yl] hexanedioate	0.00127509	0.00196812	0.00411338	0.00442591	0.00444742	0.00256951	0.00402295	0.00451551	0.0033332	0.00374036	0.00373202	0.0042216
Bisdiphosphoinositol tetrakisphosphate	0.00261875	0.00232233	0.00222392	0.00247712	0.00259551	0.00244213	0.00258206	0.00241641	0.00221214	0.00249705	0.00221211	0.00285219
Blumenol C glucoside	0.04013	0.0153812	0.0221627	0.0458377	0.028526	0.00777701	0.0797783	0.075229	0.0146382	0.0407833	0.0352923	0.0114198
Bordetella pertussis lipid A	0.00878	0.0118799	0.00739501	0.0108348	0.00269886	0.00324171	0.00697297	0.00886964	0.0108548	0.00884091	0.0154431	0.0089516
Bradykinin potentiator C	0.0331571	0.0342482	0.0239941	0.0139978	0.00327381	0.00774248	0.00487543	0.0131898	0.0232415	0.0328347	0.0154216	0.0174384
Brassicanal C	0.0621621	0.0528508	0.124303	0.108382	0.0193844	0.0155585	0.0640644	0.0783665	0.0243702	0.0630818	0.0334199	0.0123187
Brassinolide	0	0.00310209	0.0075411	0.0087788	0.00857588	0.00542123	0.00738544	0.00998141	0.00574555	0.00242695	0.00831852	0.0094759
Brevetoxin B4b	0.017182	0.0164107	0.00793059	0.0106907	0.00768565	0.0198904	0.0178032	0.00618394	0.0168046	0.00868046	0.00553126	0.0161229
Brincidofovir sodium	0.0407919	0.0357105	0.037208	0.0748379	0.0663476	0.0339597	0.0714656	0.0431805	0.0458268	0.0495111	0.0383284	0.0549125
Buprenorphine	0.0243566	0.0475048	0.0321994	0.0350739	0.015916	0.0179074	0.0249625	0.0299986	0.0324691	0.0250087	0.0182095	0.0132889
Butorphanol	0.00614631	0.00541407	0.0119753	0.00523661	0.00130194	0.00575734	0.00756315	0.0138424	0.00331406	0.00762573	0.00566465	0.00681539
Butotricin	0.0292637	0.0384504	0.0381987	0.03377	0.0360422	0.0407929	0.0701277	0.0378846	0.0450772	0.0259145	0.0289163	0.0321583
C.I. Acid Green 50	0.000136741	0	0.000649402	0.000510509	0.000453015	0.000313203	0.00220265	0.00139571	0	0	0.0017874	0.000386309
C.I. Food Black 1	0.00318975	0.0035594	0.00377636	0.00411498	0.00252178	0.00284673	0.0044151	0.00400269	0.00449212	0.0036117	0.00446505	0.00446494
C16 Sphinganine	0.156802	0.0917544	0.104424	0.148057	0.120218	0.180023	0.10229	0.134255	0.104544	0.134637	0.203658	0.154798
C18-Fura-2	0.00501169	0.0131051	0.0042843	0.00772201	0.0163951	0.00648663	0.00141179	0.0129718	0.0102964	0.00942511	0.00434223	0.00251646
Cabergoline	0.00422327	0.00325379	0.00866307	0.00725415	0.00532353	0.00507908	0.00806901	0.00707676	0.00538984	0.00579599	0.00705631	0.00601243
Cadmium salicylate	0.0712997	0.0867164	0.0704854	0.0692311	0.0710785	0.0756969	0.0434492	0.081128	0.0476061	0.0426595	0.0343462	0.0491809
Cadmium--zinc (1/3)	0.022178	0.0225773	0.022735	0.0231117	0.0251146	0.0252699	0.0222957	0.0242517	0.0269364	0.0210095	0.0200822	0.0283799
Cadmium--zinc (3/1)	0.0487378	0.0668495	0.154549	0.117607	0.0708207	0.0689718	0.137496	0.0632828	0.0640001	0.207864	0.14615	0.116678
Caffeoylcycloartenol	0.00695885	0.00708521	0.00927942	0.00886568	0.00929063	0.00788643	0.00822497	0.00934613	0.00823228	0.00950568	0.00802406	0.00947182
Camalexin	0.0888107	0.0938259	0.0934748	0.0890206	0.092794	0.0960517	0.0891258	0.0925044	0.0882875	0.0907376	0.0928932	0.0951877
Camellianin A	0.00924955	0.0146803	0.00597685	0.00268455	0.00600032	0.00665001	0.00956932	0.00434965	0.00398363	0.00364925	0.000282962	0.00683621
Campestanol	0.00224988	0.00197623	0.00245407	0.00219946	0.00346586	0.00193743	0.00216491	0.00384901	0.00344597	0.00336689	0.00261918	0.00245061
Campesterol 6'-(9Z-octadecenoyl)-glucoside	0.00394291	0.00247361	0.00649966	0.00176068	0.00597807	0.00232469	0.00393849	0.0109492	0.00517932	0.00705958	0.00068948	0.00177655
Canavalioside	0.0201344	0.017819	0.0276875	0.0173336	0.0118794	0.015197	0.0119004	0.0121865	0.0119811	0.0135286	0.0115364	0.0112185
Canavalmine	0.00653335	0.0348233	0.00553941	0.043789	0.0425934	0.036966	0.0379502	0.0276374	0.0338662	0.0314321	0.0320033	0.0295481
Capryloylglycine	0.00507493	0.00195305	0.00193309	0.00317597	0.00247864	0.00209625	0.00380448	0.00220932	0.00216236	0.00123232	0.0018459	0.00212811
Capsianoside I	0.00240341	0.00215496	0.00200836	0.0031899	0.00307924	0.00290013	0.00339429	0.00412515	0.00337591	0.00324096	0.00228474	0.00280146
Capsoside A	0.00980913	0.0117559	0.0240787	0.0101278	0.00282971	0.00795032	0.00996722	0.0115715	0.00514408	0.0139687	0.00723104	0.00363404
Carbamic acid, (5-((3-amino-2,3-dihydro-2-hydroxy-1H-inden-1-yl)amino)-2-hydroxy-5-oxo-1,4-bis(phenylmethyl)pentyl)-, 1,1-dimethylethyl ester, (1S-(1a(1R*,2R*,4S*),2alpha,3alpha))-	0.0232393	0.0225315	0.0224916	0.0208488	0.0251465	0.0230454	0.0216022	0.0240475	0.0223685	0.0204082	0.0211327	0.022948
Carbonic acid, 4-[[2-amino-4-[(1-oxooctadecyl)amino]phenyl]amino]phenyl ethyl ester	0.236817	0.240654	0.182984	0.198431	0.132233	0.148616	0.1428	0.176908	0.163595	0.162879	0.125749	0.181964
Carissanol	0.00753807	0.0089422	0.0121274	0.00661832	0.00355057	0.00937018	0.00877658	0.0222355	0.010855	0.0110539	0.0064029	0.0108627
Casimiroin	0.0554303	0.0683894	0.0611174	0.0670332	0.0667365	0.0655412	0.0612453	0.0735206	0.0903418	0.0724479	0.0565662	0.0661145
Caspofungin	0.07644	0.0913498	0.0793689	0.0706368	0.036979	0.054572	0.0428589	0.0542269	0.0789129	0.0888081	0.0758071	0.0934822
Cavipetin B	0.000184502	0.00045888	0.00296962	0.00323903	0.0029271	0.00203569	0.000433187	0.00391659	0.00363744	0.000416369	0.000647433	0.00163819
Cdc2 peptide (9-19)	0.0163264	0.0138746	0.00576148	0.00859865	0.0122569	0.0121415	0.00735779	0.00748309	0.00392017	0.00240581	0.00836014	0.0120028
CDP-DG(16:0/20:4(5Z,8Z,11Z,14Z))	0.00587092	0.00467825	0.00815009	0.00296592	0.00867752	0.00441627	0.00708713	0.0159186	0.00817226	0.010161	0.0018112	0.00379656
CDP-DG(18:0/20:4(5Z,8Z,11Z,14Z))	0	0.000393798	0.00131018	0.00192096	0.00210302	0	0.00313722	0.00437317	0	0.00255055	0.00235181	0.00302837
CDP-DG(18:2(9Z,11Z)/a-15:0)	0.0154604	0.000767959	0.0162743	0.0167115	0.0124733	0.0326171	0.00896999	0.0111237	0.0394723	0.0224676	0.0186998	0.00863574
CDP-DG(18:2(9Z,11Z)/i-24:0)	0.0211219	0.021168	0.0179199	0.0181975	0.0107082	0.0142805	0.0141413	0.0182448	0.0214866	0.0153879	0.0212578	0.0229885
CDP-DG(a-13:0/i-12:0)	0.00955873	0.00538996	0.00986816	0.00322105	0.00256911	0.007583	0.00881687	0.00661227	0.00617255	0.0058807	0.00771914	0.00607158
CDP-DG(a-13:0/i-14:0)	0.00200155	0.00262867	0	0.000290206	0.000220044	0.000803615	0.0038019	0.000224468	0	0.000289571	0	0.000593995
CDP-DG(a-15:0/a-25:0)	0.0190935	0.0209918	0.00624369	0.00442708	0.00648164	0.00288572	0.00603907	0.00423421	0.00402296	0.00347349	0.00487272	0.00318681
CDP-DG(a-21:0/i-22:0)	0.00314954	0.00303424	0.00352516	0.00353244	0.00263541	0.00278908	0.00307194	0.00379303	0.00397474	0.00322538	0.00378337	0.00320606
CDP-DG(a-21:0/i-24:0)	0.0336419	0.0348414	0.0300566	0.0326954	0.0284556	0.0281417	0.0287816	0.0332377	0.0357092	0.0276056	0.0340076	0.0387716
CDP-DG(a-25:0/i-22:0)	0.00245398	0.00238915	0.00208011	0.00233352	0.00230079	0.00229526	0.00207026	0.00213953	0.00240033	0.00236947	0.00237577	0.00273456
CDP-DG(i-24:0/i-24:0)	0.0140189	0.0129234	0.0131193	0.0121299	0.0139095	0.0132711	0.0123579	0.01225	0.0138822	0.012672	0.0131123	0.0123647
Cefminox sodium heptahydrate	0.0164001	0.0147566	0.0162555	0.0138696	0.0147618	0.0129778	0.0135527	0.00791863	0.0017747	0.00146832	0.00112197	0.00122327
Cefprozil	0.00406846	0.00215301	0.00242134	0.00232371	0.00196031	0.00422462	0.00488078	0.00240626	0.0017	0.00102628	0.00707699	0.00141986
Ceftezole sodium	0.0027725	0.00388611	0.00423633	0.00359173	0.00305458	0.00310466	0.00463081	0.00319892	0.00462099	0.00531923	0.00350441	0.00368834
Ceftriaxone	0.00845719	0.0174812	0.0166591	0.0164314	0.0139525	0.0129531	0.0236349	0.0137749	0.0148048	0.0160803	0.0116896	0.0107857
Celastrol	0.00353226	0.00354802	0.00495846	0.00374272	0.00206923	0.00246438	0.00348874	0.00413989	0.00435773	0.00310522	0.00265828	0.00404894
Cer(d14:1(4E)/24:0(2OH))	0.00285175	0.00231883	0.00271213	0.00266348	0.00207914	0.0023524	0.00161146	0.00278708	0.00240654	0.0018575	0.00231712	0.00230318
Cerium(3+) trihydride	0	0	0	0	0.0693195	0	0	0.0714592	0.0648038	0.0743513	0.0606219	0.0460051
CerP(d18:1/24:1(15Z))	0.00215051	0.00301132	0.00467085	0.00522214	0.0146329	0.00624593	0.00565349	0.00489652	0.00493944	0.00588164	0.00777653	0.00692659
Cerulenin	0.00575272	0.00714852	0.00751222	0.00712815	0.00466525	0.00691594	0.0044122	0.00751748	0.00803069	0.00706922	0.00769491	0.00753094
Cervonoyl ethanolamide	0.00289054	0.0116976	0.00041146	0.000399171	0.00837204	0.00327681	0.000963202	0.00760044	0.00362801	8.47e-05	0.00369611	0.0151095
Chikusetsusaponin VI	0.013612	0.00900237	0.0124465	0.0116731	0.0213075	0.0240221	0.014934	0.0119916	0.0116144	0.00819262	0.0133293	0.0210061
Chinenoside VI	0.00688965	0.00445566	0.0094096	0.0143284	0.00380674	0.00987411	0.0040102	0.0106674	0.00586949	0.00928293	0.00429675	0.00277326
Chivosazole C	0.00426824	0.00241182	0.0026305	0.00274881	0.00136901	0.00158282	0.00155498	0	0.000238497	0.000266828	0.00050776	0.00102898
Chivosazole F	0.0111074	0.0319108	0.00977413	0.00848641	0.00726708	0.0112678	0.0147686	0.0121641	0.00570149	0.00646581	0.00415157	0.00839235
Chlorin E6	0.00329863	0.00258572	0.00172109	0.00256224	0.00341672	0.00260876	0.00280194	0.00297749	0.00198501	0.0017644	0.00122506	0.00228178
Cholestane-3,7,12,25-tetrol-3-glucuronide	0.0165226	0.017847	0.00827604	0.00619356	0.0106221	0.0097869	0.0127295	0.0118194	0.00717472	0.00472731	0.00517437	0.00753514
Choline	0.0241935	0.140449	0.165235	0.173807	0.141328	0.0981304	0.137829	0.201375	0.180387	0.106521	0.116539	0.162737
Chymostatin	0.462047	0.422937	0.293974	0.359081	0.372673	0.37401	0.315776	0.334215	0.248034	0.191546	0.339016	0.42778
Cilazapril	0.007164	0.00730166	0.00707887	0.00336649	0.00415932	0.0063268	0.00663249	0.00596238	0.00436928	0.0114142	0.00312403	0.00768876
Cincassiol B	0.0028401	0.00272182	0.00363796	0.00335049	0.00535237	0.00456586	0.00487275	0.0109716	0.00904296	0.00833226	0.00533381	0.00684508
Cinitapride	0.00166209	0.00413169	0.00136483	0.00198421	0.00221133	0.00195093	0.0039339	0.00169587	0.00178083	0.004063	0.00341471	0.00263532
cis-4-Hydroxycyclohexylacetic acid	0.0114177	0.00866791	0.0144054	0.0102691	0.0118385	0.00999295	0.0182841	0.00944652	0.00752489	0.00630502	0.00756919	0.00938778
cis-5-Tetradecenoylcarnitine	0.0177941	0.0124117	0.0156734	0.0134481	0.0129709	0.0239541	0.0127896	0.0427025	0.0188567	0.0224666	0.0203561	0.0213194
cis-Aconitic acid	0.0938011	0.0520371	0.0515781	0.0491172	0.0759765	0.0873756	0.0726272	0.0375155	0.0256221	0.0281218	0.0235038	0.0445721
Cis-zeatin	0.0325649	0.0525905	0.0367655	0.039817	0.0403042	0.0322373	0.0336689	0.0353393	0.0251207	0.0394507	0.0192516	0.0244976
Cis-zeatin-7-N-glucoside	0.198767	0.239059	0.211138	0.172348	0.167449	0.186256	0.182966	0.41718	0.209494	0.292452	0.211666	0.296191
Citbismine C	0.0191267	0.0175094	0.0124564	0.014931	0.0166814	0.0166095	0.0126881	0.0154186	0.0100244	0.00787796	0.0153268	0.0158387
Citicoline	0.00083313	0.0013686	0.00112661	0.000884897	0.000712816	0.00182209	0.00268704	0.000978013	0.000572739	0.000319481	0.00363677	0.000555668
Citramalic acid	0.00946097	0.00999001	0.0081297	0.00940859	0.0100331	0.0168376	0.00878118	0.00966825	0.00962689	0.00722991	0.0236961	0.00995743
Citranaxanthin	0.0142332	0.0131722	0.0222992	0.0229716	0.0248299	0.0178161	0.0216194	0.0240267	0.0186965	0.020821	0.0213747	0.0234939
Citric acid	1.99249	1.77238	1.63737	1.49106	2.56629	2.673	1.85212	1.46163	0.89535	1.04719	0.805931	1.36429
Citrulline	0.0192867	0.0229679	0.0164145	0.0181546	0.0201736	0.0187107	0.0219755	0.0207231	0.0163179	0.0198151	0.0172899	0.0214688
CL(16:0/16:1(9Z)/16:1(9Z)/22:6(4Z,7Z,10Z,13Z,16Z,19Z))	0.00393151	0.00433063	0.00497994	0.00393653	0.00773865	0.00655452	0.00351921	0.00676576	0.00475674	0.00527371	0.00356073	0.00425934
CL(16:1(9Z)/16:1(9Z)/16:0/16:0)	0.0072796	0.00869323	0.00593006	0.00690234	0.00612824	0.0106499	0.0123235	0.00432878	0.00903599	0.0077666	0.00409282	0.0078895
CL(16:1(9Z)/16:1(9Z)/16:1(9Z)/22:6(4Z,7Z,10Z,13Z,16Z,19Z))	0.00565963	0.00524144	0.00337879	0.00551653	0.00326841	0.00656539	0.00620152	0.00332096	0.00503292	0.00375535	0.00260355	0.00378257
CL(16:1(9Z)/16:1(9Z)/18:2(9Z,12Z)/22:6(4Z,7Z,10Z,13Z,16Z,19Z))	0.0121201	0.0240547	0.0224094	0.0247957	0.0195419	0.016603	0.0200629	0.016703	0.0175205	0.0259721	0.0214328	0.0158875
CL(8:0/13:0/18:2(9Z,11Z)/18:2(9Z,11Z))	0.0162258	0.0151996	0.00853451	0.00907825	0.00700063	0.0185575	0.0173388	0.00424874	0.0161044	0.00836119	0.00510943	0.014729
CL(8:0/14:0/18:2(9Z,11Z)/18:2(9Z,11Z))	0.0145622	0.0157844	0.0165844	0.0157749	0.0171115	0.0166797	0.0156839	0.0180535	0.0187303	0.0179469	0.0164217	0.0167696
CL(8:0/8:0/10:0/18:2(9Z,11Z))	0.00509718	0.00452629	0.00699372	0.00612081	0.00237811	0.00438008	0.00275899	0.00467724	0.00520209	0.00581216	0.00577676	0.00664419
CL(8:0/8:0/13:0/18:2(9Z,11Z))	0.0496106	0.0500338	0.0389448	0.0363093	0.0297873	0.0401051	0.0311277	0.0492699	0.0490089	0.029175	0.0360755	0.0604223
CL(8:0/8:0/15:0/18:2(9Z,11Z))	0.0039243	0.00421419	0.00519475	0.00557063	0.00904977	0.0084326	0.00785052	0.00626936	0.00626547	0.00609575	0.00361624	0.00621788
CL(8:0/8:0/8:0/15:0)	0.00726559	0.00988327	0.0187591	0.0110875	0.00264188	0.00372926	0.00526171	0.00666447	0.00831824	0.0195918	0.0112599	0.0094769
CL(8:0/8:0/8:0/16:0)	0.0119308	0.018201	0.0132749	0.0159566	0.0131077	0.0108469	0.0150813	0.0121528	0.0141845	0.0104816	0.0112047	0.0101143
CL(8:0/8:0/8:0/18:0)	0.0165063	0.019107	0.0244925	0.0203693	0.00822972	0.0134664	0.0133368	0.0175495	0.0190042	0.0264447	0.0240776	0.0222478
CL(8:0/8:0/8:0/18:2(9Z,11Z))	0.00898117	0.0246799	0.0107339	0.005993	0	0.00433343	0.00667136	0.00547126	0.0284496	0.0252465	0.00231998	0.0291691
CL(8:0/8:0/8:0/19:0)	0.0128096	0.0129003	0.0138903	0.0136666	0.00920029	0.0125268	0.0077585	0.0156984	0.00718576	0.0145771	0.0143189	0.0154671
CL(8:0/8:0/8:0/20:0)	0.00571276	0.00536972	0.00501357	0.00526176	0.00641211	0.0058834	0.00327025	0.00645652	0.00611064	0.00436585	0.00436367	0.0054486
CL(8:0/8:0/8:0/21:0)	0.452519	0.482032	0.372707	0.387992	0.225383	0.29574	0.289511	0.400944	0.47307	0.331817	0.45788	0.510256
CL(8:0/8:0/8:0/23:0)	0.0351146	0.0389716	0.0445996	0.0506755	0.0539363	0.0488287	0.0491584	0.0542212	0.0521707	0.0469111	0.0419589	0.0486101
CL(a-13:0/a-25:0/18:2(9Z,11Z)/a-25:0)[rac]	0.010669	0.0120044	0.00612844	0.00649868	0.00468344	0.0153294	0.0131272	0.00432383	0.0113459	0.00539372	0.00386674	0.010662
CL(a-13:0/i-16:0/18:2(9Z,11Z)/18:2(9Z,11Z))[rac]	0.00524712	0.00555339	0.00351901	0.00606958	0.0033042	0.00653349	0.00629407	0.00278355	0.00520826	0.00379554	0.00255349	0.00500391
CL(i-12:0/18:2(9Z,11Z)/a-15:0/18:2(9Z,11Z))[rac]	0.0152458	0.0262843	0.0368635	0.0286749	0.0191396	0.0184444	0.0216739	0.0303013	0.0320766	0.0242301	0.0313514	0.0346689
CL(i-12:0/18:2(9Z,11Z)/i-12:0/i-13:0)	0.0692932	0.0756769	0.0763787	0.0667066	0.115927	0.106191	0.0524779	0.103839	0.0788846	0.0653964	0.0562087	0.0846695
CL(i-14:0/i-12:0/i-13:0/18:2(9Z,11Z))	0.00676717	0.00691238	0.00523028	0.00603727	0.0075798	0.00759628	0.00496173	0.00759391	0.00703832	0.00565392	0.00505623	0.00676672
Clusin	0.00358794	0.0116818	0.00504659	0.00341465	0.00277771	0.00520743	0.00418587	0.0125843	0.00473339	0.00673361	0.00848251	0.00753461
Coagulin R 3-glucoside	0.0443762	0.0371983	0.027406	0.0413017	0.0202256	0.0210523	0.0309	0.0290072	0.020283	0.0148083	0.0234753	0.0256921
Cohibin A	0.00688606	0.00948749	0.0129137	0.0126019	0.0128578	0.0108482	0.0132422	0.0134831	0.0136874	0.012315	0.0117043	0.0140069
Collettiside I	0.00324743	0.00407911	0.00297469	0.00399224	0.00730818	0.0182019	0.0047045	0.0114594	0.00821309	0.0319307	0.00856996	0.00543456
Convalloside	0.0660387	0.0690309	0.105487	0.0922642	0.00686295	0.0189039	0.0139974	0.0458931	0.0730803	0.141662	0.0906243	0.0723778
Coriandrone D	0.00810515	0.013976	0.00763133	0.0121352	0.00963081	0.0180952	0.0102711	0.0228662	0.00710156	0.00812481	0.0149092	0.0127373
Cortexolone	0.0203051	0.0165233	0.0207337	0.0187138	0.0188689	0.0160768	0.0233943	0.0142894	0.0189822	0.0208073	0.01602	0.0169817
Coumarin-4-carboxylic acid	0.011542	0.0133648	0.0138221	0.0118614	0.0146476	0.0138709	0.0137704	0.00977999	0.00672574	0.00684979	0.00633902	0.00919068
Creatine	0.0121979	0.0100782	0.00538371	0.0062463	0.0137491	0.00917139	0.00942203	0.00671233	0.0073031	0.00976867	0.0060553	0.00702287
Creatinine	0.00526546	0.00453568	0.00289653	0.00334561	0.00730593	0.00457126	0.0046471	0.00363203	0.00456189	0.00595493	0.00410755	0.00346032
Crustecdysone	0.0186491	0.0207069	0.029038	0.0228102	0.0123634	0.0126238	0.0177968	0.0187829	0.0180781	0.0259222	0.0189521	0.0182439
Cryptodorine	0.0247754	0.0252101	0.0122302	0.0257077	0.0225359	0.0600702	0.0414437	0.0422328	0.0212162	0.0162112	0.010718	0.0290626
CTK1B6832	0.00211129	0.00245915	0.00441161	0.00289727	0.000847615	0.00152333	0.00156433	0.00339283	0.00319919	0.00299985	0.00343899	0.0029903
CTK1D0947	0.0140444	0.0204655	0.0140949	0.0167046	0.0129354	0.0131118	0.0153548	0.021523	0.0191836	0.0215222	0.0102468	0.0171365
CTK1D1137	0.0133789	0.0110344	0.00651486	0.00898915	0.00581325	0.0052583	0.00325689	0.00301375	0.00467338	0.00116694	0.00335416	0.00389227
CTK2I3006	0.0169635	0.0554345	0.0107201	0.0131032	0.0164207	0.00568933	0.0196609	0.00830835	0.0103081	0.00293926	0.00172612	0.00738544
Cubebinone	0.0293317	0.0312275	0.0175023	0.0173394	0.0393298	0.0406079	0.028039	0.0184299	0.0154731	0.0124807	0.00944338	0.016334
Cucurbic acid	0.0046908	0.0079636	0.00964603	0.00915641	0.00504404	0.00850096	0.0073216	0.0135919	0.00637923	0.00530249	0.00909691	0.00769367
Cucurbitacin D	0.0738479	0.0638283	0.0437737	0.0522301	0.0757125	0.0760629	0.0550184	0.0795638	0.0605532	0.042124	0.0512215	0.0634129
Cucurbitacin E	0.00849838	0.00595152	0.00487796	0.00406945	0.00131153	0.0015011	0.000938874	0.00324765	0.00410189	0	0.00294499	0.00374851
Cyanidin 3-glucogalactoside	0	0.00167479	0.00554532	0.00433372	0.00462513	0.00508424	0.0132761	0.00718048	0.00126168	0.00119689	0.0133228	0.00308818
Cycloartomunoxanthone	0.0308503	0.0361247	0.022493	0.0132475	0.0209384	0.0227039	0.0254228	0.0358312	0.020993	0.0246155	0.0104873	0.0316765
Cyclolinopeptide A	0.657868	0.718101	0.621986	0.684245	0.347562	0.393852	0.542051	0.601939	0.686136	0.612933	0.841905	0.625182
Cyclotricuspidogenin C	0.0136293	0.0173165	0.00909898	0.00582743	0.0117883	0.0082956	0.0122569	0.00998681	0.00806657	0.00359693	0.00431507	0.0072681
Cys Lys Lys Arg	0.0454229	0.0432564	0.0468675	0.0386458	0.0391496	0.0392375	0.0403367	0.0481253	0.0459252	0.0424652	0.0424618	0.0503892
Cytidine, 2',3'-didehydro-2',3'-dideoxy-, 5'-(hydrogen methylphosphonate)	0.00572052	0.0202417	0.0119701	0.0285592	0.021849	0.0120463	0.011179	0.00893266	0.0219545	0.0318603	0.0168657	0.0140987
Cytochalasin Opho	0.0491197	0.0482022	0.0449437	0.0607938	0.0395211	0.0429044	0.0396198	0.039177	0.0247829	0.0303023	0.039645	0.0425456
Cytochalasin Ppho	0.0168981	0.00374244	0.0132966	0.012764	0.020439	0.0204218	0.0189315	0.0133106	0.0184029	0.0126108	0.0104385	0.0134813
d(Cgcg)	0.00715992	0.00870577	0.00966929	0.00812621	0.0122812	0.00887698	0.00773295	0.0113847	0.0101955	0.0097897	0.00702971	0.00745706
Dabigatran etexilate	0.0234336	0.0279209	0.0184482	0.0237592	0.0221245	0.0193139	0.0243398	0.047786	0.0196596	0.0141273	0.0190964	0.0250374
Daphniphylline	0.280527	0.374851	0.363913	0.320726	0.236516	0.246527	0.243313	0.303527	0.318032	0.364988	0.265003	0.327378
Dapiprazole	0.0185967	0.0193635	0.015198	0.0154836	0.0140193	0.0196912	0.0149485	0.0189467	0.0165581	0.016927	0.0176509	0.0184427
D-Arginine, N2-((5-((4,6-dideoxy-4-(methylamino)-3-O-beta-D-xylopyranosyl-beta-D-galactopyranosyl)oxy)-5,6,8,13-tetrahydro-1,6,9,14-tetrahydroxy-11-methoxy-3-methyl-8,13-dioxobenzo(a)naphthacen-2-yl)carbonyl)-, (5S-trans)-	0.0019222	0.00259798	0.0031032	0.0024335	0.00533176	0.00329226	0.002069	0.00435365	0.00272057	0.00248088	0.00223617	0.00334778
Daucic acid	0.0240144	0.061815	0.0489216	0.0592186	0.0410314	0.0305794	0.029811	0.0267725	0.0448177	0.0551376	0.0519808	0.0395038
Debrisoquine	0.00721219	0.00609664	0.005752	0.00700033	0.00870609	0.00841247	0.00715419	0.00820452	0.00605481	0.00769844	0.00742477	0.00751001
Decanoic acid, monoamide with N-(2-aminoethyl)-1,2-ethanediamine	0.023515	0.0207271	0.019817	0.014762	0.0140331	0.0172039	0.015258	0.0206067	0.0176536	0.0198823	0.0212513	0.0168513
decanoic acid; 3-[3-[3-[3-[3-[3-[3-[3-[3-(2,3-dihydroxypropoxy)-2-hydroxy-propoxy]-2-hydroxy-propoxy]-2-hydroxy-propoxy]-2-hydroxy-propoxy]-2-hydroxy-propoxy]-2-hydroxy-propoxy]-2-hydroxy-propoxy]-2-hydroxy-propoxy]propane-1,2-diol; octanoic acid	0.0216913	0.0118587	0.0173366	0.0179814	0.0211316	0.0220427	0.0286222	0.0191691	0.0234941	0.0279513	0.0261008	0.0252193
Decanoylcarnitine	0.00249014	0.00253688	0.00325147	0.00304404	0.00216026	0.00312345	0.00259606	0.00454874	0.00339727	0.00288924	0.00293192	0.00397096
Decanoylcholine	0.0140894	0.0122734	0.0242158	0.0157701	0.00403455	0.0137805	0.0160657	0.02041	0.00635092	0.013883	0.00789193	0.0115286
Deferoxamine	0.0264062	0.0191985	0.0214062	0.0231518	0.025386	0.0239253	0.0251279	0.0240624	0.0242201	0.0250505	0.0229922	0.0297175
Dehydrocarpaine I	0.0594777	0.0620494	0.060987	0.0593415	0.0572024	0.0569816	0.0559337	0.0616986	0.062497	0.0618726	0.0649235	0.0638164
Dehydrochorismic acid	0.0145502	0.013408	0.0133809	0.0104824	0.0117282	0.00999408	0.0158761	0.0135744	0.0108586	0.0101506	0.0189895	0.00898142
Dehydroxymethylflazine	0.00704895	0.0096903	0.00740149	0.0138259	0.0177092	0.0069357	0.0112471	0.00850932	0.0162957	0.0140993	0.00962209	0.0132029
Delphinidin 3,5-diglucoside	0	0	0.000794065	0.000612053	0.000886695	0.000103861	0.00153516	0.00181881	0	7.48e-05	0.00226916	0.000928711
Delphinidin 3,7,3',5'-tetra(6-O-p-coumaroyl-beta-glucoside)	0.0154565	0.0143954	0.00693994	0.00788922	0.0061185	0.017244	0.015065	0.00525646	0.0131309	0.00692819	0.00455258	0.0136302
delta9-Tetrahydrocannabinol hemisuccinate	0.0132937	0.01081	0.0168787	0.00797868	0.00298958	0.0163401	0.0134052	0.0168807	0.00369479	0.0113845	0.00669625	0.0141505
delta-Amorphene	0.00292789	0.00278497	0.0026607	0.00238028	0.00275363	0.0027886	0.002804	0.00221906	0.00223026	0.00229367	0.00221288	0.00212667
Deltonin	0.0168514	0.023388	0.0272617	0.0345493	0.0239094	0.0252607	0.0192426	0.0243187	0.0196488	0.0255985	0.0196293	0.0169996
Demethylcalabaxanthone	0.0561704	0.468906	0.079655	0.233879	0.0549155	0.151421	0.319315	0.316583	0.0915233	0.165341	0.0767536	0.0731226
Deoxycorticosterone	0.00189722	0.00271951	0.00257744	0.00213795	0.00125245	0.00248727	0.000429769	0.000374384	0.00327904	0.00136048	0.00157575	0.00145471
Deoxyhypusine	0.00997164	0.00598867	0.0123547	0.0198298	0.0066001	0.012736	0.00929069	0.0195492	0.00907262	0.00890653	0.0118301	0.0166746
Deoxynojirimycin Tetrabenzyl Ether	0.00886528	0.0149578	0.0125741	0.0101498	0.00667933	0.00909341	0.00703376	0.00979033	0.0152859	0.0194689	0.0166081	0.0147509
Desglucocoroloside	0.100492	0.111181	0.127323	0.110639	0.0603818	0.0800375	0.0723143	0.0908672	0.113154	0.165974	0.131611	0.128513
Desmosine	0.0088771	0.010888	0.0111139	0.0108298	0.00644163	0.00796529	0.00730675	0.00919212	0.0111488	0.0157014	0.0117465	0.0127278
Deterrol stearate	0.0127181	0.0109704	0.0162912	0.0165554	0.0181722	0.0145819	0.0159789	0.0169151	0.0160656	0.016097	0.0157318	0.0177438
De-tyr-dynorphin(2-13)	0.00301879	0.0036991	0.0036608	0.00360071	0.00415962	0.00437868	0.00291111	0.00382725	0.00424865	0.0042883	0.00328437	0.00398565
Deuteroporphyrin IX	0.0218359	0.0163247	0.0256778	0.0217165	0.0168357	0.0256517	0.022588	0.0331149	0.0266567	0.0353022	0.0411461	0.037858
DG(14:0/22:4(7Z,10Z,13Z,16Z)/0:0)	0.000285501	0.0023339	0.00277218	0.000837625	0.000323007	0.000588243	0.000222038	0	0.000533667	0.000114312	7.71e-05	6.3e-05
DG(14:1(9Z)/14:1(9Z)/0:0)	0.0125183	0.0167389	0.0203276	0.0193873	0.0217088	0.0194008	0.0206009	0.0213368	0.0190123	0.0197998	0.0195193	0.0218275
DG(15:0/18:2(9Z,12Z)/0:0)	0.00487624	0.00374531	0.00547202	0.00540356	0.00551584	0.00513788	0.00513388	0.00507656	0.00571802	0.00507457	0.00488754	0.00527435
DG(15:0/20:2(11Z,14Z)/0:0)	0.00530309	0.00476174	0.00673468	0.0077765	0.00788084	0.00618298	0.00737921	0.00777729	0.0071109	0.00681097	0.00731223	0.00779234
DG(17:0/0:0/17:0) (d5)	0.0193712	0.0243555	0.0359458	0.035346	0.0352603	0.0291669	0.033486	0.0377736	0.0359664	0.0325647	0.0323504	0.0350723
DG(18:0/0:0/22:6n3)	0.00174338	0.00435995	0.00216283	0.00148146	0.00269447	0.00181565	0.00129801	0.00199927	0.00390594	0.00288078	0.00109774	0.00114031
DG(20:0/0:0/18:2n6)	0.00125751	0.00130079	0.0022026	0.00200466	0.00508198	0.00268036	0.00244932	0.00203042	0.00152894	0.0021015	0.00293942	0.00316919
DG(20:5(5Z,8Z,11Z,14Z,17Z)/24:1(15Z)/0:0)	0.0046588	0.00762554	0.0182332	0.007526	0.0078897	0.00738912	0.00818307	0.00750062	0.00810471	0.00867624	0.00714573	0.0075221
DG(8:0/13:0/0:0)	0	0.000497843	0.00428341	0.00486709	0.00557674	0.0021651	0.00337662	0.0068053	0.00213756	0.00264895	0.00469902	0.00645718
DG(9D3/9D3/0:0)	0.00190592	0.00857971	0.00202744	0.0102506	0.011608	0.0090577	0.00943598	0.00971544	0.0107177	0.0095331	0.00888057	0.00942178
D-Glucose	0.548057	0.826733	0.667314	0.799497	1.00708	0.583863	0.669223	0.678661	1.06573	0.913416	0.810329	0.795655
Di-2-propenyl pentasulfide	0.0201954	0.0199592	0.0207171	0.0226815	0.020874	0.0203002	0.018965	0.0229059	0.0257425	0.0261217	0.0260232	0.028978
Dibucaine	0.00356244	0.00315307	0.00729703	0.00487464	0.0018843	0.0034749	0.0045786	0.00580943	0.00267639	0.00480871	0.00375956	0.00429755
Dide-O-methyl-4-O-alpha-D-glucopyranosylsimmondsin	0	0.00113024	0.00135298	0.00119541	0.00140686	0.00152443	0.00237539	0.00258073	0.00121521	0.001909	0.00172351	0.00203121
Didodecyl imidodisulfate	0.513933	0.586798	0.342266	0.43266	0.363829	0.404203	0.314279	0.305997	0.311863	0.224791	0.301879	0.454282
didodecyl phenylphosphonate	0.0276987	0.0299505	0.0302889	0.0338366	0.0317387	0.0342074	0.0364707	0.0394119	0.0451402	0.0483517	0.0498107	0.053513
diethyl 3,3,5,5-tetrakis(2-cyanoethyl)-4-oxocyclohexane-1,1-dicarboxylate	0.0276973	0.00780975	0.00810941	0.0196315	0.0147442	0.00473555	0.0341214	0.0374534	0.0114042	0.0236468	0.0184568	0.00576514
Diethyl pentasulfane-1,5-dicarboxylate	0.0376638	0.0514241	0.0310517	0.0341911	0.0336361	0.0317447	0.0278813	0.0502539	0.0508437	0.0455271	0.0315119	0.0288266
Diethyl tartrate	0.0172909	0.0127078	0.0150576	0.0143663	0.0161673	0.0276198	0.0140156	0.015657	0.0126497	0.0238311	0.0195837	0.0112458
Diethylcarbamazine N-oxide	0.0136985	0.0124558	0.0182036	0.0155499	0.0106039	0.0202272	0.0119557	0.0309577	0.0133248	0.0132024	0.01429	0.0206204
Diethylene triamine penta(methylene phosphonic acid), octasodium salt	0.00711088	0.00721681	0.00767485	0.00669143	0.00783309	0.0072786	0.00639845	0.00679081	0.00776132	0.00733966	0.00705293	0.0074643
Diethylhexyl adipate	0.372659	0.42848	0.427918	0.473376	0.518334	0.541191	0.576685	0.798913	0.886084	0.915337	0.953458	1.05553
Diferuloylputrescine	0.00143167	0.00508748	0.00927682	0.00725052	0.00844988	0.00713123	0.011243	0.0147801	0.00809856	0.00957331	0.00887842	0.0115283
Digadolinium trimagnesium dodecanitrate	0.000645197	0.000669419	0.00182639	0.00135476	0.00151971	0.00126692	0.00175902	0.00159962	0.0014744	0.00132999	0.00114665	0.00177084
Digeranyl	0.0245011	0.0149235	0.0168441	0.022446	0.0194572	0.0291051	0.0170618	0.0217823	0.0178192	0.0230058	0.0328224	0.0242956
Dihomo-gamma-linolenic acid	0.00755283	0.00997719	0.00907943	0.00631414	0.00588395	0.00862678	0.00769864	0.0120634	0.00672148	0.00834276	0.00779166	0.00803999
Dihomolinoleic acid	0.236282	0.230026	0.217986	0.150432	0.14583	0.205357	0.220712	0.271325	0.205114	0.306309	0.26296	0.225379
Dihydro-3(2H)-thiophenone	0.0211702	0.021802	0.0198525	0.0206439	0.0179096	0.0188946	0.0174108	0.0210609	0.0201985	0.021754	0.0207531	0.0223793
Dihydro-4-mercapto-3(2H)-furanone	0.00812585	0.00789764	0.00835318	0.00813728	0.00812143	0.00778655	0.00852887	0.00854417	0.00854838	0.00819174	0.00789318	0.00782626
Dihydroceramide	0.00210326	0.00569724	0.0024607	0.00638735	0.00715286	0.00565429	0.00665089	0.00870312	0.0114557	0.00698683	0.00250384	0.00541727
Dihydroergotamine	0.0127387	0.011318	0.00829771	0.0106336	0.0126388	0.0120469	0.00984725	0.0111781	0.00979832	0.00761839	0.0110106	0.0127371
Dihydronaringenin-O-sulphate	0.0138432	0.0165729	0.0161489	0.0148096	0.00358302	0.0163342	0.000961472	0.014795	0.0131771	0.017606	0.0155357	0.0147288
DIHYDROXY-OXO-AZANIUM	0.0018137	0.00208778	0.00239203	0.00233744	0.0022355	0.00229757	0.00163704	0.00281986	0.0018095	0.0019471	0.00164075	0.00161671
Dihydrozeatin-7-N-dihydrozeatin	0.173156	0.186089	0.138277	0.116411	0.156	0.150229	0.133259	0.341885	0.131599	0.184737	0.120061	0.12616
Diisobutyl adipate	0.00210868	0.00200948	0.00213857	0.00215756	0.0022358	0.00296088	0.00231457	0.00257875	0.00252906	0.0028215	0.00222778	0.00243952
Diisopropyl disulfide	0.00906124	0.0117812	0.0128128	0.00969934	0.00665108	0.0059014	0.00897892	0.00840645	0.0111204	0.0156718	0.00860814	0.00992899
Dimethyl (5-nitrofuran-2-carbonyl)phosphonate	0.0251008	0.0191092	0.0202092	0.0152417	0.00863899	0.0168772	0.0231693	0.0166748	0.00495925	0.0100112	0.00655394	0.0153265
Dimethyl sulfoxide	0.0019677	0.00443399	0.00202302	0.00459177	0.00459554	0.00496985	0.00379515	0.00369148	0.00358913	0.00394476	0.00407022	0.0036194
Dipotassium 2,2'-[2H-1,3,2-benzodioxagermole-2,2-diylbis(oxy)]diphenolate	0.0765279	0.0737518	0.0758641	0.075507	0.0800961	0.077492	0.0753966	0.072251	0.0846038	0.0747974	0.0773924	0.0784835
Diprop-2-en-1-yl (9-{[2-({5-[(4S)-2-oxohexahydro-1H-thieno[3,4-d]imidazol-4-yl]pentanoyl}amino)ethyl]amino}acridine-3,6-diyl)biscarbamate	0.0317086	0.0374143	0.0226141	0.0240776	0.0230429	0.0199887	0.0155894	0.0239335	0.0292599	0.0272516	0.0165769	0.0275852
Ditridecyl phthalate	0.00527717	0.00434385	0.00349149	0.00177774	0.00435225	0.0168134	0.00257805	0.00332386	0.000976728	0.000659145	0.00319433	0.001499
DL-2-Aminooctanoic acid	0.127935	0.112309	0.0777897	0.0940241	0.157002	0.112938	0.114877	0.108235	0.112783	0.12742	0.127215	0.129466
D-Lysine	0.0445619	0.0638538	0.0588422	0.0551568	0.0507975	0.0567625	0.0779074	0.0610881	0.0727042	0.0723643	0.0546868	0.0815019
D-myo-Inositol 1,4-bisphosphate	0.00963307	0.00775815	0.00841104	0.007343	0.00645742	0.00490976	0.00933977	0.00655108	0.00783408	0.00722796	0.0129083	0.00563743
Docosahexaenoic acid	0.00525922	0.00765809	0.0101603	0.00601203	0.00827808	0.00866581	0.0129516	0.0140456	0.00957176	0.0114542	0.0096461	0.0119346
Docosanamide	0	0	0.00417305	0.00126845	0.00453963	0.0277267	0.00349152	0.021972	0.00131571	0.00378022	0.00169019	0.000771073
Docosanoic acid, compound with 2,2'-iminodiethanol (1:1)	0.00203307	0.0017652	0.00196077	0.00152705	0.00296367	0.0016935	0.00161479	0.00290281	0.00302532	0.00308852	0.00204963	0.00215883
Docosapentaenoic acid (22n-6)	0.022331	0.0301169	0.0313752	0.0171112	0.0133849	0.0175097	0.0302823	0.0278914	0.0123965	0.0169618	0.0128747	0.0173125
Dodecanedioylcarnitine	0	0.0017307	0.00926189	0.00818775	0.0107957	0.124978	0.0128182	0.0483995	0.00408925	0.017638	0.0056254	0.00337009
Dodecanoic acid, ammonium salt	0.0160516	0.00848018	0.00934279	0.0178218	0.00980628	0.0212606	0.00988961	0.0118682	0.0108627	0.0127047	0.027176	0.0167386
Dodecanoylcarnitine	0.00215242	0.00224364	0.00260235	0.00224565	0.00272611	0.00272089	0.00235765	0.00241996	0.00241007	0.00229658	0.0020423	0.00222779
Dodecaprenyl diphosphate	0.0117944	0.0105532	0.0103521	0.0084219	0.00961411	0.010722	0.00829989	0.0131466	0.00812293	0.0080731	0.0125554	0.0139177
Dodecyl bis(hydroxyethyl)dioctyl ammonium phosphate	0.00130058	0.00148463	0.00273486	0.00332762	0.0106366	0.00407774	0.00368949	0.00281819	0.00241073	0.00323528	0.0052536	0.00521042
Dodecyl gallate	0.00589178	0.0060655	0.00579028	0.00926591	0.00563651	0.0118291	0.00887131	0.0162306	0.00473842	0.00608725	0.00727862	0.0129961
Dolichyl beta-D-mannosyl phosphate	0.0050035	0.00646518	0.00386419	0.00528877	0.00346954	0.00710021	0.00656171	0.00268749	0.00493605	0.00472215	0.00235092	0.00688094
Donhexocin	0.00700504	0.00835252	0.0121753	0.0120101	0.0126692	0.0111769	0.0109746	0.0126986	0.0133504	0.0115266	0.0106653	0.0124984
Dopaxanthin	0.00224379	0.00103146	0.0014859	0.00142497	0.00111125	0.00286168	0.00303261	0.00145995	0.00111973	0.000674171	0.00449869	0.000667227
Doxapram	0.10785	0.110376	0.105457	0.107601	0.108185	0.10812	0.103961	0.105174	0.108852	0.116019	0.111429	0.122081
Doxycycline	0.00681324	0.0189951	0.0134424	0.00874512	0.00256268	0.00630723	0.00761475	0.0382307	0.00540773	0.00617429	0.00555975	0.00322003
Drotaverine	0.0247139	0.0288158	0.0275164	0.0178748	0.0185631	0.0275206	0.0385195	0.0389225	0.0329264	0.0489288	0.0409825	0.0411489
dUMP	0.00300751	0.000806176	0.00113387	0.000796129	0.00122339	0.00285588	0.00096348	0.00337835	0.0014388	0.00408705	0.00217076	0.00200973
Dynorphin A (6-8)	0.0109901	0.0122155	0.0112231	0.0118042	0.0116652	0.0105973	0.0114379	0.0123672	0.013047	0.0124229	0.0125397	0.012898
Dynorphin B (6-9)	0.0482816	0.0288788	0.0486027	0.0275221	0.00173362	0.00732122	0.00547893	0.0163285	0.0130037	0.0128717	0.0148089	0.0203485
Dysprosium tris(ethyl sulfate)	0.00614137	0.00470023	0.00499667	0.00704459	0.00520085	0.00609173	0.0055365	0.00700587	0.00491741	0.0052823	0.00556363	0.00651101
E-10-Hydroxydesmethylnortriptyline	0.00452025	0.00423115	0.00419951	0.00421429	0.00290094	0.00283116	0.0031953	0.00394817	0.00356341	0.00322334	0.00364287	0.00328334
Ebastine	0.00363963	0.00394206	0.00218712	0.00340611	0.00278779	0.00341654	0.00258325	0.00240537	0.00249494	0.00212802	0.00283217	0.00348954
Ecgonine methyl ester	0.0518694	0.0363259	0.0459684	0.03442	0.031873	0.042451	0.0502825	0.0274841	0.0173117	0.0093238	0.0211101	0.0314469
Eicosanoic acid, compd. with morpholine (1:1)	0.00207936	0.00168719	0.00184295	0.0022052	0.00195352	0.00141147	0.00153399	0.000963482	0.00119785	0.000859977	0.000994376	0.0013562
Eicosapentaenoic acid	0.276582	0.28946	0.680758	0.339352	0.0920349	0.302459	0.375667	0.49923	0.17401	0.354426	0.27898	0.356251
Enkephalin-leu, gly-pro-(lys-sar-sar-sar)(2)-ome-	0.0125057	0.00878752	0.0114403	0.0113164	0.0144246	0.0119369	0.0116366	0.0097992	0.00863843	0.00708414	0.00859689	0.00911889
ent-Epiafzelechin(2a->7,4a->8)epiafzelechin 3-(4-hydroxybenzoic acid)	0.00909717	0.00688403	0.00124911	0.0031538	0.00584016	0.00396844	0.00423478	0.000657532	0.000559826	0	0	0.00327225
Enterodiol sulfate	0.0286697	0.0523262	0.0380316	0.0514943	0.0682068	0.0338353	0.0388387	0.0383485	0.0710264	0.0585116	0.050141	0.0486001
Eplerenone	0.0273033	0.00383113	0.0180856	0.0276459	0.00800524	0.0246077	0.00905834	0.0330418	0.00521911	0.0127857	0.0373275	0.00884807
Ergoloid	0.00422176	0.00433171	0.00297678	0.00378858	0.00377857	0.004016	0.00320424	0.00308993	0.00208339	0.00171732	0.0034853	0.00403676
Ergonovine	0.00917379	0.00963978	0.0111312	0.0146662	0.0135805	0.0139124	0.0108525	0.00959815	0.00974677	0.0103194	0.0126358	0.00810613
Erinacine D	0.0417796	0.0491155	0.0785414	0.057842	0.0226124	0.0245721	0.0392965	0.0363842	0.0371606	0.060659	0.0463827	0.0379059
Erinapyrone C	0.0274012	0.0358583	0.0301365	0.030012	0.0349971	0.0361275	0.036975	0.0311934	0.0113092	0.0331625	0.0130919	0.0281744
Eriocitrin	0.0113688	0.0083269	0.00220803	0.0492865	0.00688244	0.00584465	0.00590144	0.00261853	0.00126317	0.000592554	0.000974856	0.00419163
Eriodictyol 7-(6-trans-p-coumaroylglucoside)	0	0.000245954	0.00177182	0.00167468	0.00155942	0	0.00183844	0.00363706	0.000164219	0.00131102	0.0021125	0.00230312
Erythrinasinate A	0.00153493	0.00370047	0.00309744	0.00132576	0.000957174	0.00119853	0.000765877	0.000547828	0.00330562	0.000787803	0.00026368	0.000535956
Erythrityl Tetranitrate	0.00389727	0.00360693	0.00353919	0.00289041	0.00257459	0.0021537	0.00274451	0.00224571	0.00279579	0.00228075	0.00216218	0.00327364
Erythromycin estolate	0.00703191	0.00650442	0.00520892	0.00582139	0.00442277	0.00406245	0.00514578	0.0068214	0.00437226	0.00405622	0.00383469	0.00441286
Erythronic acid	0.116687	0.0740058	0.0741664	0.0637801	0.0807799	0.0864053	0.0800067	0.0650762	0.0820308	0.0893686	0.0562416	0.0772973
Ethanaminium, 2-(hydroxyamino)-N,N,N-trimethyl-2-oxo-	0.0130142	0.0117425	0.0119335	0.0135003	0.0119522	0.0143581	0.0163414	0.0143142	0.0125083	0.0140795	0.00899548	0.0119018
Ethanethiol, 2-heptadecylamino-, hydrogen sulfate (ester)	0.00225969	0.00214493	0.00230607	0.00255144	0.00261271	0.00363202	0.00371295	0.00438477	0.00545187	0.00683443	0.00682471	0.00686577
Ethanimidamide, N,N''-1,12-dodecanediylbis-	0.00171517	0	0.00659996	0.00727975	0.0329596	0.0216931	0.0137659	0.0169583	0.00716506	0.00801545	0.0253063	0.0118794
Ethanol, 2-(didodecylamino)-	0.00155611	0.00241107	0.00268257	0.00287044	0.00152947	0.00212251	0.00228159	0.00278695	0.00341445	0.00524627	0.00401113	0.00250843
Ethanol, 2,2',2''-nitrilotris-, compd. with 2-butoxyethyl phosphate	0.0168043	0.020988	0.027123	0.0320927	0.0302722	0.0319494	0.0257274	0.0207509	0.0259794	0.021458	0.0248019	0.0173843
Ethyl 2,5-bis(methylsulfanyl)-1,3-thiazole-4-carboxylate	0.00714632	0.0064046	0.00654286	0.00575524	0.00299638	0.00723336	0.00106451	0.00787385	0.00991312	0.00669891	0.00687822	0.00680525
Ethyl 2-furanacrylate	0.0149732	0.0191664	0.0168552	0.0168592	0.0216895	0.0266461	0.0171213	0.0190091	0.01619	0.0233391	0.0219993	0.0126228
ethyl 6'-amino-5'-cyano-2,2'-dimethyl-1,3-dioxospiro[isoquinoline-4,4'-pyran]-3'-carboxylate	0.0253784	0.0360112	0.0232575	0.0272495	0.0393267	0.0265163	0.0279336	0.0245129	0.0531994	0.063043	0.0393501	0.043315
Ethyl 8-{3-[(1H-indol-2-yl)methyl]phenyl}-8-oxooctanoate	0.00971204	0.0104806	0.0119434	0.0128087	0.0130064	0.0119918	0.0120992	0.0169557	0.0169927	0.0172584	0.0193983	0.0191611
Ethyl aconitate	0.184642	0.351374	0.270713	0.324987	0.240624	0.198181	0.188165	0.207159	0.292973	0.235767	0.242261	0.258627
Ethyl Arachidonate	0.0084945	0.00795377	0.00695411	0.00280515	0.0069563	0.00746569	0.00704955	0.00843396	0.0060773	0.00861852	0.00518095	0.00752724
Ethyl glucuronide	0.00263202	0	0.000418007	0	0.0459347	0.0220119	0.0367556	0.0174818	0	0.00050675	0	0
Ethyl trans-p-methoxycinnamate	0.00348899	0.00357491	0.00202888	0.00260607	0.00467051	0.00493007	0.00326831	0.00336566	0.00336515	0.00287106	0.00284211	0.0040884
Ethylphosphate	0.00604962	0.00747215	0.00500339	0.00425011	0.00547713	0.00678119	0.00717109	0.00512817	0.00520145	0.0067436	0.00436706	0.00951993
Etoformin	6.18e-05	0.000242998	0.00034206	0	0	6.35e-05	0.000723235	0.000732514	0.00047586	0.000446627	0.000306227	0.000261425
Exopolysaccharide, pseudomonas	0.00939456	0.0201376	0.00264325	0.0025056	0.00520525	0.00510609	0.0214432	0.00354015	0.00259011	0.0037009	0.00326647	0.0112371
Fasciculic acid C	0.00111706	0.00533922	0.00109861	0.00522901	0.00677836	0.00574005	0.00591634	0.00729202	0.00656517	0.0110708	0.00844271	0.00960941
FD&C Green No. 1	0.00646085	0.00421305	0	0.00148223	0.00447277	0.00128163	0.0034287	0.00143479	0	0	0	0.00206944
Fenpropimorph	0	0.000426599	0.000530205	0.000936748	0.00299297	0.000906027	0.00145846	0.00263901	0.000110028	0.000332873	0.00231787	0.0020785
Ferulic acid	0.0152165	0.0165039	0.0152183	0.0180448	0.0144362	0.0160943	0.0170182	0.013145	0.0169403	0.0166171	0.0219059	0.0192291
Fexofenadine	1.75901	2.38795	2.71207	2.01357	0.916065	1.28412	1.31532	1.82587	2.36327	2.65185	1.89923	2.19414
Flavidulol C	0.00355293	0.00408216	0.00444443	0.00232696	0.00394064	0.00197371	0.00295651	0.00258864	0.00157445	0.00319129	0.00430684	0.003916
FMC-5(d18:1/24:1)	0.0422989	0.046012	0.040518	0.0719721	0.0219258	0.023981	0.0345518	0.0624543	0.0639927	0.0400647	0.0547836	0.0403196
Fomepizole	0.0017802	0.00190271	0.00226205	0.0021701	0.00218462	0.00229314	0.0018185	0.00231894	0.00247475	0.00235514	0.00140616	0.00236488
Formamide	0.00214379	0.00237576	0.00209784	0.00240584	0.00241898	0.00229819	0.00184743	0.00264972	0.00247601	0.00219826	0.00175279	0.00251707
Formic acid, magnesium salt	0.0126104	0.0128751	0.0123345	0.0124149	0.013586	0.0133766	0.00910926	0.0162622	0.0112815	0.010821	0.0108122	0.0126676
Fragransol C	0.542478	0.648799	0.481757	0.500254	0.464959	0.508604	0.410061	1.07352	0.473309	0.517979	0.480158	0.508043
Fucalpha1-2Galbeta1-3GalNAcbeta1-4Galbeta1-4Glcbeta-Cer(d18:1/26:1(17Z))	0.0114513	0.011763	0.0105052	0.00966601	0.01001	0.00992644	0.0114145	0.0108728	0.0111396	0.0114632	0.0104069	0.0108569
Fumaric acid	0.0415005	0.0828669	0.0432338	0.0452158	0.0734119	0.0557993	0.0478267	0.0496419	0.0403509	0.0301536	0.033785	0.0650565
Gadodiamide	0.000885574	0	0.00139726	0.00144594	0.0013182	0.0013276	0.00437829	0.00305349	0.000194224	0.000277612	0.00398823	0.00111334
Gadolinium	0.0505369	0.0468294	0.028424	0.0427454	0.0218761	0.0227638	0.026356	0.0273799	0.00805877	0.0155251	0.011005	0.0116426
Gadolinium--zinc (1/2)	0.0415521	0.0360977	0.0376491	0.0337257	0.0347966	0.0377803	0.0383494	0.0415302	0.0316734	0.0377344	0.0312657	0.0392663
Gadoteric acid	0.00142007	0.000338506	0.000759338	0.000725009	0.000563907	0.000908811	0.00228746	0.00104401	0.000103782	0.000182909	0.00216286	0.000492526
Gadoteridol	0.0160719	0.00506997	0.00821769	0.00698834	0.00619871	0.0121504	0.0228488	0.0104113	0.00361642	0.00214554	0.0219988	0.00421884
Galactonic acid	0.0744157	0.045482	0.0490509	0.0724663	0.106983	0.065499	0.08766	0.102821	0.0639199	0.095952	0.0578374	0.0677019
Galactosylceramide (d18:1/14:0)	0.0124978	0.0126867	0.0161627	0.0167019	0.0183401	0.0148179	0.0173885	0.0186349	0.0173361	0.0160091	0.0166731	0.0180997
Galalpha1-3(Fucalpha1-2)Galbeta1-4Glcbeta-Cer(d18:1/18:0)	0.00224804	0.00236583	0.00244076	0.00254176	0.00238628	0.00209187	0.00185673	0.00270437	0.00246453	0.00223485	0.00242334	0.00246687
Galalpha1-3Galalpha1-4Galbeta1-4Glcbeta-Cer(d18:1/26:0)	0.00471614	0.0018581	0.00215819	0.00306728	0.00337253	0.00332101	0.00373313	0.00501037	0.00270178	0.000699471	0.0040113	0.00337989
Galalpha1-4Galbeta1-4Glcbeta-Cer(d18:1/26:1(17Z))	0.00777054	0.0183133	0.00834386	0.0142318	0.0258037	0.00471217	0.00758192	0.0350418	0.0159191	0.028725	0.0151688	0.00252426
Galbeta1-3(GlcNAcbeta1-6)GalNAcbeta1-3Galalpha1-4Galbeta1-4Glcbeta-Cer(d18:1/22:0)	0.040081	0.0421756	0.0318829	0.0332785	0.0277945	0.0356675	0.0260739	0.0422028	0.0443782	0.024894	0.0325572	0.0552797
GalNAcalpha1-3(Fucalpha1-2)Galbeta1-3GalNAcalpha1-3(Fucalpha1-2)Galbeta1-4GlcNAcbeta1-3Galbeta1-4Glcbeta-Cer(d18:1/24:0)	0.0118673	0.0134268	0.0096975	0.00725379	0.0116763	0.0250177	0.0202002	0.00993615	0.0141095	0.00914792	0.00403487	0.00924913
GalNAcalpha1-3GalNAcbeta1-3(GalNAcbeta1-4)Galalpha1-4Galbeta1-4Glcbeta-Cer(d18:1/24:0)	0.00969421	0.0129203	0.0179866	0.0136984	0.0242608	0.0193253	0.0126972	0.0260473	0.0178954	0.0182098	0.0120739	0.0153587
GalNAcalpha1-3GalNAcbeta1-3Galalpha1-4Galbeta1-4Glcbeta-Cer(d18:1/24:0)	0.00893862	0.0112353	0.0168915	0.0140333	0.0013667	0.00657883	0.010756	0.00949668	0.0121981	0.020154	0.0112686	0.0130786
GalNAcalpha1-3GalNAcbeta1-3Galalpha1-4Galbeta1-4Glcbeta-Cer(d18:1/24:1(15Z))	0	0	0	0	0	0	0	0	0	0	0	0
GalNAcbeta1-4[Fuc alpha1-3]GlcNAcbata-Sp	0.0471503	0.0344454	0.0232895	0.0297217	0.0318615	0.0309012	0.0288451	0.0261498	0.0223422	0.0167876	0.0322489	0.0398322
Gambieric acid B	0.0126162	0.0145241	0.023999	0.0182154	0.0116129	0.0192607	0.0136227	0.0140158	0.0198316	0.0214527	0.0165038	0.026418
Gambieric acid D	0.0102903	0.00943808	0.00623043	0.00882006	0.00961242	0.00825681	0.00838206	0.00910812	0.0138606	0.00311921	0.0147198	0.0183793
gamma-Butyrolactone	0.0672932	0.0352513	0.0309789	0.0308203	0.0494992	0.0560502	0.0553789	0.0296984	0.0121688	0.0213751	0.0163451	0.033519
gamma-Glutamylisoleucine	0.011445	0.0103969	0.00485186	0.0101223	0.0187002	0.019674	0.0240079	0.0133229	0.0131715	0.0111281	0.00470837	0.0143948
gamma-Glutamylleucine	0.0289992	0.0282314	0.0159181	0.0257018	0.0487674	0.0563976	0.0685376	0.036743	0.0327092	0.0296902	0.0130641	0.0399377
gamma-Glutamylphenylalanine	0.0192806	0.0181023	0.0117696	0.0161408	0.0299749	0.0281413	0.0319485	0.0223575	0.0212488	0.0180891	0.0111984	0.0263789
gamma-Glutamylvaline	0.00567189	0.0048604	0.00291258	0.00442161	0.00872564	0.00824313	0.00866975	0.00645186	0.0051936	0.004901	0.00314309	0.00688552
Gamma-linolenyl carnitine	0.00518423	0.00413788	0.00448432	0.00459137	0.00311568	0.00395765	0.00335637	0.0085767	0.00411892	0.00477132	0.00514132	0.00482037
Ganglioside GA1 (d18:1/26:1(17Z))	0.00469336	0	0	0.00271083	0.00266612	0.00370616	0.00229761	0.0029338	0.00136758	0.00124697	0	0
Ganglioside GA1 (d18:1/9Z-18:1)	0.00504323	0.0065886	0.00322187	0.0049969	0.00316275	0.00555607	0.00708059	0.00238835	0.00509274	0.00337409	0.00218287	0.00483241
Ganglioside GA2 (d18:1/12:0)	0.0202777	0.0145609	0.00640803	0.0117084	0.0209177	0.0222398	0.0104428	0.0163246	0.00815447	0.00446219	0.0095501	0.0148275
Ganglioside GA2 (d18:1/16:0)	0.0174946	0.0434163	0.0143253	0.0179642	0.00977262	0.0148759	0.0133524	0.0259236	0.0364347	0.025323	0.0430368	0.0456435
Ganglioside GA2 (d18:1/18:0)	1.75749	2.29942	1.79405	1.93566	1.63276	1.46946	1.71641	2.15636	2.41203	1.43311	1.69433	2.22239
Ganglioside GA2 (d18:1/9Z-18:1)	0.271961	0.255181	0.210161	0.211994	0.232542	0.21872	0.208291	0.231641	0.166146	0.107789	0.158712	0.198409
Ganglioside GD2 (d18:0/23:0)	0.0129284	0.0157516	0.0163441	0.0154059	0.021951	0.0210288	0.0141994	0.0223334	0.0153754	0.0160749	0.0147802	0.0187392
Ganglioside GD2 (d18:1/9Z-18:1)	0.00558313	0.00531101	0.00375095	0.00358015	0.00435214	0.00690109	0.00746853	0.00314828	0.00568851	0.0041562	0.00171253	0.00433839
Ganglioside GD3 (d18:1/26:1(17Z))	0.0164193	0.0171206	0.0137577	0.0155927	0.0105506	0.0112861	0.0144849	0.0170608	0.0161853	0.0136789	0.0181546	0.0145562
Ganglioside GM1 (d18:0/24:0)	0.0206753	0.0189975	0.0156431	0.0171908	0.0114824	0.0135705	0.0123394	0.0215207	0.0188286	0.0121843	0.013924	0.0232718
Ganglioside GM1 (d18:0/24:1(15Z))	0.0162838	0.0152568	0.0120434	0.0122856	0.0106377	0.0120564	0.0122436	0.0153488	0.0161324	0.0108927	0.0131441	0.0159866
Ganglioside GM1 (d18:1/24:0)	0.00931254	0.00891204	0.00481982	0.00566651	0.00453209	0.00707951	0.00572532	0.00814234	0.0085144	0	0.00572225	0.00915963
Ganglioside GM1 (d18:1/24:1(15Z))	0.0162329	0.0160837	0.0140323	0.0141506	0.0113416	0.0138011	0.012494	0.0175146	0.0174362	0.011403	0.0144669	0.0169254
Ganglioside GM2 (d18:0/18:1(11Z))	0.00547411	0.00423822	0.00277873	0.00458502	0.0030703	0.00630133	0.00548426	0.00220682	0.00507157	0.00320752	0.00193172	0.00479432
Ganglioside GM2 (d18:0/23:0)	0.0173082	0.0246521	0.0271388	0.0239103	0.0397973	0.0351156	0.0197418	0.0399351	0.0291976	0.027659	0.019291	0.0294843
Ganglioside GM2 (d18:1/22:1(13Z))	0.00797771	0.0083939	0.00453323	0.0066632	0.00647051	0.00997195	0.0117894	0.00395688	0.00787459	0.00616688	0.00304466	0.00751641
Ganglioside GM2 (d18:1/9Z-18:1)	0.0162711	0.0159512	0.00781798	0.0104591	0.00703503	0.0193664	0.017903	0.00522855	0.0162788	0.00881148	0.00565444	0.0144732
Ganglioside GT1b (d18:1/20:0)	0.0145849	0.0178097	0.0190832	0.0155671	0.0422601	0.0342594	0.0107013	0.0382999	0.0224738	0.0169455	0.0122824	0.025644
Ganglioside GT3 (d18:0/25:0)	0.00721553	0.0065829	0.003563	0.00366835	0.00309877	0.00772721	0.00759162	0.00381958	0.00717178	0.00391198	0.00182158	0.00575202
Ganoderic acid F	0.0252362	0.0238849	0.025079	0.0274829	0.003901	0.0156195	0.0184429	0.015575	0.0163566	0.0180222	0.00892376	0.0119712
Ganoderiol C	0.00269204	0.00355794	0.00274182	0.00349613	0.00421022	0.00356595	0.00300926	0.00306686	0.00278537	0.00299069	0.00283557	0.00571535
Ganoderiol G	0.000230388	0.000242249	0.00124808	0.00147751	0.00463493	0.00241477	0.00223656	0.00190089	0.00153362	0.00225993	0.0023684	0.00237827
Ganodermic acid P2	0.0247795	0.0207508	0.0156641	0.0212629	0.0173671	0.0215444	0.0142311	0.0161951	0.0209146	0.0182572	0.0244886	0.023115
GAP 27	0.0156202	0.0117607	0.0142039	0.0130509	0.0147004	0.0153836	0.0131532	0.0100872	0.00901655	0.0109244	0.0112886	0.0116938
Gdp-hexanolaminyl-4-azidosalicylic acid	0	0	0.000132015	0	0	0	0.000475833	0.000234057	0	0	0.000400061	6.94e-05
Gein	0.00879009	0.0116002	0.00496483	0.00544388	0.00751125	0.0114315	0.0103085	0.0113498	0.00843128	0.0132722	0.00631489	0.00798534
Geranyl 3-methylbutanoate	0.00400969	0.0023868	0.00280234	0.00357095	0.00321064	0.00159735	0.00448077	0.00555361	0.00384824	0.00458958	0.00429145	0.000901121
Geranyl acetoacetate	0.00481252	0.00476439	0.00197816	0.00268841	0.00664975	0.00638103	0.00571937	0.00392931	0.00340405	0.00341232	0.0031234	0.00420519
Germane, acetoxytrimethyl-	0.0317601	0.0366051	0.0327877	0.0324943	0.0264288	0.0368978	0.0280319	0.0319921	0.0288325	0.0316871	0.028724	0.0338859
Germanicol cinnamate	0.00481063	0.00363677	0.00540843	0.00527555	0.00551721	0.00471367	0.00509654	0.00571891	0.00532338	0.00487917	0.00473227	0.00552961
Gingerol	0.029839	0.0295406	0.0309298	0.0309215	0.0280913	0.0276761	0.026863	0.0323159	0.0301545	0.0321597	0.0345111	0.0337481
Ginsenoside C	0.0109608	0.0111223	0.0101836	0.00766575	0.00638612	0.00641065	0.00539143	0.0046583	0.00387427	0.00389507	0.00320601	0.00381083
Ginsenoyne A linoleate	0	0.000575467	0.00176975	0.00192452	0.0020727	0.00134706	0.00160886	0.00171105	0.00153457	0.00144563	0.00189798	0.00168723
Glabrone	0.00913652	0.00172396	0.0022678	0.00112017	0.00272497	0.0170095	0.00208533	0.0146103	0.0065209	0.0152099	0.00778794	0.00556079
Glaucarubolone 15-O-beta-D-glucopyranoside	0.020555	0.015653	0.0214518	0.020076	0.0175119	0.023714	0.0224407	0.0291048	0.0209687	0.0268512	0.0248928	0.03186
Gln Gln Gln Glu Gln	0.000582358	0.00044177	0.000701013	0.00396313	0.00161697	0.00065566	0.00279891	0.00575786	0.000467697	0.000666449	0.00144973	0.00104898
Glucosylceramide (d18:1/12:0)	0.0118075	0.00989116	0.0129812	0.0128491	0.0129248	0.0118622	0.0123597	0.0134863	0.0138376	0.0124675	0.0115804	0.0125721
Glucosylceramide (d18:1/16:0)	0	0.000263866	0.00207479	0.00288023	0.00733542	0.00285521	0.0031041	0.00243335	0.00166612	0.00303045	0.00367632	0.00352406
Glucosylsphingosine	0.00683396	0.0063931	0.00502438	0.00495748	0.003269	0.00344422	0.00507195	0.0048412	0.00513794	0.00387143	0.00420899	0.00471432
Glutaconic acid	0.0378226	0.0389923	0.037823	0.0411241	0.0372399	0.0343323	0.0343836	0.037707	0.0418536	0.0424228	0.0302696	0.0399282
Glutamylmethionine	0.00171418	0.00256192	0.00304397	0.00290749	0.00325688	0.00251786	0.00423258	0.00320182	0.00436051	0.00485327	0.0024086	0.00267203
Glutethimide	0.00334729	0.00325107	0.00110146	0.00162741	0.00157564	0.0017468	0.00103611	0.00245906	0.00123724	0.00144202	0.00145593	0.00157844
Glyceric acid	0.00702695	0.00818175	0.00826777	0.00776306	0.0151012	0.0163878	0.0107643	0.00931182	0.0069182	0.00756841	0.00651317	0.00974515
Glycerol 2-(9Z,12Z-octadecadienoate) 1-hexadecanoate 3-O-[alpha-D-galactopyranosyl-(1->6)-beta-D-galactopyranoside]	0.000606969	0.00123022	0.0046662	0.00301316	0.00638671	0.00215839	0.00417516	0.007771	0.00242854	0.00276152	0.00494223	0.0067905
Glycerophosphocholine	0.013384	0.0141926	0.0126623	0.012456	0.0170381	0.014901	0.0126943	0.0130159	0.0181542	0.0153458	0.023111	0.013838
Glycinoeclepin B	0.012712	0.0101464	0.0107107	0.0103614	0.010708	0.00969186	0.00831631	0.0111691	0.00801023	0.006767	0.0064864	0.0108241
Glycocholic acid	0.00622832	0.00408693	0.0109261	0.00846481	0.00485299	0.00388822	0.00403531	0.0103783	0.00879234	0.00768349	0.00699293	0.00603372
Glycolic acid	0.0230123	0.0124674	0.0218848	0.0159746	0.0120293	0.0164609	0.012233	0.0110941	0.0103875	0.0133857	0.0130351	0.016972
Glycylglycylglycyl-L-prolylglycyl-L-lysyl-N~5~-(diaminomethylidene)-L-ornithine	0.00587044	0.00959412	0.0261941	0.0208715	0.0137066	0.00957978	0.013003	0.0284215	0.0206572	0.00971876	0.0119501	0.0205469
Glycylglycyl-N~5~-(diaminomethylidene)-L-ornithylglycylglycylglycylglycyl-L-serylglycylglycylglycine	0.0237945	0.0265843	0.0154364	0.0233997	0.0221755	0.0206799	0.0232673	0.0187794	0.0198693	0.0160058	0.0180388	0.0311881
Glycyl-L-alanylglycyl-L-alanylglycyl-N~5~-(diaminomethylidene)-L-ornithylglycyl-L-histidine	0.124923	0.119141	0.108043	0.118965	0.130992	0.148713	0.113873	0.109962	0.120122	0.142074	0.108977	0.137023
Glycyl-L-glutaminyl-L-isoleucyl-L-histidylglycyl-L-leucyl-L-seryl-L-proline	0.0139379	0.0100735	0.0141708	0.0107497	0.0111729	0.0123079	0.0119158	0.012732	0.0127651	0.0143274	0.014229	0.0155446
Glycyl-L-leucyl-L-valyl-L-leucylglycyl-L-prolyl-L-isoleucyl-L-histidyl-L-lysine	0.000164255	0	0.00199765	0.00130409	0.00269388	0.000619478	0.00171207	0.00623445	0.000714486	0.000667062	0.00175619	0.00414965
Glycyl-L-lysylglycylglycyl-L-alanyl-L-lysyl-N~5~-(diaminomethylidene)-L-ornithyl-L-histidyl-N~5~-(diaminomethylidene)-L-ornithine	0.0139614	0.0203994	0.0175306	0.0188015	0.00714385	0.0127288	0.0180494	0.0156694	0.011097	0.00845599	0.00635495	0.0111761
Glycyl-L-lysyl-L-prolyl-L-lysyl-L-lysyl-L-isoleucyl-N~5~-(diaminomethylidene)-L-ornithyl-L-tyrosyl-L-serine	0.00399359	0.00492876	0.00424622	0.0040425	0.00489378	0.00512045	0.00476204	0.0059744	0.00565377	0.0063157	0.00355056	0.00559994
Glycyl-L-methionyl-L-threonyl-L-valyl-L-leucyl-L-glutaminyl-N~5~-(diaminomethylidene)-L-ornithine	0.0092998	0.00747759	0.00808226	0.003952	0.00392671	0.0102296	0.00988689	0.0107299	0.0118377	0.0101605	0.0123248	0.0108371
Glycyl-L-phenylalanyl-L-phenylalanyl-L-prolylglycine	0.000818955	0.00176501	0.00799668	0.00845966	0.00796463	0.00569286	0.00148375	0.0113864	0.00977346	0.00109773	0.00195762	0.00469175
Glycyl-L-tyrosyl-L-threonyl-L-leucyl-L-seryl-L-seryl-L-tyrosyl-L-tryptophan	0.00297541	0.00310824	0.00371591	0.00346964	0.00459388	0.00375642	0.00282454	0.00484523	0.00442181	0.00335806	0.00275846	0.00329501
Gonadotropin releasing hormone	0.0134436	0.0129432	0.00660864	0.00771815	0.00586001	0.0149484	0.0138949	0.00494062	0.012636	0.00730678	0.00465981	0.0108829
Goshonoside F6	0.0985442	0.090206	0.060008	0.0824693	0.0618931	0.0713048	0.045102	0.0558984	0.0624932	0.0463821	0.0633256	0.0658609
Goyaglycoside c	0.00210325	0.00406519	0.0133625	0.0054782	0.00047894	0.00488196	0.00653673	0.0105593	0.00153007	0.00556474	0.00430337	0.00593235
Goyaglycoside h	0.0440808	0.0341972	0.03451	0.0281847	0.0199444	0.0183748	0.0196363	0.011072	0.00957575	0.00835939	0.0111508	0.0108887
Granisetron	0.0101924	0.00864349	0.0117027	0.0174454	0.00779952	0.0148956	0.0120493	0.0169728	0.00552387	0.00587454	0.00587382	0.0147544
Guanidine, 2-cyano-1-cyclooctyl-3-(4-pyridyl)-	0.00962074	0.0250447	0.00539585	0.00518476	0.0145741	0.0232419	0.00649962	0.0136864	0.00991307	0.00728186	0.00801292	0.0229604
Guanine	0.0172459	0.0166783	0.0166734	0.016153	0.0165063	0.0148539	0.0156611	0.0148786	0.0142815	0.0134847	0.0136858	0.0130552
Guanosine	0.000839937	0.000440507	0.003873	0.00647992	0.00322478	0.0120256	0.002587	0.00575918	0.0050021	0	0.00254713	0.00115475
Guggulsterone	0.0136549	0.014764	0.0423163	0.020351	0.00610732	0.0189423	0.0235317	0.0338084	0.0109628	0.020532	0.0168553	0.0205791
Gymnodimine	0.611577	0.600209	0.515303	0.552273	0.58395	0.56958	0.525873	0.599833	0.544224	0.431392	0.547097	0.627419
Heptadecanoic acid	0.00162184	0.00111054	0.00294978	0.00232839	0.00257452	0.00179463	0.0020013	0.00376375	0.00183354	0.00265214	0.00296445	0.00267878
Heptaethylene glycol	0.0011689	0.00172989	0.00314316	0.00153295	0.00145542	0.00244388	0.00190237	0.00266476	0.00191683	0.00131625	0.00354484	0.00224089
Hexa(tetradecane-1-sulfonyl)benzene	0	0.00401259	0.00141289	0.00698603	0.00480802	0.00372389	0.00478942	0.00741611	0.00791801	0.00554202	0.00483918	0.00429234
Hexadecyl morpholinium hydrogen phosphate	0.0118477	0.0501804	0.00299076	0.00187341	0.0323019	0.0137305	0.00417315	0.0301709	0.0149586	0	0.0152783	0.0636785
Hexaethylene glycol	0.00209304	0.00352172	0.00564667	0.00316492	0.00378523	0.00761869	0.00490036	0.00542798	0.00405927	0.0034148	0.0102848	0.00522301
Hexanedioic acid, polymer with N-(2-aminoethyl)-1,3-propanediamine and N,N''-1,2-ethanediylbis(1,3-propanediamine)	0.00986468	0.0135014	0.0198474	0.0200993	0.0201927	0.0158878	0.0187144	0.0208464	0.0200475	0.0199445	0.018643	0.0208513
Hexanethioic acid S-propyl ester	0.0242864	0.0208685	0.0158159	0.0128823	0.0231877	0.0386785	0.0123804	0.0329082	0.0151884	0.0194893	0.0131752	0.0230089
Hexanoylcarnitine	0.00523057	0.00534059	0.00532578	0.00402629	0.00507147	0.00789396	0.00714011	0.0150235	0.00632841	0.00531125	0.00660575	0.00943225
Hexanoylglycine	0.270936	0.23088	0.184012	0.137411	0.266128	0.435129	0.155662	0.418406	0.176885	0.23017	0.183433	0.231088
Hexasulfide, dimethyl	0.0133489	0.0138285	0.015999	0.0134839	0.0135824	0.012416	0.0143021	0.016725	0.0262574	0.0247796	0.022768	0.0226909
Hexylamine	0.076286	0.16429	0.0720635	0.191168	0.192561	0.167325	0.167349	0.14079	0.160521	0.155529	0.148717	0.151102
Hippuric acid	0.00553835	0.00431711	0.00554313	0.00259859	0.00163974	0.00103246	0.00925835	0.00360566	0.00129892	0.00239232	0.00193129	0.00257856
His Ile Arg Arg	0.0410436	0.0440102	0.040131	0.0438391	0.0441625	0.0444441	0.0481588	0.0438041	0.0585766	0.0416106	0.0414899	0.0427642
His Lys Gln Trp	0.0863697	0.0883252	0.0665801	0.0746587	0.0302504	0.052989	0.0463857	0.0358918	0.0572045	0.0139496	0.0242584	0.029735
His Lys Lys Arg	11.9653	11.7952	10.5823	10.9423	11.6443	11.4881	10.5903	12.4299	10.8716	9.00389	11.0725	12.9724
His Pro Arg Arg	0.277232	0.257879	0.186963	0.291694	0.136766	0.153449	0.210978	0.198862	0.14844	0.115105	0.161211	0.163569
His Trp Trp Tyr	0.010927	0.008859	0.0101838	0.00895147	0.00482236	0.00799187	0.00670524	0.0285603	0.00380301	0.000662129	0.000614807	0.0021413
Homocysteinesulfinic acid	0.0172981	0.0165987	0.0136677	0.0219469	0.0298455	0.0262907	0.0250909	0.0288153	0.0210954	0.0316204	0.0176396	0.0179919
Homovanillic acid sulfate	0.00539137	0.00175286	0.0016461	0.00124486	0.00275677	0.00894603	0.0019078	0.00777942	0.00421914	0.00748194	0.00464258	0.00442148
Hovenidulcigenin A	0.059214	0.0614693	0.0548434	0.0525077	0.0570026	0.0616036	0.0542749	0.0695816	0.0609382	0.0447145	0.0428202	0.0698485
Hovenidulcigenin B	0.390343	0.390552	0.32074	0.336194	0.272504	0.325628	0.275865	0.336847	0.415273	0.335867	0.385145	0.432129
Humulinic acid A	0.0262676	0.0194382	0.0215935	0.0300529	0.04414	0.0601214	0.0303521	0.0156312	0.0241062	0.0560307	0.0193453	0.0187883
Hydralazine pyruvate hydrazone	0.0626212	0.0400021	0.0361993	0.0260614	0.0431632	0.123962	0.0309474	0.100914	0.079421	0.141689	0.0769726	0.0618987
Hydratopyrrhoxanthinol	0.207292	0.197772	0.139999	0.214588	0.127623	0.155517	0.149766	0.144765	0.161681	0.150552	0.236375	0.191029
Hydroxydestruxin B	0	6.99e-05	0.00182466	0.00219743	0.00216044	0.00141465	0.000545718	0.00259402	0.00202725	0.000384431	0.0007094	0.00208032
Hydroxyhomodestruxin B	0.0246859	0.0233618	0.00978732	0.00712268	0.0143988	0.0101805	0.0111094	0.0086281	0.01264	0.00678053	0.00698324	0.0114911
Hydroxyphenylacetylglycine	0.00284104	0.0111091	0.01192	0.0103776	0.0081541	0.0109019	0.013086	0.00596798	0.00486708	0.00494301	0.00653794	0.00448915
Hydroxyphenyllactic acid	0.0804116	0.0974449	0.081016	0.0888747	0.0707593	0.063302	0.0638976	0.0682758	0.0640884	0.0550799	0.0531204	0.0614327
Hypericin	0.000423853	0.000365484	0.000370349	0.000232676	0.000307693	0.000547855	0.000861779	0.000550075	0.000510426	0.000192873	0.000465096	0.000349088
Hypogeic acid	0.00145534	0.00136897	0.00252178	0.00205453	0.00271668	0.00435608	0.00223126	0.00399051	0.00201037	0.00249254	0.00381913	0.0041306
Hyponitrous acid, sodium salt	0.00393396	0.00400554	0.00382935	0.00335921	0.00397206	0.00373426	0.00274574	0.00493308	0.00300494	0.00366495	0.00295668	0.00398395
Hypophosphoric acid, tetrapotassium salt	0.0129618	0.011049	0.0119926	0.00931763	0.0100345	0.011262	0.0102572	0.0108238	0.0118602	0.0113506	0.012039	0.0111813
Icatibant	0.00583711	0.00508313	0.00298266	0.00521432	0.00302955	0.00581928	0.00675224	0.00269318	0.00545577	0.00357557	0.00242798	0.00502729
Icosyl hydrogen sulphate, compound with 2,2'-iminodiethanol (1:1)	0.00340786	0.00710859	0.00665112	0.00547872	0.00270987	0.00428495	0.00394609	0.00537283	0.00434565	0.00728704	0.0058777	0.00691043
IDP	0.015224	0.0266374	0.021993	0.015957	0.0471097	0.0506882	0.0258833	0.0234902	0.0234239	0.0225535	0.0211753	0.0348977
Ile Lys Trp Trp	0.00107682	0.000839784	0.000816599	0.00392503	0.00182276	0.000879338	0.00364039	0.00496979	0.000800969	0.00083397	0.00168716	0.0010518
Imiquimod	0.0199408	0.0180141	0.0205849	0.0186386	0.0182762	0.014572	0.016758	0.018804	0.0163151	0.0162004	0.0523728	0.0129985
Indole	0.0237444	0.0257335	0.0165327	0.0193776	0.0286126	0.0287098	0.0241917	0.0179564	0.0242816	0.0198256	0.0195531	0.0248953
Indole-3-propionic acid	0.0052267	0.00432226	0.00281377	0.0047191	0.00210406	0.00361784	0.00490249	0.00181775	0.00257567	0.00301494	0.0042737	0.00286028
Indoleacrylic acid	0.195954	0.192683	0.133647	0.137567	0.239423	0.243938	0.183789	0.163968	0.186185	0.158157	0.157622	0.207615
Indolelactic acid	0.00556036	0.00389226	0.00509943	0.00413496	0.00467983	0.007588	0.00422243	0.00491633	0.00365369	0.0068232	0.00618965	0.00340706
Indolepyruvate	0.027865	0.0202749	0.0197255	0.0201484	0.0276711	0.0321969	0.0201184	0.0152875	0.015452	0.0220814	0.0167626	0.0163621
Indoxyl	0.0724391	0.0760603	0.0714978	0.0747451	0.0753468	0.0740862	0.0749995	0.0772672	0.0738922	0.0753218	0.0732358	0.0758572
Indoxyl sulfate	0.58896	0.301562	0.1442	0.275445	0.210756	0.336035	0.695719	0.322512	0.215833	0.258856	0.176693	0.484447
Inosine	0.00252155	6.76e-05	0.00306572	0.00729998	0.00491784	0.00849162	0.00234291	0.00642878	0.00484976	0.000684327	0.00151289	0.00227464
Inositol 1,3,4,5,6-pentakisphosphate	0.0332478	0.0316092	0.036292	0.0339564	0.0333834	0.0342192	0.0325258	0.0352061	0.0326012	0.032534	0.0330045	0.0402484
Iprobenfos	0.0374022	0.044572	0.0392467	0.0259318	0.026438	0.0444737	0.0903524	0.0490959	0.0220905	0.0232138	0.0133227	0.0494495
Isepamicin	0.0843628	0.0754684	0.0788769	0.090814	0.025222	0.0544598	0.0531576	0.0491295	0.0591198	0.0642576	0.0392145	0.0415969
Isoamyl isothiocyanate	0.00848436	0.0100992	0.0102874	0.00855959	0.00589907	0.00628476	0.00882218	0.00732533	0.00942458	0.0135713	0.00791613	0.00846035
Isobutene	0.00151557	0.00196979	0.00125809	0.00201261	0.00161042	0.00202792	0.0017274	0.0016744	0.00187026	0.00190248	0.00169637	0.00153094
Isobutyrylglycine	0.0589911	0.0861295	0.0556045	0.03702	0.0737743	0.100035	0.0659996	0.16616	0.0428631	0.0372001	0.0549619	0.0845576
Isobutyryl-L-carnitine	0.0161365	0.020724	0.023704	0.0172295	0.0317422	0.0296494	0.0470176	0.0497989	0.0180752	0.0169336	0.0282587	0.0340243
Isocarboxazid	0.0108773	0.00927367	0.0175341	0.0103482	0.00405787	0.0098096	0.0139313	0.0130186	0.00593368	0.0108448	0.0079195	0.012148
Isoelemicin	0.00939548	0.00969326	0.0187411	0.0113314	0.00327112	0.00950518	0.0123414	0.0131396	0.00491142	0.0123455	0.00558283	0.0085825
Isofucosterol 3-O-[6-O-(9-Octadecenoyl)-b-D-glucopyranoside]	0.00079432	0.000769828	0.0015719	0.0022835	0.00527506	0.00324756	0.00275702	0.00180411	0.00221063	0.00269065	0.00314221	0.00257479
Isoleucylproline	0.0127823	0.0107133	0.00805624	0.0051532	0.00892761	0.00803588	0.00704801	0.0100313	0.00617309	0.0113407	0.00850165	0.0131818
Isoliensinine	0.00290451	0.00327436	0.00378125	0.00437355	0.00383797	0.00383853	0.00374947	0.003716	0.00445987	0.00398311	0.00414518	0.00441705
Isomammein	0.00397304	0.0113297	0.0192722	0.0144923	0.0163812	0.015773	0.025424	0.0275486	0.0168278	0.0199728	0.018794	0.0239907
Isonuatigenin 3-[rhamnosyl-(1->2)-glucoside]	0	0	0.000653954	0.000367736	0.000416468	0	0.00093105	0.00112612	0	6.11e-05	0.000496868	0.000691325
Isoplumbagin	0.374894	0.528814	0.376967	0.444578	0.327808	0.263614	0.27787	0.257351	0.262253	0.295787	0.213915	0.385796
Isopropyl apiosylglucoside	0.178918	0.30544	0.145625	0.131639	0.185571	0.340163	0.203058	0.385471	0.143153	0.167824	0.294285	0.266265
Isorheagenine	0.0158587	0.021863	0.01339	0.0166915	0.0218625	0.0158017	0.0152747	0.0159274	0.0312959	0.0349401	0.023195	0.0226121
Isosakuranin	0.0794542	0.0172461	0.0183967	0.056581	0.0227023	0.040921	0.0321571	0.0667411	0.0157938	0.0153694	0.0491555	0.0201634
Isosyringinoside	0.00195393	0.000604522	0.000956146	0.000598216	0.000562588	0.00179708	0.00276512	0.000633175	0.000221805	0.000277796	0.0024552	0.000326563
Isotetrandrine	0.0690467	0.064982	0.0749832	0.0594261	0.0337798	0.0552723	0.0404295	0.0465046	0.0539835	0.0202549	0.0229508	0.0357309
Isothipendyl	0.00162253	0.00312077	0.00173306	0.00663018	0.00121848	0.00152995	0.00234369	0.00274802	0.00236283	0.000920491	0.00165132	0.00213231
Isovitexin 2''-O-glucoside	0.00110024	0.00217795	0	0	0.000348473	0.00207941	0.00189947	0	0.000201046	0	0	0
Janthitrem B	0.0495848	0.105008	0.0452311	0.0896859	0.0951155	0.0872834	0.0460855	0.0471614	0.0514951	0.0331255	0.0483731	0.0581411
Jmv 167	0.00522875	0.00448423	0.00841959	0.00306648	0.00764983	0.00425826	0.00682134	0.0147985	0.00758167	0.00979557	0.00168169	0.00291869
Jubanine B	0.0181958	0.0162367	0.00422152	0.0166927	0.0174122	0.0133721	0.0162855	0.0124145	0.0191865	0.00968124	0.0117743	0.0156336
Jurubine	0.126969	0.130798	0.0969302	0.102247	0.0858899	0.129086	0.0940319	0.133009	0.0766909	0.0759087	0.0711562	0.0717465
Kaempferol 3-(2'''-caffeoylsophoroside) 7-cellobioside	0.00678104	0.00766458	0.00306263	0.00462044	0.00348154	0.00780126	0.00706155	0.00263563	0.00680111	0.00381102	0.00209885	0.00615549
Kaempferol 3-O-feruloyl-sophoroside 7-O-glucoside	0.00313685	0.00493056	0.00420804	0.0033468	0.00746841	0.00516205	0.00388534	0.00627543	0.00540577	0.00402051	0.00405263	0.0046669
KDNalpha2-3Galbeta1-3GalNAcbeta1-4Galbeta1-4Glcbeta-Cer(d18:1/24:0)	0.0106121	0.0143162	0.0198459	0.0173089	0.00724835	0.0128582	0.0137778	0.012541	0.021614	0.0226532	0.017543	0.0268225
KDNalpha2-3Galbeta1-4Glcbeta-Cer(d18:1/16:0)	0.0284429	0.0270085	0.021116	0.0196273	0.0156651	0.020192	0.0167681	0.0273098	0.0281883	0.0145971	0.0175349	0.033121
KDNalpha2-3Galbeta1-4Glcbeta-Cer(d18:1/18:0)	0.00726938	0.00677297	0.0066654	0.00481664	0.0146599	0.00861324	0.00410676	0.0186622	0.0101688	0.00651782	0.0036361	0.0073436
KDNalpha2-3Galbeta1-4Glcbeta-Cer(d18:1/24:0)	0.00944698	0.0090345	0.00909515	0.00818778	0.00970509	0.00931007	0.00869439	0.00835033	0.0100533	0.00856881	0.00915204	0.00911432
KOdiA-PC	0.219717	0.258619	0.110234	0.0852355	0.162174	0.132977	0.188117	0.152903	0.101574	0.0615362	0.0769691	0.128279
Kuwanol E	0.0172855	0.0141834	0.0196088	0.0247653	0.0134032	0.0172532	0.0164937	0.014096	0.0140648	0.0226891	0.0280115	0.0184879
Kuwanon A	0.0305497	0.0783765	0.05944	0.063797	0.0242092	0.0367214	0.0402633	0.157274	0.0383356	0.0459711	0.0566367	0.0528614
L-2-Amino-5-hydroxypentanoic acid	0.00951762	0.0161395	0.00805154	0.0133571	0.0203375	0.0137974	0.0173825	0.0185533	0.0213672	0.0178026	0.0128316	0.0196067
L-Acetylcarnitine	0.427613	0.329624	0.378345	0.27296	0.417225	0.400363	0.360432	0.51005	0.343257	0.399215	0.322831	0.41269
Lacto-N-tetraose	0.0204934	0.017619	0.0105715	0.0150277	0.0178621	0.015293	0.0150405	0.0140663	0.0121746	0.00889036	0.016914	0.0196206
L-Alanine, L-lysyl-L-isoleucyl-L-valyl-L-phenylalanyl-L-phenylalanyl-	0	0.00250082	0.00189691	0.00125938	0.00144865	0.00118242	0.00280954	0.00256931	0.00114972	0.00195223	0.00208575	0.00220148
L-Alanine, L-tyrosyl-L-valyl-L-lysyl-L-alanyl-	0.0136941	0.0348933	0.018814	0.019737	0.0137993	0.00967833	0.0125172	0.0094441	0.020141	0.02622	0.0178485	0.00557016
L-Alanyl-L-alanyl-L-cysteinyl-L-histidylglycylglycylglycine	0.0173054	0.00451978	0.0205178	0.0165531	0.00723446	0.0203	0.0206241	0.0154685	0.00674846	0.0137497	0.0165527	0.0315087
L-Alanyl-L-alanyl-L-methionyl-L-alanyl-L-alanyl-L-prolyl-L-phenylalanine	0.123797	0.121259	0.157594	0.158667	0.212469	0.218632	0.211468	0.126839	0.141889	0.131422	0.14193	0.177643
L-Alanyl-L-asparaginyl-L-phenylalanyl-L-alanyl-L-valyl-L-histidine	0.173186	0.171539	0.145186	0.140461	0.157028	0.164823	0.136858	0.150101	0.12064	0.0892667	0.0885083	0.159718
L-Alanyl-L-leucyl-L-tyrosyl-L-leucyl-L-seryl-L-leucylglycyl-L-valyl-L-leucine	0.00560624	0.00558509	0.0111586	0.0109949	0.00772658	0.00728287	0.0108153	0.010276	0.00793372	0.00784547	0.00836526	0.00728819
L-Alanyl-L-lysyl-L-threonyl-L-lysyl-L-glutaminyl-L-leucyl-N~5~-(diaminomethylidene)-L-ornithine	0.0151681	0.00146928	0.0136649	0.0157188	0.0105228	0.0257172	0.00733694	0.0111271	0.0277582	0.0240546	0.0161867	0.00838424
L-Alanyl-L-prolyl-N~5~-(diaminomethylidene)-L-ornithyl-L-glutaminyl-L-lysyl-N~5~-(diaminomethylidene)-L-ornithine	0.0078646	0.00706666	0.00590038	0.00476907	0.00371141	0.00396004	0.0038248	0.0015317	0.00154795	0.0011325	0.00189738	0.00126793
L-Alanyl-L-threonyl-L-leucyl-L-glutaminyl-L-valyl-L-valyl-L-threonine	0.000473439	0.00228566	0.000617606	0.00279647	0.00387858	0.00346985	0.00344023	0.003852	0.00361668	0.00832577	0.00576127	0.00670301
Landomycin B	0	0.000260653	0.000923745	0.000540975	0.000685638	0.000748946	0.00133103	0.00178848	0.000981518	0.00111602	0.0010967	0.00142591
Lanthionine ketimine	0.0702637	0.0192952	0.0153528	0.0270599	0.0192235	0.0585301	0.0556614	0.0186607	0.0111493	0.018523	0.0179342	0.0239518
L-Arginine	0.0156319	0.0221017	0.0203615	0.0159331	0.0164645	0.0141496	0.0228709	0.0177279	0.0242082	0.0218535	0.0267901	0.0211679
L-Arginine, L-prolyl-L-arginyl-L-threonyl-L-prolylglycylglycyl-	0.0151373	0.0428754	0.0143228	0.0129945	0.0118662	0.0183174	0.039102	0.0259734	0.0162185	0.0250827	0.0129271	0.0183677
Latanoprost	0.00119525	0.0020726	0.00292141	0.00177299	0.00167889	0.00202233	0.00188763	0.00228932	0.00248491	0.00171824	0.00292728	0.00254297
Laurixamine	0.00312233	0.00284272	0.00391324	0.0030913	0.00386676	0.00323152	0.00404092	0.00444273	0.00486687	0.00480035	0.0046792	0.00452732
Lauryl hydroxysultaine	0.0206916	0.0160465	0.0202025	0.0133343	0.0144189	0.0236457	0.0145471	0.0246243	0.0196464	0.0262823	0.021721	0.0200223
L-Carnitine	0.204866	0.270824	0.225033	0.304832	0.471256	0.315362	0.354555	0.251842	0.334552	0.304288	0.352047	0.280169
L-Cysteinyl-L-isoleucyl-L-glutaminyl-L-isoleucyl-L-histidyl-L-alanine	0.0468662	0.0442098	0.028294	0.0366301	0.0340795	0.0271758	0.0179309	0.0210429	0.0209868	0.0143317	0.0191136	0.024133
L-Cysteinyl-L-lysyl-L-alanyl-L-valyl-L-valyl-L-cysteine	0.00187143	0.00167317	0.0022155	0.00244891	0.0017131	0.00269843	0.00260067	0.004772	0.00650812	0.00329076	0.0044724	0.00706789
L-Cystine	0.0080788	0.010704	0.0094052	0.00938343	0.0119034	0.00849618	0.00948965	0.00920049	0.0129811	0.011862	0.0117203	0.010978
Lepidine B	0.0146008	0.00122238	0.00119994	0.0137115	0.00149531	0.00999143	0.00036731	0.0184924	0.00050426	0.00428149	0.0226409	0.00123504
Lepimectin	0.043214	0.0685266	0.0161332	0.0286687	0.0281313	0.0131222	0.0325126	0.024514	0.0299168	0.0110437	0.0111488	0.0277048
Leu His Phe Asn Pro	0.0269248	0.021666	0.022428	0.028212	0.0341055	0.0288963	0.0301352	0.0245357	0.0248047	0.0209504	0.0280304	0.0291423
Leu Thr Ser Lys Tyr	0.192946	0.197145	0.185478	0.198343	0.468746	0.484456	0.480963	0.193189	0.201215	0.151363	0.161714	0.195697
Leucodelphinidin 4-O-[2,4-bisgalloyl-6-(3-galloylgalloyl)-beta-D-glucopyranoside]	0.00336345	0.0028554	0.00312191	0.00390618	0.00420261	0.00393168	0.00227468	0.00407867	0.00308709	0.00414492	0.00214661	0.00364448
Leucomycin A6	0.0427301	0.0327033	0.0395914	0.0300062	0.0339949	0.0364133	0.0343438	0.0340812	0.0341152	0.0342969	0.0361926	0.0366157
Leukotriene A4	0.0029936	0.00220944	0.0125431	0.00311471	0.00177185	0.00332861	0.00339758	0.00433382	0.00216766	0.00341262	0.00331217	0.00251586
Leukotriene B4	0.0587898	0.0614071	0.1132	0.0732908	0.0218828	0.0622797	0.058232	0.07868	0.0344055	0.0608735	0.0391565	0.060761
Leukotriene B4 ethanolamide	0.000266677	0.000615083	0.000521371	0.000686298	0.000866313	0.000884322	0.00070382	0.000611559	0.000379604	0.000544539	0.000209553	0.00059527
Leukotriene C4	0.00294733	0.0029759	0.00404027	0.00326239	0.00345768	0.00269911	0.00306086	0.00399388	0.00436568	0.00364786	0.00385796	0.00419802
Leukotriene C5	0.002331	0.00180952	0.00342342	0.00299612	0.00258609	0.00251144	0.00284387	0.00372366	0.00293924	0.0028071	0.00292759	0.00349577
L-Glutamic acid	0.0231009	0.0263503	0.0189026	0.018412	0.0201859	0.019909	0.0195643	0.0174426	0.0197311	0.0231118	0.0158506	0.0248051
L-Glutamic acid, compound with 5-((3,4,5-trimethoxyphenyl)methyl)pyrimidine-2,4-diamine (1:1)	0.00766046	0.00116231	0.00490685	0.00679639	0.00169794	0.00473329	0.00244296	0.00753618	0.00140165	0.00344814	0.00994882	0.00226457
L-Glutamine	0.0757247	0.120359	0.0853741	0.0831829	0.096004	0.110783	0.128324	0.126075	0.140218	0.129785	0.10448	0.144169
L-Histidine	0.0236812	0.025569	0.0186125	0.0243529	0.0225721	0.0195572	0.0249855	0.0276867	0.0278106	0.0323564	0.020174	0.022423
L-Histidine, L-seryl-L-prolyl-L-lysyl-L-lysyl-	0.0199895	0.0304879	0.0296901	0.0276221	0.0210176	0.0207096	0.0226432	0.023361	0.0252598	0.0319028	0.0246452	0.0357814
L-Histidylglycyl-L-tryptophyl-L-alanyl-L-tyrosylglycine	0.0443377	0.0361774	0.0424534	0.0340295	0.0187821	0.0296186	0.0271143	0.0844783	0.0223383	0.0114613	0.0130395	0.0181342
L-Histidyl-L-leucyl-L-alanyl-L-prolyl-L-seryl-L-alanyl-L-valine	0.0169396	0.0200429	0.0425762	0.019779	0.00516341	0.0149383	0.017782	0.022525	0.0097455	0.0350107	0.0198214	0.00674944
L-Histidyl-L-tryptophyl-N~5~-(diaminomethylidene)-L-ornithyl-L-lysyl-N~5~-(diaminomethylidene)-L-ornithine	0.00612809	0.00493914	0.00536367	0.00398375	0.00420787	0.00483867	0.00441491	0.00442249	0.00519266	0.00442934	0.00472997	0.00429539
Licorisoflavan A	0.00511154	0	0.000166019	0.0044851	0.000358921	0.0032242	0	0.00523609	0	0.00192986	0.00588267	0.000703343
Ligustroside	0.0383323	0.0279249	0.0371039	0.0359265	0.0197464	0.0402579	0.0417812	0.0343182	0.0225497	0.0380295	0.0343714	0.0692124
Linalyl anthranilate	0.00476161	0.00463032	0.00298284	0.00235937	0.00938689	0.00999971	0.00645785	0.00716782	0.00413869	0.00527551	0.00574842	0.0103588
Linoelaidyl carnitine	0.0548936	0.0433269	0.0520795	0.0505959	0.035698	0.0465003	0.051892	0.101672	0.0608695	0.0716717	0.0534668	0.0553545
Linoleamide	0.00152364	0.00174362	0.0051192	0.00491612	0.0212955	0.018429	0.013635	0.00917203	0.00491441	0.0105961	0.0219043	0.00998466
Linoleic acid	0.00452461	0.00455841	0.00682353	0.0053427	0.00591508	0.00546403	0.00617105	0.00740687	0.00472588	0.00735072	0.00536571	0.00742897
Lisinopril	0.0365513	0.0387537	0.0575436	0.0347755	0.0106848	0.0353648	0.0436645	0.0454601	0.0229009	0.0267921	0.0229652	0.0315349
L-Isoleucine	2.59109	2.53192	2.26758	2.65936	2.57268	3.06701	3.34044	2.83217	2.8318	2.57765	1.68476	2.47033
L-Isoleucine, L-prolylglycyl-L-threonyl-L-isoleucyl-L-asparaginyl-	2.69892	2.78062	2.38962	2.59808	2.17261	2.72037	2.25467	2.21228	2.88317	2.27476	2.66311	3.10923
L-Isoleucyl-L-prolyl-L-isoleucyl-L-tyrosyl-L-glutamic acid	0.468454	0.486021	0.485744	0.64194	0.432363	1.00088	1.05196	0.465498	0.476564	0.409381	0.535467	0.533567
L-Isoleucyl-N~5~-(diaminomethylidene)-L-ornithyl-L-leucyl-N~5~-(diaminomethylidene)-L-ornithyl-L-prolylglycylglycyl-L-lysyl-L-lysine	0.00528167	0.00518064	0.00504445	0.00452519	0.00353387	0.00351596	0.0049185	0.00536233	0.00437481	0.00370215	0.00362565	0.00408331
Lithocholic acid glycine conjugate	0.00276876	0.00385904	0.00352869	0.00278364	0.00277685	0.00246002	0.00282203	0.00311959	0.00294828	0.0055931	0.00483985	0.00287905
Lividomycin B	0.0266169	0.0230167	0.0307814	0.0302858	0.0264588	0.0292449	0.0305044	0.022355	0.0284698	0.021732	0.0304902	0.0354965
L-Kynurenine	0.00860988	0.00492087	0.0036341	0.00397275	0.00639614	0.00702405	0.00568127	0.00415197	0.00608095	0.00698682	0.00616701	0.00599606
L-Lactic acid	8.54546	12.29	9.76659	10.9597	8.82924	7.5507	7.40179	8.84403	9.69306	8.3009	7.88692	10.3956
L-Leucylglycyl-L-seryl-L-phenylalanyl-L-tryptophylglycyl-L-threonyl-L-serine	0.0114292	0.00498944	0.00492053	0.0018649	0.00216617	0.00895269	0.00538481	0.0060656	0.00763377	0.00646686	0.007044	0.00706772
L-Leucylglycyl-L-threonyl-L-tyrosyl-L-isoleucyl-L-alanine	0.2923	0.259435	0.240322	0.251041	0.295511	0.296114	0.292863	0.270186	0.308979	0.247011	0.251173	0.420474
L-Leucyl-L-isoleucyl-L-cysteinyl-L-lysyl-L-tryptophan	0.0660298	0.0629001	0.038144	0.0565983	0.05679	0.0426282	0.0595979	0.0566885	0.0725745	0.0348602	0.0378713	0.0741066
L-Leucyl-L-leucylglycyl-L-prolyl-N~5~-(diaminomethylidene)-L-ornithyl-L-leucyl-L-valyl-L-leucyl-L-alanine	0.0142999	0.028864	0.0248214	0.0298446	0.0233649	0.0155086	0.0222485	0.0215776	0.0220869	0.0289549	0.0203397	0.014548
L-Leucyl-L-threonyl-L-methionyl-L-leucyl-L-isoleucine	0	0.00070073	0.0030154	0.00313193	0.00246901	0	0.00253352	0.00849602	0.000497264	0.000718523	0.00181576	0.00241583
L-Leucyl-L-valyl-L-glutaminyl-L-leucyl-L-leucine	0.122071	0.142266	0.113728	0.0578903	0.0805696	0.0373795	0.0538259	0.0728982	0.105503	0.0416953	0.053987	0.078616
L-Leucyl-L-valyl-L-valyl-L-tyrosyl-L-proline	3.90527	3.92269	3.32242	3.22168	3.41368	3.58414	3.16526	4.32516	3.51562	2.43911	2.52251	4.39384
L-Leucyl-N~5~-(diaminomethylidene)-L-ornithyl-L-tryptophyl-L-serine	0.00428372	0.00459387	0.00557823	0.00666115	0.00767537	0.00645935	0.00499042	0.00583351	0.00713515	0.00713966	0.00477801	0.00513476
L-Lysyl-L-leucyl-N~5~-(diaminomethylidene)-L-ornithyl-N~5~-(diaminomethylidene)-L-ornithyl-L-alanyl-L-seryl-L-leucylglycinamide	0.0210057	0.03075	0.0285284	0.0269179	0.00760064	0.0158794	0.0287313	0.0253417	0.013819	0.00947516	0.0070722	0.0113475
L-Lysyl-L-lysylglycyl-L-histidyl-L-lysinamide	1.02704	1.1807	0.712874	0.335696	0.784619	0.62936	0.798446	0.753756	0.573761	0.309645	0.384736	0.568464
L-Lysyl-L-lysyl-L-phenylalanyl-L-leucyl-L-isoleucyl-L-valyl-L-lysyl-L-lysine	0.0149829	0.0180373	0.0194982	0.0147234	0.0104396	0.0118408	0.0105477	0.0167331	0.0128914	0.0147288	0.0182956	0.0191672
L-Lysyl-L-prolyl-L-lysyl-L-lysyl-L-isoleucyl-N~5~-(diaminomethylidene)-L-ornithyl-L-tyrosyl-L-serine	0.0198612	0.0190323	0.018114	0.0156115	0.0167618	0.0162673	0.0134545	0.019901	0.0159457	0.0167143	0.0177697	0.0168231
L-Lysyl-L-tyrosyl-N~5~-(diaminomethylidene)-L-ornithyl-L-leucyl-L-leucyl-L-prolyl-L-valyl-L-phenylalanine	0.0224316	0.0207972	0.00886179	0.0131881	0.0175453	0.0182015	0.0106783	0.0110682	0.00434527	0.00268367	0.00999532	0.0175583
L-Lysyl-L-tyrosyl-N-ethyl-L-lysinamide	0.0127301	0.017028	0.0181141	0.0146472	0.0061775	0.00665595	0.00852518	0.0126977	0.0137106	0.00958313	0.00626849	0.00811505
L-Lysyl-L-valyl-L-asparaginyl-L-isoleucyl-L-cysteinyl-L-methionine	0.0614935	0.0700858	0.0470245	0.0589247	0.0520331	0.0504278	0.0606928	0.0540339	0.0566076	0.0450055	0.0457128	0.066045
L-Lysyl-N~5~-(diaminomethylidene)-L-ornithyl-L-alanyl-L-tyrosyl-L-leucyl-L-glutaminyl-L-alanyl-N~5~-(diaminomethylidene)-L-ornithine	0.00251191	0.00387415	0.00712708	0.00367124	0.00131656	0.00222595	0.00172644	0.00269992	0.00355181	0.00682522	0.00345601	0.00475934
L-Lysyl-N~5~-(diaminomethylidene)-L-ornithyl-L-glutaminyl-L-lysyl-L-threonine	0.0108888	0.0154782	0.00924358	0.00502845	0.00787931	0.00760273	0.0111184	0.00838254	0.00532684	0.0052909	0.00378627	0.00961175
L-Lyxonamide, 2,4,5-trideoxy-N-(1-(((2-(4-hydroxyphenyl)ethyl)amino)carbonyl)-2-methylpropyl)-2-(((4-methoxyphenyl)methyl)amino)-4-((3-methyl-1-oxo-2-(((phenylmethoxy)carbonyl)amino)butyl)amino)-5-phenyl-, (1(S),4(S))-	0.0751865	0.0604416	0.0763173	0.0554328	0.0643808	0.0661885	0.0655812	0.0642377	0.0626191	0.059005	0.0674966	0.071307
L-Malic acid	0.159038	0.382942	0.117762	0.15208	0.391489	0.230784	0.182599	0.171372	0.155605	0.0988077	0.12816	0.237349
L-Menthyl acetoacetate	0.140982	0.135057	0.207872	0.150235	0.0947594	0.166946	0.150994	0.326782	0.150065	0.169306	0.150451	0.202134
L-Methionine	0.170201	0.2112	0.227624	0.168052	0.10529	0.094664	0.159614	0.140179	0.193647	0.281379	0.154501	0.160944
L-Methionyl-L-histidyl-L-isoleucyl-N~5~-(diaminomethylidene)-L-ornithyl-L-leucyl-L-serine	0.00408328	0.0248906	0.00218984	0.00311693	0.003189	0.00267803	0.015451	0.00637953	0.00342092	0.0048433	0.00201097	0.00431722
L-Methionyl-L-tyrosyl-L-prolylglycyl-L-isoleucine	0.00267282	0.00259712	0.00255759	0.00274569	0.00201339	0.00193614	0.00196714	0.00229848	0.00267763	0.00302274	0.00209236	0.00255485
L-Palmitoylcarnitine	0.0722535	0.0520685	0.0561245	0.080429	0.0670066	0.0860617	0.073303	0.127451	0.0708867	0.081665	0.074148	0.0861711
L-Phenylalaninamide, N-(5-((2-(((1,1-dimethylethoxy)carbonyl)amino)-1-oxo-3-phenylpropyl)amino)-4-hydroxy-1-oxo-6-phenyl-2-(phenylmethyl)hexyl)-L-leucyl-, (2R-(2R*,4S*,5S*(S*)))-	0.0057851	0.00245689	0.00562922	0.00660402	0.00603357	0.00773643	0.0067704	0.00310868	0.0018348	0.00214135	0.00696596	0.00791443
L-Phenylalanine	0.766325	0.862491	0.823418	0.870296	0.871277	0.917786	0.926251	1.04541	0.999536	0.894449	0.687553	0.886249
L-Phenylalanyl-L-prolyl-L-leucyl-L-prolyl-L-alaninamide	0.015757	0.015256	0.0109063	0.0137228	0.0141394	0.0150135	0.0137906	0.0182156	0.0203709	0.0152516	0.0164565	0.0148363
L-Phenylalanyl-L-tyrosyl-L-cysteinyl-L-seryl-L-prolyl-L-glutamine	0.0266482	0.026831	0.0187585	0.0203437	0.0220147	0.0208655	0.0211602	0.0205882	0.0179066	0.0114717	0.0200224	0.0241145
L-Proline	0.0314826	0.0396885	0.0317944	0.0279151	0.0245606	0.0269235	0.0375689	0.0299288	0.0394054	0.0400169	0.0315289	0.0367244
L-Proline, L-valyl-L-leucyl-L-alanyl-L-alanyl-L-leucyl-	0.0363793	0.032809	0.0282934	0.0239396	0.0200073	0.0230196	0.0275134	0.0301237	0.0190378	0.0134694	0.011412	0.0142153
L-Proline, L-valyl-L-leucyl-L-prolyl-L-alanyl-L-alanyl-	3.4864	3.52712	3.35502	3.8745	3.6693	3.59242	5.37696	4.00117	4.09815	4.23602	4.51755	4.27001
L-Prolyl-L-prolyl-L-alanyl-L-alanyl-L-alanylglycylglycyl-L-methionine	0.0167507	0.01617	0.0111437	0.0127875	0.0132777	0.0120212	0.0233277	0.0100234	0.00753273	0.00751473	0.00442905	0.01335
L-Prolyl-L-tyrosyl-L-cysteinyl-L-tryptophyl-L-histidyl-L-tyrosine	0.0213378	0.026594	0.00642369	0.0124304	0.0158842	0.0125566	0.0219324	0.0122058	0.00592526	0.00527333	0.00490686	0.0112862
L-Prolyl-L-valyl-L-lysyl-N~5~-(diaminomethylidene)-L-ornithyl-N~5~-(diaminomethylidene)-L-ornithyl-L-leucyl-L-phenylalanyl-L-leucine	0.00198764	0.00162926	0.00533544	0.00443871	0.0024664	0.0010821	0.00129681	0.00375596	0.00423941	0.00610792	0.00529987	0.00308111
L-Serine, L-arginyl-L-leucyl-L-valyl-L-leucylglycyl-	0.138023	0.118703	0.163698	0.0930103	0.0924452	0.149249	0.147654	0.173515	0.0957323	0.13272	0.0873117	0.105684
L-Serine, L-seryl-L-threonyl-L-seryl-L-asparaginyl-L-leucyl-L-alanyl-	0.0385258	0.0361686	0.0367699	0.0373736	0.0422397	0.0448644	0.0450628	0.0369517	0.0341986	0.0322338	0.033668	0.0454531
L-Seryl-L-histidyl-L-leucyl-L-glutaminyl-L-lysyl-L-tyrosyl-N~5~-(diaminomethylidene)-L-ornithyl-L-leucine	0.000855231	0.00185807	0.00654525	0.00417092	0.000889477	0.00299179	0.00182865	0.00157078	0.00168024	0.00320589	0.00124156	0.0029926
L-Seryl-L-lysyl-L-tyrosyl-L-valyl-L-leucinamide	0.00508365	0.0128724	0.00233403	0.00319314	0.00491433	0.0061764	0.00890221	0.00577959	0.00254101	0.00167747	0.00360938	0.0049852
L-Seryl-L-tyrosyl-L-lysyl-L-methionyl-L-methionine	0.00216683	0.00128233	0.00175882	0.0104504	0.00384161	0.00144042	0.00780634	0.0161203	0.00147572	0.00183787	0.00415054	0.00308304
L-Seryl-N~5~-(diaminomethylidene)-L-ornithyl-L-lysyl-L-isoleucylglycine	0.0899519	0.0820826	0.0658632	0.0780867	0.0852389	0.0858613	0.0877397	0.0870787	0.0814013	0.0810019	0.0763148	0.0892531
L-Threonyl-L-tyrosyl-N~5~-(diaminomethylidene)-L-ornithyl-L-seryl-L-seryl-L-alanyl-L-alanylglycine	0.036405	0.027563	0.0330022	0.0283293	0.0284958	0.0332023	0.0301243	0.0358514	0.0285297	0.0320175	0.0323404	0.0376303
L-Threonyl-L-valyl-L-seryl-L-asparaginyl-N~5~-(diaminomethylidene)-L-ornithyl-L-phenylalanyl-L-serine	0.0284604	0.0216717	0.0228236	0.0199767	0.0188578	0.0261568	0.0208962	0.0271573	0.0200496	0.0248356	0.0192087	0.0211821
L-Tryptophan	0.40825	0.398872	0.281337	0.283219	0.488767	0.508355	0.384608	0.335694	0.387596	0.327331	0.325325	0.433967
L-Tryptophyl-L-leucyl-L-lysyl-L-asparaginylglycylglycine	0.00109138	0.00246655	0.00668282	0.00594581	0.00389122	0.00267184	0.00367722	0.00798331	0.00570893	0.00229485	0.00317323	0.00541523
L-Tryptophyl-N~5~-(diaminomethylidene)-L-ornithyl-L-phenylalanyl-L-lysine	1.01556	0.938687	0.866643	0.920633	1.05854	1.06299	1.04704	0.960165	1.15609	0.885944	1.22214	1.51692
L-Tyrosine	0.311934	0.343475	0.257266	0.267841	0.225398	0.233582	0.271278	0.279193	0.274395	0.298875	0.205164	0.302432
L-Tyrosylglycyl-N~5~-(diaminomethylidene)-L-ornithyl-L-phenylalanyl-L-leucine	0.0221521	0.027925	0.0184212	0.023974	0.0197411	0.0174932	0.0246231	0.0210344	0.0255583	0.0157134	0.0197582	0.0231388
L-Tyrosyl-L-seryl-L-threonyl-L-isoleucyl-L-histidyl-L-prolyl-L-alanyl-L-serine	0.00299039	0.00277063	0.000297916	0.00260946	0.0020718	0.00197998	0.00273863	0.00110258	0.000698444	0.000673286	0.000896842	0.00220544
Lubiminol	0.0440483	0.0168984	0.0329113	0.0379366	0.0153982	0.00582263	0.0562253	0.0480253	0.012759	0.0276301	0.0135501	0.0117109
Lucidenic acid A	0.000702227	0.001059	0.00142226	0.00111701	0.000967687	0.00141438	0.00116272	0.00124664	0.00132252	0.00106878	0.00169321	0.00170195
Lucidenic acid G	0.00789582	0.0290412	0.001483	0.00100447	0.0205437	0.00860122	0.00270617	0.0168419	0.0107731	0	0.00952908	0.0415205
Lucidenic acid M	0.000328681	0.00104378	0.00107265	0.00123427	0.00339029	0.00191476	0.00169461	0.000777204	0.000902654	0.00121748	0.00204403	0.00182661
Lucyoside M	0.00942731	0.00720979	0.00685181	0.00519604	0.00308469	0.00400926	0.00490662	0.00164768	0.000665925	0.00133976	0.0023765	0.0022488
L-Valinamide, N(sup 2)-(((1-carboxy-2-phenylethyl)amino)carbonyl)-L-arginyl-N-(1-formyl-2-phenylethyl)-, (1(S),2(S))-	0.0455314	0.0426675	0.0365225	0.0368365	0.0306579	0.0240379	0.0397842	0.0344833	0.0288358	0.0251159	0.0244053	0.0337765
L-Valine, 2-methylalanyl-L-asparaginyl-L-phenylalanyl-2-methylalanyl-	0.0126767	0.016561	0.0192055	0.0167165	0.00815485	0.00847852	0.0141445	0.00882284	0.00859041	0.0143557	0.00658664	0.00695217
L-Valine, L-threonyl-L-valyl-L-glutaminyl-L-tryptophyl-L-tryptophyl-	0.0101173	0.00369606	0.00637258	0.00541327	0.00410734	0.00889775	0.00848388	0.00968161	0.00850812	0.00586125	0.00917739	0.0109706
L-Valylglycyl-L-leucyl-L-isoleucylglycyl-L-tryptophyl-N~5~-(diaminomethylidene)-L-ornithine	0.0381283	0.0386374	0.0356067	0.0342342	0.0259929	0.0206842	0.0188292	0.0164216	0.0131487	0.011552	0.0183478	0.0128703
L-Valyl-L-alanyl-L-prolyl-L-phenylalanyl-L-prolyl-L-glutamic acid	0.0527089	0.0515259	0.0462995	0.0466255	0.051549	0.0512567	0.0421094	0.0458612	0.0385748	0.0279986	0.0243194	0.055023
L-Valyl-L-lysyl-L-alanyl-L-alanine	0.00490252	0.00924516	0.0157638	0.00786073	0.00760526	0.0105102	0.00972815	0.0112183	0.00950011	0.00735946	0.0152584	0.0127634
L-Valyl-L-seryl-N~5~-(diaminomethylidene)-L-ornithyl-L-lysyl-N~5~-(diaminomethylidene)-L-ornithyl-L-prolyl-N~5~-(diaminomethylidene)-L-ornithine	0.0364878	0.000799228	0.0142123	0.0129793	0.0114204	0.0268351	0.00247543	0.00957727	0.0299882	0.0260761	0.0161684	0.00810439
L-Valyl-L-tyrosyl-3-cyclohexyl-L-alanyl-L-histidyl-L-prolyl-L-phenylalanine	0.00311939	0.00766483	0.00179119	0.000790804	0.00182594	0.00301339	0.0118994	0.00172459	0.00177035	0.000969133	0.00044434	0.00246665
Lyciumin D	0	0.00245411	0	0	0.0348815	0.00661267	0.00617866	0.000276093	0.00415678	0	0	0.00103774
Lycoperoside D	0.0150993	0.0113453	0.0130151	0.00625932	0.00947432	0.0111186	0.0130119	0.0126498	0.00726404	0.00737752	0.0111378	0.0119906
Lys Asn Arg Tyr	0.0356199	0.0316781	0.0270885	0.0248865	0.0292365	0.0268859	0.023201	0.0310284	0.0249408	0.0187201	0.0151989	0.0333757
Lys Asn Arg Val	0.00541454	0.00585079	0.00570318	0.00655234	0.00545185	0.00579346	0.00491618	0.00456797	0.00426537	0.00543123	0.00417495	0.00476149
Lys Asn Leu Tyr Thr	0.0562535	0.0527354	0.0498566	0.0489797	0.0565497	0.0623195	0.0558482	0.0501625	0.0505343	0.0399118	0.0529633	0.0638721
Lys Gln Arg Thr	0.137878	0.130172	0.142422	0.146499	0.163592	0.170104	0.179933	0.146699	0.126865	0.135878	0.133136	0.149131
Lys Glu Arg Phe Ala	0.025704	0.0251071	0.0196454	0.0184167	0.0172794	0.0166652	0.0201632	0.0180528	0.0135048	0.00864667	0.00857358	0.0105837
Lys Lys Lys Val	0.0013158	0.0392205	0.00248829	0.00292003	0.00692297	0.00399853	0.00285516	0.00202304	0.00223874	0.00328914	0.00417178	0.00417203
Lys Lys Met Arg	0.0278238	0.029007	0.024767	0.0251245	0.0299782	0.0274229	0.0298884	0.0304792	0.0263867	0.0274532	0.0271886	0.0326574
Lys-Lys-Arg-Ala-Ala-Arg-Ala-Thr-Ser amide	0.00570704	0.00335838	0.00107217	0.0024819	0.00444843	0.00545199	0.00195823	0.00288267	0.00110693	0.000319609	0.00204881	0.00367446
LysoPA(0:0/18:1(9Z))	0.0215031	0.0213221	0.0220789	0.0217921	0.0228028	0.0212816	0.0219747	0.0241173	0.0219242	0.0246738	0.0216238	0.0231689
LysoPA(0:0/18:2(9Z,12Z))	0.00639527	0.00509758	0.0039126	0.00420676	0.0065223	0.00701351	0.00436436	0.00644787	0.00437433	0.00319048	0.00427754	0.00530473
LysoPA(24:1(15Z)/0:0)	0.069192	0.0655707	0.0705385	0.0665467	0.0599553	0.0571576	0.0718988	0.0721165	0.074925	0.0686043	0.0788185	0.0761765
LysoPA(a-13:0/0:0)	0.00221931	0.00212939	0.00245081	0.00221214	0.00233825	0.00190879	0.0027185	0.00141799	0.00239094	0.00226496	0.00180777	0.0019837
LysoPC(0:0/16:0)	3.19841	3.14993	2.98249	11.7295	2.4052	2.51424	2.45019	12.0336	11.9567	12.2021	3.77014	3.24313
LysoPC(14:/:)	0.0921065	0.104099	0.0639882	0.083339	0.0762043	0.0852076	0.062956	0.0600949	0.0619836	0.0489108	0.0632249	0.0868842
LysoPC(14:0/0:0)	0.0226013	0.0206212	0.0131646	0.0144345	0.0201343	0.0208848	0.0134816	0.0147849	0.0133101	0.00858796	0.00762319	0.0113596
LysoPC(15:0/0:0)	0.0643973	0.0785985	0.131413	0.107575	0.0792332	0.0572288	0.072544	0.1188	0.105753	0.146202	0.124351	0.0943943
LysoPC(16:1(9Z)/0:0)	0.903006	0.790716	0.493095	0.673997	0.777126	0.831029	0.574968	0.670709	0.465438	0.361444	0.668185	0.755433
LysoPC(18:0/0:0)	6.93154	1.5424	1.93153	8.78313	7.13505	6.75415	7.43354	9.66607	1.98759	1.2928	1.75419	9.60071
LysoPC(18:1(9Z)/0:0)	0.338338	0.346562	0.336914	0.349303	0.270766	0.268566	0.312737	0.335383	0.351321	0.334605	0.369017	0.325402
LysoPC(18:3(6Z,9Z,12Z)/0:0)	0.1654	0.165788	0.125409	0.18429	0.0845229	0.0951583	0.141693	0.144028	0.104565	0.0752617	0.116768	0.120681
LysoPC(2:4(5Z,8Z,11Z,14Z)/:)	0.928398	0.985066	0.929376	0.995899	1.01083	0.981382	0.960821	0.977003	1.20433	1.29378	1.21391	1.32484
LysoPC(20:0/0:0)	0.0561004	0.0538694	0.092009	0.0911129	0.0671463	0.032999	0.0684689	0.0979856	0.064735	0.0316842	0.0457193	0.0514328
LysoPC(20:1(11Z)/0:0)	0.30048	0.258839	0.3666	0.25715	0.245083	0.212455	0.252702	0.432397	0.279638	0.220982	0.278823	0.32793
LysoPC(20:2(11Z,14Z)/0:0)	0.146158	0.131441	0.154755	0.136207	0.0882512	0.0925871	0.130884	0.163409	0.134981	0.118715	0.125108	0.156189
LysoPC(20:3(5Z,8Z,11Z)/0:0)	0.416632	0.581643	0.703153	2.19945	0.456223	0.450218	0.505963	2.41027	2.37123	2.01373	0.682472	2.27398
LysoPC(20:5(5Z,8Z,11Z,14Z,17Z)/0:0)	0.264984	0.248493	0.245433	0.258219	0.226166	0.223547	0.266992	0.271993	0.284592	0.256739	0.288881	0.251964
LysoPC(22:2(13Z,16Z)/0:0)	0.00330133	0.00485736	0.00931812	0.00589351	0.00607092	0.00577339	0.00560011	0.0164083	0.00468519	0.00588991	0.00548879	0.00619318
LysoPC(22:4(7Z,1Z,13Z,16Z)/:)	0.588711	0.709683	0.625162	0.637277	0.584095	0.553443	0.597544	0.74911	0.889352	0.672371	0.767841	0.923247
LysoPC(22:5(4Z,7Z,10Z,13Z,16Z)/0:0)	0.08121	0.0678949	0.0511869	0.0734431	0.0608525	0.0722733	0.0469666	0.0523022	0.0730732	0.0599197	0.0832792	0.0789225
LysoPC(22:6(4Z,7Z,10Z,13Z,16Z,19Z)/0:0)	1.2538	1.23572	1.06775	1.08988	0.861103	1.02935	0.874816	1.06801	1.29999	1.03497	1.18883	1.35258
LysoPC(24:0/0:0)	0.00042415	0.00305738	0.00485089	0.00515315	0.00544048	0.00444509	0.00481281	0.00506643	0.00520218	0.00484016	0.00497864	0.00517828
LysoPC(P-18:0/0:0)	0.0917054	0.0826702	0.0994381	0.0769842	0.0415967	0.0549412	0.0563722	0.0803902	0.0613205	0.0821411	0.0651394	0.0861789
LysoPC(P-18:1(9Z)/0:0)	0.0131184	0.0154732	0.0179119	0.0167594	0.0134573	0.0126451	0.0131783	0.0182093	0.018169	0.0168561	0.0168574	0.0181629
LysoPE(:/18:)	1.11542	1.20325	1.13341	1.17842	1.21152	1.2378	1.16326	1.18796	1.4285	1.51174	1.47981	1.59969
LysoPE(:/2:)	0.541914	0.646326	0.549246	0.561736	0.508751	0.4893	0.528979	0.63256	0.750508	0.579235	0.670481	0.831157
LysoPE(:/2:1(11Z))	0.0984595	0.0747805	0.0660846	0.070544	0.0507138	0.0498097	0.0682667	0.0687122	0.0445275	0.0364103	0.0427524	0.0534554
LysoPE(:/2:2(11Z,14Z))	0.608411	0.607173	0.63194	0.687025	0.631902	0.615518	0.703227	0.681338	0.768696	0.749429	0.787457	0.740899
LysoPE(:/2:5(5Z,8Z,11Z,14Z,17Z))	0.0111335	0.0144526	0.0166227	0.0160701	0.00835175	0.011103	0.0106261	0.0096831	0.0159956	0.0258277	0.0228833	0.019258
LysoPE(0:0/16:0)	0.0880339	0.117769	0.127294	0.135399	0.107595	0.0896577	0.110963	0.131721	0.11321	0.181117	0.171851	0.128505
LysoPE(0:0/16:1(9Z))	0.00707048	0.00679688	0.00688352	0.00891206	0.00660705	0.00654542	0.00608745	0.0057754	0.00303669	0.00419811	0.00684508	0.00664273
LysoPE(0:0/18:1(11Z))	0.0826911	0.0880101	0.122825	0.100586	0.0589444	0.0579444	0.0740623	0.0865882	0.0748773	0.107641	0.0819217	0.0747031
LysoPE(0:0/18:2(9Z,12Z))	0.184415	0.210016	0.343178	0.247761	0.0916877	0.104072	0.165574	0.162336	0.163566	0.249965	0.202401	0.167269
LysoPE(0:0/18:3(6Z,9Z,12Z))	0.0729396	0.0802995	0.0972175	0.109104	0.0228127	0.0335772	0.0503608	0.050901	0.037499	0.061106	0.0501655	0.0411879
LysoPE(0:0/20:1(11Z))	0.0282582	0.0209986	0.0191869	0.0196001	0.0165053	0.0167061	0.0200655	0.0221712	0.0163166	0.00966916	0.0121795	0.0159332
LysoPE(0:0/20:3(11Z,14Z,17Z))	0.0918469	0.0939627	0.145152	0.110533	0.0469981	0.062355	0.0686592	0.0837194	0.123674	0.123787	0.0976992	0.0851365
LysoPE(0:0/20:4(5Z,8Z,11Z,14Z))	0.144755	0.167445	0.260083	0.182515	0.110748	0.148966	0.139816	0.161598	0.183601	0.244518	0.165651	0.200912
LysoPE(0:0/20:5(5Z,8Z,11Z,14Z,17Z))	0.0957735	0.131542	0.139851	0.117913	0.0603833	0.0875436	0.0839946	0.0837596	0.12646	0.19693	0.172194	0.149712
LysoPE(0:0/22:0)	0.117337	0.102265	0.263606	0.168628	0.104599	0.0828329	0.116106	0.217913	0.168747	0.0717835	0.0996545	0.159186
LysoPE(0:0/22:1(13Z))	0.0295766	0.0221948	0.0284674	0.02053	0.0193741	0.0191838	0.022861	0.0297782	0.0197788	0.0180629	0.0187414	0.0238598
LysoPE(0:0/22:2(13Z,16Z))	0.00824833	0.00967039	0.0122509	0.00827483	0.00554692	0.00578934	0.00886706	0.0104791	0.00936312	0.00822536	0.00705708	0.00987071
LysoPE(0:0/22:4(7Z,10Z,13Z,16Z))	0.183943	0.185268	0.152886	0.15046	0.157562	0.168031	0.140691	0.194781	0.159571	0.108789	0.113282	0.202309
LysoPE(0:0/22:5(4Z,7Z,10Z,13Z,16Z))	0.00351723	0.0037753	0.00391846	0.00301092	0.00215185	0.00253042	0.00261358	0.00296477	0.00316285	0.00446906	0.00383476	0.00474984
LysoPE(0:0/22:6(4Z,7Z,10Z,13Z,16Z,19Z))	0.345835	0.398092	0.440919	0.387998	0.223973	0.276903	0.25562	0.307627	0.391317	0.593797	0.4643	0.458007
LysoPE(0:0/24:6(6Z,9Z,12Z,15Z,18Z,21Z))	0.000476151	0.00105954	0.003696	0.00323012	0.00358972	0.00274455	0.00343602	0.00365974	0.002828	0.00287772	0.00286162	0.00404965
LysoPE(P-16:0/0:0)	0.0138984	0.0135726	0.021207	0.0192985	0.00731711	0.00881746	0.00914822	0.0139336	0.0133963	0.0164306	0.0142524	0.0132002
LysoPI(16:0/0:0)	0.0353988	0.0410533	0.041096	0.0349873	0.0188265	0.0309566	0.0368996	0.0320003	0.0257651	0.0186336	0.0228524	0.0268002
LysoPI(18:1(9Z)/0:0)	0.00253865	0.0018734	0.00289391	0.00278057	0.00286102	0.0040413	0.00329608	0.00641046	0.00800419	0.00343538	0.00633974	0.00930379
LysoPI(2:4(5Z,8Z,11Z,14Z)/:)	1.09291	1.04076	1.06359	0.892553	0.475328	0.84998	0.621205	0.614164	0.853026	0.325214	0.475164	0.635766
LysoPI(20:0/0:0)	0.00151601	0.00310453	0.00896498	0.0071725	0.00445384	0.00297776	0.0044105	0.00897377	0.00597759	0.00298514	0.0039134	0.00667618
Lysyl-phenylalanyl-isoleucyl-glycyl-leucyl-methioninamide	0.00159551	0.0016817	0.0088016	0.00352436	0.000371318	0.00268116	0.00369771	0.00595179	0.00123432	0.00354413	0.00264072	0.00350337
M(IP)2C(d18:0/26:0)	0.00290061	0.00328605	0.00323107	0.00291383	0.00311081	0.00303047	0.00282229	0.00263213	0.00315869	0.00263089	0.00293598	0.00294927
Maclurin	0.023949	0.0123803	0.0178374	0.0171505	0.0198843	0.0234648	0.0414931	0.00946034	0.0112064	0.00906575	0.0085101	0.00978862
Macrocarpal I	0.00523609	0.00533267	0.00374927	0.00405021	0.00525063	0.00531128	0.00346845	0.00386289	0.00334877	0.00202171	0.00181913	0.00292048
Mactraxanthin	0.00087393	0.00497754	0.00122345	0.00899642	0.00827696	0.00727149	0.00664698	0.00928223	0.0103082	0.00894642	0.0106499	0.0110604
Maduramicin	0	0	0.00224329	0.00273558	0.00354569	0.00082004	0.00553108	0.00756595	0.00132159	0.00479039	0.00411054	0.00551566
Magnesium zinc hydroxide (1/1/4)	0.139033	0.064551	0.0745245	0.0569361	0.0659784	0.059264	0.0783764	0.0789413	0.0384979	0.0439111	0.0335494	0.0466171
Malachite green oxalate	0	0.00071872	0.00146485	0.000779708	0.000940383	0.000906248	0.0016676	0.00214314	0.00121741	0.00166437	0.00114208	0.00189307
Malaoxon	0.0116827	0.0333462	0.0168726	0.0308631	0.0232899	0.018581	0.0157164	0.0177406	0.0253247	0.0179944	0.0162695	0.0168194
Mammeigin	0.0737217	0.23908	0.0772857	0.0711449	0.0579918	0.0835878	0.0946488	0.20044	0.0947034	0.124157	0.116668	0.174433
Mangostanol	0.00441034	0.0262126	0.00485376	0.00559263	0.00396531	0.00727108	0.0173686	0.0203896	0.00751507	0.016995	0.0110085	0.0139449
Mannosyl-inositol-phosphorylceramide	0.0213832	0.023722	0.0256026	0.0288231	0.0330115	0.0284702	0.0301799	0.0334254	0.0301643	0.0277562	0.0255091	0.0289043
Marmesin rutinoside	0.0178128	0.0120264	0.00207512	0.00427584	0.0105623	0.00461578	0.00921586	0.00308256	0.00201011	0.00251169	0.00127068	0.00635766
Matesaponin 4	0.0208931	0.0196257	0.0179972	0.0204129	0.0140066	0.015179	0.0342212	0.0160007	0.0195826	0.0128617	0.0225752	0.0188867
Medicagenic acid 3-O-beta-D-glucoside	0.0695613	0.0816259	0.0357393	0.0277012	0.0541375	0.0443004	0.0586153	0.0480701	0.0347823	0.0183577	0.0213508	0.0414159
Medroxyprogesterone	0.00339136	0.00311626	0.00537198	0.00207953	0.000735642	0.00331907	0.00381384	0.00799752	0.00242067	0.00410188	0.00227597	0.00364695
Meperidine	0.00145581	0.0026992	0.0011595	0.00118962	0.0027826	0.00360195	0.00263245	0.00322348	0.00227367	0.00327213	0.00340755	0.00488042
Mequitazine	0.0401245	0.0221612	0.0281255	0.0141669	0.0375556	0.0164549	0.0844504	0.0330162	0.0245252	0.0586166	0.0560093	0.0334551
Meropenem	0.0255058	0.0288669	0.022064	0.0269332	0.027261	0.0259092	0.0253103	0.0316834	0.0286462	0.0313387	0.033521	0.0327513
Met Gln Pro Arg Val	0.0444304	0.0295386	0.0517102	0.034115	0.000906909	0.00687853	0.00537841	0.0145186	0.0148442	0.0160824	0.0200475	0.0225913
Meta-hydroxyphenylhydracrylic Acid	0.072801	0.0698759	0.0600703	0.0438333	0.0590732	0.0674164	0.0472319	0.0667731	0.0476278	0.0612306	0.0384505	0.0563757
Methacycline	0.000277167	0.000726986	0.000683387	0.000600845	0.000332825	0.00120728	0.00210608	0.000571249	0.000351399	0.000325961	0.00232606	5.89e-05
Methanediazonium	0.0143576	0.0164364	0.0149591	0.0140135	0.0159397	0.0160089	0.0104392	0.0186635	0.012343	0.0130017	0.0114921	0.014294
Methanesulfonic acid, amino-	0.0236167	0.0264603	0.0243806	0.0250467	0.0264174	0.0294318	0.0171371	0.0342618	0.0234645	0.0235869	0.0213939	0.0260266
Methimazole	0.00339635	0.00327824	0.00394474	0.00368189	0.00382216	0.00364532	0.0036902	0.00331995	0.00383534	0.00340477	0.00368556	0.0032376
Methocarbamol	0.0276279	0.019719	0.0154266	0.013543	0.0251018	0.036018	0.0140152	0.0357737	0.0182228	0.0212456	0.0183213	0.0244405
Methoxsalen	5.57995	7.59031	6.09631	6.84713	7.82125	5.67237	6.53757	6.12743	8.76121	8.78075	7.11964	7.70132
Methyl (7Z,9Z,9'Z)-6'-apo-y-caroten-6'-oate	0.00919301	0.00881749	0.00796419	0.00829872	0.00896642	0.00841117	0.00784599	0.00861562	0.00802646	0.00774129	0.00737427	0.00777246
Methyl (Z)-5-(5-methyl-2-thienyl)-2-penten-4-ynoate	0.00707965	0.00677045	0.0062213	0.00652151	0.00765419	0.00714764	0.00600859	0.00465825	0.00198939	0.00278179	0.00110917	0.00260724
Methyl 1-(1-propenylthio)propyl disulfide	0.0298691	0.0284207	0.0242305	0.019809	0.0371958	0.0349238	0.0274607	0.0232017	0.0254491	0.0154482	0.0272775	0.0206545
Methyl 2-phenyloctadec-2-enoate	0.0105279	0.0112758	0.0109295	0.0131203	0.014188	0.0146632	0.0165383	0.0211421	0.0223904	0.0232671	0.0238193	0.0265585
Methyl 3,4,6-tri-O-galloyl-beta-D-glucopyranoside	0	0	0.000605717	0.000402699	0.000835807	0	0.00145018	0.00192367	0	0	0.00209502	0.000763844
Methyl 3-carbazolecarboxylate	0.0158534	0.021913	0.0173631	0.0245234	0.0205404	0.0210748	0.0152263	0.0213687	0.023636	0.0240786	0.0175487	0.0200149
Methyl Arachidonate	0	0.00219138	0.00467892	0.00348517	0.00416432	0.00227304	0.00351945	0.00550927	0.00280436	0.00270861	0.00379268	0.00431837
Methyl linoleate	0.00047639	0.00231287	0.00519122	0.00479197	0.00414297	0.00245073	0.00432235	0.00559465	0.00391553	0.00442438	0.0058984	0.00428027
Methyl Phenylglyoxalate	0.051693	0.0545447	0.0411185	0.0414922	0.0362458	0.0380451	0.0419752	0.0458524	0.0442901	0.0477821	0.0312734	0.0464746
Methyl propenyl ketone	0.00319363	0.00315564	0.00248244	0.00330952	0.00233939	0.00264463	0.00260817	0.00290872	0.00278607	0.00333063	0.00237294	0.00347713
Methyl protogracillin	0.0168425	0.0186696	0.0184141	0.0142747	0.00560203	0.0102335	0.00614242	0.01003	0.0143323	0.0180406	0.0158676	0.0183672
Methyl-[10]-shogaol	0.057083	0.0528327	0.0924232	0.0462438	0.016654	0.074363	0.0565877	0.0970373	0.0289991	0.0501868	0.0389766	0.0684148
Methylmalonic acid	0.093022	0.414824	0.185994	0.164464	0.350222	0.308066	0.333616	0.662541	0.160347	0.120934	0.172964	0.404207
Metyrosine	0.118642	0.105595	0.11417	0.103846	0.100191	0.109517	0.10544	0.0897985	0.0802332	0.0993861	0.111624	0.130325
MG(:/18:2(9Z,12Z)/:)	0.0510261	0.057337	0.0557196	0.0637426	0.0697884	0.0731765	0.0788588	0.108233	0.121807	0.127791	0.130455	0.144315
MG(0:0/16:0/0:0)	0.00146383	0.00230873	0.00361382	0.00373286	0.00527552	0.00294649	0.00337867	0.0044614	0.00356934	0.00369797	0.00376552	0.00340771
MG(0:0/18:3(6Z,9Z,12Z)/0:0)	0.0194881	0.0205019	0.0275988	0.0192437	0.0136621	0.0168619	0.0131309	0.021716	0.0228577	0.0179597	0.0176359	0.015778
MG(0:0/20:1(11Z)/0:0)	0.00785011	0.00849409	0.00854915	0.00934047	0.00825541	0.00914584	0.00999082	0.0100555	0.0112591	0.0119524	0.0113586	0.0128382
MG(18:0/0:0/0:0)	0	0.000788382	0.00219235	0.00154863	0.00439085	0.00142798	0.00181236	0.00391948	0.00237864	0.00229869	0.00232173	0.00257562
Milrinone	0.00212473	0.000777517	0.000816344	0.000585556	0.00117082	0.00242832	0.000711932	0.00261163	0.00182343	0.00256922	0.00181416	0.00165994
MIPC(d18:0/18:0(2OH))	0.0113557	0.00770837	0.00394528	0.00618177	0.0112233	0.0124451	0.00609215	0.00932549	0.00461665	0.00245859	0.00541187	0.00873858
MIPC(d18:0/18:0)	0.00119108	0.00191728	0.00174111	0.00220056	0.00149989	0.0011671	0.00151259	0.00121857	0.00241876	0.00291556	0.00228647	0.00216014
MIPC(d18:0/20:0(2OH))	0.0114504	0.0113249	0.010394	0.0109787	0.00857548	0.00889144	0.00903617	0.0109895	0.0107398	0.0107331	0.0113264	0.0112189
MIPC(d18:0/22:0(2OH))	0.196576	0.161525	0.156954	0.153677	0.163418	0.157903	0.147263	0.201073	0.125579	0.106378	0.19337	0.187582
MIPC(d18:0/24:0(2OH))	0.0128444	0.015683	0.0183856	0.0181672	0.016795	0.0145613	0.0162438	0.0203893	0.0196096	0.0170248	0.0174677	0.0194344
MIPC(d18:0/26:0(2OH))	0.0019216	0.00189982	0.00194599	0.00173823	0.00199387	0.00192001	0.00189831	0.00206339	0.00200877	0.00193357	0.00193529	0.00212822
MIPC(d18:0/26:0)	0.00286858	0.00241065	0.00303549	0.00298062	0.00340782	0.00316114	0.00288812	0.00290253	0.00304687	0.00344567	0.00305271	0.00318942
MIPC(t18:0/22:0(2OH))	0.00672533	0.00710273	0.00705555	0.00780674	0.00767765	0.00725459	0.00744263	0.00813486	0.00907813	0.00901225	0.00616471	0.00820303
MIPC(t18:0/24:0(2OH))	0.0967921	0.0883519	0.0804632	0.105519	0.0968191	0.108381	0.0959056	0.100729	0.113411	0.0720079	0.0842954	0.11863
MIPC(t20:0/26:0(2OH))	0.00561308	0.00556134	0.00546256	0.00562063	0.00670307	0.00577296	0.00528702	0.00507804	0.00636622	0.00533566	0.00594603	0.00597233
Miripirium	0.00791802	0.00907421	0.00833477	0.00927981	0.00708662	0.00765235	0.00832479	0.00813171	0.00817079	0.00901662	0.00953983	0.00943513
Misoprostol	0.00182984	0.0020197	0.00231891	0.00257919	0.0027401	0.00223559	0.00343605	0.00227981	0.00366239	0.0029832	0.00374765	0.00423662
Mivacurium	0.00605738	0.0076273	0.00996106	0.00815427	0.00196951	0.00395052	0.00302441	0.0042704	0.00828819	0.0160698	0.0114645	0.0106988
Momordicoside K	0.0480877	0.038683	0.0352469	0.025554	0.0358745	0.0470479	0.0344385	0.0561377	0.0238296	0.034805	0.0216847	0.0242635
Monoethanolamine myristate	0.0391563	0.013051	0.012787	0.0307038	0.0145416	0.0202459	0.0164398	0.0397282	0.0143369	0.0142399	0.0270868	0.015543
Montecristin	0.000358666	0.000570935	0.000492439	0.000545845	0.000636848	0.000374425	0.000141694	0	0.000700192	9.6e-05	0	6.57e-05
Morphiceptin	0.0664523	0.0857826	0.052216	0.0568743	0.0377679	0.0345186	0.0447166	0.0599552	0.0583315	0.0641934	0.0513246	0.0435313
Morphine-3-glucuronide	0.0109748	0.0123978	0.0173715	0.0133304	0.00582157	0.00999331	0.0139098	0.0214946	0.00518227	0.00869754	0.00957279	0.012455
Moschamine	0.0124231	0.0172287	0.0122994	0.0146107	0.0145924	0.0144981	0.0151715	0.0138446	0.00910819	0.00664152	0.00330538	0.00625629
Muricoreacin	0.00176175	0.0119798	0.00262805	0.0157783	0.0161017	0.011992	0.0122762	0.0153727	0.017662	0.0162274	0.0155936	0.0181402
Murrayacinine	0.160966	0.107646	0.0902997	0.109299	0.125896	0.154937	0.136279	0.144842	0.086473	0.143489	0.102533	0.0762838
myo-Inositol	0.0704713	0.0912474	0.0749712	0.0899076	0.105423	0.0674508	0.0773487	0.0802738	0.219821	0.173127	0.1302	0.123736
Myricatomentoside II	0.00290766	0.00273142	0.00241041	0.00172575	0.0042446	0.00299081	0.00323131	0.00398627	0.00412676	0.00329604	0.00169326	0.00221294
Myristic acid	0.005896	0.00149715	0.00769907	0.00472479	0.00402752	0.00676624	0.00255894	0.00401001	0.00434251	0.00197412	0.00719683	0.00307911
Myroridin KA (9CI)	0.00787293	0.010798	0.0039956	0.00820743	0.00388554	0.00491064	0.0115997	0.00585465	0.00533809	0.00382338	0.00297327	0.00530795
Mytiloxanthin	0.0485148	0.129375	0.0524237	0.0756091	0.0565991	0.02275	0.0534995	0.0642249	0.0701618	0.0242398	0.0197133	0.0292128
Mytilus Small cardioactive peptide	0.00336282	0.00428333	0.00281728	0.00360049	0.00435947	0.00634384	0.00757034	0.00261178	0.00529635	0.00450062	0.00238143	0.00355089
N(1)-isopropyl-2-methylpropan-1,2-diamine	0.00139537	0.0132583	0.00204152	0.018972	0.0160173	0.0141015	0.0149554	0.0130927	0.01334	0.0232605	0.0233836	0.0236664
N-(14-Methyl-3,6,9,12-tetrakis(2-methylallyl)-3,6,9,12-tetraazapentadec-14-en-1-yl)nonan-1-amide	0.0022128	0.00177485	0.00180946	0.00108887	0.00146352	0.00185772	0.0016352	0.00217383	0.00195401	0.00183938	0.00131908	0.00176367
N-(1-Deoxy-1-fructosyl)leucine	0.00118429	0.00144004	0.00139524	0.00232613	0.00184394	0.00214522	0.00207738	0.00139686	0.00198847	0.00274086	0.00132581	0.00132157
N-(2-(4,5-Dihydro-2-undecyl-1H-imidazol-1-yl)ethyl)ethylenediamine	0	0	0.00234267	0.0010764	0.00197671	0.0189239	0.00192068	0.00760508	0.00115875	0.00231446	0.00128971	0.000615655
N-(4-Hydroxyphenyl)acetamide--morpholine (2/5)	0.0199105	0.0141219	0.0171766	0.0117166	0.0134678	0.0159322	0.0143384	0.0160927	0.0149994	0.0124004	0.0142318	0.0129862
N-(4-hydroxyphenyl)ethoxycarbothioamide	0.0198197	0.0219606	0.028108	0.0166646	0.00852453	0.00968815	0.0135648	0.015796	0.0230043	0.0283732	0.0218752	0.0224121
N-(4-methylphenyl)-1,2,4,4-tetraphenyldiazetidin-3-imine	0.00556165	0.0119486	0.00309639	0.0026845	0.00385191	0.00519326	0.0148214	0.0054003	0.00445244	0.00562956	0.0038623	0.00753136
N-(5-Amino-2-hydroxybenzoyl)glycine	0.0266125	0.0113791	0.0108705	0.00684529	0.0129708	0.0381865	0.00969169	0.0340761	0.021096	0.032902	0.0219819	0.01983
n'-(6-methoxyquinolin-8-yl)-n,n-dioctylhexane-1,6-diamine	0	0.00122407	0.00353073	0.00398917	0.0039941	0.00316534	0.00405366	0.00437406	0.00340369	0.00368955	0.00374467	0.00376265
N-(Bis(phosphono)methyl)-N-methyl-L-aspartic acid	0.0300177	0.0391507	0.0422498	0.0381657	0.0126211	0.044279	0.00578706	0.0459825	0.0449147	0.0513563	0.0516252	0.0477014
N(tele)-methylhistaminium	0.0102663	0.00559736	0.00541515	0.00569012	0.00537261	0.00359549	0.00704793	0.0109893	0.0142103	0.0167324	0.00955574	0.00559612
n,1-ditritylhistidine	0.0425537	0.103233	0.0595208	0.121213	0.11092	0.052419	0.0506131	0.208026	0.055663	0.0360241	0.0442534	0.0476081
N,N'-((6-Phenyl-1,3,5-triazine-2,4-diyl)bis(imino(9,10-dihydro-9,10-dioxoanthracene-5,1-diyl)))bis(benzamide)	0.00799695	0.0104213	0.0219399	0.0197224	0.0126418	0.0114323	0.0202187	0.00486972	0.00993519	0.0272567	0.0205301	0.0190636
N,N'-(Ethane-1,2-diyl)bis[N-(3-methylbutyl)dodecanamide]	0.00986378	0.0123138	0.019513	0.0139901	0.0113669	0.0110742	0.014971	0.0167539	0.0223519	0.0266525	0.0217488	0.0159091
N,N,N',N',N'',N''-Hexabutylphosphoric triamide	0.00378924	0.00289538	0.00388779	0.00273974	0.00304173	0.00300633	0.00435902	0.00778981	0.00368054	0.00519871	0.00354059	0.00389753
N,N-Didesmethyltramadol	0.00139502	0.000995752	0.00178487	0.00213384	0.00126	0.00725207	0.00221631	0.00215105	0.00196844	0.00361914	0.00191159	0.00176462
n,o-bis[(benzyloxy)carbonyl]tyrosine	0.0183662	0.00265149	0.00357567	0.0108441	0.00465797	0.00885001	0.00746935	0.00919884	0.00256709	0.00257447	0.00902154	0.00367429
N-[(3,5-ditert-butyl-4-hydroxyphenyl)methyl]-2-dimethoxyphosphorylacetamide	0.0250385	0.050241	0.0400205	0.0293111	0.0212414	0.0266078	0.0201084	0.0688884	0.0328794	0.0271762	0.0197107	0.0137863
N-[(3a,5b,7a,12a)-3,12-dihydroxy-24-oxo-7-(sulfooxy)cholan-24-yl]-Glycine	0.0853619	0.0818944	0.10411	0.0785398	0.0391179	0.0525647	0.0667206	0.0549731	0.0622804	0.072194	0.0603432	0.058627
n-[(benzyloxy)carbonyl]-s-tritylcysteinylglycylglycylglycine	0.0129933	0.0152757	0.0102151	0.0147224	0.0108066	0.0111226	0.0237307	0.00882977	0.0082883	0.0105626	0.00906721	0.0090489
N-[1-(Octadecyloxy)-4-(2H-tetrazol-5-yl)butan-2-yl]acetamide	0.00933485	0.00787645	0.0136734	0.0138717	0.0151873	0.0127716	0.0142325	0.0154962	0.0136104	0.0136819	0.0136767	0.0143161
N-[6-[bis-(4-methylphenyl)sulfonylamino]hexyl]-4-methyl-N-(4-methylphenyl)sulfonylbenzenesulfonamide	0.00684062	0.00500148	0	0.00220135	0.00372123	0.00377854	0.00363155	0.000257589	0	0	0	0.00168316
N~1~,N~15~-Bis(benzyloxy)pentadecanediamide	0.258844	0.270713	0.265842	0.27444	0.282597	0.293757	0.277311	0.284044	0.344792	0.364336	0.351183	0.380022
N~2~,N~2~,N~2'~,N~2'~,N~7~,N~7~,N~7'~,N~7'~-Octakis(4-methoxyphenyl)-9,9'-spirobi[fluorene]-2,2',7,7'-tetramine	0.048784	0.0650678	0.0812221	0.0683506	0.107326	0.0870216	0.0626374	0.111789	0.0777564	0.0858137	0.0613926	0.0685562
N~2~-Dodecanoyl-N~1~,N~5~-dioctadecyl-L-glutamamide	0.00711909	0.00649927	0.00672159	0.00726488	0.00656754	0.00678692	0.00639902	0.00778337	0.006885	0.00761223	0.00647359	0.00811834
N~5~-(Diaminomethylidene)-D-ornithyl-D-phenylalanyl-D-prolyl-N~5~-(diaminomethylidene)-D-ornithyl-D-valinamide	0.00139776	0.00502326	0.00251173	0.00200295	0.00414529	0.00351067	0.00381965	0.00170842	0.00214248	0.00270646	0.00825847	0.00369922
N~5~-(Diaminomethylidene)-L-ornithyl-L-lysyl-L-leucyl-L-phenylalanylglycine	0.00292396	0.00362541	0.0187611	0.0189626	0.0130629	0.00425079	0.0141856	0.0387538	0.00890494	0.00597321	0.0102786	0.0145271
N~5~-(Diaminomethylidene)-L-ornithyl-L-lysyl-L-lysyl-N~5~-(diaminomethylidene)-L-ornithyl-L-prolyl-N~5~-(diaminomethylidene)-L-ornithyl-N~5~-(diaminomethylidene)-L-ornithine	0.0333456	0.0323535	0.0290738	0.0293821	0.0279519	0.0267106	0.0233548	0.03141	0.024857	0.0263566	0.028462	0.0275497
N~5~-(Diaminomethylidene)-L-ornithyl-L-lysyl-L-tyrosyl-L-seryl-L-valine	0.108976	0.144607	0.0572505	0.0671412	0.0676801	0.0307716	0.062607	0.0619384	0.0809806	0.0323422	0.037839	0.0692109
N~5~-(Diaminomethylidene)-L-ornithyl-L-phenylalanyl-L-valyl-L-prolyl-L-alpha-aspartylglycyl-L-asparaginyl-N~5~-(diaminomethylidene)-L-ornithyl-L-isoleucine	0.0188954	0.0136885	0.00685464	0.00229286	0	0.00204638	0	0.00380331	0.00900038	0.00904252	0.00555414	0.00633356
N~5~-(Diaminomethylidene)-L-ornithyl-L-tyrosyl-D-alanylglycyl-L-phenylalaninamide	0.0316834	0.0344361	0.0377768	0.0371835	0.042588	0.0395958	0.0375795	0.0418757	0.0414082	0.0367808	0.037788	0.041172
N~5~-(Diaminomethylidene)-L-ornithyl-L-valylglycyl-L-leucyl-L-isoleucylglycyl-L-tryptophyl-N~5~-(diaminomethylidene)-L-ornithine	0	0	0.00105753	0.000760067	0.00181381	0.000309507	0.00121669	0.00378405	0.000119104	0.00059375	0.00127226	0.0026365
N~5~-(Diaminomethylidene)ornithyl-N~5~-(diaminomethylidene)ornithylleucylisoleucyl-alpha-glutamyl-alpha-aspartylasparaginyl-alpha-glutamyltyrosylthreonylalanyl-N~5~-(diaminomethylidene)ornithylglycine	0.00754567	0.00617192	0.00343476	0.00575883	0.002349	0.00714045	0.00649979	0.00292078	0.00477401	0.00426789	0.00243453	0.00622755
N~9~,N~10~-Bis(4-butylphenyl)-N~9~,N~10~-bis(4-methylphenyl)phenanthrene-9,10-diamine	0.0322451	0.0468002	0.0187702	0.0212925	0.0233465	0.0105729	0.0203297	0.0203843	0.0276712	0.00929332	0.0113956	0.0183374
N1-Methyl-2-pyridone-5-carboxamide	0.0281811	0.0385291	0.0705946	0.0555752	0.0460058	0.045384	0.0397977	0.0660626	0.0725839	0.113543	0.0836249	0.0577658
N4-Acetylcytidine	0.024373	0.00844351	0.00391425	0.0108789	0.0119286	0.0189609	0.0269264	0.0110757	0.0042564	0.00254306	0.00210116	0.0115284
N6-Carbamoyl-L-threonyladenosine	0.000926236	0.00579642	0.000776202	0.00809527	0.00623219	0.00561975	0.00600873	0.00426866	0.00523178	0.010617	0.0119848	0.0125927
N-Acetyl-3-{5-[(E)-(4-arsonophenyl)diazenyl]-3-[2-(4-arsonophenyl)hydrazinylidene]-4-oxocyclohexa-1,5-dien-1-yl}-L-alanine	0.00198706	0.00179054	0.0105356	0.00478563	0.00403531	0.00274996	0.0040945	0.0091784	0.00399902	0.00836015	0.0102651	0.00308998
N-Acetylglucosaminyl-diphosphodolichol	0.00410715	0.00304527	0.0019262	0.00269411	0.00236615	0.00369098	0.00370425	0.00205845	0.00311854	0.00227961	0.00173603	0.00342058
N-Acetylisoleucine	0.015841	0.0129414	0.0107287	0.00817669	0.0166195	0.0257591	0.00947986	0.0252087	0.0109391	0.0139587	0.012069	0.0143462
N-Acetyl-L-glutamyl 5-phosphate	0.0207423	0.0216365	0.0220939	0.0213528	0.0233604	0.020589	0.0202875	0.0253082	0.0320784	0.0321111	0.0290046	0.0264889
N-Acetyl-L-methionine	0.00995609	0.0148266	0.0140133	0.0125636	0.0204668	0.0154981	0.0162004	0.0172763	0.00799388	0.00205359	0.00804063	0.0095686
N-Acetyl-L-phenylalanine	0.0205692	0.0260957	0.0291297	0.0237493	0.0335893	0.037794	0.0274997	0.0338985	0.028697	0.0359261	0.0228072	0.0257301
N-Acetyl-L-threonyl-L-alanyl-L-seryl-L-histidyl-L-histidyl-L-lysinamide	0.0149368	0.0230517	0.00671487	0.00991239	0.00943154	0.00413972	0.0118719	0.00807218	0.00951694	0.00344075	0.00424795	0.00876023
N-Acetyl-L-valyl-L-valyl-L-valyl-L-valyl-L-valyl-N-methyl-L-valinamide	0.00025976	0.00511119	0.00106806	0.00108356	0	0	0.00214889	0.000875515	0.000205183	0	0.000194611	0.00022649
N-acetylsphingosine 1-phosphate	0.676504	0.761596	0.737368	0.73086	0.706432	0.705456	0.70298	0.801429	0.786853	0.833477	0.810117	0.891053
N-acetyltryptophan	0.0025941	0.00410379	0.00301452	0.0013442	0.00408929	0.0048755	0.001908	0.00188944	0.00262863	0.00296836	0.00334468	0.00347771
NADA	0.0230275	0.038141	0.0326036	0.0239527	0.0122939	0.0121312	0.0131006	0.0169366	0.0304715	0.0210388	0.0141225	0.0107582
Na-Hexanoyl-Nb-inosityltryptophan	0.0252478	0.0443064	0.0135192	0.0125344	0.0171069	0.0225644	0.0569975	0.0195512	0.018535	0.0246387	0.0211928	0.040806
Naktiivql nanopeptide	0.0219499	0.0320686	0.0486362	0.0390218	0.0160358	0.0166084	0.0289049	0.0242071	0.0252761	0.0384166	0.02849	0.0232389
N-alpha-Acetyl-nona-D-arginine amide acetate	0.00605882	0.00641366	0.00630795	0.00643228	0.00741557	0.00718746	0.00534996	0.00609758	0.00743485	0.00651333	0.00522256	0.00617348
NAPE(18:1(9Z)/16:1(9Z)/18:0)	0.0038796	0.0033499	0.00325452	0.00347979	0.00363441	0.00375076	0.00318318	0.00386799	0.00369278	0.00357889	0.00325457	0.00397343
Naphthalenesulfonic acid, diisononyl-, compd. with 1,2-ethanediamine (2:1)	0.00790698	0.00619358	0.00598013	0.00576974	0.00339519	0.00348522	0.00478405	0.00549957	0.00375269	0.0025968	0.00452944	0.00465322
N-arachidonoyl glutamine	0.0171227	0.0233588	0.0255144	0.0280027	0.0198681	0.0174688	0.0228814	0.0272562	0.0222532	0.0363936	0.0334926	0.0270471
Narasin	0.00680393	0.008413	0.00474862	0.00445971	0.00398255	0.00236146	0.00195371	0.00289018	0.0026018	0.00293683	0.00213329	0.00126018
Nb-Arachidoyltryptamine	0.0038431	0.00371795	0.00278336	0.00328101	0.00366641	0.00319412	0.00320079	0.00484645	0.00473747	0.00496756	0.00541521	0.00517503
N-Benzoyl-5'-O-(bis(4-methoxyphenyl)phenylmethyl)-2'-deoxyadenosine 3'-O-succinate	0.011576	0.00822213	0.0102391	0.00808498	0.00465611	0.00828494	0.00667338	0.00471617	0.00216907	0	0.000383551	0.00245183
N-Benzoyl-L-valyl-L-prolyl-N~5~-(diaminomethylidene)-N-(4-nitrophenyl)-L-ornithinamide	0.0140441	0.0135766	0.0120016	0.0118898	0.0142619	0.0117483	0.0119971	0.0154109	0.0128629	0.0109659	0.0127126	0.0135775
N'-Benzyl-N-[1-(3,3-diphenylpropyl)piperidin-4-yl]-N-ethylurea	0.0236575	0.0448527	0.0299886	0.0309112	0.0183827	0.0132373	0.0196693	0.0312328	0.0349235	0.0518258	0.0345968	0.0235188
Nb-Palmitoyltryptamine	0.00486529	0.00660093	0.00628924	0.00605621	0.00704855	0.00708617	0.00734102	0.0101411	0.00940407	0.0104383	0.00978835	0.0113327
Nb-Stearoyltryptamine	0.00238088	0.00304383	0.00264835	0.00259553	0.00263212	0.00249178	0.00275991	0.00264067	0.00297638	0.00302643	0.00299447	0.00321183
Necatorine	0.0136265	0.0203907	0.0211693	0.0127917	0.0119443	0.0185954	0.0402372	0.0218349	0.0162682	0.0198136	0.011049	0.0268537
Negletein 6-[rhamnosyl-(1->2)-fucoside]	0.00196414	0.00587607	0	0.000212342	0.00124101	0.000776629	0.00352911	0	0	0	0.000500509	0.0021687
Neoacrimarine B	0.0310415	0.0426668	0.0339025	0.0494044	0.0482009	0.0378149	0.0339626	0.0740086	0.0399804	0.0220633	0.0394805	0.0341069
Neocasomorphin (1-5)	0.00218814	0.00272402	0.00447254	0.00422717	0.00307383	0.00627831	0.00482769	0.0115277	0.0145744	0.00678633	0.0114296	0.0157462
Neodiospyrin	0.00814225	0.0122387	0.0112769	0.0103254	0.00875072	0.00939457	0.010091	0.00712808	0.00745934	0.00817674	0.00440553	0.00621798
Neodymium ethanedioate--water (2/3/10)	0.0104214	0.00971726	0.00970337	0.0102598	0.01033	0.0103285	0.00918583	0.00894463	0.00809192	0.00908552	0.00799241	0.00890159
Neodymium(3+) stearate	1.694	1.8308	1.78536	1.76213	1.40672	1.47506	1.4285	1.69388	1.66953	1.91307	2.10739	1.94252
Neomycin	0.00394924	0.00188014	0.0021276	0.0101179	0.00400592	0.00215003	0.00885982	0.0115361	0.00184996	0.00246849	0.00480068	0.00229693
N-Ethyl-N,N-dimethyl-2-[2-(4-octylphenoxy)ethoxy]ethan-1-aminium dodecane-1-sulfonate	0.0138531	0.0108455	0.0155678	0.0158673	0.0157811	0.014996	0.0141013	0.015739	0.0159556	0.0138993	0.0143453	0.0143077
Netilmicin	0.00752164	0.0100462	0.0151187	0.00940443	0.010447	0.010333	0.0136606	0.0117988	0.0142192	0.00974438	0.0150018	0.0175732
NeuAcalpha2-3Galbeta-Cer(d18:1/16:0)	3.3508	3.61237	3.4666	3.45022	2.74178	2.84874	2.77194	3.32004	3.2349	3.68731	4.09584	3.75755
NeuAcalpha2-3Galbeta-Cer(d18:1/18:0)	0.201378	0.22369	0.192133	0.131286	0.101933	0.116895	0.165385	0.118252	0.114757	0.0737623	0.264331	0.191579
NeuAcalpha2-3Galbeta-Cer(d18:1/20:0)	0.357026	0.473764	0.550989	0.5413	0.472599	0.425138	0.463668	0.606354	0.591295	0.475466	0.519676	0.57117
Neuromedin C, ala(1)-leu(9)-psi-(CH2NH)-leu(10)-	0.019949	0.0192963	0.00605342	0.0130677	0.0150111	0.0158678	0.00935054	0.0106823	0.00559692	0.0216097	0.0105313	0.0170409
Neuromedin N	0.0791476	0.0738959	0.0700183	0.0712121	0.049848	0.0605459	0.057565	0.052165	0.051367	0.0422947	0.0366895	0.0517984
N-Heptanoylglycine	0.0130305	0.00519342	0.00705177	0.00428816	0.0062618	0.0128126	0.00864076	0.0088658	0.00320106	0.00359399	0.00707465	0.0106278
N-hexacosanoylglycine	0	0.000991928	0.00271829	0.0022836	0.00283497	0.00207968	0.00246715	0.00313047	0.00212493	0.00204482	0.00237718	0.00273045
N-Hexacosyl-27-hydroxyoctacosanamide	0.0105836	0.00950076	0.00952339	0.00918265	0.00993885	0.00967624	0.00914376	0.00778563	0.0111617	0.00929805	0.00994947	0.00961434
N-Hexadecanoylpyrrolidine	0	0.00072315	0.00928435	0.00513074	0.0094181	0.0951327	0.010097	0.0357936	0.00637472	0.0120369	0.00680625	0.00280133
N-Hexadecyl diethanolamine	0.0215931	0.0180838	0.023438	0.0197495	0.0390968	0.0238781	0.0286618	0.0416913	0.0429966	0.0385945	0.0308295	0.0322358
N-Hydroxy-1-aminonaphthalene	0.0867413	0.136384	0.126486	0.169664	0.192842	0.151397	0.161125	0.193053	0.13392	0.134015	0.106631	0.113517
Nicotinic acid mononucleotide	0.0132448	0.0408892	0.0379193	0.023226	0.0126497	0.0126557	0.0202373	0.0480206	0.0130069	0.00234139	0.011282	0.0195123
Nicotinic acid, potassium salt	0.0618655	0.0711213	0.057299	0.058594	0.0594883	0.060472	0.0443988	0.0683559	0.052875	0.0537456	0.0434322	0.0550465
Nitric acid--3,6,10,13,16,20,23-heptaoxapentacosane-1,8,18,25-tetrol (4/1)	0.00297773	0.000828145	0.00113428	0.00122813	0.00103103	0.00171941	0.00344491	0.000922277	0.000567549	0.000510815	0.0028904	0.000549432
Nitrogen dioxide	0.0135152	0.0137089	0.0143292	0.0137372	0.0144904	0.0145752	0.0099472	0.0188746	0.0110694	0.0117565	0.0109184	0.0134688
N-Methoxyspirobrassinol	0.011594	0.0124906	0.0115227	0.00954657	0.00751721	0.00898874	0.0109304	0.0201872	0.02871	0.010638	0.0268565	0.0177762
N-methyl Leukotriene C4	0.00406199	0.00380438	0.00735502	0.00584746	0.000904342	0.00183534	0.00215168	0.00296562	0.00369625	0.00640838	0.00556809	0.00455842
N-Methyl-1-deoxynojirimycin	0.00571725	0.00798255	0.00794266	0.0102928	0.0114205	0.00857792	0.010389	0.0126085	0.00861699	0.00818141	0.00666418	0.0069344
N-Methylcalystegine C1	0.0436068	0.0433503	0.030614	0.0315958	0.0529977	0.0560814	0.0411256	0.0379851	0.0416716	0.036035	0.0363331	0.0495252
N-Methylene-ethenamine	0.00716914	0.0107533	0.0105555	0.00784882	0.00554849	0.00429508	0.00821186	0.0068568	0.00914727	0.0138308	0.00693578	0.0077925
N-Methylglycyl-N~5~-(diaminomethylidene)ornithylvalyltyrosylisoleucylhistidylprolylisoleucine	0.012782	0.01445	0.0149086	0.0113971	0.0288981	0.0240975	0.00992298	0.0284779	0.0160484	0.0117954	0.00927512	0.017368
N-Methyl-N-palmitoyltaurine	0.00690276	0.00733688	0.00698716	0.00842346	0.00893181	0.00899353	0.0101029	0.0134607	0.0142969	0.0150371	0.0156545	0.0175816
N-Nitroethylenediamine	0.0356848	0.0212474	0.0190368	0.0159312	0.0286835	0.0680047	0.0194932	0.0567063	0.0458176	0.0695819	0.0426576	0.0393725
N-nitrosomethanamine	0.0114308	0.00718669	0.00804959	0.00560318	0.00663743	0.00772176	0.00685946	0.00568605	0.00629935	0.0115432	0.00510217	0.00750947
N-Nitroso-pyrrolidine	0.0506107	0.0589879	0.0432688	0.0500668	0.0366995	0.0531159	0.0194167	0.0330896	0.0440048	0.0220734	0.0346921	0.0360838
N-Oleoylethanolamine	0.000324139	0.00262215	0.00226834	0.00264175	0.00329993	0.00282631	0.00241257	0.00315616	0.00268752	0.00323242	0.00313899	0.0042659
N-Oleyl diethanolamide	0.00151037	0.000715609	0.00123338	0.000825192	0.00248677	0.00205338	0.00141187	0.00154525	0.00238746	0.0019495	0.00155804	0.0015968
N-Ornithyl-L-taurine	0.00223956	0.00188526	0.00233623	0.00291474	0.00333883	0.00284575	0.00264202	0.0040083	0.00267184	0.00310078	0.00315437	0.00283509
Notoginsenoside I	0.00442684	0.00489958	0.00440307	0.00335727	0.0014434	0.00296957	0.00272221	0.00323964	0.00474465	0.00605443	0.00573187	0.0062713
Notoginsenoside K	0.0104349	0.0107192	0.0230803	0.020891	0.0131119	0.0132288	0.0221883	0.0178091	0.0143619	0.0166204	0.01665	0.016124
Notoginsenoside R10	0.0794821	0.0619389	0.0500447	0.0549968	0.0427821	0.0412386	0.056512	0.05076	0.0327062	0.0258117	0.0278944	0.0387388
N-Phenylretinamide	0.224238	0.251562	0.253451	0.283672	0.303428	0.317467	0.344188	0.474954	0.537217	0.555335	0.571913	0.638395
NSC 341077	0.0351103	0.029649	0.0110582	0.0212004	0.0201695	0.0155239	0.0240751	0.0116389	0.0154348	0.022047	0.0182648	0.0291222
NSC144112	0.0140734	0.0175078	0.00426366	0.00646718	0.0105525	0.00783014	0.0134689	0.00805363	0.00528793	0.00312019	0.00356822	0.00780657
NSC262186	0.0144462	0.0159517	0.00986383	0.0124811	0.0135494	0.0114335	0.0128601	0.00963205	0.0094701	0.0103156	0.0103157	0.0153585
NSC277995	0.0291622	0.0392412	0.0324398	0.0354368	0.0346236	0.0315495	0.0293398	0.0401539	0.0358279	0.037172	0.0182129	0.0292565
NSC324000	0.0379968	0.0499407	0.0373828	0.0415176	0.0324905	0.0493084	0.0372797	0.0311517	0.0374658	0.0237522	0.0250405	0.0347532
NSC328419	0.428497	0.588864	0.681578	0.508661	0.216233	0.313352	0.322123	0.452775	0.58342	0.654828	0.463665	0.547753
NSC346487	0.00357442	0.00438149	0.00359727	0.00429362	0.00454909	0.00460937	0.00437669	0.00398205	0.00441323	0.00433429	0.00399999	0.00466087
NSC44330	0.501582	0.514512	0.50949	0.492761	0.486804	0.484603	0.474181	0.514737	0.51967	0.536439	0.546147	0.540188
NSC625439	0.1412	0.166472	0.145879	0.149057	0.135324	0.130719	0.142151	0.16955	0.217228	0.160388	0.191117	0.221497
NSC65841	0.00107213	0.00259406	0.00437079	0.00410833	0.00198432	0.00178344	0.00256015	0.0053663	0.00609164	0.00247811	0.00410918	0.00486399
NSC94006	0.0300254	0.0268935	0.029498	0.0283745	0.035109	0.0362577	0.03692	0.0249299	0.0281518	0.0243683	0.0301299	0.0281711
N-stearoyl valine	0.0147181	0.0151027	0.0242644	0.0254232	0.0270548	0.0212794	0.0261787	0.0302431	0.0246355	0.0242981	0.0254103	0.0302798
N-trans-Feruloyloctopamine	0.0363455	0.0214528	0.0162027	0.0109547	0.0336657	0.0405321	0.0420181	0.0455498	0.0256695	0.0160621	0.0164582	0.025268
N-Undecanoylglycine	0.00297669	0.00590677	0.00351948	0.00813309	0.0071525	0.00957387	0.00793722	0.00566639	0.00482731	0.00942778	0.00501568	0.00460797
Octacyclo[44.3.1.1~4,8~.1~11,15~.1~18,22~.1~25,29~.1~32,36~.1~39,43~]hexapentaconta-1(50),4(56),5,7,11(55),12,14,18(54),19,21,25(53),26,28,32(52),33,35,39(51),40,42,46,48-henicosaene	0.00585784	0.00227913	0.00588898	0.00593704	0.0052256	0.0060205	0.00686801	0.00362565	0.00216036	0.00285096	0.00800619	0.00646129
Octadecanamide	0	0.00636686	0.00305161	0.00281577	0.00727674	0.00815735	0.00327198	0.00519542	0.00437751	0.00266154	0.00642653	0.00689015
Octadecanedioic acid	0.014068	0.0322622	0.0445365	0.0300659	0.0153044	0.0256662	0.0454884	0.0448147	0.0208186	0.0305738	0.0398796	0.0323129
Octadecanoic acid, 2-[2-[2-(2-hydroxyethoxy)ethoxy]ethoxy]ethyl ester	0.0384907	0.0456083	0.0485613	0.0404398	0.0301974	0.0308722	0.0290752	0.0411532	0.0371137	0.0491828	0.0402202	0.0434199
Octadecanoic acid, compd. with 2-amino-2-methyl-1-propanol (1:1)	0.00902958	0.00768437	0.0087166	0.00841913	0.0155536	0.0102149	0.010742	0.0112634	0.0150942	0.0156905	0.0123791	0.0118507
Octadecanoic acid, compd. with 2-aminoethanol (1:1)	0.010592	0.00756699	0.00696727	0.0102616	0.0109176	0.0121424	0.00928956	0.0102837	0.00943643	0.0113118	0.0158659	0.0121774
Octadecyl fumarate	0.00377833	0.0031481	0.00896069	0.00868115	0.0110304	0.00547019	0.0100434	0.0146011	0.00648293	0.00688325	0.0094549	0.0134364
Octaethylene glycol	0.000614485	0.00102491	0.00240789	0.00100697	0.00120577	0.00123979	0.00118233	0.00114398	0.00167084	0.000918824	0.0020429	0.00158022
Octakis(hexadecylsulfanyl)naphthalene	0.00735467	0.00890494	0.0107996	0.00768412	0.0205164	0.0178222	0.00586995	0.0207075	0.0102467	0.00861058	0.00572774	0.0139799
Octanal	0.00185045	0.00180142	0.00165549	0.00242506	0.0016137	0.00135583	0.00183557	0.00153276	0.00161739	0.00133584	0.00152705	0.00197607
Octyl gallate	0.0225865	0.0170884	0.025272	0.0238004	0.015213	0.0284133	0.0189809	0.0412586	0.0223038	0.0167664	0.0250329	0.03014
Octylamine	0.0213237	0.199847	0.0253486	0.255444	0.240769	0.211476	0.204959	0.17927	0.176011	0.186981	0.185752	0.183431
O-Desmethylvenlafaxine glucuronide	0.0169342	0.00466512	0.0176306	0.0161489	0.0138094	0.0122301	0.00395717	0.022003	0.00465909	0.00675246	0.00436425	0.00298961
Oleamide	0.00914898	0.00165545	0.0366184	0.0375082	0.175383	0.118618	0.0734597	0.0878541	0.0376036	0.042635	0.137764	0.0649556
Oleic acid	0.00356608	0.00323601	0.00645262	0.00464989	0.00514284	0.00583592	0.00587072	0.00750007	0.00548969	0.00682001	0.00616965	0.00696488
Oleoylcarnitine	0.0468182	0.0349083	0.0439301	0.0481739	0.0535645	0.0756504	0.0606577	0.172842	0.098952	0.122213	0.0959694	0.102119
Olitoriusin	0	0.000606943	0.00108062	0.00105181	0.00132589	0.00122408	0.00195309	0.00220114	0.00164966	0.00172354	0.0013657	0.00182859
Olmesartan	0.0151741	0.0153627	0.0144389	0.0150942	0.0145999	0.0141065	0.0135592	0.0121785	0.0146023	0.013516	0.0137161	0.0165483
OM-174	0.0253242	0.0278084	0.0182048	0.0194624	0.0102919	0.0174543	0.012356	0.0182945	0.02941	0.0180258	0.0268232	0.0336799
O-Methylganoderic acid O	0.0711201	0.0603808	0.078057	0.0441026	0.0474251	0.0749515	0.073692	0.0852816	0.0511487	0.0663301	0.0454411	0.0529074
O-O-Dibenzyl-(-)-actinonin	12.7138	12.9444	12.6414	14.2136	13.4394	13.1597	19.7437	14.0729	15.3744	15.5898	16.6	15.69
Ophiopogonin C'	0	0.00193606	0.00361836	0.00193111	0.00239259	0.00241088	0.00466747	0.00556595	0.0029524	0.00358671	0.0031114	0.00474002
Orlistat	0.0043479	0.00475912	0.00545978	0.00596461	0.00549142	0.00615708	0.00647236	0.00723268	0.00804616	0.0087494	0.00884399	0.00906405
Ornithine	0.0276592	0.0345194	0.0357492	0.0270161	0.0172232	0.0171318	0.0247459	0.0234939	0.0300994	0.042319	0.0242757	0.0267566
Osmundalactone	0.0501242	0.054473	0.0538119	0.0519912	0.0580948	0.0568546	0.03885	0.0721057	0.0450159	0.0470611	0.0444999	0.0557888
O-tert-Butyl-L-tyrosylglycylglycyl-L-phenylalanyl-L-leucine	0.0418681	0.0411107	0.0387931	0.0563349	0.0394748	0.0403553	0.0410639	0.0398484	0.0444009	0.0363171	0.0401031	0.0427237
Oxalosuccinic acid	0.0388161	0.0105976	0.00549798	0.0158373	0.011047	0.033073	0.0284221	0.0119393	0.00498536	0.00592177	0.00425202	0.0153198
Oxamniquine	0.01725	0.0194188	0.0184791	0.0205767	0.0210795	0.0220681	0.0221148	0.019906	0.0227191	0.0215679	0.021685	0.0217998
Oxidized glutathione	0.0034015	0.00471651	0.00395651	0.0125885	0.00258963	0.00290036	0.0025491	0.00667175	0.00468004	0.00211361	0.00314673	0.0054792
Oxoglaucine	0.00233613	0.000689302	0.00105272	0.000809914	0.000698441	0.00178385	0.00340295	0.00097279	0.000323705	0.000129008	0.002734	0.000294999
P,P-Dioctyldiphenylamine	0.00508095	0.00775751	0.0142222	0.0147067	0.0141746	0.010453	0.0127784	0.0146672	0.0121535	0.0126653	0.0122032	0.0132057
PA(10:0/19:0)	0.0127256	0.0828467	0.0197665	0.0326902	0.0374904	0.01342	0.0154422	0.0555481	0.0587236	0.0219637	0.0090769	0.0116277
PA(14:0/20:4(5Z,8Z,11Z,14Z))	0.000652973	0.00515375	0.00116849	0.0074499	0.00798312	0.00656693	0.00711984	0.00747316	0.00945909	0.0111002	0.010787	0.0118004
PA(14:0/24:1(15Z))	0.00136734	0.00123179	0.00141217	0.00165836	0.00162908	0.00219727	0.00208001	0.00340002	0.00435922	0.00432883	0.00454539	0.00478656
PA(14:1(9Z)/24:1(15Z))	0.00693353	0.00973143	0.00709207	0.00706931	0.00840283	0.00695567	0.0083346	0.00685746	0.0067418	0.00756709	0.00795112	0.00687821
PA(15:/14:1(9Z))	0.00321799	0.00187338	0.00875828	0.00896788	0.011155	0.00868103	0.012446	0.0138614	0.0130723	0.0135884	0.0156973	0.0174268
PA(15:/2:2(11Z,14Z))	0.293611	0.44876	0.266222	0.27868	0.254673	0.165342	0.151231	0.217502	0.163679	0.174382	0.151734	0.0988483
PA(15:0/18:0)	0.000273436	0.0031726	0.000236966	0.00412046	0.00365008	0.00383202	0.00416438	0.00355477	0.00429994	0.00576161	0.00566317	0.00592196
PA(15:0/18:3(6Z,9Z,12Z))	0	0.000850151	0.00196747	0.00290104	0.00278046	0.00121242	0.00247355	0.00410146	0.00141472	0.00216737	0.00243884	0.00272598
PA(15:0/18:4(6Z,9Z,12Z,15Z))	0.0367883	0.0402218	0.0453916	0.052659	0.0362692	0.0440885	0.0517976	0.0479684	0.0498332	0.0633891	0.0413389	0.0354548
PA(15:0/22:2(13Z,16Z))	0.0019383	0.00279194	0.00258821	0.00260921	0.00264547	0.00225881	0.00225425	0.0023794	0.00248264	0.00245903	0.0023794	0.00246287
PA(16:0/24:1(15Z))	0.0565984	0.062202	0.0570652	0.0846201	0.104058	0.0649903	0.162462	0.168564	0.0641534	0.141963	0.110763	0.132621
PA(16:1(9Z)/15:0)	0.00653806	0.00605225	0.00772342	0.00691162	0.0076402	0.00661333	0.00816423	0.0080388	0.00679047	0.00727277	0.00686202	0.00780377
PA(16:1(9Z)/22:6(4Z,7Z,10Z,13Z,16Z,19Z))	0.0120662	0.0145607	0.00913049	0.00487436	0.00739056	0.00896957	0.0103496	0.00764259	0.00538986	0.00620221	0.0013495	0.00890993
PA(17:0/22:4(7Z,10Z,13Z,16Z))	0.00165218	0.00238265	0.0108924	0.0101281	0.00829708	0.0154809	0.0107601	0.0109705	0.00535821	0.00460271	0.00437488	0.0214145
PA(17:2(9Z,12Z)/22:6(4Z,7Z,10Z,13Z,16Z,19Z))	0.0347208	0.0313466	0.0836018	0.0338595	0.00746615	0.0323041	0.0466214	0.0421976	0.00803038	0.0175294	0.0164754	0.0313568
PA(18:/18:2(9Z,12Z))	0.00522875	0.0199066	0.00499174	0.0243295	0.0235349	0.0209657	0.0223709	0.0205001	0.0223738	0.0440353	0.043084	0.0441079
PA(18:0/18:2(9Z,12Z))	0.0213081	0.0252473	0.0175093	0.0179876	0.0139614	0.0104008	0.00984761	0.0119732	0.00724374	0.00791487	0.00759682	0.00614972
PA(18:1(11Z)/22:6(4Z,7Z,10Z,13Z,16Z,19Z))	0.0163338	0.0173593	0.0141627	0.0130052	0.009731	0.00775546	0.00686572	0.00786782	0.00539697	0.00620208	0.00575014	0.00312604
PA(18:1(9Z)/22:4(7Z,1Z,13Z,16Z))	0.00890704	0.011354	0.00999865	0.0118225	0.0139662	0.0153919	0.0165065	0.0298161	0.0350645	0.0377615	0.0400308	0.0441975
PA(18:2(9Z,12Z)/24:1(15Z))	1.31632	0.0113726	0.0471489	0.0529012	0.0415739	0.045095	0.0287377	0.0361754	0.0640422	0.0525243	0.047954	0.0375716
PA(18:3(6Z,9Z,12Z)/24:1(15Z))	0.0115818	0	0.00540274	0.00563281	0.00641713	0.00833515	0.0171559	0.0125925	0.0168609	0.00651461	0.0100522	0.0108296
PA(19:0/22:4(7Z,10Z,13Z,16Z))	0.00619593	0.00587009	0.0066575	0.011852	0.00815384	0.00842226	0.00511128	0.00788409	0.00282386	0.00758522	0.00516	0.00354176
PA(20:4(5Z,8Z,11Z,14Z)/24:1(15Z))	0.395966	0.0309798	0.27947	0.289515	0.192501	0.608446	0.139538	0.147917	0.638928	0.394248	0.315961	0.11993
PA(21:0/22:1(11Z))	0.000920639	0.00212239	0.00341211	0.04014	0.00597528	0.00200092	0.00458378	0.00132372	0	0.00151236	0.00135395	0.0112888
PA(22:1(13Z)/19:2(10Z,13Z))	0.00138757	0.00138996	0.00296754	0.00196169	0.00240633	0.00388321	0.00311393	0.00516134	0.00620011	0.00255128	0.00258081	0.00355525
PA(22:4(7Z,10Z,13Z,16Z)/24:1(15Z))	0.0297728	0.0124304	0.00717422	0.0246905	0.0321192	0.0222804	0.069166	0.0096311	0.0102635	0.0637953	0.0731822	0.0337348
PA(22:5(4Z,7Z,10Z,13Z,16Z)/24:1(15Z))	0.14028	0.00564455	0.0242658	0.0233591	0.0117503	0.125905	0.0125441	0.00726756	0.126743	0.0523284	0.0220993	0.00421765
PA(22:6(4Z,7Z,10Z,13Z,16Z,19Z)/24:1(15Z))	0.0911947	0.15339	0.173588	0.127555	0.0315559	0.0694566	0.123719	0.133631	0.0602367	0.0464825	0.0251509	0.0425082
PA(P-16:0/18:2(9Z,12Z))	0.000220087	0.00190647	0.000225489	0.00313941	0.00292077	0.00276628	0.00278295	0.00293142	0.00381753	0.00405245	0.00465707	0.00470917
Palmitic acid	0.00815521	0.00630687	0.0157327	0.00685421	0.00242771	0.0071564	0.00708132	0.0132508	0.00466535	0.0109352	0.00883977	0.00814795
Palmitic amide	0.00127822	0.000863784	0.00563235	0.00557292	0.021599	0.0165193	0.00935231	0.0111212	0.00538754	0.00651616	0.0160001	0.00756813
Palmitoleamide	0.00364936	0.00372724	0.00417129	0.00356307	0.00370583	0.00360315	0.00352363	0.00327996	0.00377356	0.00338012	0.00375924	0.0037426
Palmitoyl glucuronide	0.00750037	0.00780854	0.00789725	0.00906703	0.00918826	0.00985583	0.0112088	0.0125905	0.0145975	0.0161499	0.0171567	0.0157037
Panaxydol linoleate	0.00896248	0.00860656	0.0108204	0.0115745	0.0122987	0.00967534	0.0110603	0.0112349	0.0100154	0.0107972	0.0106006	0.01089
Pandamarilactam 3x	0.013917	0.0145197	0.0150362	0.0147862	0.0119385	0.013009	0.0108807	0.0125731	0.0158806	0.0156996	0.0201364	0.0149776
Pantothenic acid	0.00859272	0.0121316	0.00881048	0.0113267	0.0122758	0.0101433	0.00941301	0.0100699	0.0130066	0.0170031	0.0111808	0.0110285
Paracetamol sulfate	0.00195604	0.00258186	0.00165975	0.00307031	0.00222492	0.00199773	0.00233578	0.00108609	0.00158669	0.000936022	0.00103428	0.00144989
PAT16(22:1(2E)(2Me,4Me[S],6Me[S])/22:1(2E)(2Me,4Me[S],6Me[S])/22:1(2E)(2Me,4Me[S],6Me[S])/24:0(2Me[S],3OH[S],4Me[S],6Me[S]))	0.0245408	0.0390656	0.0356354	0.054186	0.0333621	0.0282263	0.0242755	0.0358788	0.0388403	0.0379949	0.0314365	0.0212297
Patulin	0.0203608	0.0103535	0.00937506	0.0170528	0.0122577	0.0149054	0.0340482	0.0117612	0.01044	0.0254263	0.00788394	0.00729174
Paxilline	0.0225308	0.00688468	0.00626887	0.00674925	0.00213781	0.0072631	0.0112001	0.00436721	0.00609837	0.0146805	0.013926	0.0144072
PC(11:1(10E)/11:1(10E))[U]	0.00780408	0.00579849	0.00735727	0.0075633	0.00353828	0.00369436	0.0065616	0.00615669	0.00460533	0.00299765	0.00423673	0.00548618
PC(14:0/15:0)	0.000404747	0.00151279	0.000362613	0.00140679	0.00190576	0.00162274	0.00161851	0.00183525	0.00216492	0.00343944	0.00276896	0.00323454
PC(14:0/18:1(11Z))	0.0102091	0.00420351	0.0078408	0.00598584	0.00804879	0.00705069	0.00408957	0.00439148	0.00514764	0.00931751	0.00663998	0.00743113
PC(14:0/20:4(5Z,8Z,11Z,14Z))	0.000875951	0.00136659	0.00118245	0.00136636	0.00154472	0.00154392	0.00211461	0.00319746	0.00357681	0.00390073	0.00381114	0.00448072
PC(14:0/22:5(4Z,7Z,10Z,13Z,16Z))	0.14037	0.134911	0.137231	0.200485	0.241123	0.15832	0.382356	0.402359	0.154382	0.331789	0.265424	0.314805
PC(14:0/22:6(4Z,7Z,10Z,13Z,16Z,19Z))	0.0624426	0.00678167	0.0497778	0.0458174	0.0476284	0.0790731	0.027598	0.062836	0.0898221	0.0364495	0.0328978	0.058432
PC(14:0/24:1(15Z))	0.0028868	0.00317755	0.00450571	0.00536166	0.0155696	0.00669613	0.00646692	0.0042283	0.00445126	0.00569182	0.00650996	0.00646588
PC(14:0/P-18:1(11Z))	0.00993234	0.00952106	0.0150415	0.0144664	0.0156661	0.012572	0.014837	0.0145857	0.0129381	0.0135437	0.0128422	0.0140447
PC(14:1(9Z)/P-16:0)	0.00950681	0.00782753	0.010163	0.00963241	0.0102997	0.00971705	0.00957569	0.00939455	0.00994754	0.00896788	0.00916051	0.00947145
PC(15:0/18:1(11Z))	0.0125416	0.0160676	0.0169111	0.0152447	0.0193508	0.0159511	0.0217137	0.0173082	0.0174084	0.0206145	0.0160216	0.0149673
PC(16:0/22:5(4Z,7Z,10Z,13Z,16Z))	0.293531	0.137373	0.761171	0.141833	0.21857	0.284255	0.25059	0.0616973	0.169806	0.154919	0.490222	0.544378
PC(16:0/22:6(4Z,7Z,10Z,13Z,16Z,19Z))	0.728577	0.0932568	0.234704	0.266171	0.230346	0.648108	0.244373	0.168582	0.745489	0.449639	0.269207	0.119218
PC(16:0/P-18:1(11Z))	0	0.00602434	0.00786592	0.0043928	0.00838196	0.00480462	0.00775651	0.00308723	0.00443667	0.00802131	0.00623076	0.00484738
PC(16:1(9Z)/22:6(4Z,7Z,10Z,13Z,16Z,19Z))	0.242862	0.0501041	0.139286	0.141737	0.0831217	0.161498	0.0870911	0.0474447	0.239101	0.241226	0.13549	0.044191
PC(18:0/22:5(4Z,7Z,10Z,13Z,16Z))	0.0106491	0.0239524	0.00516389	0.00657611	0.0105993	0.00691671	0.0191145	0.00493428	0.00479694	0.020635	0.0230407	0.0103855
PC(18:0/P-18:1(11Z))	0.00400538	0.00501245	0.00469737	0.00700772	0.0143075	0.0071504	0.00659652	0.00505955	0.00498119	0.00599951	0.00766143	0.00911722
PC(18:1(11Z)/22:6(4Z,7Z,10Z,13Z,16Z,19Z))	0.0437174	0.0539034	0.0284739	0.0480093	0.0514359	0.04256	0.211141	0.0249727	0.036984	0.31859	0.197869	0.0292004
PC(18:3(6Z,9Z,12Z)/20:5(5Z,8Z,11Z,14Z,17Z))	0.0163953	0.001888	0.0176572	0.016185	0.0194803	0.0244594	0.0101878	0.033542	0.0289348	0.0120757	0.0164457	0.0258979
PC(18:4(6Z,9Z,12Z,15Z)/16:1(9Z))	0.00492704	0.00522997	0.00448862	0.00583004	0.00667279	0.00738896	0.00773464	0.0128448	0.016694	0.0174192	0.0182159	0.019804
PC(18:4(6Z,9Z,12Z,15Z)/P-16:0)	0.00777577	0.00615566	0.0271171	0.024775	0.0215002	0.0394934	0.0296988	0.0297637	0.0173803	0.0239776	0.0235717	0.0516685
PC(2:3(5Z,8Z,11Z)/22:6(4Z,7Z,1Z,13Z,16Z,19Z))	0.00491574	0.00746094	0.00710246	0.0178029	0.0234574	0.0146848	0.0173708	0.0201989	0.0167575	0.0182761	0.0296331	0.0251163
PC(20:4(5Z,8Z,11Z,14Z)/22:6(4Z,7Z,10Z,13Z,16Z,19Z))	0.291344	0.0127265	0.0452274	0.0450313	0.0196666	0.250207	0.0226195	0.0128241	0.252759	0.0998359	0.0419679	0.00945985
PC(20:5(5Z,8Z,11Z,14Z,17Z)/P-18:1(11Z))	0.00984343	0.0363301	0.0103599	0.0114356	0.0135053	0.010194	0.0302216	0.0102286	0.0133817	0.0339884	0.0151015	0.0117872
PC(22:1(13Z)/24:1(15Z))	0.000854682	0.00124963	0.00179123	0.00232344	0.00542434	0.00300568	0.00267784	0.0022491	0.0022178	0.0025288	0.00320527	0.00283098
PC(22:4(7Z,10Z,13Z,16Z)/P-18:1(11Z))	0.00168985	0.00164744	0.00152676	0.00180553	0.00193931	0.0017846	0.0015102	0.00180638	0.00198353	0.00177605	0.00175426	0.00176937
PC(22:6(4Z,7Z,10Z,13Z,16Z,19Z)/22:6(4Z,7Z,10Z,13Z,16Z,19Z))	0.00022145	0.00334125	0.0158764	0.00891312	0.0174734	0.00555898	0.0066071	0.00502617	0.00142537	0.00252299	0.011289	0.0135927
PC(24:0/24:1(15Z))	0.00206509	0.0019029	0.00201003	0.00229135	0.00221533	0.00204707	0.0021842	0.00212321	0.0022601	0.00235508	0.00226651	0.0025597
PC(24:0/26:0)[U]	0.00827337	0.00730835	0.00798456	0.00773713	0.00857639	0.00775811	0.00762096	0.00688871	0.0080378	0.00732511	0.00743056	0.00820048
PC(24:1(15Z)/24:1(15Z))	0.00149233	0.00162719	0.00164642	0.00138216	0.00154812	0.00120318	0.00123676	0.00165613	0.00120636	0.00126161	0.00143455	0.00127336
PC(DiMe(11,3)/MonoMe(11,3))	0.00494615	0.00606026	0.00795027	0.00619865	0.0023136	0.00323755	0.00627724	0.00841768	0.00387677	0.00630429	0.00467604	0.00592322
PC(O-12:0/O-1:0)	0.00436167	0.00412725	0.00603088	0.00395921	0.00194189	0.00238393	0.00225765	0.00394321	0.00374528	0.00425617	0.00390616	0.00362551
PC(O-15:0/O-1:0)[U]	0.152121	0.185323	0.197649	0.162516	0.119132	0.126761	0.115394	0.162352	0.145392	0.191916	0.163442	0.176439
PC(O-18:0/24:0)	0.00563395	0.00414741	0.00742697	0.00282347	0.00836235	0.00313176	0.00605553	0.0164649	0.00828071	0.00918456	0.000788734	0.00276607
PC(P-15:0/0:0)	0.0434204	0.0549444	0.0466299	0.0192917	0.0285382	0.0159358	0.0155718	0.0286634	0.052444	0.0383135	0.0246593	0.0184538
PC(P-17:0/0:0)	0.01604	0.0163374	0.0135713	0.013271	0.00990164	0.0104747	0.0109738	0.0124325	0.0103722	0.00911861	0.00664385	0.0105596
p-Coumaroyl vitisin A	0.00350826	0.00210614	0.00341174	0.00263097	0.00223049	0.00387637	0.00818326	0.00413279	0.00178076	0.0012822	0.00800925	0.00330428
p-Cresol	0.115409	0.0356787	0.0168539	0.0478954	0.0341248	0.0908422	0.0861057	0.0334972	0.0188762	0.0201433	0.0170266	0.0377688
p-Cresol glucuronide	0.157413	0.0596263	0.0205607	0.0685969	0.0695371	0.113525	0.166845	0.0663024	0.0280555	0.0175308	0.0210632	0.0699438
p-Cresol sulfate	0.913517	0.235419	0.0932184	0.32224	0.239145	0.681612	0.6511	0.230155	0.121816	0.11428	0.093365	0.272704
PE(12:0/18:3(6Z,9Z,12Z))	0.0127349	0.0164755	0.0167462	0.0180848	0.013996	0.0232554	0.013927	0.0231732	0.0181374	0.0276112	0.0258168	0.0138779
PE(12:0/18:4(6Z,9Z,12Z,15Z))	0.0146686	0.0152458	0.0177792	0.0215088	0.0158314	0.0181722	0.0193345	0.0216608	0.0199821	0.023887	0.0174425	0.0130932
PE(14:/18:2(9Z,12Z))	0.00203936	0.0096293	0.0017346	0.0112005	0.0116154	0.00972198	0.0102115	0.0107184	0.0118205	0.0223625	0.0225683	0.0227328
PE(14:0/14:1(9Z))	0.00131762	0.00182074	0.0020322	0.00324962	0.0115853	0.00575834	0.00378453	0.00302716	0.00369266	0.00447807	0.00574395	0.00531068
PE(14:0/18:2(9Z,12Z))	0.064956	0.098083	0.0617622	0.0612534	0.0587837	0.0396701	0.0347608	0.0516226	0.0381807	0.0418164	0.0374174	0.02434
PE(14:0/20:3(5Z,8Z,11Z))	0.00099548	0.00308687	0.00079981	0.0033728	0.00342423	0.00265718	0.00291246	0.00281989	0.00317954	0.00581368	0.00649111	0.00613896
PE(14:0/22:6(4Z,7Z,10Z,13Z,16Z,19Z))	0.0149074	0.0103713	0.0158221	0.00986457	0.0100254	0.0120308	0.0137573	0.0118748	0.0112162	0.0105724	0.0145383	0.0133353
PE(14:0/P-18:0)	0.0214005	0.0181361	0.0207575	0.0152042	0.0183967	0.0185431	0.019082	0.0176896	0.0168796	0.016412	0.0186806	0.0177782
PE(14:1(9Z)/15:0)	0.0976965	0.0749432	0.0703099	0.051023	0.0687238	0.0949995	0.0712974	0.111132	0.0488318	0.0647684	0.0413422	0.0456798
PE(14:1(9Z)/2:5(5Z,8Z,11Z,14Z,17Z))	0.00158979	0.00614825	0.00155043	0.00773219	0.00864785	0.0080385	0.00829905	0.0100156	0.00921155	0.0187408	0.0144939	0.0167737
PE(14:1(9Z)/20:5(5Z,8Z,11Z,14Z,17Z))	0.0110613	0.0108345	0.00788455	0.00839262	0.00591451	0.00563316	0.00563226	0.00374793	0.00202848	0.00324346	0.00342782	0.00374269
PE(14:1(9Z)/P-16:)	0.00111251	0.00555776	0.000830136	0.00596239	0.00668306	0.00584412	0.00643392	0.00591976	0.00666758	0.0134367	0.0130131	0.0116589
PE(15:0/16:0)	0.0390506	0.0328901	0.0341712	0.0303945	0.0325488	0.0346385	0.0343232	0.0311109	0.0317377	0.0296132	0.0344867	0.0321861
PE(15:0/18:3(6Z,9Z,12Z))	0.0543	0.063721	0.0418337	0.0463909	0.032004	0.0273414	0.0233146	0.0270062	0.0211349	0.0218366	0.0207005	0.016132
PE(16:0/18:1(9Z))-15-isoLG hydroxylactam	0.010757	0.0235131	0.0108298	0.0111512	0.00405763	0.0038819	0.00786962	0.00546624	0.00889896	0.00164811	0.00101921	0.00357412
PE(16:0/18:1(9Z))-15-isoLG lactam	0.0313754	0.0515351	0.0758353	0.0559471	0.0299767	0.0290161	0.0362676	0.0656731	0.0701882	0.0487956	0.067394	0.0694187
PE(16:0/P-18:1(11Z))	0.0131226	0.0156305	0.0243879	0.0231723	0.0230369	0.0205505	0.0218046	0.024039	0.023686	0.0206602	0.0210573	0.0225713
PE(18:0/18:1(9Z))	0.100438	0.0178272	0.264686	0.0451396	0.0757066	0.170456	0.00900352	0.195932	0.261798	0.258851	0.147525	0.033882
PE(18:2(9Z,12Z)/24:1(15Z))	0.00175752	0.00168575	0.00180707	0.0016219	0.00154729	0.0017307	0.00159889	0.00183038	0.00162984	0.00181888	0.00174744	0.00154331
PE(18:3(6Z,9Z,12Z)/P-16:0)	0.0116323	0.00889478	0.0106463	0.00906695	0.00805878	0.0110944	0.0110684	0.0113164	0.0102911	0.0110693	0.0122419	0.0109148
PE(18:3(9Z,12Z,15Z)/14:)	0.0215037	0.109896	0.020601	0.129265	0.137029	0.115194	0.122642	0.134445	0.133681	0.286639	0.289585	0.2897
PE(18:3(9Z,12Z,15Z)/15:)	0.00673058	0.0265533	0.00639767	0.0312646	0.0353727	0.0305391	0.0321303	0.0361183	0.0345887	0.0640238	0.0627495	0.0636434
PE(18:4(6Z,9Z,12Z,15Z)/20:5(5Z,8Z,11Z,14Z,17Z))	0.00491726	0.00384516	0.00448582	0.00284614	0.00391849	0.00367097	0.00384222	0.00408947	0.00422437	0.00357418	0.00406464	0.00379569
PE(18:4(6Z,9Z,12Z,15Z)/P-16:0)	0.0159695	0.0143839	0.0162767	0.0127716	0.0137236	0.0155818	0.0146085	0.0175099	0.0107265	0.0158583	0.0165805	0.0169058
PE(22:5(4Z,7Z,10Z,13Z,16Z)/P-18:1(11Z))	0.00418894	0.00517261	0.0086831	0.00448965	0.00450063	0.00503392	0.0043684	0.00410261	0.00442375	0.00382216	0.00522153	0.00510906
PE(22:6(4Z,7Z,10Z,13Z,16Z,19Z)/24:1(15Z))	0.00591455	0.00447544	0.0088097	0.00281726	0.00877012	0.0039883	0.00623662	0.0180092	0.00942733	0.0106679	0.000642264	0.00336485
PE(22:6(4Z,7Z,10Z,13Z,16Z,19Z)/P-18:1(11Z))	0.00232982	0.00301374	0.00379687	0.00562092	0.00569288	0.00276483	0.00865871	0.0105933	0.00339227	0.0070357	0.00591223	0.00737654
PE(DiMe(11,3)/DiMe(11,5))	0.0105251	0.00816794	0.00926752	0.0148813	0.016555	0.00794654	0.0464489	0.0214405	0.00957484	0.030704	0.0205366	0.0164271
PE-Cer(d14:1(4E)/20:1(11Z))	0.00528212	0.00747167	0.0103796	0.0104907	0.011011	0.0101847	0.0102054	0.0111002	0.0113219	0.010277	0.010068	0.0110552
PE-Cer(d14:2(4E,6E)/19:0)	0.00418976	0.00352586	0.00462058	0.00432295	0.00498669	0.00452992	0.00479815	0.00452869	0.00509604	0.00407963	0.00381854	0.00472273
PEG-3 stearamine	0.0106689	0.00812167	0.0115049	0.00855181	0.0157023	0.00911089	0.00948535	0.0152216	0.0138385	0.0124266	0.0100322	0.0100785
Pelargonic acid morpholide	0.0155798	0.0131394	0.0153618	0.0189098	0.0197833	0.0495204	0.0179396	0.0298816	0.0202755	0.0346318	0.0190318	0.0163452
Pelargonidin 3-O-[b-D-Glucopyranosyl-(1->2)-[4-hydroxy-3-methoxy-(E)-cinnamoyl-(->6)]-b-D-glucopyranoside] 5-O-b-D-glucopyranoside	0.00644719	0.00474579	0.00954941	0.00420516	0.00964667	0.0031178	0.00751301	0.0182687	0.010019	0.0115068	0.00149994	0.00366709
PE-NMe(11D3/11M5)	0.00972414	0.0143038	0.0180703	0.0118173	0.00396889	0.00693201	0.0138316	0.0173771	0.00863537	0.0130973	0.00923383	0.0125088
PE-NMe(14:1(9Z)/18:4(6Z,9Z,12Z,15Z))	0.00856431	0.00846056	0.005467	0.00630424	0.00777959	0.0048459	0.00614331	0.00447703	0.0045137	0.00701737	0.0162726	0.016588
PE-NMe(20:3(8Z,11Z,14Z)/22:6(4Z,7Z,10Z,13Z,16Z,19Z))	1.95178	0.136339	0.158583	0.113608	0.0515319	1.86001	0.0901851	0.0618511	1.86879	1.21189	0.202433	0.0386962
PE-NMe(20:4(5Z,8Z,11Z,14Z)/22:6(4Z,7Z,10Z,13Z,16Z,19Z))	0.017002	0.00936033	0.0172179	0.0257957	0.0339584	0.0223919	0.0394768	0.0541926	0.0200259	0.0377302	0.0372219	0.0415984
PE-NMe(22:5(4Z,7Z,10Z,13Z,16Z)/22:5(4Z,7Z,10Z,13Z,16Z))	0.0181877	0.0151959	0.0297034	0.0118426	0.0102601	0.0173436	0.0163888	0.044548	0.0427461	0.379241	0.0786172	0.0170819
PE-NMe(22:6(4Z,7Z,10Z,13Z,16Z,19Z)/22:6(4Z,7Z,10Z,13Z,16Z,19Z))	0.00451147	0.0847833	0.0217963	0.0103676	0.0111012	0.0061861	0.0137421	0.0198095	0.00839494	0.00693379	0.0185094	0.0193034
PE-NMe2(18:0/22:5(4Z,7Z,10Z,13Z,16Z))	0.00454305	0.00372148	0.0061857	0.0643233	0.0100912	0.00508144	0.00914969	0.00241973	0.000921678	0.00341406	0.00213239	0.0231669
PE-NMe2(20:2(11Z,14Z)/22:6(4Z,7Z,10Z,13Z,16Z,19Z))	0.00260352	0.00257266	0.00277638	0.0024407	0.00328046	0.00234394	0.00237005	0.00219178	0.00284751	0.0029093	0.00284079	0.00248784
PE-NMe2(24:0/24:1(15Z))	0.00358974	0.00316637	0.00337281	0.00341787	0.00313933	0.00281061	0.00309421	0.00352066	0.00349022	0.00314846	0.00329856	0.00315478
Pentadecanoylcarnitine	0.00182514	0.00205495	0.00207419	0.00224238	0.00199461	0.0027425	0.00213233	0.00257123	0.00290599	0.00282146	0.00285001	0.00324828
Pentapeptide-4	0.976466	0.957214	0.660331	1.00907	0.455198	0.536304	0.79984	0.705471	0.501072	0.378459	0.577015	0.608029
Pentapotassium trihydrogen (hexane-1,6-diylbis(nitrilobis(methylene)))tetrakisphosphonate	0.00237987	0.00219793	0.0025553	0.002301	0.000723557	0.00270805	0	0.00298331	0.0029157	0.00250847	0.00282057	0.00281147
Pentazocine	0.00223001	0.00243115	0.00479511	0.00242158	0.000744562	0.00275725	0.0029912	0.00346259	0.00180018	0.00282821	0.00246614	0.00301962
Pentigetide	0.00533995	0.00467418	0.0030218	0.00412154	0.00493254	0.00466177	0.00363303	0.00485542	0.00331894	0.00274921	0.00373372	0.00476645
Pentosidine	0.0199464	0.0189699	0.0244436	0.0187576	0.00999938	0.0211712	0.024042	0.0214936	0.00870684	0.0141138	0.0157495	0.0226869
Peonidin-3-glucoside	0.0181317	0.0151562	0.0128867	0.0126701	0.00993819	0.0273129	0.0413773	0.0131015	0.00643491	0.00574159	0.0482754	0.0063062
Peptide 7194	0.00722972	0.00890287	0.00540787	0.00172514	0.0035097	0.00461447	0.00610993	0.00269737	0.00274119	0.0027351	0.00135688	0.00400114
Peptide tyrosine phenylalanine	0.0106668	0.00414436	0.00392325	0.00430708	0.000924228	0.00195476	0.00207363	0.00205775	0.0110795	0	0	0
Persicaxanthin	0.00952766	0.0104931	0.0123024	0.0109318	0.00573708	0.00793365	0.00715357	0.00823832	0.010932	0.0151069	0.0118666	0.0114595
Perulactone	0.0215921	0.0172146	0.0139525	0.0174798	0.0128951	0.0147545	0.0174031	0.0244563	0.0162594	0.012346	0.0100945	0.0132572
Petroselinic acid	0.00227933	0.00312415	0.00450238	0.0034163	0.00353029	0.0041902	0.00445944	0.00587166	0.00379778	0.00364268	0.00411727	0.00545529
PG(17:1(9Z)/22:2(13Z,16Z))	0.0211626	0.0129111	0.0229964	0.0163444	0.00209955	0.0173002	0.0147419	0.0329579	0.00296837	0.0196601	0.0163729	0.0234606
PG(18:0/18:1(11Z))	0.00148335	0.00466791	0.00233697	0.00265309	0.0061966	0.00295571	0.00326305	0.00205169	0.00204992	0.00285116	0.00295731	0.00315509
PG(20:0/22:4(7Z,10Z,13Z,16Z))	0.160884	0.0106451	0.396389	0.00692549	0.201516	0.41692	0.00726	0.294309	0.394076	0.351746	0.10143	0.0704983
PG(21:0/22:4(7Z,10Z,13Z,16Z))	0.0423074	0.0417197	0.064771	0.0441732	0.00954379	0.0249422	0.0446043	0.0448671	0.0146131	0.0377747	0.0139571	0.0205006
PG(a-13:/i-12:)	0.0364764	0.0211306	0.111811	0.112151	0.142154	0.107361	0.172307	0.175939	0.154123	0.155886	0.2032	0.219145
PG(O-20:0/20:3(8Z,11Z,14Z))	0	0.00526813	0.00379815	0.00337667	0.00814454	0.00386939	0.00758703	0.00134919	0.0017445	0.00813111	0.00283523	0.00197641
PG(P-16:/13:)	0.00863062	0.0407057	0.00892697	0.0490504	0.0507759	0.0438165	0.0463463	0.0495927	0.0520795	0.103379	0.104622	0.105784
PG(P-16:/14:)	0.00317501	0.0104548	0.00227641	0.0117926	0.0132963	0.0124947	0.0116463	0.0134237	0.0129094	0.0244086	0.0228504	0.0233088
PG(P-16:/2:5(5Z,8Z,11Z,14Z,17Z))	0.00546504	0.00695478	0.0070595	0.00816867	0.00945803	0.00924443	0.0102552	0.0181155	0.0203151	0.0212292	0.0225916	0.0227718
PG(P-16:0/12:0)	0.0128745	0.0136487	0.0112773	0.00447932	0.00858111	0.0110706	0.0115952	0.00931684	0.00774688	0.0103025	0.00402113	0.0116316
PGF2a ethanolamide	0.238719	0.262469	0.266908	0.286255	0.319399	0.310708	0.321758	0.41404	0.0329173	0.0357507	0.0441459	0.46199
PGP(16:0/16:1(9Z))	0.0171385	0.0174426	0.01353	0.0133048	0.0101184	0.00987843	0.009118	0.00698191	0.00570597	0.00580713	0.00707094	0.00586432
PGP(16:1(9Z)/16:1(9Z))	0.0126736	0.0114279	0.0241895	0.0127916	0.00367152	0.0120295	0.0147359	0.0130099	0.00333438	0.00595879	0.00549517	0.00965986
Phe Asp Glu Phe Leu	0.0327583	0.039616	0.0237	0.0375946	0.0426021	0.0319735	0.0327857	0.0858105	0.0292169	0.0260221	0.0283098	0.0332307
Phe Gln Gln Arg	0.0134626	0.0136548	0.00998332	0.0149823	0.00747084	0.00949679	0.00951933	0.00946763	0.00942483	0.00869375	0.0141975	0.0142156
Phe Glu His Phe Leu	0.0755464	0.08818	0.0503959	0.0436652	0.0551756	0.047276	0.061181	0.0487847	0.0562974	0.0304931	0.0277743	0.050605
Phe His Ile Ile	0.00320598	0.00274894	0.00331101	0.00456143	0.00176926	0.0025214	0.0021171	0.00185066	0.00231879	0.00435102	0.00437415	0.00328611
Phe His Met Trp	0.00469361	0.00461202	0.0040999	0.00471083	0.00358919	0.00348059	0.0039101	0.00447912	0.0041997	0.00381381	0.00453121	0.00403018
Phe Ile Gln Arg	0.00306334	0.00411206	0.0055573	0.00473976	0.00345897	0.00338647	0.00406613	0.00596393	0.0050415	0.00412014	0.00456183	0.00523481
Phe Ile Ile Tyr	0.0222451	0.00444475	0.0214567	0.0308067	0.00698568	0.0192614	0.0103728	0.0224543	0.00500014	0.0171206	0.0503333	0.0120251
Phe Ile Trp Trp	0.0187887	0.0164265	0.0175965	0.0199612	0.0180062	0.0194027	0.0199397	0.0157206	0.0168262	0.0146538	0.0205561	0.0185378
Phe Lys Lys Val	2.02416	2.0716	1.98482	2.05847	1.61554	1.60315	1.84337	1.98824	2.08874	1.99754	2.20057	1.93818
Phe Met Met Gln	0.0129141	0.0113566	0.0133234	0.0142307	0.0129327	0.015857	0.0161098	0.0207406	0.0135594	0.0200433	0.0157667	0.021499
Phe Phe Arg Arg	0.0736067	0.0692242	0.0460952	0.0485882	0.0531139	0.0478887	0.049569	0.0487835	0.0586926	0.0349293	0.0259788	0.0469996
Phe Phe Phe Trp	0.0209474	0.0207969	0.0150718	0.0148008	0.0103741	0.0145026	0.0106674	0.0077407	0.0155647	0.00415178	0.00299575	0.00651166
Phenelzine	0.0116153	0.0108406	0.00750302	0.00793958	0.0129167	0.0129782	0.0107157	0.00960349	0.010565	0.00909501	0.00790966	0.0107989
Phenethyl rutinoside	0.0176198	0.0299461	0.015642	0.0137235	0.0232421	0.0274387	0.0241761	0.0418379	0.0169027	0.0222902	0.0189257	0.0311548
Phenol	0.0930802	0.0310782	0.0155015	0.014737	0.0846493	0.0375963	0.0621524	0.0543883	0.0229578	0.0240039	0.0182763	0.0518265
Phenol sulphate	0.70191	0.246825	0.123267	0.102356	0.608184	0.256675	0.46919	0.414966	0.183343	0.204226	0.137016	0.372326
Phenylacetylene	0.0230347	0.0274869	0.0229154	0.0255386	0.0272112	0.0280836	0.0273867	0.0301011	0.0277698	0.0279674	0.0200977	0.0276745
Phenylacetylglycine	0.0484579	0.0343752	0.0203951	0.0180274	0.0787424	0.0513509	0.10645	0.0586318	0.0197236	0.00914325	0.0174193	0.0363223
Phenylalanyl-Glutamate	0.00515351	0.00541049	0.00288054	0.004425	0.00962968	0.00779524	0.00941585	0.00733405	0.00664318	0.00581515	0.00294776	0.0087866
Phenylethanolaminium	0.0108448	0.0157505	0.0154628	0.0185474	0.0201587	0.0152376	0.0185305	0.0213089	0.014748	0.0138267	0.0126113	0.0115623
Phosphine oxide, oxophenyl-	0.00793553	0.00961045	0.0111165	0.00925126	0.00424412	0.0105296	0.00275123	0.0109665	0.0114431	0.0120321	0.0118574	0.0114587
Phosphine sulfide, tris(dibutylaminomethyl)-	0.0151321	0.0115687	0.0188825	0.0186308	0.020234	0.0182582	0.017008	0.0197063	0.0195005	0.0184028	0.0174557	0.0189
Phosphocreatinine	0.119043	0.113465	0.0955772	0.0962638	0.154498	0.161458	0.115435	0.0917968	0.0637239	0.069429	0.0496675	0.0889967
Phosphonic acid, (1-hydroxyethylidene)bis-, potassium salt	0.00514677	0.00502701	0.00517966	0.0047424	0.0053842	0.00504187	0.00444549	0.00440641	0.00405491	0.00440924	0.00397427	0.00453247
Phosphonic acid, [[(phosphonomethyl)imino]bis[2,1-ethanediylnitrilobis(methylene)]]tetrakis-, heptasodium salt	0.0246931	0.0217897	0.0273406	0.0251629	0.0274241	0.0249788	0.0253548	0.0249557	0.01837	0.0207011	0.0196347	0.0233261
Phosphoribosyl formamidocarboxamide	0.0131513	0.00124285	0.0111992	0.0149507	0.0108215	0.0302362	0.00925296	0.0199649	0.00330323	0.00442882	0.00356455	0.00662895
Phosphoribosyl pyrophosphate	0.033757	0.0419904	0.0339975	0.0313372	0.0312855	0.0327951	0.0152939	0.0339916	0.0189799	0.0175141	0.0132935	0.017081
Phosphoribosylformylglycinamidine	0.0113995	0.00514651	0.00486681	0.0164802	0.0288141	0.0552065	0.0287558	0.0233211	0.00523387	0.00364722	0.00306344	0.00650961
Phosphoric acid, dioctyl ester, compd. with N,N-dimethyl-1-octadecanamine (1:1)	0.0500901	0.0305908	0.0495973	0.0348436	0.0359974	0.0461742	0.0434912	0.0392236	0.03773	0.0393527	0.0435054	0.0429421
Phosphorodithioic acid, O,O-dimethyl ester, S-ester with 2-(mercaptomethyl)-3(2H)-pyridazinone	0.104725	0.0500019	0.077225	0.0409084	0.0400177	0.0486343	0.0598198	0.102449	0.0175793	0.0268765	0.0248121	0.0488748
Phthalide	0.00472184	0.00500469	0.00541979	0.00515738	0.00543758	0.00551918	0.0055332	0.00508935	0.00583239	0.00525056	0.0055254	0.0051191
Physalin A	0.00313381	0.0060375	0.000613235	0.000223208	0.00213506	0.00371002	0.00417952	0.00020489	0	0	0.000740542	0.00287772
Physalin I	0.0244073	0.0195104	0.0223963	0.0245866	0.0210256	0.0264926	0.0252964	0.0371564	0.0227722	0.0322912	0.0282295	0.0384673
Physalin L	0.0173367	0.0160028	0.00394372	0.00713744	0.0109152	0.0102928	0.0100648	0.00336638	0.00289189	0.00136362	0.00186742	0.00754012
Phytol	0.0103397	0.00443323	0.00526716	0.0103049	0.00634983	0.011434	0.00605392	0.00888432	0.00474386	0.00726323	0.0166362	0.0100921
Phytosphingosine	0.0512408	0.0230599	0.0246692	0.0511037	0.0294575	0.0573428	0.0274429	0.0453414	0.0253812	0.0384308	0.0816629	0.0543865
PI(13:0/18:3(6Z,9Z,12Z))	0.00646917	0.00501681	0.0111032	0.00229007	0.00529778	0.0105492	0.00313345	0.00606059	0.0112148	0.00844151	0.0211473	0.00289426
PI(15:1(9Z)/22:2(13Z,16Z))	0.0507422	0.00499944	0.0461616	0.0466686	0.0332234	0.09975	0.0258378	0.0291777	0.111099	0.0667446	0.0509048	0.0249887
PI(16:0/22:2(13Z,16Z))	0.00226381	0.00217778	0.00318658	0.00241497	0.00104742	0.00213365	0.00301272	0.00398975	0.00195679	0.00238741	0.00220869	0.00304482
PI(18:0/22:4(10Z,13Z,16Z,19Z))	0.0180278	0.0279504	0.0259409	0.0252867	0.0282776	0.0229551	0.0174819	0.0375572	0.0526527	0.0461604	0.0261492	0.0164335
PI(18:2(9Z,12Z)/:)	0.297093	0.289587	0.229527	0.264877	0.105869	0.173298	0.165898	0.174368	0.193634	0.0546458	0.07521	0.105185
PI(19:0/0:0)	0.816343	0.886429	0.742068	0.793236	0.72742	0.859305	0.705119	0.688337	0.887711	0.701336	0.819985	0.957565
PI(22:6(4Z,7Z,10Z,13Z,16Z,19Z)/0:0)	0.0580621	0.0613113	0.0444515	0.0435756	0.0274716	0.0409314	0.0335163	0.0259315	0.0509724	0.0134469	0.0222396	0.0229835
PI(O-16:/:)	0.237628	0.229272	0.226935	0.239116	0.25573	0.269779	0.247618	0.249592	0.280577	0.311847	0.325327	0.365505
PI-Cer(t20:0/26:0(2OH))	0.00737615	0.00869064	0.00970745	0.00743441	0.00518429	0.00586731	0.00525608	0.00877146	0.00538469	0.00789677	0.00910567	0.00912108
Pigment A aglycone	0.00362646	0.00250803	0.00282741	0.00196081	0.00178985	0.00539009	0.00885898	0.00264522	0.00131677	0.000756345	0.00861677	0.00142153
Pindolol	0.0101683	0.0284967	0.00457761	0.0129961	0.0500031	0.016411	0.0255801	0.0181241	0.0272405	0.0160892	0.0162603	0.0218889
PIP(16:0/22:5(4Z,7Z,10Z,13Z,16Z))	0.00917454	0	0.00850945	0.00903166	0.0074581	0.0162803	0.00424196	0.00605099	0.0165523	0.014594	0.0100784	0.00518766
PIP(16:1(9Z)/16:1(9Z))	0.0171389	0.0212213	0.0219335	0.0287522	0.018259	0.0232362	0.0151286	0.0203306	0.0150741	0.0212087	0.0155511	0.0136992
PIP(18:0/20:3(5Z,8Z,11Z))	0.00695128	0.00883465	0.01316	0.00934851	0.00462574	0.00658361	0.00812155	0.00712319	0.00925581	0.0125603	0.00859942	0.00965403
PIP(18:2(9Z,12Z)/20:1(11Z))	0	0.000830734	0.0013178	0.000983918	0.000921083	0.000743533	0.000555816	0.00160564	0.00174046	0.000620325	0.000740266	0.00119354
Pipecuronium	0.019746	0.0179109	0.0174026	0.01821	0.0177501	0.0165447	0.015693	0.0208285	0.0150356	0.0136093	0.0221913	0.0197122
Pipercide	0.0115174	0.0120056	0.0150329	0.002114	0.00325138	0.0133281	0.020591	0.025954	0.00779085	0.00435203	0.00140348	0.00087935
Pipericine	0	0.000169632	0.00310671	0.00172091	0.00307148	0.0283258	0.00360421	0.0119506	0.00161774	0.00327542	0.00131502	0.00084533
Piperidine	0.3546	0.342452	0.308904	0.365576	0.344543	0.415755	0.449475	0.391197	0.383305	0.366703	0.238231	0.337843
Piperidine, 1-((4-methyl-1-piperazinyl)acetyl)-2,2,6,6-tetramethyl-	0.0560621	0.0572733	0.130157	0.0684675	0.0176704	0.0594672	0.0728523	0.0967027	0.0351612	0.0674448	0.0531864	0.0673194
Piperidinium, 1-(2-methyl-5-piperidino-2,4-pentadienylidene)-, pamoate, tetrahydrate	0.0167009	0.017038	0.0251479	0.0135606	0	0.000970385	0.00447537	0.00500761	0.00715703	0.0117464	0.00504744	0.00431321
Piperolein B	0.00505518	0.00806045	0.0137249	0.00700366	0.00735402	0.011892	0.00959097	0.011038	0.00851488	0.00648767	0.0176312	0.0118055
Piplartine	0.00626506	0.00429228	0.00664369	0.00546456	0.00676205	0.00789806	0.0090822	0.00591489	0.0041912	0.0036481	0.00509613	0.00429132
Pirimicarb	0.00580138	0.00839301	0.00976306	0.0060618	0.00927508	0.0192551	0.0109085	0.0111922	0.0079984	0.00563611	0.0285536	0.0105768
Pisumionoside	0.0107378	0.00631553	0.0112867	0.0111358	0.0114641	0.0111991	0.00909308	0.0064677	0.00646347	0.00542678	0.00669016	0.00738475
Pitheduloside B	0.0171147	0.0220606	0.0235331	0.03031	0.0197312	0.0219075	0.0163635	0.0195681	0.0151677	0.0219442	0.016645	0.0157357
Plakoside A	0.00421328	0.00392959	0.00387332	0.00412142	0.00446555	0.00408096	0.0037853	0.00381104	0.00444471	0.00415706	0.00373596	0.00449821
Plastochromanol 8	0.00194299	0.00217683	0.00257121	0.00341283	0.0061851	0.00323109	0.00309806	0.00232682	0.00237024	0.00229211	0.0033151	0.00386519
Plastoquinone 3	0.492642	0.446368	0.873961	0.251035	0.481362	0.341598	0.518236	0.783361	1.17813	0.525247	0.39006	0.334158
Plastoquinone 8	0	0.00606254	0.00280934	0	0.0057799	0	0.00734836	0.00585781	7.25e-05	0.00135004	0.00226803	0.00421758
Plitidepsin	0.0312463	0.0300593	0.0250576	0.0254395	0.0307003	0.0332148	0.0255598	0.0338074	0.0323058	0.0225036	0.0239712	0.0327964
Poa-His-Cha-psi(CH(OH)CH(OH))-Val-Ile-Amp	0.00474521	0.00390327	0.00376991	0.00260364	0.00320957	0.00333475	0.00334455	0.00344797	0.00348689	0.00352524	0.00390541	0.00338832
Polyoma peptide antigen MT162-176	0.00364073	0.0043495	0.00492865	0.00525152	0.00554462	0.00552003	0.00493398	0.00627407	0.00523271	0.00615694	0.00450985	0.00596971
Polyoxyethylene (600) monoricinoleate	0.0042251	0.00612	0.0133923	0.00609693	0.00410022	0.00386622	0.00438866	0.00640075	0.00645489	0.00617638	0.00723549	0.00611978
Polysorbate 20	0.032015	0.0300982	0.0279065	0.0286024	0.0307475	0.0262176	0.025919	0.0296338	0.0265872	0.0253788	0.0226039	0.0262295
Polysorbate 60	0	0.000227779	0.00419168	0.00322071	0.00305427	0.000123446	0.00286657	0.00384732	0.00103462	0.00252822	0.00311852	0.00307484
Potassium S-(2,5-dihydroxyphenyl) sulfurothioate	0.00642497	0.00567671	0.0046668	0.00557476	0.00524299	0.00508621	0.00379118	0.00488643	0.00611863	0.00542626	0.00544698	0.00507991
Potassium thiocarbonate	0.189185	0.175553	0.192352	0.193283	0.194566	0.201887	0.194757	0.192083	0.175404	0.184748	0.182866	0.1967
Prednicarbate	0.000803001	0.00572308	0.000551613	0.00119277	0	0	0.00392987	0.000254006	0	0	0	0.000763128
Pregnanetriol	0.000653096	0.00157722	0.00019077	0.00195496	0.00194126	0.00205256	0.00170138	0.00229165	0.00216891	0.00220975	0.00276376	0.00264782
Preproatrial natriuretic factor (104-123)	0.173115	0.193111	0.188006	0.18788	0.243124	0.205605	0.159987	0.180403	0.216454	0.193417	0.182826	0.190582
Presqualene diphosphate	0.00380865	0.00348367	0.00517672	0.00574982	0.00699169	0.00605815	0.00604568	0.00520438	0.00640966	0.00640743	0.00461495	0.00581073
Progesterone 3-PEG11-biotin	0.00327179	0.00337188	0.0024337	0.00330521	0.00330425	0.00529837	0.00565357	0.00199108	0.00403699	0.00380526	0.00141273	0.002691
Pro-Leu-Ser-Arg-Thr-Leu-Ser-Val-Ala-Ala-Lys-Lys	0.0250591	0.0206738	0.0246168	0.0265416	0.0269469	0.0249492	0.0253578	0.0181109	0.016956	0.0183098	0.0189767	0.0207198
Proline betaine	0.0232945	0.0201912	0.0173373	0.01516	0.0181546	0.0160604	0.0225331	0.0216922	0.0229531	0.0320311	0.0149764	0.0241335
Propan-2-yl 2-acetamido-3,4,6-tri-O-acetyl-2-deoxyhexopyranoside	0.000378367	0.0026803	0.000445816	0.00322897	0.00286691	0.00283252	0.00274815	0.00200332	0.00293787	0.00529944	0.00568215	0.0055236
Propanamide, N,N',N''-1,3,5-benzenetriyltris[2,2-dimethyl-	0.251559	0.290357	0.266742	0.27243	0.259866	0.261261	0.258228	0.300633	0.302955	0.309282	0.288371	0.326067
Propanedinitrile, ethylidene-	0.0478566	0.0666066	0.0548289	0.0606495	0.048619	0.0415612	0.04108	0.0482408	0.0544714	0.0483166	0.0463	0.0625439
Propanoic acid, 3-(dodecylthio)-, oxybis(2,1-ethanediyloxy-2,1-ethanediyl) ester	0.00900402	0.0125223	0.00918172	0.00987316	0.00996607	0.0102533	0.0106288	0.00910347	0.00881244	0.00992192	0.0093843	0.0101043
Propionamide, N-(2-(3,3-dimethylpiperidino)-1-methylethyl)-N-2-pyridyl-, S(+)-	0.0168299	0.0161898	0.0291897	0.0193188	0.00461215	0.0174046	0.0197921	0.0251106	0.00827558	0.0173571	0.00896582	0.0128128
Propionic acid	0.00727623	0.0315718	0.0140989	0.0116758	0.0283593	0.0225954	0.0234332	0.0517318	0.0096503	0.00818194	0.00846856	0.0363155
Propionylcarnitine	0.0400608	0.0581207	0.0346136	0.0467801	0.0547924	0.0522536	0.0984522	0.082264	0.0334161	0.0397508	0.029478	0.0815027
Propofol glucuronide	0.0276333	0.0293547	0.0244009	0.0244385	0.0236793	0.0235123	0.0168033	0.0507798	0.0244014	0.0256362	0.023948	0.0269104
Propyl 1-(propylsulfinyl)propyl disulfide	0.0293254	0.0190612	0.0144962	0.0108116	0.00877859	0.00481115	0.0317258	0.0112809	0.00643267	0.00241011	0.00846509	0.00158484
Propylthio radical	0.00290001	0.00258414	0.00240279	0.00152063	0.0026067	0.00473699	0.00173388	0.00492835	0.00237259	0.00257565	0.00222399	0.00276911
Prorocentrolide	0.00511645	0.00802395	0.0164303	0.00803891	0	0.00102227	0	0.00513379	0.00462098	0.0106479	0.00163647	0.00254207
Prostaglandin E2-PEG11-biotin	0.184239	0.193599	0.166652	0.175873	0.140741	0.287941	0.286852	0.146828	0.1164	0.295492	0.130045	0.140165
Prostaglandin G2 2-glyceryl Ester	0.00609312	0.00679696	0.00583802	0.00795824	0.00498888	0.00424769	0.00624252	0.00488307	0.00624865	0.00671573	0.00496739	0.00694195
Protobassic acid	0.00878847	0.010794	0.0108763	0.00999916	0.00915095	0.00704605	0.00747696	0.0100802	0.00961184	0.0118565	0.010205	0.00976536
Prunasin	0.0139431	0.00432555	0.00952506	0.0123742	0.00433826	0.00436353	0.00986305	0.0133382	0.00655284	0.0224015	0.0109129	0.00398367
Prunin 6''-O-gallate	0.00393307	0.00323995	0.00399345	0.00401256	0.00477252	0.00428508	0.00825091	0.00473772	0.00458582	0.00309194	0.00389551	0.00351801
PS(14:0/18:1(9Z))	0.0225322	0.018096	0.019169	0.0162766	0.0122131	0.0189089	0.0146227	0.0321809	0.0101489	0.00772142	0.0126839	0.0194604
PS(14:0/24:1(15Z))	0.0116285	0.0118246	0.0210802	0.0820368	0.00435409	0.0166421	0.0191668	0.062143	0.0250299	0.033853	0.00907643	0.0149015
PS(14:1(9Z)/20:4(5Z,8Z,11Z,14Z))	0.0174952	0.0173524	0.0137869	0.012682	0.00972806	0.00862881	0.00962619	0.0057246	0.00539874	0.00396632	0.00523867	0.00432048
PS(14:1(9Z)/24:1(15Z))	0.00666458	0.00898455	0.0136471	0.00968437	0.00319669	0.00845193	0.00919946	0.0103301	0.00559899	0.00677604	0.00506263	0.00713647
PS(15:0/18:2(9Z,12Z))	0.0393316	0.0403986	0.0317517	0.0290037	0.0239454	0.0189286	0.0167071	0.0183581	0.0146014	0.0160948	0.0140258	0.0101753
PS(16:1(9Z)/22:2(13Z,16Z))	0.0442828	0.0329068	0.0528516	0.0308735	0.00636671	0.0303527	0.0384377	0.0706487	0.0315439	0.0478475	0.047402	0.0569309
PS(17:0/22:2(13Z,16Z))	0.185994	0.309595	0.384413	0.263962	0.0619046	0.146281	0.258748	0.29803	0.144614	0.105334	0.0530233	0.0868843
PS(18:0/22:4(7Z,10Z,13Z,16Z))	0.00690419	0.00528541	0.0117625	0.0106847	0.00186353	0.00879592	0.0093994	0.00942406	0	0	0	0.000966931
PS(18:0/24:0)	0	0	0.0017104	0.00202721	0.00475239	0.00221388	0.0021573	0.00154744	0.00142715	0.00234569	0.00284629	0.00244625
PS(18:1(11Z)/22:2(13Z,16Z))	0.00806925	0.0111204	0.0100901	0.0117747	0.00405683	0.0095434	0.0122989	0.0158962	0.0122751	0.0130258	0.0133312	0.0213842
PS(18:2(9Z,12Z)/24:1(15Z))	0.0139726	0.012733	0.0200246	0.0132747	0.0102058	0.00895768	0.0180208	0.0147	0.00938172	0.0283787	0.00817723	0.00692537
PS(18:3(6Z,9Z,12Z)/0:0)	0.00989951	0.00800637	0.0121534	0.0116711	0.00816565	0.0065107	0.00970592	0.00759249	0.00571997	0.00585815	0.0071519	0.00671218
PS(18:3(6Z,9Z,12Z)/24:1(15Z))	0.0788035	0.0777616	0.12518	0.0792575	0.0173113	0.0466047	0.0845914	0.0863874	0.0271066	0.0267688	0.0222062	0.0402406
PS(19:/:)	0.0233881	0.0261502	0.0274333	0.0272512	0.0270789	0.0249169	0.0259586	0.0162466	0.0148733	0.012313	0.0250863	0.0144616
PS(19:1(9Z)/0:0)	0.0471879	0.0498171	0.0270471	0.0353556	0.0231194	0.0246714	0.0384929	0.0336185	0.029199	0.0173545	0.0188096	0.0361445
PS(2:/:)	0.30437	0.226352	0.204529	0.206873	0.162786	0.151217	0.209292	0.190544	0.116541	0.094844	0.0972241	0.143711
PS(20:0/22:5(4Z,7Z,10Z,13Z,16Z))	0.00995753	0.00840155	0.0118346	0.00693155	0.0018541	0.00606402	0.00861683	0.0144396	0.010415	0.0125834	0.0154201	0.0176051
PS(20:0/24:0)	0.00185619	0.00251292	0.00343471	0.0037752	0.0086235	0.00499794	0.00433223	0.00287628	0.00363598	0.00412926	0.00463727	0.00420826
PS(20:1(11Z)/0:0)	0.0166607	0.0165719	0.0118749	0.0169468	0.00876231	0.00940161	0.0126179	0.0118046	0.0108205	0.00790056	0.00977916	0.0121547
PS(20:2(11Z,14Z)/0:0)	0.0568121	0.1331	0.0717686	0.0855972	0.0567376	0.0373532	0.0495545	0.05846	0.0873386	0.104367	0.07047	0.0445942
PS(20:3(5Z,8Z,11Z)/22:5(4Z,7Z,10Z,13Z,16Z))	0.00788493	0.00955592	0.00775738	0.0150518	0.0127064	0.0124977	0.0125496	0.0105585	0.00993158	0.008077	0.00875416	0.00796091
PS(20:3(8Z,11Z,14Z)/0:0)	0.0571558	0.0635529	0.0715336	0.0670877	0.0333077	0.0318404	0.0513025	0.0526048	0.0466698	0.0585254	0.040923	0.0449085
PS(22:0/0:0)	0.116363	0.115046	0.0972105	0.0841442	0.0746936	0.0761086	0.0886345	0.0948645	0.0654528	0.0500636	0.0467776	0.0627965
PS(22:2(13Z,16Z)/0:0)	0.011528	0.00941275	0.012171	0.00842818	0.00779318	0.00538143	0.00738181	0.0124913	0.0108828	0.00673504	0.00687624	0.00835109
PS(22:2(13Z,16Z)/15:0)	0.16592	0.0757764	0.451848	0.0417396	0.203277	0.398954	0.0585931	0.0992355	0.146009	0.0625398	0.0260283	0.0292655
PS(22:2(13Z,16Z)/22:5(4Z,7Z,10Z,13Z,16Z))	0.0044504	0.00366175	0.00657462	0.00435212	0.00178901	0.00312612	0.00513522	0.00805655	0.00383185	0.00493935	0.00414557	0.00577303
PS(22:6(4Z,7Z,10Z,13Z,16Z,19Z)/24:1(15Z))	0	0.000438757	0.00264618	0.00196289	0.00393463	0.000994431	0.00226583	0.00558351	0.00160995	0.0017581	0.00287705	0.00410408
PS(DiMe(11,3)/DiMe(11,5))	0.102527	0.0092545	0.0936759	0.0958621	0.0715856	0.205004	0.0496819	0.0585143	0.228788	0.138462	0.103222	0.0482347
PS(DiMe(11,3)/DiMe(13,5))	0.00647248	0.00324263	0.00170831	0.00602738	0.00813353	0.00814001	0.0141764	0.00519913	0.00576943	0.0161275	0.02458	0.0128975
PS(DiMe(13,5)/DiMe(13,5))	0.00444525	0.00466444	0.0030065	0.00408612	0.00146564	0.00181215	0.0033589	0.00313697	0.00312784	0.00242504	0.00343912	0.00346881
PS(DiMe(13,5)/MonoMe(13,5))	0.00300133	0.00187914	0.000595075	0.00109337	0.00239691	0.00319067	0.00107265	0.00142707	0.000473369	0.000240485	0.00121701	0.00180817
PS(O-16:0/14:0)	0.0167733	0.0127708	0.0137445	0.0123652	0.0103808	0.014129	0.0125759	0.0154948	0.00742312	0.0133046	0.0123895	0.0143686
PS(O-16:0/18:3(9Z,12Z,15Z))	0.00890269	0.00901354	0.0101492	0.0106346	0.010269	0.00932145	0.00911933	0.0101552	0.0113493	0.0113292	0.0106664	0.0116832
PS(O-18:0/0:0)	0.0081442	0.0100178	0.00812884	0.00993966	0.00979964	0.00913672	0.0102924	0.0100132	0.00948495	0.0100747	0.00863482	0.00982026
PS(O-20:0/20:3(8Z,11Z,14Z))	0.0500461	0.0544706	0.582495	0.0542916	0.0201017	0.0505991	0.0394575	0.182678	0.408836	0.166267	0.0708636	0.0477635
PS(O-20:0/22:1(11Z))	0.00167692	0.00275987	0.00323918	0.0041921	0.0105378	0.00565909	0.0050863	0.00323553	0.00385729	0.00508117	0.00545617	0.0055755
PS(O-20:0/22:6(4Z,7Z,10Z,13Z,16Z,19Z))	0.00300454	0.00355744	0.0047894	0.00312949	0.000979531	0.0022054	0.00265871	0.00459924	0.00209	0.00329281	0.00226963	0.00337248
PS(P-16:0/12:0)	0.0645768	0.0667753	0.182808	0.06489	0.0068456	0.0533011	0.0777039	0.0811638	0.012181	0.0371628	0.019408	0.0249499
psi-Taraxasteryl acetate	0.000470043	0.000738274	0.000742725	0.000911406	0.000674678	0.000887687	0.000566312	0.000706944	0.00237652	0.000849712	0.000556834	0.000622067
PS-NAc(18:0/18:1(9Z)/16:0)	0.0785969	0.0959129	0.089647	0.0949184	0.0245039	0.0912414	0.00554877	0.105568	0.13601	0.137156	0.121887	0.116028
PtdIns-(3,4,5)-P3 (1,2-dioctanoyl)	0.00493314	0.00297896	0	0.000224145	0.00219807	0	0.00223357	0	0	0	0	0.000797193
Ptelatoside B	0.11901	0.604113	0.125488	0.1307	0.10694	0.161597	0.42545	0.442048	0.194642	0.351174	0.215849	0.286918
PUBCHEM_16219318	0.124955	0.118909	0.116578	0.0701484	0.0879187	0.100484	0.133971	0.115127	0.0997384	0.118461	0.0915306	0.127067
PUBCHEM_16219928	0.813898	0.804789	1.59902	0.908795	0.23814	0.828778	1.018	1.20186	0.398713	0.859388	0.55156	0.843464
PUBCHEM_24182103	0.00199331	0.00216686	0.00410895	0.00371567	0.000172454	0.000574035	0.00058613	0.0019146	0.00313327	0.00633074	0.00349643	0.00283639
PUBCHEM_53432329	0.00396208	0.00862307	0.0126487	0.00861916	0.00756681	0.00480942	0.00729939	0.0126532	0.00877091	0.00465789	0.00553366	0.00876146
PUBCHEM_54601070	0.0214857	0.0206097	0.0192966	0.0220221	0.0160848	0.0168417	0.021548	0.0212824	0.0227466	0.0213345	0.0248311	0.0175638
PUBCHEM_57376694	0.0171617	0.0127571	0.0374756	0.0176718	0.00211218	0.0149572	0.0114343	0.0280685	0.0059224	0.0131375	0.00745908	0.0108579
PUBCHEM_71312124	0.0349517	0.0429552	0.0279018	0.0232467	0.0244267	0.0283838	0.0301705	0.0309101	0.0230902	0.0248035	0.0263377	0.0288801
PUBCHEM_71312276	0.0134598	0.0145955	0.0102337	0.0119253	0.00740523	0.00869622	0.00978372	0.0141128	0.0148244	0.00822163	0.0134385	0.0141803
PUBCHEM_71339979	0.0247297	0.0304385	0.0243687	0.0257604	0.0312067	0.0337202	0.0304445	0.0230208	0.00849376	0.0174614	0.00998274	0.0137367
PUBCHEM_71369437	0.0312583	0.0291942	0.0220132	0.0303196	0.0313991	0.0281157	0.0292918	0.0273634	0.0312298	0.0340225	0.0295761	0.0266305
PUBCHEM_71377892	0	0.00091544	0.00581931	0.0059558	0.00472857	0.000484493	0.00554419	0.0114556	0.00202464	0.00101325	0.00289069	0.00448632
PUBCHEM_71433817	0.00538655	0.00556058	0.0045574	0.00572048	0.00396328	0.00404158	0.00537577	0.00551837	0.00587518	0.00515167	0.00634134	0.00548548
PUBCHEM_71751866	0.00224855	0.0020883	0.00628926	0.00264669	0.000314354	0.000581996	0.00177435	0.00124055	0.00130118	0.00326613	0.00247474	0.00148292
PUBCHEM_71752353	0.000875127	0.00145325	0.00229539	0.00142938	0	0.000726953	0.000137243	0.000307018	0.00283684	0.00168596	0.00105768	0.002568
Pyrene	0.000255057	0.000786725	0.000527294	0.000377695	0.000265514	0.00120424	0.00225438	0.000369574	0.0002593	0.000154082	0.00230008	8.7e-05
Pyrextramine	0.156173	0.156319	0.140635	0.13958	0.152778	0.148617	0.14586	0.155577	0.141882	0.120708	0.149029	0.178915
Pyridine N-oxide glucuronide	0.0477018	0.0534659	0.0384927	0.0442678	0.0591529	0.0593116	0.0490979	0.0502876	0.0587906	0.0456951	0.0476628	0.0563658
Pyrido[1,2-a][1,4]diazepine, 4-hexyldecahydro-2-methyl-4-nitro-	0.0117177	0.00870904	0.0233604	0.00926104	0.000978857	0.0103613	0.0111579	0.0192075	0.00286413	0.0144681	0.00496759	0.00495024
Pyriminobac-methyl	0.00387056	0.00709225	0.0053375	0.00682266	0.00927407	0.00413829	0.00580587	0.00478403	0.00928933	0.00703913	0.00647435	0.00649156
Pyroglutamic acid	0.123129	0.146954	0.10575	0.126342	0.0912876	0.109253	0.145973	0.110696	0.150707	0.134042	0.116915	0.164535
Pyropheophytin b	0.00680596	0	0.0101953	0.0150052	0.0179713	0.00922646	0.0259444	0.0341034	0.00919059	0.021011	0.0198911	0.0247006
Pyrrole-2-carboxylic acid	0.00260826	0.0018017	0.00513803	0.00374146	0.00112877	0.000873709	0.00276158	0.00328829	0.0017457	0.00369794	0.00265957	0.00093572
Pyrrolidine	0.0701461	0.0705165	0.0641904	0.0743892	0.0744851	0.0838916	0.0825935	0.0765105	0.0749786	0.0700222	0.0462668	0.0609592
Quaternium-52	5.92e-05	0.000763137	0.00153988	0.00046737	0.00137798	0.00142744	0.00204454	0.000634788	0.00238772	0.00106672	0.00210916	0.00322219
Quercetin 3-(3'',6''-di-p-coumarylglucoside)	0.00619322	0.008015	0.00306756	0.00109591	0.00327742	0.00370621	0.00526127	0.00117768	0.00099005	0.00150797	0.000193392	0.00340129
Quercetin 3-(6''-malonyl-glucoside)	0.00301521	0.0023877	0.00372078	0.00277994	0.00295748	0.00448624	0.00806285	0.00361111	0.00432124	0.0022088	0.00441528	0.00448403
R 87366	0.013215	0.0264159	0.0124284	0.0173556	0.0129389	0.00876926	0.0104245	0.0088418	0.0117233	0.0116706	0.00627327	0.00462733
Ramontoside	0.00778892	0.00408292	0.00440367	0.00352082	0.00294707	0.0054012	0.010836	0.00304508	0.0023381	0.00193087	0.00867464	0.00221435
Rebaudioside C	0.00858657	0.00869779	0.0127268	0.0106708	0	0	0.00135792	0.00474952	0.00800676	0.024238	0.0127577	0.00857666
Repaglinide	0.00448147	0.0261536	0.00986307	0.012107	0.0471323	0.00904888	0.0139195	0.0289638	0.0200685	0.00677918	0.0362804	0.0449934
Retinal	0.00997728	0.0109353	0.0247814	0.0135505	0.00362983	0.011216	0.0135676	0.0192741	0.00666345	0.0129011	0.0105592	0.0128604
Rhizoxin	0.00722276	0.00257988	0.0492815	0.0428713	0.000765421	0.000535255	0.0224579	0.0403362	0.00139253	0.00632195	0.00218944	0.00104729
Rhodanine, 1,4-phenylenebis(5-methylene-	0.0578233	0.0723146	0.0598644	0.0628115	0.0573844	0.0635107	0.0417743	0.073768	0.0627559	0.063212	0.0634509	0.0773317
Riboflavine 2',3',4',5'-tetrabutanoate	0.0303529	0.0293678	0.0214018	0.0313501	0.0204307	0.0241046	0.0221516	0.0244007	0.0260618	0.021227	0.0342319	0.0308296
Ribose-1-arsenate	0.266152	0.37776	0.264806	0.275509	0.264788	0.276251	0.161292	0.334497	0.205713	0.189988	0.138759	0.171115
Ricinolein, tri-, trisulfate	0.0464167	0.0471138	0.0481028	0.0484774	0.0992925	0.100466	0.110713	0.0417467	0.0375566	0.04129	0.0520286	0.0613201
Rivastigmine	0.00242305	0.00212228	0.00245622	0.00287867	0.00323676	0.00807362	0.00323622	0.00433421	0.00428306	0.00630741	0.00395597	0.00342421
Rocuronium	0.0047563	0.00601156	0.0184752	0.0133831	0.0132219	0.0113632	0.0135499	0.0223419	0.0145992	0.0119	0.0138902	0.0160221
Rosmarinic acid	0.00495287	0.00264296	0.00169542	0.00123722	0	0	0.0038869	0	0	0	0.00570622	0
Roxatidine acetate	0.000607828	0.00146704	0.00387571	0.00325277	0.00324829	0.00216868	0.00428745	0.00598146	0.00290152	0.00262297	0.00378011	0.00569237
Rutaretin 9-rutinoside	0.00869772	0.000466038	0.00938074	0.00735282	0.00333084	0.00994982	0.011266	0.00796222	0.00330882	0.0079541	0.00955762	0.0115865
Rutin	0.00118398	0.00401647	0.00948456	0.00796551	0.00773961	0.00924741	0.0224501	0.0132774	0.00255096	0.00206872	0.0235649	0.00674879
S-(4,5-Dihydro-2-methyl-3-furanyl) ethanethioate	0.00318703	0.00203708	0.0026152	0.00154462	0.00365373	0.00334029	0.00429998	0.00306892	0.00179148	0.00193958	0.00127011	0.00270275
S-(9-deoxy-delta9,12-PGD2)-glutathione	0.0580236	0.0732821	0.0490172	0.0652597	0.0730026	0.0509397	0.0556991	0.17426	0.0558416	0.051519	0.0499921	0.0568253
Saccharin	0.00852744	0.0102217	0.00809652	0.00822398	0.00700117	0.00525927	0.00514096	0.00519105	0.00534247	0.00462442	0.00421702	0.00408694
S-Adenosylmethioninamine	0.0551238	0.0948192	0.0449471	0.0407389	0.0547497	0.102993	0.0646708	0.108976	0.0438623	0.0520369	0.0890868	0.0824037
S-Adenosylmethionine	0.00739744	0.0200809	0.00393837	0.00545	0.00737251	0.00497555	0.0130168	0.00667135	0.00343157	0.0044233	0.00392076	0.00839305
Safflomin C	0	0	0.000386979	0.00046081	0.000342706	0.000556455	0.00155692	0.000986845	0	6.81e-05	0.00135586	0.000445686
Salbutamol	0.0259806	0.0103647	0.00469862	0.0182426	0.00651055	0.00419246	0.00756266	0.0112584	0.0110721	0.0230091	0.00777255	0.00489566
Salsoline-1-carboxylate	0.00735735	0.0167443	0.00938009	0.0145329	0.00966903	0.0061595	0.0053437	0.00877256	0.00597044	0.0047964	0.00366462	0.00748031
Samarium--zirconium (1/5)	0.00179457	0.00253799	0.00173612	0.00141863	0.00308775	0.0010206	0.00272774	0.00355693	0.00171214	0.00104513	0.000132792	0.00152046
Sambutoxin	0.800036	1.40797	0.886144	1.01682	0.663444	0.56623	0.694426	1.04282	1.09811	1.37311	1.08275	0.769208
Santalyl acetate	0.000992955	0.00310684	0.00449462	0.00175552	0.00129207	0.00211276	0.00551016	0.00293124	0.000938605	0.00284082	0.00332567	0.0041405
Sarcodon scabrosus Depsipeptide	0.00519936	0.0247636	0.00769192	0.00741708	0.00990564	0.00772135	0.0222779	0.0084209	0.00959427	0.0250004	0.023352	0.019578
Saringosterol 3-glucoside	0.000391611	0.000849103	0.00101593	0.00150155	0.00444325	0.00251371	0.00131354	0.00112741	0.00137898	0.00163409	0.00227222	0.00168006
Sarsasapogenin	0.0030034	0.0115341	0.00545019	0.00430935	0.00533424	0.00505718	0.0031782	0.00149222	0.00571455	0.00816779	0.00781599	0.00580328
S-Carboxymethylthiocysteine	0.0296303	0.0360511	0.0256264	0.0290957	0.0209893	0.0182229	0.0174791	0.017297	0.0184705	0.0148449	0.0146043	0.0152729
Schidigerasaponin F1	0.00971631	0.010981	0.0124614	0.0161959	0.00779131	0.0116607	0.00648046	0.0110089	0.0067465	0.0110245	0.00859163	0.00631436
S-Decyl GSH	0.0559646	0.0662926	0.0629545	0.0651533	0.0509716	0.0437797	0.065847	0.0536757	0.0791107	0.0580934	0.0544871	0.0618352
Sebacic acid	0.0289016	0.00785897	0.0460175	0.0167725	0.0420739	0.0450217	0.0524199	0.044177	0.0182508	0.0342738	0.0345161	0.0224315
Secoisolariciresinol 9,9'-diglucoside	0.0205148	0.0218986	0.0213253	0.0211828	0.0244277	0.0210347	0.0201315	0.024845	0.0207347	0.0166101	0.0194411	0.0192415
SEGETALIN A	0.715367	0.70457	0.730543	0.745623	1.74724	1.7748	1.78215	0.72191	0.730932	0.758296	0.796986	1.00735
Serotonin	0.045373	0.0729047	0.0664061	0.0871128	0.101061	0.0788703	0.0844375	0.100569	0.0740805	0.0717159	0.0552681	0.057599
S-Furanopetasitin	0.026852	0.0218945	0.0221614	0.0250354	0.0225661	0.0313128	0.0493853	0.051021	0.0321666	0.0287641	0.0414181	0.0266959
Shoyuflavone C	0.0140572	0.0169101	0.0182985	0.0153745	0.0114072	0.0137279	0.0243745	0.0119758	0.0146881	0.0171745	0.0115634	0.0132484
Simonin V	0.00179456	0.00172159	0.00193625	0.00154981	0.00185624	0.00145305	0.00153523	0.00102975	0.00154566	0.00148529	0.00180792	0.00124548
Sinalbin B	0.00827066	0.0112574	0.00678815	0.00906482	0.0147065	0.0144149	0.0100598	0.00586885	0.00634325	0.00390804	0.00164183	0.00409808
Sisomicin sulfate	0.00781945	0.00767097	0.00495236	0.00660056	0.00592305	0.0113081	0.0129156	0.0034775	0.00879645	0.00654812	0.00423153	0.00824618
SM(d18:0/12:0)	0.00536188	0.00408406	0.0066288	0.00709272	0.00689403	0.00573985	0.00679244	0.00694085	0.00598905	0.00624492	0.00567157	0.00708727
SM(d18:0/14:1(9Z)(OH))	0.00324773	0.0035018	0.00442287	0.00513558	0.00466858	0.00376811	0.00381905	0.0037841	0.00439459	0.00423404	0.00346939	0.00418408
SM(d18:0/16:1(9Z)(OH))	0.00426704	0.00352016	0.00545699	0.00587571	0.00756574	0.00494749	0.00920241	0.00733772	0.0044603	0.00488873	0.0061674	0.00624685
Smilagenone	0.00603381	0.00872636	0.00630249	0.00450081	0.00442887	0.00440079	0.0125089	0.00391973	0.00496524	0.00664064	0.00327803	0.00340688
Sodium 2-(bis(2-(2-(2-methyl-5-nitro-1H-imidazol-1-yl)ethoxy)-2-oxoethyl)amino)acetate	0.00268325	0.000717146	0.00119596	0.001123	0.000789245	0.00214194	0.00387201	0.00102078	0.000695151	0.000329746	0.00329421	0.000500562
Sodium pyruvate	0.00718068	0.00921395	0.00616112	0.0100446	0.00610731	0.00361586	0.00351386	0.00471412	0.00474338	0.0038738	0.0048131	0.00539963
Sorbitan oleate	0.00687729	0.00602075	0.009184	0.00890263	0.015724	0.0138374	0.00873269	0.0142809	0.00963453	0.00793713	0.0130777	0.00930314
Sorbitan, ditetradecanoate	0.00606362	0.00541712	0.00797869	0.00815607	0.00864135	0.00652644	0.00830557	0.00870476	0.00812387	0.00834758	0.00739721	0.00901329
Sovaprevir	0.0384085	0.0449649	0.0144659	0.0201154	0.026687	0.0218766	0.0383201	0.0265562	0.0139684	0.0088663	0.00985363	0.0197328
Soyasaponin II	0.00673781	0.00491946	0.00900727	0.00352811	0.00892194	0.00399692	0.00718038	0.0189999	0.00965001	0.011702	0.0011842	0.00415726
Sphinganine	0.0302782	0.0203132	0.0222892	0.0265849	0.0321643	0.0314713	0.0257415	0.0299471	0.0318969	0.0329645	0.0361312	0.0309964
Sphinganine 1-phosphate	0.00864419	0.0108724	0.0120922	0.0119566	0.0132565	0.0110603	0.0172415	0.012644	0.0204044	0.017321	0.017431	0.0189259
Sphingosine	0.0022126	0.0046221	0.00320964	0.00415955	0.00539978	0.00455515	0.00416942	0.00398089	0.00511665	0.00658854	0.00635404	0.00624171
Sphingosine 1-phosphate	0.031363	0.0324648	0.0371214	0.0413888	0.032902	0.0293114	0.0453575	0.0338386	0.0491328	0.0415703	0.0409977	0.0443781
Spinacoside C	0.00329609	0.0017268	0	0.000547404	0.00139205	0.00024364	0.00120101	0.000240943	0	0	0	0.000363823
Spisulosine	0.00222053	0.00159572	0.00193422	0.00176572	0.00391841	0.00200612	0.00192723	0.00440338	0.00203527	0.00198644	0.00193301	0.00172426
S-Propyl 1-propanesulfinothioate	0.0214442	0.0146847	0.0175512	0.0155545	0.00832856	0.00544957	0.0280234	0.0211609	0.0102233	0.00581725	0.0139658	0.00106502
Squalamine	0.0169168	0.0222932	0.0237169	0.0229883	0.0184318	0.0176909	0.0201889	0.0253271	0.0264427	0.0227261	0.0239783	0.0245861
ST50977403	0.0105503	0.000953059	0.00484097	0.00503146	0.00357454	0.0096418	0.00890809	0.000959386	0.000616459	0.00619855	0.00739403	0.00628366
ST50990780	0.0220052	0.0387673	0.0286429	0.0319526	0.0251396	0.0285174	0.0289334	0.0254539	0.0250351	0.0225094	0.0190937	0.0312455
Stearic acid	0.0341287	0.0352224	0.0519193	0.0315632	0.0233798	0.0287717	0.0246833	0.0354291	0.042911	0.0349405	0.029587	0.0254513
Stearic acid diethanolamine salt	0.00189732	0.00125662	0.00148544	0.00220838	0.00207846	0.00280443	0.0019355	0.00212579	0.00231445	0.00235031	0.00410192	0.00260558
Stearic acid, compound with diethylamine (1:1)	0.0151148	0.0141035	0.0215865	0.0144681	0.0277134	0.0138088	0.0147042	0.0470057	0.022978	0.0196745	0.0164206	0.0177171
Stearoylcarnitine	0.0134172	0.0107841	0.0128174	0.0128071	0.00968505	0.00989235	0.0132897	0.0225204	0.0136437	0.012763	0.011597	0.0125946
Steviobioside	0.023572	0.0242624	0.0214415	0.0286759	0.0302487	0.0219054	0.0216304	0.0667943	0.0186345	0.0214647	0.0187314	0.0268487
Stigmastanol	0.00138837	0.00341272	0.00484202	0.00546794	0.00552387	0.00368284	0.00459238	0.00535726	0.00504949	0.00481759	0.00448678	0.00524179
Streptomycin sulfate (2:3)	0.0114272	0.0108986	0.0195243	0.0124896	0.0120341	0.0102844	0.0149955	0.0136824	0.00753338	0.0146364	0.0120967	0.00686366
Succinic acid, compound with 2-(4-(3-(dibutylamino)propoxy)-3,5-dimethylbenzoyl)-4H-1-benzopyran-4-one (1:1)	0.076872	0.0839397	0.0498437	0.0639215	0.0525551	0.0578893	0.0466923	0.0454495	0.0458359	0.0329656	0.0450317	0.067219
Sulfanilamide	0.0463135	0.04169	0.0359558	0.0306408	0.0534134	0.0733639	0.0479235	0.0693731	0.0850604	0.0948065	0.0755316	0.0656078
Sulfaphenazole	0.0164462	0.0140201	0.00698905	0.00918092	0.00295391	0.00221757	0.0309665	0.00705106	0.00335776	0.00164686	0.00682952	0.000299968
Sulfite, hydrogen	0.0375109	0.0623091	0.0511972	0.0980022	0.0615056	0.0643454	0.0427184	0.0599363	0.0730278	0.10049	0.0435107	0.0430274
Sulfomyxin	0.231314	0.187616	0.139965	0.192625	0.21469	0.203428	0.218973	0.208303	0.178429	0.218524	0.268718	0.292913
Sulforaphane-cysteine-glycine	0.00167169	0.000300817	0.000738525	0.000520194	0.000481656	0.00104338	0.00172501	0.000547324	0.000301195	0.000187979	0.00180302	0.000242013
Sulforaphane-glutathione	0.0458117	0.0422703	0.0336041	0.0308036	0.0243962	0.0681233	0.110256	0.0309406	0.016207	0.0132289	0.12436	0.0146527
Sulfoxone	0.00242712	0.0144274	0.014974	0.0100905	0.0119639	0.0107094	0.0105051	0.0191511	0.0118987	0.00898209	0.0110568	0.0191969
Sulfuric acid--N-propanoylleucyl-N-{5-[(diaminomethylidene)amino]-1-oxopentan-2-yl}leucinamide (1/2)	0.00153824	0.00225048	0.00575739	0.00289812	0.000451424	0.00105316	0.00125621	0.00108141	0.00111707	0.00343509	0.00175763	0.00209423
Sumatriptan	0.0108384	0.0104601	0.00937501	0.00965488	0.00839978	0.00750325	0.00699395	0.00855001	0.00741938	0.00809958	0.00868628	0.00821229
Suprofen	0	0.000474172	0.000399271	0.000335105	9.35e-05	0.000549065	0.00113655	0.000438451	0.000108671	6.3e-05	0.0012936	0.000176366
Suramin	0.0080907	0.00777104	0.00496594	0.00739388	0.00668213	0.0112581	0.0135273	0.00355613	0.00807001	0.00652771	0.00432721	0.00766973
Swertiajaponin	0.00261845	0.00258847	0.00233956	0.00220465	0.00186239	0.00450917	0.00793619	0.00179407	0.00112946	0.000916662	0.00772808	0.001035
Syriacin	0.00237991	0.000250377	0.00129927	0.00166146	0.00217735	0.000164862	0.00310782	0.00449108	0	0.00243285	0.0023321	0.00275676
T140 peptide	0.00605594	0.00512351	0.00573561	0.00340414	0.00636422	0.00845315	0.00708879	0.0060093	0.0087146	0.00406989	0.0012625	0.00389461
Tanakamine	0.00115739	0.0013542	0.00101418	0.000592725	0.00207983	0.00292968	0.00120067	0.00212627	0.00160567	0.00196516	0.00166615	0.00212771
Taurine	0.0149098	0.0216228	0.0216468	0.0339737	0.0241712	0.0208669	0.022454	0.0221955	0.0157514	0.0209115	0.0147866	0.0128908
Taurocholic acid	0.0752146	0.0494192	0.0378173	0.0346573	0.0381474	0.0452426	0.0567752	0.0898532	0.046303	0.123284	0.0257204	0.388931
Taurocholic acid 3-sulfate	0.0148863	0.0151934	0.0142915	0.0143641	0.0130357	0.0124835	0.0121185	0.0130367	0.01166	0.0126474	0.0129648	0.0125365
Telaprevir	0	0.000179151	0.000954608	0.00102683	0.00121559	0.000236295	0.00112725	0.00147397	0.00047227	0.000759352	0.000936297	0.0009405
Temocaprilat	0.000876422	0.00130648	0.000946787	0.000712947	0.000626095	0.00170206	0.00304108	0.000764611	0.000255431	0.00031036	0.00315217	0.000629116
Temsirolimus	0.00401994	0.00405216	0.00588777	0.00484477	0.00107635	0.00244204	0.00182653	0.00283804	0.00428867	0.0100058	0.00633811	0.00645193
Terazosin	0.00107016	0.000801039	0.000319758	0.000911083	0.000409191	0.00101771	0.00140324	0.00109621	0.00111526	0.000693132	0.000854212	0.000562228
Terbinafine	0.00284666	0.002696	0.00245094	0.00286222	0.00342341	0.00356376	0.00321964	0.00508215	0.00546119	0.00516429	0.00578333	0.00626781
Terbutaline	0.00432953	0.00277152	0.00361307	0.00401519	0.00290478	0.00264343	0.00416463	0.00630358	0.00571964	0.0114197	0.00487388	0.00300586
Ternatin C1	0.0103259	0.0103671	0.00408846	0.00719395	0.00413492	0.00907579	0.00825343	0.00364407	0.00860178	0.00473978	0.00371871	0.00795212
Ternatin C4	0.00314381	0.00284258	0.00181825	0.0025796	0.00176985	0.00361324	0.00310098	0.00176064	0.00279326	0.00243805	0.00138867	0.00257353
tert-Butyl 4-(3-aminopropyl)piperazine-1-carboxylate	0.0186783	0.0148793	0.022818	0.0176084	0.0124613	0.0182067	0.0138351	0.032807	0.0101069	0.0114542	0.00974462	0.0125843
tert-Butyl 4-{methyl[2-(pyridin-2-yl)ethyl]amino}piperidine-1-carboxylate	0.0351791	0.0255821	0.0455284	0.0276929	0.00728765	0.0366211	0.0336185	0.0466785	0.0142312	0.0355377	0.0263331	0.0339478
tert-Butylcalix[4]arene-tetrakis(N,N-dimethylacetamide)	0.00471495	0.0035399	0.00180048	0.00278347	0.00471039	0.00508645	0.00267024	0.00382973	0.00180124	0.000882904	0.00231056	0.00325887
tert-Butyloxycarbonyl-valyl-alanyl-leucyl-2-aminoisobutyryl-valyl-alanyl-leucyl methyl ester	0.008209	0.0100333	0.00598348	0.00606918	0.00325554	0.00356486	0.00572641	0.00878384	0.00878712	0.00321073	0.00912737	0.00925307
Testosterone enanthate	0.000105648	0.000597274	0.00125637	0.000426572	0.0011842	0.000863731	0.00183792	0.000141075	0.00178862	0.000915347	0.00147219	0.00210619
Tetra(decyl)ammonium lauryl sarcosinate	0.00215835	0.00302174	0.00290851	0.00308285	0.00675335	0.00546436	0.00165286	0.00681322	0.00303494	0.00273648	0.00191901	0.00360353
Tetracaesium 2,2',2'',2'''-[ethane-1,2-diylbis(oxy-2,1-phenylenenitrilo)]tetraacetate	0.00505546	0.00610426	0.00798931	0.0055099	0.00488093	0.00389287	0.0045189	0.0065645	0.00619321	0.00865817	0.00616377	0.00752607
Tetracosatetraenoyl carnitine	0.321211	0.395841	0.459167	0.407558	0.327769	0.311946	0.343562	0.0630921	0.0787707	0.0574937	0.428973	0.456558
Tetradecanedioic acid	0.00875266	0.0119835	0.00834902	0.00837699	0.0136707	0.0126866	0.00908779	0.0154505	0.0102118	0.00834889	0.0134844	0.00981068
Tetradecanoic acid, compd. with 2,2'-iminobis[ethanol] (1:1)	0.0128941	0.00181774	0.00254485	0.00864872	0.00238787	0.00360385	0.00390828	0.0110815	0.0024573	0.00293011	0.00633826	0.00336987
Tetradecanoylcarnitine	0.0736499	0.0855829	0.0862457	0.0950937	0.106488	0.110061	0.118495	0.168041	0.185913	0.193987	0.203473	0.222597
Tetraethylene glycol	0.00726729	0.0104761	0.00712965	0.00800782	0.00917715	0.0212351	0.0108219	0.0116765	0.00920196	0.00714782	0.0323623	0.0126937
Tetraethylene glycol monododecyl ether	0.00495046	0.00577112	0.00534899	0.00574851	0.0122078	0.0112419	0.00846685	0.00653361	0.0104171	0.00931202	0.00924219	0.00614105
TetraHCA	0.00161071	0.000793419	0.002706	0.00225184	0.00110224	0.000947518	0.00106855	0.00239845	0.00223715	0.00188833	0.00178396	0.00154787
Tetrahydrocorticosterone	0.105645	0.0877213	0.103248	0.0669055	0.0742357	0.117966	0.0823862	0.121974	0.0970597	0.12598	0.100695	0.101345
Tetrahydrodeoxycorticosterone	0	0.000961943	0.00173577	0.000450948	0.00121941	0.000838489	0.00247167	0.0003873	0.0018521	0.000702594	0.00184835	0.00298344
Tetrahydrofolyl-[Glu](2)	0.027198	0.00881396	0.0351254	0.0271922	0.0127938	0.0326589	0.0377974	0.0272494	0.0113697	0.0317881	0.0302168	0.0480496
Tetraoctyl imidodiphosphate	0.00560012	0.00574872	0.00514186	0.00488391	0.00522353	0.00587058	0.00462394	0.006459	0.00436469	0.00370479	0.00618039	0.00595562
Tetrapotassium 2-[4-{5-[2-(2,5-disulfonatophenyl)-5-(ethoxycarbonyl)-3-oxo-2,3-dihydro-1H-pyrazol-4-yl]penta-2,4-dien-1-ylidene}-3-(ethoxycarbonyl)-5-oxo-4,5-dihydro-1H-pyrazol-1-yl]benzene-1,4-disulf	0.0703374	0.0593433	0.0727563	0.0723715	0.0762511	0.0719329	0.0736027	0.0588213	0.0516569	0.052757	0.0532504	0.0607507
Tetrapropylammonium	0.0130644	0.0128423	0.00920696	0.0142613	0.00847755	0.0119276	0.0126866	0.00738163	0.0107499	0.013573	0.0165306	0.0146089
Tetratriacontanal	0.0016177	0.001425	0.00226769	0.00226568	0.000105116	0.000221213	0.000197649	0.000991787	0.00177893	0.0028741	0.00129667	0.00168313
TG(14:/2:1(11Z)/O-18:)	0.00519213	0.0075442	0.0128521	0.00876495	0.00590592	0.0069263	0.0103886	0.0110988	0.0155491	0.0204892	0.0158141	0.0107708
TG(14:0/20:1(11Z)/O-18:0)	0.0577519	0.0710798	0.0884282	0.0835517	0.054816	0.0634745	0.0799762	0.081102	0.100361	0.116931	0.104696	0.0767834
TG(14:1(9Z)/18:4(6Z,9Z,12Z,15Z)/18:4(6Z,9Z,12Z,15Z))	0.00158711	0.00182095	0.00223819	0.00254481	0.00649794	0.00329414	0.00293998	0.00199657	0.00254629	0.00258115	0.00358512	0.00333098
TG(15:0/18:0/24:1(15Z))	0.0155879	0.0141688	0.015621	0.0151775	0.0165687	0.0172822	0.0157942	0.013051	0.0110187	0.0119076	0.0127347	0.0151388
TG(15:0/20:0/O-18:0)	0.0201832	0.0162444	0.0190378	0.0154449	0.0189576	0.0183968	0.0197879	0.0157847	0.0150126	0.0136959	0.0136697	0.0162458
TG(15:0/22:1(13Z)/22:6(4Z,7Z,10Z,13Z,16Z,19Z))	0.00420533	0.00347465	0.00467664	0.00474665	0.00439765	0.00391952	0.0041251	0.00435509	0.00442952	0.00461822	0.00435892	0.0054195
TG(18:4(6Z,9Z,12Z,15Z)/20:5(5Z,8Z,11Z,14Z,17Z)/18:4(6Z,9Z,12Z,15Z))	0.00702664	0.00404407	0.009555	0.00297042	0.0102541	0.00443109	0.00771002	0.0187149	0.00912587	0.0109515	0.0013417	0.00308504
TG(20:1(11Z)/22:6(4Z,7Z,10Z,13Z,16Z,19Z)/20:1(11Z))	0.00168881	0.00126692	0.00155377	0.00163865	0.00160277	0.00135492	0.00118915	0.00138868	0.00156996	0.00132986	0.00165681	0.0014504
TG(20:4(5Z,8Z,11Z,14Z)/22:6(4Z,7Z,10Z,13Z,16Z,19Z)/O-18:0)	0.00143926	0.00139086	0.00128126	0.00155812	0.00184588	0.00165889	0.00147	0.00116888	0.00162929	0.00138601	0.00143241	0.00151538
TG(20:5(5Z,8Z,11Z,14Z,17Z)/22:6(4Z,7Z,10Z,13Z,16Z,19Z)/20:5(5Z,8Z,11Z,14Z,17Z))	0.497595	0.538425	0.519173	0.524701	0.407956	0.41962	0.409173	0.492473	0.481389	0.556275	0.609526	0.571039
TG(21:0/22:6(4Z,7Z,10Z,13Z,16Z,19Z)/22:6(4Z,7Z,10Z,13Z,16Z,19Z))[iso3]	0.00447552	0.00450821	0.00378286	0.00433093	0.00496423	0.00392279	0.00416071	0.00393996	0.00449342	0.00411348	0.00427463	0.00449968
TG(22:1(13Z)/19:2n6/22:6(4Z,7Z,10Z,13Z,16Z,19Z))	0.0116739	0.0108851	0.0124974	0.0126631	0.0149511	0.0142696	0.0127245	0.0106813	0.00934172	0.00967071	0.00920817	0.0100397
TG(22:2(13Z,16Z)/15:0/22:2(13Z,16Z))	0.00549465	0.00491739	0.00562121	0.00497627	0.00572056	0.00549154	0.00492679	0.00507148	0.00582122	0.00505045	0.00536057	0.00545945
TG(22:4(7Z,10Z,13Z,16Z)/22:5(4Z,7Z,10Z,13Z,16Z)/22:6(4Z,7Z,10Z,13Z,16Z,19Z))	0.0252445	0.0322485	0.0245987	0.0282744	0.007377	0.0271653	0.00165953	0.0297298	0.0419143	0.0421041	0.0369163	0.037267
TG(22:5(4Z,7Z,10Z,13Z,16Z)/22:5(4Z,7Z,10Z,13Z,16Z)/22:5(4Z,7Z,10Z,13Z,16Z))	0.00262934	0.00730975	0.0121286	0.00789595	0.00245035	0.00124107	0.00537622	0.0105353	0.0114145	0.00549453	0.0101996	0.0090726
TG(22:5(4Z,7Z,10Z,13Z,16Z)/22:6(4Z,7Z,10Z,13Z,16Z,19Z)/22:5(4Z,7Z,10Z,13Z,16Z))	0.149674	0.249982	0.357157	0.26139	0.139554	0.134239	0.175658	0.307319	0.330111	0.22354	0.307148	0.323551
TG(22:6(4Z,7Z,10Z,13Z,16Z,19Z)/22:5(4Z,7Z,10Z,13Z,16Z)/22:6(4Z,7Z,10Z,13Z,16Z,19Z))	0.872448	1.42437	2.04123	1.5025	0.843986	0.798289	1.01513	1.75176	1.86484	1.31357	1.74259	1.85532
TG(22:6(4Z,7Z,10Z,13Z,16Z,19Z)/22:6(4Z,7Z,10Z,13Z,16Z,19Z)/22:6(4Z,7Z,10Z,13Z,16Z,19Z))	0.0608836	0.0485909	0.0469133	0.048477	0.0489541	0.0484287	0.0437399	0.0611778	0.0385983	0.0327459	0.059209	0.0557732
TG(8:0/8:0/a-13:0)[rac]	0.00608284	0.00517804	0.00786145	0.00896761	0.00809222	0.00714527	0.00813459	0.0083064	0.00827512	0.00751322	0.0076023	0.00739549
TG(8:0/8:0/i-12:0)	0.00649688	0.00841337	0.0127072	0.0122408	0.0121634	0.0103951	0.0114906	0.0120833	0.0116774	0.0124392	0.0119697	0.0124352
TG(i-20:0/10:0/10:0)	0.00110845	0.00144183	0.00180129	0.0020379	0.00119115	0.00150209	0.00117257	0.00138748	0.000957631	0.0014375	0.000738173	0.000869319
Theaflavate B	0.000193874	0	0.000830994	0.000495436	0.000388042	0.00045018	0.00188743	0.00178238	0.000234697	0	0.00201523	0.0014306
Theaflavic acid	0.00280299	0.00251841	0.00232262	0.00197605	0.0017797	0.00500851	0.00761903	0.00204352	0.00112859	0.000880221	0.00793243	0.000912865
Theogallinin	0.00687612	0.00423488	0.000301701	0.00194959	0.00320705	0.00257865	0.00318626	0.000422623	0.000207628	0	0	0.00129287
Thiabendazole	0.275505	0.26896	0.273668	0.270864	0.276955	0.274683	0.270135	0.275683	0.268376	0.271947	0.270656	0.291978
Thiocarbamic acid	0.00309214	0.00358481	0.00309673	0.0034884	0.00196331	0.00208434	0.00174233	0.00159694	0.00264394	0.00194656	0.00185848	0.00161312
Thiophene, 2,5-bis(4'-hexyl[1,1'-biphenyl]-4-yl)-	0.0843345	0.0693662	0.0495579	0.0602368	0.0676451	0.0663559	0.0548884	0.0563106	0.041017	0.0265759	0.0560118	0.0743399
Thiosulfate	0.0449568	0.0547672	0.0573986	0.0539993	0.0218097	0.0630058	0.0104903	0.066331	0.0818485	0.10013	0.0918734	0.0805393
Thiotepa	0.0274385	0.0357268	0.0247666	0.0323181	0.0408527	0.0216042	0.020301	0.0274162	0.0139169	0.0219505	0.0111696	0.0288651
Thr Tyr Glu Lys Tyr	0.0251025	0.0258934	0.0254822	0.0278818	0.0258338	0.0269771	0.027072	0.0247944	0.0257806	0.0213592	0.0278898	0.0301138
Thymidine	0.0192295	0.0244736	0.0213312	0.014595	0.014729	0.0252585	0.0506185	0.0235377	0.0163057	0.0197048	0.00855041	0.0285189
Thymine	0.00515143	0.00645744	0.00730341	0.00315877	0.00422689	0.00627401	0.0137985	0.00734265	0.00464713	0.00515313	0.00364258	0.0091816
Tiglylcarnitine	0.00506861	0.00335831	0.0076883	0.00983678	0.00297579	0.00327656	0.00421812	0.00963326	0.00579175	0.0150858	0.00875433	0.00329652
Tolcapone	0.0163976	0.0109349	0.0126421	0.0118339	0.0140185	0.022899	0.0128706	0.0143811	0.0122114	0.0189336	0.0162239	0.011425
Tolterodine	0.00443616	0.00368285	0.00525747	0.00452388	0.00456324	0.0034559	0.00607188	0.00308057	0.00442917	0.0047722	0.00387628	0.00382961
Toluene	0.0048413	0.00484019	0.00350284	0.00355887	0.00598109	0.00634011	0.00480885	0.00394843	0.00449826	0.00344344	0.00344248	0.00474632
Topotecan	0.0114946	0.0265604	0.0209055	0.0238054	0.00743747	0.0124402	0.0122292	0.0529891	0.0112542	0.0108463	0.0143309	0.0186261
Torvoside E	0.0048869	0.00582051	0.00424785	0.00402227	0.00323706	0.00211246	0.00247244	0.0011325	0.00163352	0.00124869	0.00221555	0.00105724
Torvoside G	0.041801	0.0455875	0.035131	0.0441732	0.0370941	0.0358068	0.0398307	0.0452859	0.0431251	0.0527013	0.0401973	0.0500336
Toxin T2 tetrol	0.0365654	0.000433882	0.000999176	0.0320942	0.0018365	0.0245011	0.000456385	0.0424951	0.000656264	0.00986505	0.0482561	0.00518039
Tragopogonsaponin F	0.12864	0.146841	0.147892	0.129666	0.229569	0.204637	0.099864	0.211535	0.151012	0.126804	0.111039	0.169394
trans-Hexadec-2-enoyl carnitine	0.00220712	0.00238443	0.00283296	0.00298391	0.00314322	0.00291205	0.00305975	0.00392385	0.00430549	0.00445599	0.0047695	0.004633
Tren-microgonotropen-b	0.00327325	0.00227044	0.00124615	0.00159995	0.00229614	0.00177092	0.00237219	0.000528074	0.00162608	0.00219657	0.00750811	0.00608583
Tributyl(octadecyl)phosphanium nitrate	0.0176635	0.0170181	0.0252282	0.0254911	0.0255808	0.0224564	0.0241983	0.0253774	0.0238388	0.0243136	0.0242476	0.0280668
Tricaprylyl citrate	0.0860278	0.0752692	0.105709	0.0781838	0.0730013	0.0633736	0.0736021	0.124349	0.0810296	0.063673	0.0805289	0.0929717
Trichloroethanol glucuronide	0.0087508	0.0146982	0.0160046	0.0148153	0.00278633	0.0208107	0.00131746	0.0197107	0.020001	0.0242577	0.0265896	0.0242115
Tridecanal	0.0120954	0.0151805	0.0118288	0.0110439	0.00336097	0.00439196	0.0089898	0.0111173	0.00906087	0.00533497	0.00503118	0.0142969
Tridihexethyl	0.00281206	0.00212154	0.00833065	0.00866903	0.0081376	0.0072369	0.00703958	0.0101178	0.00748508	0.00646364	0.00648388	0.00773886
Triethanolamine capryloyl glutamate	0.16018	0.185968	0.169216	0.176428	0.168329	0.168005	0.168875	0.183849	0.184076	0.202592	0.190052	0.211832
Triethyl 5,5',5''-[nitrilotris(methylene-1H-benzimidazole-2,1-diyl)]tripentanoate	0.0271201	0.0223424	0.0272331	0.0197233	0.0226035	0.0234205	0.0227724	0.0221406	0.0239459	0.0208988	0.0257498	0.0221567
Triethylene glycol	0.00436863	0.00642841	0.00444264	0.00580401	0.00550738	0.0151621	0.00537395	0.00801872	0.00663314	0.00431197	0.0262914	0.00948636
Trihexosylceramide (d18:1/16:0)	0.00874828	0.00990203	0.0111319	0.00993098	0.00367838	0.00585351	0.00673248	0.00876729	0.0102747	0.0133252	0.0120411	0.0109538
Trihexosylceramide (d18:1/22:0)	0.00550523	0.00139861	0.00169312	0.00200955	0.0029733	0.00740827	0.00419097	0.00528197	0.00780913	0.00442432	0.00285573	0.00407237
Trihexosylceramide (d18:1/24:1(15Z))	0.0412051	0.0362099	0.0482705	0.0398993	0.0482003	0.044983	0.0419572	0.0328535	0.0310695	0.032731	0.0337094	0.0388796
Trihexosylceramide (d18:1/9Z-18:1)	0.0391092	0.0526032	0.0464479	0.0403746	0.0289769	0.0331678	0.0293684	0.0404568	0.0337639	0.0308003	0.0263258	0.0344153
Triisopropanolamine	0.0646843	0.128221	0.0748053	0.0998307	0.0875253	0.0801033	0.213753	0.227937	0.214068	0.169574	0.19446	0.171757
Trimethylamine	0.00580783	0.00545427	0.00626704	0.00500866	0.00334924	0.00437849	0.00343461	0.00505447	0.00396864	0.00353981	0.00369957	0.00487641
Tripelennamine	0.00257437	0.00330758	0.00390701	0.00269605	0.00388931	0.00891164	0.00396411	0.00503514	0.00377911	0.00235472	0.0115406	0.00445618
Triphenyl[2-(triphenyldiphosphanyl)phenyl]phosphanium	0	0	0.000670939	0.000486644	0.000410458	0.00113549	0.00214437	0.000369681	0.000122163	8.05e-05	0.00158472	6.34e-05
Tripitramine	0.00254088	0.00271705	0.00217092	0.00305064	0.00214188	0.00239446	0.00288831	0.00265707	0.00362612	0.00324179	0.00298061	0.00297267
Tris(9-(2-carboxyphenyl)-3,6-bis(diethylamino)xanthylium) phosphate	0.014468	0.0178945	0.0399389	0.0266561	0.00103442	0.00458864	0.0040985	0.013939	0.0229742	0.0726631	0.0400897	0.023743
Trisodium 3,3',3''-phosphinetriyltris(benzene-1-sulphonate)	0.0239864	0.0267377	0.0234237	0.0232065	0.0216112	0.0275555	0.0151745	0.0285591	0.0228395	0.0240927	0.0219155	0.0252639
Triterpenoid	0.00236879	0.00247337	0.00886885	0.00875401	0.0095202	0.00683246	0.00821361	0.00889316	0.0081932	0.00680267	0.00796821	0.0107499
Triton X 100	0.00241515	0.0011052	0.000847855	0.00302221	0.00146751	0.00355466	0.00115992	0.00199485	0.0010037	0.00179759	0.00485391	0.00310145
Trospium	0.0948704	0.0680391	0.0930884	0.085196	0.075428	0.0649255	0.103944	0.0516836	0.0668162	0.0798833	0.0690727	0.0766405
Trypanothione	0.0221035	0.0223782	0.0147047	0.0233473	0.015698	0.0171836	0.0175028	0.017482	0.0174251	0.0155931	0.0245951	0.0258895
Tryptophanol	0.063474	0.0679683	0.0803936	0.0715724	0.04191	0.057596	0.051833	0.0706574	0.0790408	0.063712	0.0704268	0.0785408
Tubocurarine	0.01077	0.0112481	0.0121892	0.0124131	0.0128507	0.0121794	0.013291	0.0125679	0.0133973	0.0136521	0.0133121	0.0132074
Tylosin	0.00345187	0.00261998	0.00330847	0.00556294	0.00677504	0.00421907	0.00786958	0.011007	0.00383237	0.00689029	0.0078199	0.00833647
Tyr Phe Lys Ile Asp	0.0158573	0.014291	0.00991506	0.0123231	0.00936021	0.00844115	0.00647976	0.00666536	0.00899376	0.00595157	0.00860339	0.00876767
[truncated: 31 more rows]
