# Supplementary material for: A novel DNAJ protein, TCAIM, drives proteolysis of α-ketoglutarate dehydrogenase and regulates mitochondrial metabolism.
Source: Research Square preprint supplement (doi:10.21203/rs.3.rs-1236697/v1), 2022-01-21
Supplement: Supplementary file 2 [file 751bc5536b07c2b4d2a3acff.xlsx]

## Sheet: 20180402 YW
#	Visible?	Starred?	Identified Proteins (358/369)	Accession Number	Alternate ID	Molecular Weight	Protein Grouping Ambiguity	Taxonomy	YW_1.raw (F005912)	YW_2.raw (F005913)
41.2	TRUE	Empty	78 kDa glucose-regulated protein OS=Homo sapiens GN=HSPA5 PE=1 SV=2	GRP78_HUMAN		72 kDa	TRUE	unknown	0	39.604
7.2	TRUE	Empty	Keratin, type I cytoskeletal 10 OS=Homo sapiens GN=KRT10 PE=1 SV=6	K1C10_HUMAN		59 kDa	TRUE	unknown	0	37.624
67.2	TRUE	Empty	Stress-70 protein, mitochondrial OS=Homo sapiens GN=HSPA9 PE=1 SV=2	GRP75_HUMAN		74 kDa	TRUE	unknown	0	34.654
5.5	TRUE	Empty	Heat shock-related 70 kDa protein 2 OS=Homo sapiens GN=HSPA2 PE=1 SV=1	HSP72_HUMAN		70 kDa	TRUE	unknown	0	31.683
18	TRUE	Empty	Cluster of T-cell activation inhibitor, mitochondrial OS=Homo sapiens GN=TCAIM PE=2 SV=2 (sp|Q8N3R3|TCAIM_HUMAN)	sp|Q8N3R3|TCAIM_HUMAN [2]		58 kDa	TRUE	unknown	0	24.753
18.1	TRUE	Empty	T-cell activation inhibitor, mitochondrial OS=Homo sapiens GN=TCAIM PE=2 SV=2	sp|Q8N3R3|TCAIM_HUMAN		58 kDa	TRUE	unknown	0	24.753
15	TRUE	Empty	Cluster of 2-oxoglutarate dehydrogenase, mitochondrial OS=Homo sapiens GN=OGDH PE=1 SV=3 (sp|Q02218|ODO1_HUMAN)	sp|Q02218|ODO1_HUMAN [4]		116 kDa	TRUE	unknown	2.0202	22.772
15.1	TRUE	Empty	2-oxoglutarate dehydrogenase, mitochondrial OS=Homo sapiens GN=OGDH PE=1 SV=3	sp|Q02218|ODO1_HUMAN		116 kDa	TRUE	unknown	1.0101	22.772
1.12	TRUE	Empty	Keratin, type II cytoskeletal 6B OS=Homo sapiens GN=KRT6B PE=1 SV=5	K2C6B_HUMAN		60 kDa	TRUE	unknown	0	21.782
7.7	TRUE	Empty	Keratin, type I cytoskeletal 14 OS=Homo sapiens GN=KRT14 PE=1 SV=4	K1C14_HUMAN		52 kDa	TRUE	unknown	0	18.812
20	TRUE	Empty	Dihydrolipoyllysine-residue succinyltransferase component of 2-oxoglutarate dehydrogenase complex, mitochondrial OS=Homo sapiens GN=DLST PE=1 SV=4	sp|P36957|ODO2_HUMAN		49 kDa		unknown	0	18.812
1.17	TRUE	Empty	Keratin, type II cytoskeletal 6C OS=Homo sapiens GN=KRT6C PE=1 SV=3	K2C6C_HUMAN		60 kDa	TRUE	unknown	0	16.832
7.8	TRUE	Empty	Keratin, type I cytoskeletal 16 OS=Homo sapiens GN=KRT16 PE=1 SV=4	K1C16_HUMAN		51 kDa	TRUE	unknown	0	16.832
18.2	TRUE	Empty	Isoform 4 of T-cell activation inhibitor, mitochondrial OS=Homo sapiens GN=TCAIM	sp|Q8N3R3-4|TCAIM_HUMAN		41 kDa	TRUE	unknown	0	13.861
7.9	TRUE	Empty	Keratin, type I cytoskeletal 17 OS=Homo sapiens GN=KRT17 PE=1 SV=2	K1C17_HUMAN		48 kDa	TRUE	unknown	0	12.871
28	TRUE	Empty	Isoform 3 of Dihydrolipoyl dehydrogenase, mitochondrial OS=Homo sapiens GN=DLD	sp|P09622-3|DLDH_HUMAN (+1)		49 kDa		unknown	1.0101	8.9109
7.1	TRUE	Empty	Keratin, type I cytoskeletal 27 OS=Homo sapiens GN=KRT27 PE=1 SV=2	K1C27_HUMAN		50 kDa	TRUE	unknown	0	7.9208
54	TRUE	Empty	Cartilage-associated protein OS=Homo sapiens GN=CRTAP PE=1 SV=1	CRTAP_HUMAN		47 kDa	TRUE	unknown	0	7.9208
103	TRUE	Empty	Heterogeneous nuclear ribonucleoprotein H OS=Homo sapiens GN=HNRNPH1 PE=1 SV=4	HNRH1_HUMAN		49 kDa	TRUE	unknown	0	6.9307
1.1	TRUE	Empty	Keratin, type II cytoskeletal 7 OS=Homo sapiens GN=KRT7 PE=1 SV=5	K2C7_HUMAN (+1)		51 kDa	TRUE	unknown	1.0101	5.9406
15.2	TRUE	Empty	Isoform 2 of 2-oxoglutarate dehydrogenase-like, mitochondrial OS=Homo sapiens GN=OGDHL	sp|Q9ULD0-2|OGDHL_HUMAN (+2)		108 kDa	TRUE	unknown	2.0202	5.9406
60	TRUE	Empty	Isoform 2 of ATP-dependent RNA helicase DDX3X OS=Homo sapiens GN=DDX3X	sp|O00571-2|DDX3X_HUMAN		71 kDa		unknown	0	5.9406
97.2	TRUE	Empty	DnaJ homolog subfamily C member 8 OS=Homo sapiens GN=DNAJC8 PE=1 SV=2	DNJC8_HUMAN		30 kDa	TRUE	unknown	0	5.9406
1.6	TRUE	Empty	Isoform 2 of Keratin, type II cytoskeletal 80 OS=Homo sapiens GN=KRT80	sp|Q6KB66-2|K2C80_HUMAN (+2)		47 kDa	TRUE	unknown	2.0202	4.9505
1.18	TRUE	Empty	SWISS-PROT:Q3TTY5 Tax_Id=10090 Gene_Symbol=Krt2 Keratin, type II cytoskeletal 2 epidermal	Q3TTY5		?	TRUE	unknown	0	4.9505
1.19	TRUE	Empty	SWISS-PROT:Q9DCV7 Tax_Id=10090 Gene_Symbol=Krt7 Keratin, type II cytoskeletal 7	Q9DCV7		?	TRUE	unknown	0	4.9505
7.11	TRUE	Empty	SWISS-PROT:P19001 Tax_Id=10090 Gene_Symbol=Krt19 Keratin, type I cytoskeletal 19	P19001		?	TRUE	unknown	0	4.9505
29.2	TRUE	Empty	Isoform 2 of Polyadenylate-binding protein 4 OS=Homo sapiens GN=PABPC4	sp|Q13310-2|PABP4_HUMAN (+2)		70 kDa	TRUE	unknown	0	4.9505
70	TRUE	Empty	Cluster of Isoform 2 of Ataxin-2-like protein OS=Homo sapiens GN=ATXN2L (sp|Q8WWM7-2|ATX2L_HUMAN)	sp|Q8WWM7-2|ATX2L_HUMAN [8]		112 kDa	TRUE	unknown	1.0101	3.9604
70.1	TRUE	Empty	Isoform 2 of Ataxin-2-like protein OS=Homo sapiens GN=ATXN2L	sp|Q8WWM7-2|ATX2L_HUMAN (+6)		112 kDa	TRUE	unknown	1.0101	3.9604
70.2	TRUE	Empty	Ataxin-2-like protein OS=Homo sapiens GN=ATXN2L PE=1 SV=2	sp|Q8WWM7|ATX2L_HUMAN		113 kDa	TRUE	unknown	0	3.9604
78	TRUE	Empty	Isoform 2 of Pleiotropic regulator 1 OS=Homo sapiens GN=PLRG1	sp|O43660-2|PLRG1_HUMAN		56 kDa		unknown	1.0101	3.9604
85	TRUE	Empty	Cluster of Dermcidin OS=Homo sapiens GN=DCD PE=1 SV=2 (sp|P81605|DCD_HUMAN)	sp|P81605|DCD_HUMAN [2]		11 kDa	TRUE	unknown	2.0202	3.9604
85.1	TRUE	Empty	Dermcidin OS=Homo sapiens GN=DCD PE=1 SV=2	sp|P81605|DCD_HUMAN		11 kDa	TRUE	unknown	2.0202	3.9604
85.2	TRUE	Empty	Isoform 2 of Dermcidin OS=Homo sapiens GN=DCD	sp|P81605-2|DCD_HUMAN		12 kDa	TRUE	unknown	0	3.9604
87	TRUE	Empty	Isoform Gamma-2 of Serine/threonine-protein phosphatase PP1-gamma catalytic subunit OS=Homo sapiens GN=PPP1CC	sp|P36873-2|PP1G_HUMAN (+1)		39 kDa		unknown	1.0101	3.9604
88	TRUE	Empty	Isoform 2 of PEST proteolytic signal-containing nuclear protein OS=Homo sapiens GN=PCNP	sp|Q8WW12-2|PCNP_HUMAN (+1)		14 kDa		unknown	1.0101	3.9604
100	TRUE	Empty	28S ribosomal protein S36, mitochondrial OS=Homo sapiens GN=MRPS36 PE=1 SV=2	RT36_HUMAN		11 kDa		unknown	0	3.9604
115	TRUE	Empty	RNA-binding protein 14 OS=Homo sapiens GN=RBM14 PE=1 SV=2	RBM14_HUMAN		69 kDa		unknown	0	3.9604
117	TRUE	Empty	Isoform 2 of Heterogeneous nuclear ribonucleoprotein H3 OS=Homo sapiens GN=HNRNPH3	sp|P31942-2|HNRH3_HUMAN		35 kDa	TRUE	unknown	0	3.9604
1.23	TRUE	Empty	TREMBL:Q6ISB0 Keratin, hair, basic, 4 - Homo sapiens (Human).	Q6ISB0		?	TRUE	unknown	0	2.9703
7.13	TRUE	Empty	Keratin, type I cytoskeletal 28 OS=Homo sapiens GN=KRT28 PE=1 SV=2	K1C28_HUMAN		51 kDa	TRUE	unknown	0	2.9703
57	TRUE	Empty	Mitochondrial 2-oxoglutarate/malate carrier protein OS=Homo sapiens GN=SLC25A11 PE=1 SV=3	sp|Q02978|M2OM_HUMAN		34 kDa		unknown	2.0202	2.9703
59	TRUE	Empty	40S ribosomal protein SA OS=Homo sapiens GN=RPSA PE=1 SV=4	RSSA_HUMAN		33 kDa		unknown	2.0202	2.9703
73	TRUE	Empty	BAG family molecular chaperone regulator 3 OS=Homo sapiens GN=BAG3 PE=1 SV=3	BAG3_HUMAN		62 kDa		unknown	0	2.9703
86	TRUE	Empty	Replication protein A 70 kDa DNA-binding subunit OS=Homo sapiens GN=RPA1 PE=1 SV=2	RFA1_HUMAN		68 kDa		unknown	0	2.9703
98	TRUE	Empty	Isoform 2 of Heterogeneous nuclear ribonucleoprotein A/B OS=Homo sapiens GN=HNRNPAB	sp|Q99729-2|ROAA_HUMAN (+1)		36 kDa		unknown	0	2.9703
101	TRUE	Empty	RNA-binding protein FUS OS=Homo sapiens GN=FUS PE=1 SV=1	sp|P35637|FUS_HUMAN		53 kDa		unknown	0	2.9703
116	TRUE	Empty	Isoform 2 of Heterogeneous nuclear ribonucleoprotein A3 OS=Homo sapiens GN=HNRNPA3	sp|P51991-2|ROA3_HUMAN (+1)		37 kDa	TRUE	unknown	0	2.9703
126	TRUE	Empty	Cluster of Peroxiredoxin-1 OS=Homo sapiens GN=PRDX1 PE=1 SV=1 (PRDX1_HUMAN)	PRDX1_HUMAN [2]		22 kDa	TRUE	unknown	0	2.9703
126.1	TRUE	Empty	Peroxiredoxin-1 OS=Homo sapiens GN=PRDX1 PE=1 SV=1	PRDX1_HUMAN		22 kDa	TRUE	unknown	0	2.9703
127	TRUE	Empty	Cleavage and polyadenylation specificity factor subunit 5 OS=Homo sapiens GN=NUDT21 PE=1 SV=1	CPSF5_HUMAN		26 kDa	TRUE	unknown	0	2.9703
1	TRUE	Empty	Cluster of Keratin, type II cytoskeletal 1 OS=Homo sapiens GN=KRT1 PE=1 SV=6 (K2C1_HUMAN)	K2C1_HUMAN [34]		66 kDa	TRUE	unknown	144.44	132.67
5	TRUE	Empty	Cluster of Heat shock cognate 71 kDa protein OS=Homo sapiens GN=HSPA8 PE=1 SV=1 (sp|P11142|HSP7C_HUMANHeat shock cognate 71 kDa protein OS=Homo sapiens GN=HSPA8 PE=1 SV=1)	sp|P11142|HSP7C_HUMANHeat shock cognate 71 kDa protein OS=Homo sapiens GN=HSPA8 PE=1 SV=1 [9]		?	TRUE	unknown	69.697	85.149
1.1	TRUE	Empty	Keratin, type II cytoskeletal 1 OS=Homo sapiens GN=KRT1 PE=1 SV=6	K2C1_HUMAN		66 kDa	TRUE	unknown	97.979	80.198
7	TRUE	Empty	Cluster of SWISS-PROT:P13645 Tax_Id=9606 Gene_Symbol=KRT10 Keratin, type I cytoskeletal 10 (sp|P13645|K1C10_HUMANKeratin, type I cytoskeletal 10 OS=Homo sapiens GN=KRT10 PE=1 SV=6)	sp|P13645|K1C10_HUMANKeratin, type I cytoskeletal 10 OS=Homo sapiens GN=KRT10 PE=1 SV=6 [18]		?	TRUE	unknown	75.757	62.376
6	TRUE	Empty	ADP/ATP translocase 3 OS=Homo sapiens GN=SLC25A6 PE=1 SV=4	ADT3_HUMAN		33 kDa	TRUE	unknown	78.788	59.406
5.2	TRUE	Empty	Isoform 2 of Heat shock cognate 71 kDa protein OS=Homo sapiens GN=HSPA8	sp|P11142-2|HSP7C_HUMAN		54 kDa	TRUE	unknown	38.384	55.446
2	TRUE	Empty	Cluster of Actin, alpha cardiac muscle 1 OS=Homo sapiens GN=ACTC1 PE=1 SV=1 (ACTC_HUMAN)	ACTC_HUMAN [11]		42 kDa	TRUE	unknown	63.636	54.456
2.1	TRUE	Empty	Actin, alpha cardiac muscle 1 OS=Homo sapiens GN=ACTC1 PE=1 SV=1	ACTC_HUMAN		42 kDa	TRUE	unknown	58.586	47.525
5.4	TRUE	Empty	Isoform 2 of Heat shock 70 kDa protein 1A OS=Homo sapiens GN=HSPA1A	sp|P0DMV8-2|HS71A_HUMAN		64 kDa	TRUE	unknown	31.313	43.565
41	TRUE	Empty	Cluster of 78 kDa glucose-regulated protein OS=Homo sapiens GN=HSPA5 PE=1 SV=2 (sp|P11021|GRP78_HUMAN78 kDa glucose-regulated protein OS=Homo sapiens GN=HSPA5 PE=1 SV=2)	sp|P11021|GRP78_HUMAN78 kDa glucose-regulated protein OS=Homo sapiens GN=HSPA5 PE=1 SV=2 [2]		?	TRUE	unknown	38.384	39.604
4	TRUE	Empty	Keratin, type I cytoskeletal 9 OS=Homo sapiens GN=KRT9 PE=1 SV=3	K1C9_HUMAN		62 kDa	TRUE	unknown	38.384	36.634
67	TRUE	Empty	Cluster of Stress-70 protein, mitochondrial OS=Homo sapiens GN=HSPA9 PE=1 SV=2 (sp|P38646|GRP75_HUMANStress-70 protein, mitochondrial OS=Homo sapiens GN=HSPA9 PE=1 SV=2)	sp|P38646|GRP75_HUMANStress-70 protein, mitochondrial OS=Homo sapiens GN=HSPA9 PE=1 SV=2 [2]		?	TRUE	unknown	37.374	34.654
1.2	TRUE	Empty	Keratin, type II cytoskeletal 2 epidermal OS=Homo sapiens GN=KRT2 PE=1 SV=2	K22E_HUMAN		65 kDa	TRUE	unknown	32.323	31.683
2.3	TRUE	Empty	Actin, alpha skeletal muscle OS=Homo sapiens GN=ACTA1 PE=1 SV=1	ACTS_HUMAN		42 kDa	TRUE	unknown	32.323	27.723
3	TRUE	Empty	Cluster of Myosin-6 OS=Homo sapiens GN=MYH6 PE=1 SV=5 (MYH6_HUMAN)	MYH6_HUMAN [6]		224 kDa	TRUE	unknown	49.495	26.733
3.1	TRUE	Empty	Myosin-6 OS=Homo sapiens GN=MYH6 PE=1 SV=5	MYH6_HUMAN		224 kDa	TRUE	unknown	48.485	26.733
13	TRUE	Empty	Isoform 2 of ATP synthase F(0) complex subunit C2, mitochondrial OS=Homo sapiens GN=ATP5G2	sp|Q06055-2|AT5G2_HUMAN (+4)		21 kDa		unknown	23.232	25.743
11	TRUE	Empty	SWISS-PROT:P02769 (Bos taurus) Bovine serum albumin precursor	P02769		?	TRUE	unknown	12.121	23.762
2.2	TRUE	Empty	Actin, cytoplasmic 1 OS=Homo sapiens GN=ACTB PE=1 SV=1	ACTB_HUMAN (+2)		42 kDa	TRUE	unknown	23.232	22.772
8	TRUE	Empty	Isoform Ex1A-2-3 of AMP deaminase 2 OS=Homo sapiens GN=AMPD2	sp|Q01433-2|AMPD2_HUMAN		92 kDa	TRUE	unknown	13.131	20.792
14	TRUE	Empty	Peptidyl-prolyl cis-trans isomerase B OS=Homo sapiens GN=PPIB PE=1 SV=2	PPIB_HUMAN		24 kDa		unknown	13.131	19.802
56	TRUE	Empty	Cluster of ADP/ATP translocase 1 OS=Homo sapiens GN=SLC25A4 PE=1 SV=4 (ADT1_HUMAN)	ADT1_HUMAN [2]		33 kDa	TRUE	unknown	36.363	17.822
56.1	TRUE	Empty	ADP/ATP translocase 1 OS=Homo sapiens GN=SLC25A4 PE=1 SV=4	ADT1_HUMAN		33 kDa	TRUE	unknown	34.343	16.832
12	TRUE	Empty	ATP synthase subunit beta, mitochondrial OS=Homo sapiens GN=ATP5B PE=1 SV=3	ATPB_HUMAN		57 kDa		unknown	28.283	15.842
56.2	TRUE	Empty	ADP/ATP translocase 2 OS=Homo sapiens GN=SLC25A5 PE=1 SV=7	ADT2_HUMAN		33 kDa	TRUE	unknown	35.353	15.842
1.3	TRUE	Empty	Keratin, type II cytoskeletal 5 OS=Homo sapiens GN=KRT5 PE=1 SV=3	K2C5_HUMAN		62 kDa	TRUE	unknown	15.151	14.852
10	TRUE	Empty	SWISS-PROT:P00761|TRYP_PIG Trypsin - Sus scrofa (Pig).	P00761		?		unknown	24.242	11.881
29	TRUE	Empty	Cluster of Isoform 2 of Polyadenylate-binding protein 1 OS=Homo sapiens GN=PABPC1 (sp|P11940-2|PABP1_HUMAN)	sp|P11940-2|PABP1_HUMAN [6]		61 kDa	TRUE	unknown	3.0303	11.881
16	TRUE	Empty	Isoform 3 of ATP synthase subunit alpha, mitochondrial OS=Homo sapiens GN=ATP5A1	sp|P25705-3|ATPA_HUMAN (+1)		58 kDa		unknown	23.232	10.891
32	TRUE	Empty	Cluster of Isoform 3 of E3 ubiquitin-protein ligase TRIM11 OS=Homo sapiens GN=TRIM11 (sp|Q96F44-3|TRI11_HUMAN)	sp|Q96F44-3|TRI11_HUMAN [2]		53 kDa	TRUE	unknown	4.0404	10.891
32.1	TRUE	Empty	Isoform 3 of E3 ubiquitin-protein ligase TRIM11 OS=Homo sapiens GN=TRIM11	sp|Q96F44-3|TRI11_HUMAN		53 kDa	TRUE	unknown	4.0404	10.891
23	TRUE	Empty	Cluster of Isoform 2 of Alpha-actinin-2 OS=Homo sapiens GN=ACTN2 (ACTN2_HUMAN)	ACTN2_HUMAN [3]		104 kDa	TRUE	unknown	14.141	9.901
23.1	TRUE	Empty	Isoform 2 of Alpha-actinin-2 OS=Homo sapiens GN=ACTN2	ACTN2_HUMAN (+1)		104 kDa	TRUE	unknown	14.141	9.901
26	TRUE	Empty	Isoform 2 of Very long-chain specific acyl-CoA dehydrogenase, mitochondrial OS=Homo sapiens GN=ACADVL	sp|P49748-2|ACADV_HUMAN (+2)		68 kDa		unknown	11.111	9.901
29.1	TRUE	Empty	Isoform 2 of Polyadenylate-binding protein 1 OS=Homo sapiens GN=PABPC1	sp|P11940-2|PABP1_HUMAN		61 kDa	TRUE	unknown	3.0303	9.901
31	TRUE	Empty	Prolyl 3-hydroxylase 1 OS=Homo sapiens GN=P3H1 PE=1 SV=2	sp|Q32P28|P3H1_HUMAN		83 kDa		unknown	5.0505	9.901
1.5	TRUE	Empty	SWISS-PROT:Q6IFZ6 Tax_Id=10090 Gene_Symbol=Krt77 Keratin, type II cytoskeletal 1b	Q6IFZ6		?	TRUE	unknown	9.0909	8.9109
22	TRUE	Empty	Voltage-dependent anion-selective channel protein 1 OS=Homo sapiens GN=VDAC1 PE=1 SV=2	sp|P21796|VDAC1_HUMANVoltage-dependent anion-selective channel protein 1 OS=Homo sapiens GN=VDAC1 PE=1 SV=2		?		unknown	14.141	8.9109
27	TRUE	Empty	Isoform A1-A of Heterogeneous nuclear ribonucleoprotein A1 OS=Homo sapiens GN=HNRNPA1	sp|P09651-2|ROA1_HUMAN (+2)		34 kDa	TRUE	unknown	4.0404	8.9109
7.12	TRUE	Empty	Isoform 3 of Keratin, type I cytoskeletal 13 OS=Homo sapiens GN=KRT13	sp|P13646-3|K1C13_HUMAN (+1)		46 kDa	TRUE	unknown	12.121	7.9208
19	TRUE	Empty	Isoform 2 of Sarcoplasmic/endoplasmic reticulum calcium ATPase 2 OS=Homo sapiens GN=ATP2A2	sp|P16615-2|AT2A2_HUMAN (+2)		110 kDa		unknown	15.151	7.9208
21	TRUE	Empty	Citrate synthase, mitochondrial OS=Homo sapiens GN=CS PE=1 SV=2	CISY_HUMAN		52 kDa		unknown	9.0909	7.9208
24	TRUE	Empty	Creatine kinase S-type, mitochondrial OS=Homo sapiens GN=CKMT2 PE=1 SV=2	KCRS_HUMAN		48 kDa		unknown	10.101	7.9208
25	TRUE	Empty	Isoform 2 of Trifunctional enzyme subunit beta, mitochondrial OS=Homo sapiens GN=HADHB	sp|P55084-2|ECHB_HUMAN (+1)		49 kDa		unknown	11.111	7.9208
39	TRUE	Empty	Isoform 3 of Heterogeneous nuclear ribonucleoprotein K OS=Homo sapiens GN=HNRNPK	sp|P61978-3|HNRPK_HUMAN		49 kDa		unknown	5.0505	7.9208
1.8	TRUE	Empty	Keratin, type II cytoskeletal 4 OS=Homo sapiens GN=KRT4 PE=1 SV=4	K2C4_HUMAN		57 kDa	TRUE	unknown	4.0404	6.9307
3.3	TRUE	Empty	Myosin-7 OS=Homo sapiens GN=MYH7 PE=1 SV=5	MYH7_HUMAN		223 kDa	TRUE	unknown	17.172	6.9307
30	TRUE	Empty	Heterogeneous nuclear ribonucleoproteins A2/B1 OS=Homo sapiens GN=HNRNPA2B1 PE=1 SV=2	sp|P22626|ROA2_HUMAN		37 kDa		unknown	5.0505	6.9307
34	TRUE	Empty	40S ribosomal protein S12 OS=Homo sapiens GN=RPS12 PE=1 SV=3	RS12_HUMAN		15 kDa		unknown	5.0505	6.9307
9	TRUE	Empty	Isoform 12 of Titin OS=Homo sapiens GN=TTN	sp|Q8WZ42-12|TITIN_HUMAN (+1)		3994 kDa		unknown	18.182	5.9406
17	TRUE	Empty	Desmoplakin OS=Homo sapiens GN=DSP PE=1 SV=3	sp|P15924|DESP_HUMAN		332 kDa		unknown	10.101	5.9406
38	TRUE	Empty	Enhancer of rudimentary homolog OS=Homo sapiens GN=ERH PE=1 SV=1	ERH_HUMAN		12 kDa		unknown	7.0707	5.9406
42	TRUE	Empty	Isoform 2 of NADH-ubiquinone oxidoreductase 75 kDa subunit, mitochondrial OS=Homo sapiens GN=NDUFS1	sp|P28331-2|NDUS1_HUMAN (+4)		81 kDa		unknown	4.0404	5.9406
50	TRUE	Empty	Isoform 2 of Aspartate aminotransferase, mitochondrial OS=Homo sapiens GN=GOT2	sp|P00505-2|AATM_HUMAN (+1)		43 kDa		unknown	5.0505	5.9406
97	TRUE	Empty	Cluster of DnaJ homolog subfamily C member 8 OS=Homo sapiens GN=DNAJC8 PE=1 SV=2 (sp|O75937|DNJC8_HUMANDnaJ homolog subfamily C member 8 OS=Homo sapiens GN=DNAJC8 PE=1 SV=2)	sp|O75937|DNJC8_HUMANDnaJ homolog subfamily C member 8 OS=Homo sapiens GN=DNAJC8 PE=1 SV=2 [2]		?	TRUE	unknown	4.0404	5.9406
33	TRUE	Empty	Probable ATP-dependent RNA helicase DDX6 OS=Homo sapiens GN=DDX6 PE=1 SV=2	DDX6_HUMAN		54 kDa		unknown	5.0505	4.9505
37	TRUE	Empty	L-lactate dehydrogenase B chain OS=Homo sapiens GN=LDHB PE=1 SV=2	LDHB_HUMAN		37 kDa		unknown	7.0707	4.9505
40	TRUE	Empty	60 kDa heat shock protein, mitochondrial OS=Homo sapiens GN=HSPD1 PE=1 SV=2	sp|P10809|CH60_HUMAN		61 kDa		unknown	3.0303	4.9505
46	TRUE	Empty	Cluster of Glycogen phosphorylase, muscle form OS=Homo sapiens GN=PYGM PE=1 SV=6 (sp|P11217|PYGM_HUMAN)	sp|P11217|PYGM_HUMAN [3]		97 kDa	TRUE	unknown	7.0707	4.9505
46.1	TRUE	Empty	Glycogen phosphorylase, muscle form OS=Homo sapiens GN=PYGM PE=1 SV=6	sp|P11217|PYGM_HUMAN		97 kDa	TRUE	unknown	7.0707	4.9505
48	TRUE	Empty	Desmoglein-1 OS=Homo sapiens GN=DSG1 PE=1 SV=2	sp|Q02413|DSG1_HUMAN		114 kDa		unknown	5.0505	4.9505
51	TRUE	Empty	Cluster of Isoform 3 of NEDD4-like E3 ubiquitin-protein ligase WWP1 OS=Homo sapiens GN=WWP1 (sp|Q9H0M0-3|WWP1_HUMAN)	sp|Q9H0M0-3|WWP1_HUMAN [8]		92 kDa	TRUE	unknown	3.0303	4.9505
51.1	TRUE	Empty	Isoform 3 of NEDD4-like E3 ubiquitin-protein ligase WWP1 OS=Homo sapiens GN=WWP1	sp|Q9H0M0-3|WWP1_HUMAN (+2)		92 kDa	TRUE	unknown	3.0303	4.9505
52	TRUE	Empty	Alpha-crystallin B chain OS=Homo sapiens GN=CRYAB PE=1 SV=2	sp|P02511|CRYAB_HUMANAlpha-crystallin B chain OS=Homo sapiens GN=CRYAB PE=1 SV=2		?		unknown	6.0606	4.9505
35	TRUE	Empty	Succinate dehydrogenase [ubiquinone] flavoprotein subunit, mitochondrial OS=Homo sapiens GN=SDHA PE=1 SV=2	sp|P31040|SDHA_HUMAN		73 kDa		unknown	6.0606	3.9604
36	TRUE	Empty	Cluster of Isoform 2 of Beta-enolase OS=Homo sapiens GN=ENO3 (sp|P13929-2|ENOB_HUMAN)	sp|P13929-2|ENOB_HUMAN [4]		44 kDa	TRUE	unknown	5.0505	3.9604
36.1	TRUE	Empty	Isoform 2 of Beta-enolase OS=Homo sapiens GN=ENO3	sp|P13929-2|ENOB_HUMAN (+2)		44 kDa	TRUE	unknown	5.0505	3.9604
46.2	TRUE	Empty	Isoform 2 of Glycogen phosphorylase, liver form OS=Homo sapiens GN=PYGL	sp|P06737-2|PYGL_HUMAN (+1)		93 kDa	TRUE	unknown	5.0505	3.9604
49	TRUE	Empty	Cluster of Isoform 2 of Spliceosome RNA helicase DDX39B OS=Homo sapiens GN=DDX39B (sp|Q13838-2|DX39B_HUMAN)	sp|Q13838-2|DX39B_HUMAN [3]		51 kDa	TRUE	unknown	3.0303	3.9604
49.1	TRUE	Empty	Isoform 2 of Spliceosome RNA helicase DDX39B OS=Homo sapiens GN=DDX39B	sp|Q13838-2|DX39B_HUMAN		51 kDa	TRUE	unknown	3.0303	3.9604
53	TRUE	Empty	Isoform 2 of Serine-threonine kinase receptor-associated protein OS=Homo sapiens GN=STRAP	sp|Q9Y3F4-2|STRAP_HUMAN		40 kDa		unknown	4.0404	3.9604
55	TRUE	Empty	Malate dehydrogenase, cytoplasmic OS=Homo sapiens GN=MDH1 PE=1 SV=4	sp|P40925|MDHC_HUMAN		36 kDa		unknown	6.0606	3.9604
66	TRUE	Empty	Prohibitin OS=Homo sapiens GN=PHB PE=1 SV=1	PHB_HUMAN		30 kDa		unknown	5.0505	3.9604
68	TRUE	Empty	Isoform B of Phosphate carrier protein, mitochondrial OS=Homo sapiens GN=SLC25A3	sp|Q00325-2|MPCP_HUMAN (+1)		40 kDa		unknown	4.0404	3.9604
89	TRUE	Empty	Isoform 3 of L-lactate dehydrogenase A chain OS=Homo sapiens GN=LDHA	sp|P00338-3|LDHA_HUMAN (+1)		40 kDa		unknown	3.0303	3.9604
110	TRUE	Empty	Serum albumin OS=Homo sapiens GN=ALB PE=1 SV=2	sp|P02768|ALBU_HUMAN (+1)		69 kDa	TRUE	unknown	3.0303	3.9604
7.3	TRUE	Empty	TREMBL:Q148H6 (Bos taurus) Hypothetical protein MGC139876	Q148H6		?	TRUE	unknown	4.0404	2.9703
43	TRUE	Empty	Keratinocyte proline-rich protein OS=Homo sapiens GN=KPRP PE=1 SV=1	KPRP_HUMAN		64 kDa		unknown	5.0505	2.9703
44	TRUE	Empty	Junction plakoglobin OS=Homo sapiens GN=JUP PE=1 SV=3	PLAK_HUMAN		82 kDa	TRUE	unknown	7.0707	2.9703
47	TRUE	Empty	Isoform M1 of Pyruvate kinase PKM OS=Homo sapiens GN=PKM	sp|P14618-2|KPYM_HUMAN		58 kDa		unknown	6.0606	2.9703
61	TRUE	Empty	Cluster of (Bos taurus) similar to alpha-tubulin I isoform 1 (ENSEMBL:ENSBTAP00000016242)	ENSEMBL:ENSBTAP00000016242 [2]		?	TRUE	unknown	3.0303	2.9703
61.1	TRUE	Empty	(Bos taurus) similar to alpha-tubulin I isoform 1	ENSEMBL:ENSBTAP00000016242		?	TRUE	unknown	3.0303	2.9703
62	TRUE	Empty	Isoform 2 of ATP-dependent 6-phosphofructokinase, muscle type OS=Homo sapiens GN=PFKM	sp|P08237-2|PFKAM_HUMAN (+2)		82 kDa		unknown	3.0303	2.9703
65	TRUE	Empty	NADH dehydrogenase [ubiquinone] iron-sulfur protein 8, mitochondrial OS=Homo sapiens GN=NDUFS8 PE=1 SV=1	sp|O00217|NDUS8_HUMANNADH dehydrogenase [ubiquinone] iron-sulfur protein 8, mitochondrial OS=Homo sapiens GN=NDUFS8 PE=1 SV=1		?		unknown	4.0404	2.9703
74	TRUE	Empty	Isoform 2 of Keratin, type II cytoskeletal 78 OS=Homo sapiens GN=KRT78	sp|Q8N1N4-2|K2C78_HUMAN (+1)		45 kDa	TRUE	unknown	6.0606	2.9703
77	TRUE	Empty	Isoform 2 of Eukaryotic translation initiation factor 5A-1 OS=Homo sapiens GN=EIF5A	IF5A1_HUMAN (+1)		20 kDa		unknown	3.0303	2.9703
90	TRUE	Empty	Heat shock protein HSP 90-beta OS=Homo sapiens GN=HSP90AB1 PE=1 SV=4	sp|P08238|HS90B_HUMANHeat shock protein HSP 90-beta OS=Homo sapiens GN=HSP90AB1 PE=1 SV=4		?	TRUE	unknown	3.0303	2.9703
1.13	TRUE	Empty	Isoform 2 of Keratin, type II cytoskeletal 72 OS=Homo sapiens GN=KRT72	sp|Q14CN4-2|K2C72_HUMAN (+2)		56 kDa	TRUE	unknown	0	1.9802
1.24	TRUE	Empty	Keratin, type II cuticular Hb2 OS=Homo sapiens GN=KRT82 PE=1 SV=3	KRT82_HUMAN		57 kDa	TRUE	unknown	0	1.9802
36.2	TRUE	Empty	Alpha-enolase OS=Homo sapiens GN=ENO1 PE=1 SV=2	sp|P06733|ENOA_HUMAN		47 kDa	TRUE	unknown	2.0202	1.9802
51.3	TRUE	Empty	Isoform 2 of NEDD4-like E3 ubiquitin-protein ligase WWP2 OS=Homo sapiens GN=WWP2	sp|O00308-2|WWP2_HUMAN (+1)		86 kDa	TRUE	unknown	0	1.9802
63	TRUE	Empty	Isoform Cytoplasmic of Fumarate hydratase, mitochondrial OS=Homo sapiens GN=FH	sp|P07954-2|FUMH_HUMAN (+1)		50 kDa		unknown	2.0202	1.9802
64	TRUE	Empty	Isoform 2 of MICOS complex subunit MIC60 OS=Homo sapiens GN=IMMT	sp|Q16891-2|MIC60_HUMAN (+3)		83 kDa		unknown	3.0303	1.9802
76	TRUE	Empty	Isoform 3 of Long-chain-fatty-acid--CoA ligase 1 OS=Homo sapiens GN=ACSL1	sp|P33121-3|ACSL1_HUMAN		78 kDa	TRUE	unknown	2.0202	1.9802
83	TRUE	Empty	Isoform MLC3 of Myosin light chain 1/3, skeletal muscle isoform OS=Homo sapiens GN=MYL1	sp|P05976-2|MYL1_HUMAN (+1)		17 kDa		unknown	1.0101	1.9802
84	TRUE	Empty	Myoglobin OS=Homo sapiens GN=MB PE=1 SV=2	MYG_HUMAN		17 kDa		unknown	4.0404	1.9802
96	TRUE	Empty	Elongation factor Tu, mitochondrial OS=Homo sapiens GN=TUFM PE=1 SV=2	EFTU_HUMAN		50 kDa		unknown	3.0303	1.9802
102	TRUE	Empty	Isoform 2 of Heterogeneous nuclear ribonucleoprotein U OS=Homo sapiens GN=HNRNPU	sp|Q00839-2|HNRPU_HUMAN		89 kDa		unknown	0	1.9802
104	TRUE	Empty	Isoform 2 of Cleavage and polyadenylation specificity factor subunit 6 OS=Homo sapiens GN=CPSF6	sp|Q16630-2|CPSF6_HUMAN (+2)		63 kDa		unknown	1.0101	1.9802
105	TRUE	Empty	Isoform 2 of Protein SEC13 homolog OS=Homo sapiens GN=SEC13	sp|P55735-2|SEC13_HUMAN (+2)		34 kDa		unknown	0	1.9802
106	TRUE	Empty	Isoform 2 of Electron transfer flavoprotein subunit alpha, mitochondrial OS=Homo sapiens GN=ETFA	sp|P13804-2|ETFA_HUMAN (+1)		30 kDa		unknown	1.0101	1.9802
114	TRUE	Empty	Cluster of Isoform 2 of Probable ATP-dependent RNA helicase DDX17 OS=Homo sapiens GN=DDX17 (sp|Q92841-1|DDX17_HUMAN)	sp|Q92841-1|DDX17_HUMAN [5]		72 kDa	TRUE	unknown	1.0101	1.9802
114.1	TRUE	Empty	Isoform 2 of Probable ATP-dependent RNA helicase DDX17 OS=Homo sapiens GN=DDX17	sp|Q92841-1|DDX17_HUMAN (+2)		72 kDa	TRUE	unknown	1.0101	1.9802
120	TRUE	Empty	Isoform 3 of Apoptosis-inducing factor 1, mitochondrial OS=Homo sapiens GN=AIFM1	sp|O95831-3|AIFM1_HUMAN (+1)		66 kDa		unknown	1.0101	1.9802
128	TRUE	Empty	Calmodulin-1 OS=Homo sapiens GN=CALM1 PE=1 SV=1	sp|P0DP23|CALM1_HUMANCalmodulin-1 OS=Homo sapiens GN=CALM1 PE=1 SV=1 (+2)		?		unknown	0	1.9802
129	TRUE	Empty	40S ribosomal protein S28 OS=Homo sapiens GN=RPS28 PE=1 SV=1	RS28_HUMAN		8 kDa		unknown	1.0101	1.9802
130	TRUE	Empty	Nucleolin OS=Homo sapiens GN=NCL PE=1 SV=3	NUCL_HUMAN		77 kDa		unknown	0	1.9802
134	TRUE	Empty	Isoform 2 of cAMP-dependent protein kinase catalytic subunit alpha OS=Homo sapiens GN=PRKACA	KAPCA_HUMAN (+1)		40 kDa		unknown	2.0202	1.9802
153	TRUE	Empty	Isoform 2 of Isocitrate dehydrogenase [NADP], mitochondrial OS=Homo sapiens GN=IDH2	sp|P48735-2|IDHP_HUMAN (+1)		45 kDa		unknown	2.0202	1.9802
161	TRUE	Empty	10 kDa heat shock protein, mitochondrial OS=Homo sapiens GN=HSPE1 PE=1 SV=2	CH10_HUMAN		11 kDa		unknown	0	1.9802
163	TRUE	Empty	Nuclear fragile X mental retardation-interacting protein 2 OS=Homo sapiens GN=NUFIP2 PE=1 SV=1	NUFP2_HUMAN		76 kDa		unknown	0	1.9802
167	TRUE	Empty	X-ray repair cross-complementing protein 5 OS=Homo sapiens GN=XRCC5 PE=1 SV=3	XRCC5_HUMAN		83 kDa		unknown	0	1.9802
180	TRUE	Empty	Isoform 2 of Delta-1-pyrroline-5-carboxylate dehydrogenase, mitochondrial OS=Homo sapiens GN=ALDH4A1	sp|P30038-2|AL4A1_HUMAN (+2)		55 kDa		unknown	1.0101	1.9802
181	TRUE	Empty	Isoform Short of Ubiquitin carboxyl-terminal hydrolase 5 OS=Homo sapiens GN=USP5	sp|P45974-2|UBP5_HUMAN (+1)		93 kDa		unknown	1.0101	1.9802
189	TRUE	Empty	Isoform 2 of BAG family molecular chaperone regulator 4 OS=Homo sapiens GN=BAG4	sp|O95429-2|BAG4_HUMAN (+1)		45 kDa		unknown	0	1.9802
191	TRUE	Empty	Isoform 2 of Heterogeneous nuclear ribonucleoprotein D0 OS=Homo sapiens GN=HNRNPD	sp|Q14103-2|HNRPD_HUMAN (+3)		36 kDa	TRUE	unknown	0	1.9802
194	TRUE	Empty	Isoform 2 of Small nuclear ribonucleoprotein Sm D3 OS=Homo sapiens GN=SNRPD3	sp|P62318-2|SMD3_HUMAN (+1)		13 kDa		unknown	0	1.9802
226	TRUE	Empty	Ras GTPase-activating protein-binding protein 1 OS=Homo sapiens GN=G3BP1 PE=1 SV=1	G3BP1_HUMAN		52 kDa		unknown	0	1.9802
1.7	TRUE	Empty	TREMBL:Q9H552 Tax_Id=9606 Gene_Symbol=- Keratin-8-like protein 1	Q9H552		?	TRUE	unknown	0	0.9901
1.9	TRUE	Empty	Vimentin OS=Homo sapiens GN=VIM PE=1 SV=4	VIME_HUMAN		54 kDa	TRUE	unknown	1.0101	0.9901
1.21	TRUE	Empty	Isoform 2 of Peripherin OS=Homo sapiens GN=PRPH	sp|P41219-2|PERI_HUMAN (+1)		54 kDa	TRUE	unknown	0	0.9901
3.2	TRUE	Empty	Myosin-4 OS=Homo sapiens GN=MYH4 PE=2 SV=2	MYH4_HUMAN		223 kDa	TRUE	unknown	2.0202	0.9901
3.6	TRUE	Empty	Myosin-13 OS=Homo sapiens GN=MYH13 PE=2 SV=2	MYH13_HUMAN		224 kDa	TRUE	unknown	0	0.9901
29.3	TRUE	Empty	Isoform 2 of Polyadenylate-binding protein 1-like OS=Homo sapiens GN=PABPC1L	sp|Q4VXU2-2|PAP1L_HUMAN		38 kDa	TRUE	unknown	0	0.9901
32.2	TRUE	Empty	Butyrophilin subfamily 1 member A1 OS=Homo sapiens GN=BTN1A1 PE=1 SV=3	BT1A1_HUMAN		59 kDa	TRUE	unknown	0	0.9901
45	TRUE	Empty	Glyceraldehyde-3-phosphate dehydrogenase OS=Homo sapiens GN=GAPDH PE=1 SV=3	sp|P04406|G3P_HUMAN		36 kDa		unknown	3.0303	0.9901
51.2	TRUE	Empty	Isoform 2 of E3 ubiquitin-protein ligase Itchy homolog OS=Homo sapiens GN=ITCH	sp|Q96J02-2|ITCH_HUMAN (+2)		99 kDa	TRUE	unknown	1.0101	0.9901
58	TRUE	Empty	Cluster of Protein argonaute-2 OS=Homo sapiens GN=AGO2 PE=1 SV=3 (sp|Q9UKV8|AGO2_HUMAN)	sp|Q9UKV8|AGO2_HUMAN [3]		97 kDa	TRUE	unknown	1.0101	0.9901
58.1	TRUE	Empty	Protein argonaute-2 OS=Homo sapiens GN=AGO2 PE=1 SV=3	sp|Q9UKV8|AGO2_HUMAN		97 kDa	TRUE	unknown	1.0101	0.9901
58.2	TRUE	Empty	Protein argonaute-1 OS=Homo sapiens GN=AGO1 PE=1 SV=3	AGO1_HUMAN		97 kDa	TRUE	unknown	1.0101	0.9901
58.3	TRUE	Empty	Protein argonaute-3 OS=Homo sapiens GN=AGO3 PE=1 SV=2	sp|Q9H9G7|AGO3_HUMAN		97 kDa	TRUE	unknown	1.0101	0.9901
69	TRUE	Empty	SWISS-PROT:P12763 (Bos taurus) Alpha-2-HS-glycoprotein precursor	P12763		?		unknown	4.0404	0.9901
71	TRUE	Empty	Cytochrome b-c1 complex subunit 1, mitochondrial OS=Homo sapiens GN=UQCRC1 PE=1 SV=3	QCR1_HUMAN		53 kDa		unknown	2.0202	0.9901
79	TRUE	Empty	Cytoplasmic dynein 1 heavy chain 1 OS=Homo sapiens GN=DYNC1H1 PE=1 SV=5	sp|Q14204|DYHC1_HUMANCytoplasmic dynein 1 heavy chain 1 OS=Homo sapiens GN=DYNC1H1 PE=1 SV=5		?		unknown	2.0202	0.9901
80	TRUE	Empty	Calcium-binding mitochondrial carrier protein Aralar1 OS=Homo sapiens GN=SLC25A12 PE=1 SV=2	sp|O75746|CMC1_HUMAN		75 kDa		unknown	3.0303	0.9901
81	TRUE	Empty	Isoform 2 of Myomesin-1 OS=Homo sapiens GN=MYOM1	MYOM1_HUMAN (+1)		178 kDa		unknown	3.0303	0.9901
91	TRUE	Empty	Prolactin-inducible protein OS=Homo sapiens GN=PIP PE=1 SV=1	PIP_HUMAN		17 kDa		unknown	2.0202	0.9901
92	TRUE	Empty	ATP-dependent RNA helicase DDX1 OS=Homo sapiens GN=DDX1 PE=1 SV=2	sp|Q92499|DDX1_HUMAN		82 kDa		unknown	0	0.9901
93	TRUE	Empty	Immunoglobulin kappa variable 2D-26 OS=Homo sapiens GN=IGKV2D-26 PE=3 SV=1	KVD26_HUMAN		13 kDa		unknown	1.0101	0.9901
95	TRUE	Empty	SWISS-PROT:Q5D862 Tax_Id=9606 Gene_Symbol=FLG2 Filaggrin-2	sp|Q5D862|FILA2_HUMANFilaggrin-2 OS=Homo sapiens GN=FLG2 PE=1 SV=1		?		unknown	1.0101	0.9901
99	TRUE	Empty	Hornerin OS=Homo sapiens GN=HRNR PE=1 SV=2	HORN_HUMAN		282 kDa		unknown	3.0303	0.9901
107	TRUE	Empty	X-ray repair cross-complementing protein 6 OS=Homo sapiens GN=XRCC6 PE=1 SV=2	sp|P12956|XRCC6_HUMAN		70 kDa		unknown	0	0.9901
108	TRUE	Empty	Peptidyl-prolyl cis-trans isomerase H OS=Homo sapiens GN=PPIH PE=1 SV=1	sp|O43447|PPIH_HUMAN		19 kDa		unknown	1.0101	0.9901
109	TRUE	Empty	Triosephosphate isomerase OS=Homo sapiens GN=TPI1 PE=1 SV=3	sp|P60174|TPIS_HUMAN		31 kDa		unknown	0	0.9901
111	TRUE	Empty	Dynein light chain 1, cytoplasmic OS=Homo sapiens GN=DYNLL1 PE=1 SV=1	DYL1_HUMAN (+1)		10 kDa		unknown	1.0101	0.9901
112	TRUE	Empty	Succinyl-CoA:3-ketoacid coenzyme A transferase 1, mitochondrial OS=Homo sapiens GN=OXCT1 PE=1 SV=1	sp|P55809|SCOT1_HUMANSuccinyl-CoA:3-ketoacid coenzyme A transferase 1, mitochondrial OS=Homo sapiens GN=OXCT1 PE=1 SV=1		?		unknown	1.0101	0.9901
113	TRUE	Empty	Isoform 2 of 26S proteasome non-ATPase regulatory subunit 2 OS=Homo sapiens GN=PSMD2	sp|Q13200-2|PSMD2_HUMAN (+2)		82 kDa		unknown	0	0.9901
114.2	TRUE	Empty	Isoform 2 of Probable ATP-dependent RNA helicase DDX5 OS=Homo sapiens GN=DDX5	sp|P17844-2|DDX5_HUMAN (+1)		61 kDa	TRUE	unknown	1.0101	0.9901
119	TRUE	Empty	Isoform 1B of Desmocollin-1 OS=Homo sapiens GN=DSC1	sp|Q08554-2|DSC1_HUMAN (+1)		94 kDa		unknown	3.0303	0.9901
121	TRUE	Empty	WD repeat-containing protein 5 OS=Homo sapiens GN=WDR5 PE=1 SV=1	WDR5_HUMAN		37 kDa		unknown	2.0202	0.9901
122	TRUE	Empty	NAD(P) transhydrogenase, mitochondrial OS=Homo sapiens GN=NNT PE=1 SV=3	NNTM_HUMAN		114 kDa		unknown	1.0101	0.9901
123	TRUE	Empty	Protein-glutamine gamma-glutamyltransferase E OS=Homo sapiens GN=TGM3 PE=1 SV=4	TGM3_HUMAN		77 kDa		unknown	1.0101	0.9901
124	TRUE	Empty	Isoform 2 of Polyadenylate-binding protein 2 OS=Homo sapiens GN=PABPN1	PABP2_HUMAN (+1)		31 kDa		unknown	1.0101	0.9901
125	TRUE	Empty	Cluster of Isoform 2 of Heterogeneous nuclear ribonucleoprotein L OS=Homo sapiens GN=HNRNPL (sp|P14866-2|HNRPL_HUMAN)	sp|P14866-2|HNRPL_HUMAN [2]		51 kDa	TRUE	unknown	0	0.9901
125.2	TRUE	Empty	Heterogeneous nuclear ribonucleoprotein L OS=Homo sapiens GN=HNRNPL PE=1 SV=2	sp|P14866|HNRPL_HUMAN		64 kDa	TRUE	unknown	0	0.9901
126.2	TRUE	Empty	Peroxiredoxin-2 OS=Homo sapiens GN=PRDX2 PE=1 SV=5	PRDX2_HUMAN		22 kDa	TRUE	unknown	0	0.9901
131	TRUE	Empty	Isoform 2 of UTP--glucose-1-phosphate uridylyltransferase OS=Homo sapiens GN=UGP2	sp|Q16851-2|UGPA_HUMAN (+1)		56 kDa		unknown	2.0202	0.9901
135	TRUE	Empty	Creatine kinase M-type OS=Homo sapiens GN=CKM PE=1 SV=2	KCRM_HUMAN		43 kDa		unknown	2.0202	0.9901
136	TRUE	Empty	Isoform 2 of Succinate-semialdehyde dehydrogenase, mitochondrial OS=Homo sapiens GN=ALDH5A1	sp|P51649-2|SSDH_HUMAN (+1)		59 kDa		unknown	2.0202	0.9901
137	TRUE	Empty	Isoform 2 of Hydroxyacyl-coenzyme A dehydrogenase, mitochondrial OS=Homo sapiens GN=HADH	sp|Q16836-2|HCDH_HUMAN (+2)		42 kDa		unknown	2.0202	0.9901
140	TRUE	Empty	Isoform 2 of Protein arginine N-methyltransferase 1 OS=Homo sapiens GN=PRMT1	sp|Q99873-2|ANM1_HUMAN (+3)		40 kDa		unknown	0	0.9901
141	TRUE	Empty	Isoform 2 of NADH dehydrogenase [ubiquinone] iron-sulfur protein 2, mitochondrial OS=Homo sapiens GN=NDUFS2	NDUS2_HUMAN (+1)		52 kDa		unknown	2.0202	0.9901
144	TRUE	Empty	Myosin regulatory light chain 10 OS=Homo sapiens GN=MYL10 PE=2 SV=2	sp|Q9BUA6|MYL10_HUMANMyosin regulatory light chain 10 OS=Homo sapiens GN=MYL10 PE=2 SV=2		?		unknown	3.0303	0.9901
145	TRUE	Empty	Isoform 2 of 40S ribosomal protein S3 OS=Homo sapiens GN=RPS3	sp|P23396-2|RS3_HUMAN (+1)		28 kDa		unknown	0	0.9901
146	TRUE	Empty	Polymerase delta-interacting protein 2 OS=Homo sapiens GN=POLDIP2 PE=1 SV=1	sp|Q9Y2S7|PDIP2_HUMANPolymerase delta-interacting protein 2 OS=Homo sapiens GN=POLDIP2 PE=1 SV=1		?		unknown	0	0.9901
147	TRUE	Empty	Malate dehydrogenase, mitochondrial OS=Homo sapiens GN=MDH2 PE=1 SV=3	sp|P40926|MDHM_HUMAN		36 kDa		unknown	1.0101	0.9901
148	TRUE	Empty	SWISS-PROT:P02754 Beta-lactoglobulin - Bos taurus (Bovine).	P02754		?		unknown	0	0.9901
149	TRUE	Empty	Sodium/potassium-transporting ATPase subunit alpha-2 OS=Homo sapiens GN=ATP1A2 PE=1 SV=1	sp|P50993|AT1A2_HUMANSodium/potassium-transporting ATPase subunit alpha-2 OS=Homo sapiens GN=ATP1A2 PE=1 SV=1		?		unknown	1.0101	0.9901
150	TRUE	Empty	Glycogen debranching enzyme OS=Homo sapiens GN=AGL PE=1 SV=3	GDE_HUMAN (+2)		175 kDa		unknown	1.0101	0.9901
154	TRUE	Empty	Puromycin-sensitive aminopeptidase OS=Homo sapiens GN=NPEPPS PE=1 SV=2	sp|P55786|PSA_HUMAN (+2)		103 kDa		unknown	2.0202	0.9901
155	TRUE	Empty	Isoform 2 of Prohibitin-2 OS=Homo sapiens GN=PHB2	sp|Q99623-2|PHB2_HUMAN (+1)		29 kDa		unknown	1.0101	0.9901
157	TRUE	Empty	Isoform 2 of Thioredoxin-dependent peroxide reductase, mitochondrial OS=Homo sapiens GN=PRDX3	PRDX3_HUMAN (+1)		26 kDa		unknown	0	0.9901
162	TRUE	Empty	Isoform 2 of NADH dehydrogenase [ubiquinone] flavoprotein 1, mitochondrial OS=Homo sapiens GN=NDUFV1	sp|P49821-2|NDUV1_HUMAN (+1)		50 kDa		unknown	2.0202	0.9901
164	TRUE	Empty	Mapk-regulated corepressor-interacting protein 1 OS=Homo sapiens GN=MCRIP1 PE=1 SV=1	MCRI1_HUMAN		11 kDa		unknown	0	0.9901
165	TRUE	Empty	Isoform 2 of Fructose-bisphosphate aldolase A OS=Homo sapiens GN=ALDOA	ALDOA_HUMAN (+1)		45 kDa		unknown	1.0101	0.9901
166	TRUE	Empty	Isoform SV of 14-3-3 protein epsilon OS=Homo sapiens GN=YWHAE	sp|P62258-2|1433E_HUMAN (+1)		27 kDa	TRUE	unknown	1.0101	0.9901
168	TRUE	Empty	Isoform 3 of Methionine aminopeptidase 2 OS=Homo sapiens GN=METAP2	sp|P50579-3|MAP2_HUMAN (+1)		50 kDa		unknown	0	0.9901
169	TRUE	Empty	Isoform 2 of Regulator of nonsense transcripts 3B OS=Homo sapiens GN=UPF3B	sp|Q9BZI7-2|REN3B_HUMAN		56 kDa		unknown	0	0.9901
171	TRUE	Empty	Elongation factor 1-alpha 1 OS=Homo sapiens GN=EEF1A1 PE=1 SV=1	sp|P68104|EF1A1_HUMANElongation factor 1-alpha 1 OS=Homo sapiens GN=EEF1A1 PE=1 SV=1 (+2)		?		unknown	1.0101	0.9901
172	TRUE	Empty	Isoform 2 of Importin-5 OS=Homo sapiens GN=IPO5	sp|O00410-2|IPO5_HUMAN (+2)		117 kDa		unknown	0	0.9901
173	TRUE	Empty	Propionyl-CoA carboxylase beta chain, mitochondrial OS=Homo sapiens GN=PCCB PE=1 SV=3	sp|P05166|PCCB_HUMAN		58 kDa		unknown	1.0101	0.9901
175	TRUE	Empty	RNA-binding protein EWS OS=Homo sapiens GN=EWSR1 PE=1 SV=1	sp|Q01844|EWS_HUMAN (+4)		68 kDa		unknown	0	0.9901
176	TRUE	Empty	Isoform 2 of Annexin A2 OS=Homo sapiens GN=ANXA2	ANXA2_HUMAN (+1)		40 kDa		unknown	1.0101	0.9901
177	TRUE	Empty	Single-stranded DNA-binding protein, mitochondrial OS=Homo sapiens GN=SSBP1 PE=1 SV=1	SSBP_HUMAN		17 kDa		unknown	1.0101	0.9901
178	TRUE	Empty	Isoform 2 of Polyadenylate-binding protein-interacting protein 1 OS=Homo sapiens GN=PAIP1	sp|Q9H074-2|PAIP1_HUMAN (+1)		46 kDa		unknown	0	0.9901
179	TRUE	Empty	Glutaredoxin-3 OS=Homo sapiens GN=GLRX3 PE=1 SV=2	sp|O76003|GLRX3_HUMANGlutaredoxin-3 OS=Homo sapiens GN=GLRX3 PE=1 SV=2		?		unknown	1.0101	0.9901
182	TRUE	Empty	Mitochondrial carrier homolog 2 OS=Homo sapiens GN=MTCH2 PE=1 SV=1	sp|Q9Y6C9|MTCH2_HUMANMitochondrial carrier homolog 2 OS=Homo sapiens GN=MTCH2 PE=1 SV=1		?		unknown	1.0101	0.9901
185	TRUE	Empty	Isoform 1 of Glycerol kinase OS=Homo sapiens GN=GK	sp|P32189-1|GLPK_HUMAN (+4)		57 kDa		unknown	1.0101	0.9901
186	TRUE	Empty	Isoform 2 of Heterogeneous nuclear ribonucleoprotein D-like OS=Homo sapiens GN=HNRNPDL	sp|O14979-2|HNRDL_HUMAN (+2)		34 kDa	TRUE	unknown	0	0.9901
192	TRUE	Empty	Glutamate-rich WD repeat-containing protein 1 OS=Homo sapiens GN=GRWD1 PE=1 SV=1	GRWD1_HUMAN		49 kDa	TRUE	unknown	0	0.9901
195	TRUE	Empty	Isoform 2 of Protein-L-isoaspartate(D-aspartate) O-methyltransferase OS=Homo sapiens GN=PCMT1	sp|P22061-2|PIMT_HUMAN (+1)		25 kDa		unknown	0	0.9901
196	TRUE	Empty	Eukaryotic translation initiation factor 3 subunit H OS=Homo sapiens GN=EIF3H PE=1 SV=1	EIF3H_HUMAN		40 kDa		unknown	0	0.9901
197	TRUE	Empty	Caprin-1 OS=Homo sapiens GN=CAPRIN1 PE=1 SV=2	sp|Q14444|CAPR1_HUMANCaprin-1 OS=Homo sapiens GN=CAPRIN1 PE=1 SV=2		?		unknown	0	0.9901
198	TRUE	Empty	40S ribosomal protein S19 OS=Homo sapiens GN=RPS19 PE=1 SV=2	RS19_HUMAN		16 kDa		unknown	0	0.9901
199	TRUE	Empty	Pre-mRNA-processing factor 19 OS=Homo sapiens GN=PRPF19 PE=1 SV=1	PRP19_HUMAN		55 kDa		unknown	0	0.9901
200	TRUE	Empty	40S ribosomal protein S14 OS=Homo sapiens GN=RPS14 PE=1 SV=3	RS14_HUMAN		16 kDa		unknown	0	0.9901
201	TRUE	Empty	Peptidyl-prolyl cis-trans isomerase A OS=Homo sapiens GN=PPIA PE=1 SV=2	PPIA_HUMAN		18 kDa		unknown	1.0101	0.9901
202	TRUE	Empty	Isoform 3 of Ubiquitin-conjugating enzyme E2 L3 OS=Homo sapiens GN=UBE2L3	UB2L3_HUMAN (+1)		24 kDa		unknown	1.0101	0.9901
203	TRUE	Empty	Zinc-alpha-2-glycoprotein OS=Homo sapiens GN=AZGP1 PE=1 SV=2	ZA2G_HUMAN		34 kDa		unknown	0	0.9901
204	TRUE	Empty	Isoform 2 of Elongation factor 1-gamma OS=Homo sapiens GN=EEF1G	sp|P26641-2|EF1G_HUMAN (+1)		56 kDa		unknown	1.0101	0.9901
205	TRUE	Empty	Isoform 2 of Proteasome subunit alpha type-6 OS=Homo sapiens GN=PSMA6	sp|P60900-2|PSA6_HUMAN (+2)		25 kDa		unknown	1.0101	0.9901
209	TRUE	Empty	Solute carrier family 40 member 1 OS=Homo sapiens GN=SLC40A1 PE=1 SV=1	S40A1_HUMAN (+1)		63 kDa		unknown	1.0101	0.9901
210	TRUE	Empty	Cullin-associated NEDD8-dissociated protein 2 OS=Homo sapiens GN=CAND2 PE=1 SV=3	sp|O75155|CAND2_HUMANCullin-associated NEDD8-dissociated protein 2 OS=Homo sapiens GN=CAND2 PE=1 SV=3		?		unknown	1.0101	0.9901
212	TRUE	Empty	Aldehyde dehydrogenase, mitochondrial OS=Homo sapiens GN=ALDH2 PE=1 SV=2	sp|P05091|ALDH2_HUMANAldehyde dehydrogenase, mitochondrial OS=Homo sapiens GN=ALDH2 PE=1 SV=2		?		unknown	1.0101	0.9901
214	TRUE	Empty	Hydroxysteroid dehydrogenase-like protein 2 OS=Homo sapiens GN=HSDL2 PE=1 SV=1	sp|Q6YN16|HSDL2_HUMANHydroxysteroid dehydrogenase-like protein 2 OS=Homo sapiens GN=HSDL2 PE=1 SV=1		?		unknown	1.0101	0.9901
215	TRUE	Empty	Isoform 2 of Sarcalumenin OS=Homo sapiens GN=SRL	sp|Q86TD4-2|SRCA_HUMAN (+1)		54 kDa		unknown	1.0101	0.9901
223	TRUE	Empty	40S ribosomal protein S18 OS=Homo sapiens GN=RPS18 PE=1 SV=3	RS18_HUMAN		18 kDa		unknown	0	0.9901
228	TRUE	Empty	Heat shock 70 kDa protein 4 OS=Homo sapiens GN=HSPA4 PE=1 SV=4	sp|P34932|HSP74_HUMANHeat shock 70 kDa protein 4 OS=Homo sapiens GN=HSPA4 PE=1 SV=4		?		unknown	0	0.9901
229	TRUE	Empty	Isoform 2 of Pyruvate dehydrogenase E1 component subunit beta, mitochondrial OS=Homo sapiens GN=PDHB	sp|P11177-2|ODPB_HUMAN (+2)		37 kDa		unknown	0	0.9901
231	TRUE	Empty	Annexin A5 OS=Homo sapiens GN=ANXA5 PE=1 SV=2	ANXA5_HUMAN		36 kDa		unknown	0	0.9901
232	TRUE	Empty	Isoform 2 of Peptidylprolyl isomerase domain and WD repeat-containing protein 1 OS=Homo sapiens GN=PPWD1	PPWD1_HUMAN		56 kDa		unknown	0	0.9901
233	TRUE	Empty	Isoform 2 of Mitochondrial fission regulator 1-like OS=Homo sapiens GN=MTFR1L	sp|Q9H019-2|MFR1L_HUMAN (+2)		23 kDa		unknown	1.0101	0.9901
235	TRUE	Empty	60S acidic ribosomal protein P2 OS=Homo sapiens GN=RPLP2 PE=1 SV=1	RLA2_HUMAN		12 kDa		unknown	0	0.9901
236	TRUE	Empty	Isoform 2 of T-complex protein 1 subunit zeta OS=Homo sapiens GN=CCT6A	sp|P40227-2|TCPZ_HUMAN (+1)		53 kDa		unknown	1.0101	0.9901
237	TRUE	Empty	Cysteine and glycine-rich protein 2 OS=Homo sapiens GN=CSRP2 PE=1 SV=3	sp|Q16527|CSRP2_HUMANCysteine and glycine-rich protein 2 OS=Homo sapiens GN=CSRP2 PE=1 SV=3		?		unknown	0	0.9901
239	TRUE	Empty	Skin-specific protein 32 OS=Homo sapiens GN=XP32 PE=1 SV=1	XP32_HUMAN		26 kDa		unknown	1.0101	0.9901
241	TRUE	Empty	Complement C1q subcomponent subunit B OS=Homo sapiens GN=C1QB PE=1 SV=3	C1QB_HUMAN		27 kDa		unknown	0	0.9901
242	TRUE	Empty	Isoform 2 of Protein LSM12 homolog OS=Homo sapiens GN=LSM12	LSM12_HUMAN (+1)		22 kDa		unknown	0	0.9901
243	TRUE	Empty	40S ribosomal protein S25 OS=Homo sapiens GN=RPS25 PE=1 SV=1	RS25_HUMAN		14 kDa		unknown	0	0.9901
244	TRUE	Empty	Isoform 2 of Thioredoxin OS=Homo sapiens GN=TXN	sp|P10599-2|THIO_HUMAN (+1)		9 kDa		unknown	0	0.9901
245	TRUE	Empty	Isoform 2 of Bifunctional purine biosynthesis protein PURH OS=Homo sapiens GN=ATIC	sp|P31939-2|PUR9_HUMAN (+1)		65 kDa		unknown	0	0.9901
246	TRUE	Empty	Isoform 2 of 60S ribosomal protein L15 OS=Homo sapiens GN=RPL15	sp|P61313-2|RL15_HUMAN (+1)		17 kDa		unknown	0	0.9901
247	TRUE	Empty	THO complex subunit 4 OS=Homo sapiens GN=ALYREF PE=1 SV=3	sp|Q86V81|THOC4_HUMANTHO complex subunit 4 OS=Homo sapiens GN=ALYREF PE=1 SV=3		?		unknown	0	0.9901
248	TRUE	Empty	CDGSH iron-sulfur domain-containing protein 1 OS=Homo sapiens GN=CISD1 PE=1 SV=1	sp|Q9NZ45|CISD1_HUMANCDGSH iron-sulfur domain-containing protein 1 OS=Homo sapiens GN=CISD1 PE=1 SV=1		?		unknown	0	0.9901
258	TRUE	Empty	Carnitine O-palmitoyltransferase 2, mitochondrial OS=Homo sapiens GN=CPT2 PE=1 SV=2	CPT2_HUMAN		74 kDa		unknown	0	0.9901
259	TRUE	Empty	tRNA-splicing ligase RtcB homolog OS=Homo sapiens GN=RTCB PE=1 SV=1	RTCB_HUMAN		55 kDa		unknown	0	0.9901
260	TRUE	Empty	DnaJ homolog subfamily C member 9 OS=Homo sapiens GN=DNAJC9 PE=1 SV=1	DNJC9_HUMAN		30 kDa		unknown	0	0.9901
261	TRUE	Empty	Isochorismatase domain-containing protein 1 OS=Homo sapiens GN=ISOC1 PE=1 SV=3	sp|Q96CN7|ISOC1_HUMANIsochorismatase domain-containing protein 1 OS=Homo sapiens GN=ISOC1 PE=1 SV=3		?		unknown	0	0.9901
262	TRUE	Empty	N-acylneuraminate cytidylyltransferase OS=Homo sapiens GN=CMAS PE=1 SV=2	NEUA_HUMAN		48 kDa		unknown	0	0.9901
263	TRUE	Empty	Isoform 2 of Acidic leucine-rich nuclear phosphoprotein 32 family member B OS=Homo sapiens GN=ANP32B	sp|Q92688-2|AN32B_HUMAN (+1)		22 kDa		unknown	0	0.9901
265	TRUE	Empty	Lipocalin-1 OS=Homo sapiens GN=LCN1 PE=1 SV=1	LCN1_HUMAN (+1)		19 kDa		unknown	0	0.9901
266	TRUE	Empty	Isoform 2 of mRNA cap guanine-N7 methyltransferase OS=Homo sapiens GN=RNMT	sp|O43148-2|MCES_HUMAN (+1)		58 kDa		unknown	0	0.9901
267	TRUE	Empty	Isoform 2 of 60S ribosomal protein L31 OS=Homo sapiens GN=RPL31	sp|P62899-2|RL31_HUMAN (+2)		15 kDa		unknown	0	0.9901
269	TRUE	Empty	Isoform Short of 14-3-3 protein beta/alpha OS=Homo sapiens GN=YWHAB	1433B_HUMAN (+1)		28 kDa		unknown	0	0.9901
270	TRUE	Empty	Laminin subunit alpha-1 OS=Homo sapiens GN=LAMA1 PE=1 SV=2	sp|P25391|LAMA1_HUMANLaminin subunit alpha-1 OS=Homo sapiens GN=LAMA1 PE=1 SV=2		?		unknown	0	0.9901
271	TRUE	Empty	Protein disulfide-isomerase A3 OS=Homo sapiens GN=PDIA3 PE=1 SV=4	sp|P30101|PDIA3_HUMANProtein disulfide-isomerase A3 OS=Homo sapiens GN=PDIA3 PE=1 SV=4		?		unknown	0	0.9901
272	TRUE	Empty	60S ribosomal protein L29 OS=Homo sapiens GN=RPL29 PE=1 SV=2	RL29_HUMAN		18 kDa		unknown	0	0.9901
1.4	TRUE	Empty	SWISS-PROT:Q7Z794 Tax_Id=9606 Gene_Symbol=KRT77 Keratin 77	sp|Q7Z794|K2C1B_HUMANKeratin, type II cytoskeletal 1b OS=Homo sapiens GN=KRT77 PE=1 SV=3		?	TRUE	unknown	12.121	0
1.11	TRUE	Empty	Keratin, type II cytoskeletal 2 oral OS=Homo sapiens GN=KRT76 PE=1 SV=2	K22O_HUMAN		66 kDa	TRUE	unknown	5.0505	0
1.14	TRUE	Empty	SWISS-PROT:P07744 Tax_Id=10090 Gene_Symbol=Krt4 Keratin, type II cytoskeletal 4	P07744		?	TRUE	unknown	1.0101	0
1.15	TRUE	Empty	SWISS-PROT:P02538 Tax_Id=9606 Gene_Symbol=KRT6A Keratin, type II cytoskeletal 6A	sp|P02538|K2C6A_HUMANKeratin, type II cytoskeletal 6A OS=Homo sapiens GN=KRT6A PE=1 SV=3		?	TRUE	unknown	15.151	0
1.16	TRUE	Empty	SWISS-PROT:P04259 Tax_Id=9606 Gene_Symbol=KRT6B Keratin, type II cytoskeletal 6B	sp|P04259|K2C6B_HUMANKeratin, type II cytoskeletal 6B OS=Homo sapiens GN=KRT6B PE=1 SV=5		?	TRUE	unknown	21.212	0
1.2	TRUE	Empty	(Bos taurus) 63 kDa protein	ENSEMBL:ENSBTAP00000038253		?	TRUE	unknown	20.202	0
1.22	TRUE	Empty	Tax_Id=9606 Gene_Symbol=- Similar to Keratin, type II cytoskeletal 8	H-INV:HIT000016045		?	TRUE	unknown	2.0202	0
1.25	TRUE	Empty	TREMBL:Q6IME9 Tax_Id=10090 Gene_Symbol=Krt72 Type-II keratin Kb35	Q6IME9		?	TRUE	unknown	1.0101	0
1.26	TRUE	Empty	Isoform 2 of Keratin, type II cytoskeletal 8 OS=Homo sapiens GN=KRT8	sp|P05787-2|K2C8_HUMAN (+1)		57 kDa	TRUE	unknown	0	0
1.27	TRUE	Empty	SWISS-PROT:Q5XQN5 (Bos taurus) Keratin, type II cytoskeletal 5	Q5XQN5		?	TRUE	unknown	0	0
2.4	TRUE	Empty	Beta-actin-like protein 2 OS=Homo sapiens GN=ACTBL2 PE=1 SV=2	sp|Q562R1|ACTBL_HUMANBeta-actin-like protein 2 OS=Homo sapiens GN=ACTBL2 PE=1 SV=2		?	TRUE	unknown	20.202	0
2.5	TRUE	Empty	POTE ankyrin domain family member I OS=Homo sapiens GN=POTEI PE=3 SV=1	sp|P0CG38|POTEI_HUMANPOTE ankyrin domain family member I OS=Homo sapiens GN=POTEI PE=3 SV=1		?	TRUE	unknown	2.0202	0
2.6	TRUE	Empty	POTE ankyrin domain family member E OS=Homo sapiens GN=POTEE PE=2 SV=3	sp|Q6S8J3|POTEE_HUMANPOTE ankyrin domain family member E OS=Homo sapiens GN=POTEE PE=2 SV=3		?	TRUE	unknown	3.0303	0
2.7	TRUE	Empty	Isoform 2 of Actin, gamma-enteric smooth muscle OS=Homo sapiens GN=ACTG2	sp|P63267-2|ACTH_HUMAN (+1)		37 kDa	TRUE	unknown	0	0
2.8	TRUE	Empty	Putative beta-actin-like protein 3 OS=Homo sapiens GN=POTEKP PE=5 SV=1	sp|Q9BYX7|ACTBM_HUMANPutative beta-actin-like protein 3 OS=Homo sapiens GN=POTEKP PE=5 SV=1		?	TRUE	unknown	0	0
3.4	TRUE	Empty	Myosin-3 OS=Homo sapiens GN=MYH3 PE=1 SV=3	MYH3_HUMAN		224 kDa	TRUE	unknown	2.0202	0
3.5	TRUE	Empty	Myosin-8 OS=Homo sapiens GN=MYH8 PE=1 SV=3	MYH8_HUMAN		223 kDa	TRUE	unknown	1.0101	0
5.1	TRUE	Empty	Heat shock cognate 71 kDa protein OS=Homo sapiens GN=HSPA8 PE=1 SV=1	sp|P11142|HSP7C_HUMANHeat shock cognate 71 kDa protein OS=Homo sapiens GN=HSPA8 PE=1 SV=1		?	TRUE	unknown	41.414	0
5.3	TRUE	Empty	Heat shock 70 kDa protein 1A OS=Homo sapiens GN=HSPA1A PE=1 SV=1	sp|P0DMV8|HS71A_HUMANHeat shock 70 kDa protein 1A OS=Homo sapiens GN=HSPA1A PE=1 SV=1 (+1)		?	TRUE	unknown	36.363	0
5.6	TRUE	Empty	Heat shock 70 kDa protein 1-like OS=Homo sapiens GN=HSPA1L PE=1 SV=2	sp|P34931|HS71L_HUMANHeat shock 70 kDa protein 1-like OS=Homo sapiens GN=HSPA1L PE=1 SV=2		?	TRUE	unknown	19.192	0
5.7	TRUE	Empty	Heat shock-related 70 kDa protein 2 OS=Homo sapiens GN=HSPA2 PE=1 SV=1	sp|P54652|HSP72_HUMANHeat shock-related 70 kDa protein 2 OS=Homo sapiens GN=HSPA2 PE=1 SV=1		?	TRUE	unknown	23.232	0
5.8	TRUE	Empty	Heat shock 70 kDa protein 6 OS=Homo sapiens GN=HSPA6 PE=1 SV=2	sp|P17066|HSP76_HUMANHeat shock 70 kDa protein 6 OS=Homo sapiens GN=HSPA6 PE=1 SV=2		?	TRUE	unknown	17.172	0
7.1	TRUE	Empty	SWISS-PROT:P13645 Tax_Id=9606 Gene_Symbol=KRT10 Keratin, type I cytoskeletal 10	sp|P13645|K1C10_HUMANKeratin, type I cytoskeletal 10 OS=Homo sapiens GN=KRT10 PE=1 SV=6		?	TRUE	unknown	54.545	0
7.4	TRUE	Empty	SWISS-PROT:P02533 Tax_Id=9606 Gene_Symbol=KRT14 Keratin, type I cytoskeletal 14	sp|P02533|K1C14_HUMANKeratin, type I cytoskeletal 14 OS=Homo sapiens GN=KRT14 PE=1 SV=4		?	TRUE	unknown	17.172	0
7.5	TRUE	Empty	SWISS-PROT:P08779 Tax_Id=9606 Gene_Symbol=KRT16 Keratin, type I cytoskeletal 16	sp|P08779|K1C16_HUMANKeratin, type I cytoskeletal 16 OS=Homo sapiens GN=KRT16 PE=1 SV=4		?	TRUE	unknown	14.141	0
7.6	TRUE	Empty	SWISS-PROT:Q04695 Tax_Id=9606 Gene_Symbol=KRT17 Keratin, type I cytoskeletal 17	sp|Q04695|K1C17_HUMANKeratin, type I cytoskeletal 17 OS=Homo sapiens GN=KRT17 PE=1 SV=2		?	TRUE	unknown	9.0909	0
7.14	TRUE	Empty	SWISS-PROT:P08727 Tax_Id=9606 Gene_Symbol=KRT19 Keratin, type I cytoskeletal 19	sp|P08727|K1C19_HUMANKeratin, type I cytoskeletal 19 OS=Homo sapiens GN=KRT19 PE=1 SV=4		?	TRUE	unknown	3.0303	0
7.15	TRUE	Empty	SWISS-PROT:Q7Z3Y7 Tax_Id=9606 Gene_Symbol=KRT28 Keratin 25D	sp|Q7Z3Y7|K1C28_HUMANKeratin, type I cytoskeletal 28 OS=Homo sapiens GN=KRT28 PE=1 SV=2		?	TRUE	unknown	5.0505	0
7.16	TRUE	Empty	SWISS-PROT:Q7Z3Y9 Tax_Id=9606 Gene_Symbol=KRT26 Keratin, type I cytoskeletal 26	sp|Q7Z3Y9|K1C26_HUMANKeratin, type I cytoskeletal 26 OS=Homo sapiens GN=KRT26 PE=1 SV=2		?	TRUE	unknown	1.0101	0
7.17	TRUE	Empty	SWISS-PROT:P02535-1 Tax_Id=10090 Gene_Symbol=Krt10 Isoform 1 of Keratin, type I cytoskeletal 10	P02535-1		?	TRUE	unknown	0	0
23.2	TRUE	Empty	Alpha-actinin-3 OS=Homo sapiens GN=ACTN3 PE=1 SV=2	sp|Q08043|ACTN3_HUMANAlpha-actinin-3 OS=Homo sapiens GN=ACTN3 PE=1 SV=2		?	TRUE	unknown	5.0505	0
29.4	TRUE	Empty	Polyadenylate-binding protein 3 OS=Homo sapiens GN=PABPC3 PE=1 SV=2	sp|Q9H361|PABP3_HUMANPolyadenylate-binding protein 3 OS=Homo sapiens GN=PABPC3 PE=1 SV=2		?	TRUE	unknown	2.0202	0
41.1	TRUE	Empty	78 kDa glucose-regulated protein OS=Homo sapiens GN=HSPA5 PE=1 SV=2	sp|P11021|GRP78_HUMAN78 kDa glucose-regulated protein OS=Homo sapiens GN=HSPA5 PE=1 SV=2		?	TRUE	unknown	38.384	0
49.2	TRUE	Empty	Isoform 2 of ATP-dependent RNA helicase DDX39A OS=Homo sapiens GN=DDX39A	sp|O00148-2|DX39A_HUMAN		37 kDa	TRUE	unknown	0	0
49.3	TRUE	Empty	ATP-dependent RNA helicase DDX39A OS=Homo sapiens GN=DDX39A PE=1 SV=2	sp|O00148|DX39A_HUMANATP-dependent RNA helicase DDX39A OS=Homo sapiens GN=DDX39A PE=1 SV=2		?	TRUE	unknown	2.0202	0
61.2	TRUE	Empty	Putative tubulin-like protein alpha-4B OS=Homo sapiens GN=TUBA4B PE=5 SV=2	sp|Q9H853|TBA4B_HUMANPutative tubulin-like protein alpha-4B OS=Homo sapiens GN=TUBA4B PE=5 SV=2		?	TRUE	unknown	0	0
67.1	TRUE	Empty	Stress-70 protein, mitochondrial OS=Homo sapiens GN=HSPA9 PE=1 SV=2	sp|P38646|GRP75_HUMANStress-70 protein, mitochondrial OS=Homo sapiens GN=HSPA9 PE=1 SV=2		?	TRUE	unknown	37.374	0
72	TRUE	Empty	Isoform 2 of Dynein heavy chain 17, axonemal OS=Homo sapiens GN=DNAH17	sp|Q9UFH2-2|DYH17_HUMAN		508 kDa		unknown	1.0101	0
75	TRUE	Empty	Isoform 2 of Ryanodine receptor 2 OS=Homo sapiens GN=RYR2	sp|Q92736-2|RYR2_HUMAN (+1)		565 kDa	TRUE	unknown	4.0404	0
82	TRUE	Empty	Ubiquitin-60S ribosomal protein L40 OS=Homo sapiens GN=UBA52 PE=1 SV=2	RL40_HUMAN		15 kDa		unknown	1.0101	0
94	TRUE	Empty	Isoform Beta of Heat shock protein 105 kDa OS=Homo sapiens GN=HSPH1	sp|Q92598-2|HS105_HUMAN (+1)		92 kDa	TRUE	unknown	1.0101	0
97.1	TRUE	Empty	DnaJ homolog subfamily C member 8 OS=Homo sapiens GN=DNAJC8 PE=1 SV=2	sp|O75937|DNJC8_HUMANDnaJ homolog subfamily C member 8 OS=Homo sapiens GN=DNAJC8 PE=1 SV=2		?	TRUE	unknown	4.0404	0
118	TRUE	Empty	Aconitate hydratase, mitochondrial OS=Homo sapiens GN=ACO2 PE=1 SV=2	ACON_HUMAN		85 kDa		unknown	2.0202	0
125.1	TRUE	Empty	Isoform 2 of Heterogeneous nuclear ribonucleoprotein L OS=Homo sapiens GN=HNRNPL	sp|P14866-2|HNRPL_HUMAN		51 kDa	TRUE	unknown	0	0
132	TRUE	Empty	Desmin OS=Homo sapiens GN=DES PE=1 SV=3	DESM_HUMAN		54 kDa	TRUE	unknown	3.0303	0
133	TRUE	Empty	Trimeric intracellular cation channel type A OS=Homo sapiens GN=TMEM38A PE=1 SV=1	sp|Q9H6F2|TM38A_HUMANTrimeric intracellular cation channel type A OS=Homo sapiens GN=TMEM38A PE=1 SV=1		?		unknown	3.0303	0
138	TRUE	Empty	Transitional endoplasmic reticulum ATPase OS=Homo sapiens GN=VCP PE=1 SV=4	TERA_HUMAN		89 kDa		unknown	2.0202	0
139	TRUE	Empty	Succinyl-CoA:3-ketoacid coenzyme A transferase 2, mitochondrial OS=Homo sapiens GN=OXCT2 PE=2 SV=2	sp|Q9BYC2|SCOT2_HUMANSuccinyl-CoA:3-ketoacid coenzyme A transferase 2, mitochondrial OS=Homo sapiens GN=OXCT2 PE=2 SV=2		?		unknown	3.0303	0
142	TRUE	Empty	Cleavage and polyadenylation specificity factor subunit 5 OS=Homo sapiens GN=NUDT21 PE=1 SV=1	sp|O43809|CPSF5_HUMANCleavage and polyadenylation specificity factor subunit 5 OS=Homo sapiens GN=NUDT21 PE=1 SV=1		?	TRUE	unknown	2.0202	0
143	TRUE	Empty	Lupus La protein OS=Homo sapiens GN=SSB PE=1 SV=2	LA_HUMAN		47 kDa		unknown	2.0202	0
151	TRUE	Empty	Isoform 1 of Vinculin OS=Homo sapiens GN=VCL	sp|P18206-2|VINC_HUMAN (+2)		117 kDa		unknown	1.0101	0
152	TRUE	Empty	Isoform 2 of Calcium-binding mitochondrial carrier protein Aralar2 OS=Homo sapiens GN=SLC25A13	sp|Q9UJS0-2|CMC2_HUMAN (+1)		74 kDa		unknown	2.0202	0
156	TRUE	Empty	Ubiquinone biosynthesis protein COQ9, mitochondrial OS=Homo sapiens GN=COQ9 PE=1 SV=1	COQ9_HUMAN		36 kDa		unknown	2.0202	0
158	TRUE	Empty	Isoform 2 of Poly(rC)-binding protein 2 OS=Homo sapiens GN=PCBP2	sp|Q15366-2|PCBP2_HUMAN (+6)		39 kDa		unknown	1.0101	0
159	TRUE	Empty	Proline-rich protein PRCC OS=Homo sapiens GN=PRCC PE=1 SV=1	PRCC_HUMAN		52 kDa		unknown	1.0101	0
160	TRUE	Empty	Isoform 2 of Phosphoglucomutase-1 OS=Homo sapiens GN=PGM1	sp|P36871-2|PGM1_HUMAN (+1)		64 kDa		unknown	3.0303	0
170	TRUE	Empty	Isoform 2 of Phosphoglycerate kinase 1 OS=Homo sapiens GN=PGK1	sp|P00558-2|PGK1_HUMAN (+1)		41 kDa		unknown	1.0101	0
174	TRUE	Empty	Isoform 2 of Calsequestrin-2 OS=Homo sapiens GN=CASQ2	CASQ2_HUMAN (+1)		38 kDa		unknown	1.0101	0
183	TRUE	Empty	(Bos taurus) 55 kDa protein	ENSEMBL:ENSBTAP00000031360		?		unknown	1.0101	0
184	TRUE	Empty	Filaggrin OS=Homo sapiens GN=FLG PE=1 SV=3	FILA_HUMAN		435 kDa		unknown	1.0101	0
187	TRUE	Empty	Isoform 2 of Tropomyosin alpha-3 chain OS=Homo sapiens GN=TPM3	sp|P06753-2|TPM3_HUMAN (+11)		29 kDa		unknown	1.0101	0
188	TRUE	Empty	Isoform Heart of ATP synthase subunit gamma, mitochondrial OS=Homo sapiens GN=ATP5C1	sp|P36542-2|ATPG_HUMAN (+1)		33 kDa		unknown	1.0101	0
190	TRUE	Empty	Heterogeneous nuclear ribonucleoprotein F OS=Homo sapiens GN=HNRNPF PE=1 SV=3	sp|P52597|HNRPF_HUMANHeterogeneous nuclear ribonucleoprotein F OS=Homo sapiens GN=HNRNPF PE=1 SV=3		?	TRUE	unknown	3.0303	0
193	TRUE	Empty	Troponin I, cardiac muscle OS=Homo sapiens GN=TNNI3 PE=1 SV=3	sp|P19429|TNNI3_HUMANTroponin I, cardiac muscle OS=Homo sapiens GN=TNNI3 PE=1 SV=3		?		unknown	1.0101	0
206	TRUE	Empty	Isoform 3 of Echinoderm microtubule-associated protein-like 1 OS=Homo sapiens GN=EML1	EMAL1_HUMAN (+1)		92 kDa		unknown	1.0101	0
207	TRUE	Empty	Isoform 2 of Serine beta-lactamase-like protein LACTB, mitochondrial OS=Homo sapiens GN=LACTB	LACTB_HUMAN (+1)		41 kDa		unknown	1.0101	0
208	TRUE	Empty	Isoform 2 of Acyl-protein thioesterase 1 OS=Homo sapiens GN=LYPLA1	LYPA1_HUMAN (+1)		23 kDa		unknown	1.0101	0
211	TRUE	Empty	Isoform 2 of Gamma-glutamylcyclotransferase OS=Homo sapiens GN=GGCT	sp|O75223-2|GGCT_HUMAN (+2)		13 kDa		unknown	1.0101	0
213	TRUE	Empty	Isoform 1 of Voltage-dependent anion-selective channel protein 2 OS=Homo sapiens GN=VDAC2	sp|P45880-1|VDAC2_HUMAN (+2)		33 kDa		unknown	1.0101	0
216	TRUE	Empty	Isoform 2 of 3-hydroxyacyl-CoA dehydrogenase type-2 OS=Homo sapiens GN=HSD17B10	sp|Q99714-2|HCD2_HUMAN (+1)		26 kDa		unknown	1.0101	0
217	TRUE	Empty	Isoform 2 of T-complex protein 1 subunit eta OS=Homo sapiens GN=CCT7	sp|Q99832-2|TCPH_HUMAN (+3)		37 kDa		unknown	1.0101	0
218	TRUE	Empty	Transmembrane protein 14C OS=Homo sapiens GN=TMEM14C PE=1 SV=1	sp|Q9P0S9|TM14C_HUMANTransmembrane protein 14C OS=Homo sapiens GN=TMEM14C PE=1 SV=1		?		unknown	1.0101	0
219	TRUE	Empty	Bifunctional glutamate/proline--tRNA ligase OS=Homo sapiens GN=EPRS PE=1 SV=5	SYEP_HUMAN		171 kDa		unknown	1.0101	0
220	TRUE	Empty	Protein-cysteine N-palmitoyltransferase HHAT-like protein OS=Homo sapiens GN=HHATL PE=2 SV=1	sp|Q9HCP6|HHATL_HUMANProtein-cysteine N-palmitoyltransferase HHAT-like protein OS=Homo sapiens GN=HHATL PE=2 SV=1		?		unknown	2.0202	0
221	TRUE	Empty	Nebulette OS=Homo sapiens GN=NEBL PE=1 SV=1	sp|O76041|NEBL_HUMAN		116 kDa		unknown	1.0101	0
222	TRUE	Empty	NADP-dependent malic enzyme, mitochondrial OS=Homo sapiens GN=ME3 PE=2 SV=2	sp|Q16798|MAON_HUMAN		67 kDa		unknown	1.0101	0
224	TRUE	Empty	Bromodomain-containing protein 4 OS=Homo sapiens GN=BRD4 PE=1 SV=2	sp|O60885|BRD4_HUMAN		152 kDa		unknown	1.0101	0
225	TRUE	Empty	Isoform A of Isocitrate dehydrogenase [NAD] subunit beta, mitochondrial OS=Homo sapiens GN=IDH3B	sp|O43837-2|IDH3B_HUMAN (+2)		42 kDa		unknown	1.0101	0
227	TRUE	Empty	Isoform 2 of Eukaryotic initiation factor 4A-II OS=Homo sapiens GN=EIF4A2	IF4A2_HUMAN (+2)		46 kDa		unknown	1.0101	0
230	TRUE	Empty	Calreticulin OS=Homo sapiens GN=CALR PE=1 SV=1	CALR_HUMAN		48 kDa		unknown	1.0101	0
234	TRUE	Empty	Isoform 2 of Protein KRBA1 OS=Homo sapiens GN=KRBA1	sp|A5PL33-2|KRBA1_HUMAN (+2)		107 kDa		unknown	1.0101	0
238	TRUE	Empty	Peroxiredoxin-1 OS=Homo sapiens GN=PRDX1 PE=1 SV=1	sp|Q06830|PRDX1_HUMANPeroxiredoxin-1 OS=Homo sapiens GN=PRDX1 PE=1 SV=1		?	TRUE	unknown	1.0101	0
240	TRUE	Empty	Isoform 2 of von Willebrand factor D and EGF domain-containing protein OS=Homo sapiens GN=VWDE	sp|Q8N2E2-3|VWDE_HUMAN (+1)		116 kDa		unknown	1.0101	0
249	TRUE	Empty	U6 snRNA-associated Sm-like protein LSm8 OS=Homo sapiens GN=LSM8 PE=1 SV=3	LSM8_HUMAN		10 kDa		unknown	1.0101	0
250	TRUE	Empty	60S ribosomal protein L5 OS=Homo sapiens GN=RPL5 PE=1 SV=3	RL5_HUMAN		34 kDa		unknown	1.0101	0
251	TRUE	Empty	Short-chain specific acyl-CoA dehydrogenase, mitochondrial OS=Homo sapiens GN=ACADS PE=1 SV=1	sp|P16219|ACADS_HUMANShort-chain specific acyl-CoA dehydrogenase, mitochondrial OS=Homo sapiens GN=ACADS PE=1 SV=1		?		unknown	1.0101	0
252	TRUE	Empty	Flavin reductase (NADPH) OS=Homo sapiens GN=BLVRB PE=1 SV=3	sp|P30043|BLVRB_HUMANFlavin reductase (NADPH) OS=Homo sapiens GN=BLVRB PE=1 SV=3		?		unknown	1.0101	0
253	TRUE	Empty	Isoform 2 of T-complex protein 1 subunit beta OS=Homo sapiens GN=CCT2	sp|P78371-2|TCPB_HUMAN (+1)		53 kDa		unknown	1.0101	0
254	TRUE	Empty	Histone H2A type 2-C OS=Homo sapiens GN=HIST2H2AC PE=1 SV=4	sp|Q16777|H2A2C_HUMANHistone H2A type 2-C OS=Homo sapiens GN=HIST2H2AC PE=1 SV=4 (+1)		?		unknown	1.0101	0
255	TRUE	Empty	Acyl-CoA dehydrogenase family member 9, mitochondrial OS=Homo sapiens GN=ACAD9 PE=1 SV=1	sp|Q9H845|ACAD9_HUMANAcyl-CoA dehydrogenase family member 9, mitochondrial OS=Homo sapiens GN=ACAD9 PE=1 SV=1		?		unknown	1.0101	0
256	TRUE	Empty	Isoform 2 of Thioredoxin reductase 2, mitochondrial OS=Homo sapiens GN=TXNRD2	sp|Q9NNW7-2|TRXR2_HUMAN (+2)		54 kDa		unknown	1.0101	0
257	TRUE	Empty	Isoform 2 of Proteasome subunit alpha type-7 OS=Homo sapiens GN=PSMA7	sp|O14818-2|PSA7_HUMAN (+1)		20 kDa	TRUE	unknown	1.0101	0
264	TRUE	Empty	Calmodulin-like protein 5 OS=Homo sapiens GN=CALML5 PE=1 SV=2	sp|Q9NZT1|CALL5_HUMANCalmodulin-like protein 5 OS=Homo sapiens GN=CALML5 PE=1 SV=2		?		unknown	1.0101	0
268	TRUE	Empty	Mitochondrial-processing peptidase subunit beta OS=Homo sapiens GN=PMPCB PE=1 SV=2	MPPB_HUMAN		54 kDa		unknown	1.0101	0
END OF FILE

## Sheet: >2.5 fold cutoff 
#	Visible?	Starred?	Identified Proteins (358/369)	Protein name	Alternate ID	Molecular Weight	Protein Grouping Ambiguity	Taxonomy	YW_1.raw (F005912)	YW_2.raw (F005913)	2.5
41.2	TRUE	Empty	78 kDa glucose-regulated protein OS=Homo sapiens GN=HSPA5 PE=1 SV=2	HSPA5		72 kDa	TRUE	unknown	0	39.604	39.604
7.2	TRUE	Empty	Keratin, type I cytoskeletal 10 OS=Homo sapiens GN=KRT10 PE=1 SV=6	KRT10		59 kDa	TRUE	unknown	0	37.624	37.624
67.2	TRUE	Empty	Stress-70 protein, mitochondrial OS=Homo sapiens GN=HSPA9 PE=1 SV=2	HSPA9		74 kDa	TRUE	unknown	0	34.654	34.654
5.5	TRUE	Empty	Heat shock-related 70 kDa protein 2 OS=Homo sapiens GN=HSPA2 PE=1 SV=1	HSPA2		70 kDa	TRUE	unknown	0	31.683	31.683
18	TRUE	Empty	Cluster of T-cell activation inhibitor, mitochondrial OS=Homo sapiens GN=TCAIM PE=2 SV=2 (sp|Q8N3R3|TCAIM_HUMAN)	TCAIM		58 kDa	TRUE	unknown	0	24.753	24.753
18.1	TRUE	Empty	T-cell activation inhibitor, mitochondrial OS=Homo sapiens GN=TCAIM PE=2 SV=2	TCAIM		58 kDa	TRUE	unknown	0	24.753	24.753
15	TRUE	Empty	Cluster of 2-oxoglutarate dehydrogenase, mitochondrial OS=Homo sapiens GN=OGDH PE=1 SV=3 (sp|Q02218|ODO1_HUMAN)	OGDH		116 kDa	TRUE	unknown	2.0202	22.772	22.772
15.1	TRUE	Empty	2-oxoglutarate dehydrogenase, mitochondrial OS=Homo sapiens GN=OGDH PE=1 SV=3	OGDH		116 kDa	TRUE	unknown	1.0101	22.772	22.772
1.12	TRUE	Empty	Keratin, type II cytoskeletal 6B OS=Homo sapiens GN=KRT6B PE=1 SV=5	KRT6B		60 kDa	TRUE	unknown	0	21.782	21.782
20	TRUE	Empty	Dihydrolipoyllysine-residue succinyltransferase component of 2-oxoglutarate dehydrogenase complex, mitochondrial OS=Homo sapiens GN=DLST PE=1 SV=4	DLST		49 kDa		unknown	0	18.812	18.812
7.7	TRUE	Empty	Keratin, type I cytoskeletal 14 OS=Homo sapiens GN=KRT14 PE=1 SV=4	KRT14		52 kDa	TRUE	unknown	0	18.812	18.812
1.17	TRUE	Empty	Keratin, type II cytoskeletal 6C OS=Homo sapiens GN=KRT6C PE=1 SV=3	KRT6C		60 kDa	TRUE	unknown	0	16.832	16.832
7.8	TRUE	Empty	Keratin, type I cytoskeletal 16 OS=Homo sapiens GN=KRT16 PE=1 SV=4	KRT16		51 kDa	TRUE	unknown	0	16.832	16.832
18.2	TRUE	Empty	Isoform 4 of T-cell activation inhibitor, mitochondrial OS=Homo sapiens GN=TCAIM	TCAIM		41 kDa	TRUE	unknown	0	13.861	13.861
7.9	TRUE	Empty	Keratin, type I cytoskeletal 17 OS=Homo sapiens GN=KRT17 PE=1 SV=2	KRT17		48 kDa	TRUE	unknown	0	12.871	12.871
28	TRUE	Empty	Isoform 3 of Dihydrolipoyl dehydrogenase, mitochondrial OS=Homo sapiens GN=DLD	DLD		49 kDa		unknown	1.0101	8.9109	8.9109
7.1	TRUE	Empty	Keratin, type I cytoskeletal 27 OS=Homo sapiens GN=KRT27 PE=1 SV=2	KRT27		50 kDa	TRUE	unknown	0	7.9208	7.9208
54	TRUE	Empty	Cartilage-associated protein OS=Homo sapiens GN=CRTAP PE=1 SV=1	CRTAP		47 kDa	TRUE	unknown	0	7.9208	7.9208
103	TRUE	Empty	Heterogeneous nuclear ribonucleoprotein H OS=Homo sapiens GN=HNRNPH1 PE=1 SV=4	HNRNPH1		49 kDa	TRUE	unknown	0	6.9307	6.9307
1.1	TRUE	Empty	Keratin, type II cytoskeletal 7 OS=Homo sapiens GN=KRT7 PE=1 SV=5	KRT7		51 kDa	TRUE	unknown	1.0101	5.9406	5.9406
15.2	TRUE	Empty	Isoform 2 of 2-oxoglutarate dehydrogenase-like, mitochondrial OS=Homo sapiens GN=OGDHL	OGDHL		108 kDa	TRUE	unknown	2.0202	5.9406	5.9406
60	TRUE	Empty	Isoform 2 of ATP-dependent RNA helicase DDX3X OS=Homo sapiens GN=DDX3X	DDX3X		71 kDa		unknown	0	5.9406	5.9406
97.2	TRUE	Empty	DnaJ homolog subfamily C member 8 OS=Homo sapiens GN=DNAJC8 PE=1 SV=2	DNAJC8		30 kDa	TRUE	unknown	0	5.9406	5.9406
29.2	TRUE	Empty	Isoform 2 of Polyadenylate-binding protein 4 OS=Homo sapiens GN=PABPC4	PABPC4		70 kDa	TRUE	unknown	0	4.9505	4.9505
1.18	TRUE	Empty	SWISS-PROT:Q3TTY5 Tax_Id=10090 Gene_Symbol=Krt2 Keratin, type II cytoskeletal 2 epidermal	SWISS-PROT:Q3TTY5 Tax_Id=10090 Gene_Symbol=Krt2 Keratin, type II cytoskeletal 2 epidermal		?	TRUE	unknown	0	4.9505	4.9505
1.6	TRUE	Empty	Isoform 2 of Keratin, type II cytoskeletal 80 OS=Homo sapiens GN=KRT80	KRT80		47 kDa	TRUE	unknown	2.0202	4.9505	4.9505
1.19	TRUE	Empty	SWISS-PROT:Q9DCV7 Tax_Id=10090 Gene_Symbol=Krt7 Keratin, type II cytoskeletal 7	SWISS-PROT:Q9DCV7 Tax_Id=10090 Gene_Symbol=Krt7 Keratin, type II cytoskeletal 7		?	TRUE	unknown	0	4.9505	4.9505
7.11	TRUE	Empty	SWISS-PROT:P19001 Tax_Id=10090 Gene_Symbol=Krt19 Keratin, type I cytoskeletal 19	SWISS-PROT:P19001 Tax_Id=10090 Gene_Symbol=Krt19 Keratin, type I cytoskeletal 19		?	TRUE	unknown	0	4.9505	4.9505
70.2	TRUE	Empty	Ataxin-2-like protein OS=Homo sapiens GN=ATXN2L PE=1 SV=2	ATXN2L		113 kDa	TRUE	unknown	0	3.9604	3.9604
100	TRUE	Empty	28S ribosomal protein S36, mitochondrial OS=Homo sapiens GN=MRPS36 PE=1 SV=2	MRPS36		11 kDa		unknown	0	3.9604	3.9604
117	TRUE	Empty	Isoform 2 of Heterogeneous nuclear ribonucleoprotein H3 OS=Homo sapiens GN=HNRNPH3	HNRNPH3		35 kDa	TRUE	unknown	0	3.9604	3.9604
115	TRUE	Empty	RNA-binding protein 14 OS=Homo sapiens GN=RBM14 PE=1 SV=2	RBM14		69 kDa		unknown	0	3.9604	3.9604
70	TRUE	Empty	Cluster of Isoform 2 of Ataxin-2-like protein OS=Homo sapiens GN=ATXN2L (sp|Q8WWM7-2|ATX2L_HUMAN)	ATXN2L		112 kDa	TRUE	unknown	1.0101	3.9604	3.9604
70.1	TRUE	Empty	Isoform 2 of Ataxin-2-like protein OS=Homo sapiens GN=ATXN2L	ATXN2L		112 kDa	TRUE	unknown	1.0101	3.9604	3.9604
78	TRUE	Empty	Isoform 2 of Pleiotropic regulator 1 OS=Homo sapiens GN=PLRG1	PLRG1		56 kDa		unknown	1.0101	3.9604	3.9604
85	TRUE	Empty	Cluster of Dermcidin OS=Homo sapiens GN=DCD PE=1 SV=2 (sp|P81605|DCD_HUMAN)	DCD		11 kDa	TRUE	unknown	2.0202	3.9604	3.9604
85.1	TRUE	Empty	Dermcidin OS=Homo sapiens GN=DCD PE=1 SV=2	DCD		11 kDa	TRUE	unknown	2.0202	3.9604	3.9604
85.2	TRUE	Empty	Isoform 2 of Dermcidin OS=Homo sapiens GN=DCD	DCD		12 kDa	TRUE	unknown	0	3.9604	3.9604
87	TRUE	Empty	Isoform Gamma-2 of Serine/threonine-protein phosphatase PP1-gamma catalytic subunit OS=Homo sapiens GN=PPP1CC	PPP1CC		39 kDa		unknown	1.0101	3.9604	3.9604
88	TRUE	Empty	Isoform 2 of PEST proteolytic signal-containing nuclear protein OS=Homo sapiens GN=PCNP	PCNP		14 kDa		unknown	1.0101	3.9604	3.9604
59	TRUE	Empty	40S ribosomal protein SA OS=Homo sapiens GN=RPSA PE=1 SV=4	RPSA		33 kDa		unknown	2.0202	2.9703	2.9703
73	TRUE	Empty	BAG family molecular chaperone regulator 3 OS=Homo sapiens GN=BAG3 PE=1 SV=3	BAG3		62 kDa		unknown	0	2.9703	2.9703
127	TRUE	Empty	Cleavage and polyadenylation specificity factor subunit 5 OS=Homo sapiens GN=NUDT21 PE=1 SV=1	NUDT21		26 kDa	TRUE	unknown	0	2.9703	2.9703
98	TRUE	Empty	Isoform 2 of Heterogeneous nuclear ribonucleoprotein A/B OS=Homo sapiens GN=HNRNPAB	HNRNPAB		36 kDa		unknown	0	2.9703	2.9703
57	TRUE	Empty	Mitochondrial 2-oxoglutarate/malate carrier protein OS=Homo sapiens GN=SLC25A11 PE=1 SV=3	SLC25A11		34 kDa		unknown	2.0202	2.9703	2.9703
86	TRUE	Empty	Replication protein A 70 kDa DNA-binding subunit OS=Homo sapiens GN=RPA1 PE=1 SV=2	RPA1		68 kDa		unknown	0	2.9703	2.9703
101	TRUE	Empty	RNA-binding protein FUS OS=Homo sapiens GN=FUS PE=1 SV=1	FUS		53 kDa		unknown	0	2.9703	2.9703
1.23	TRUE	Empty	TREMBL:Q6ISB0 Keratin, hair, basic, 4 - Homo sapiens (Human).	TREMBL:Q6ISB0 Keratin, hair, basic, 4 - Homo sapiens (Human).		?	TRUE	unknown	0	2.9703	2.9703
7.13	TRUE	Empty	Keratin, type I cytoskeletal 28 OS=Homo sapiens GN=KRT28 PE=1 SV=2	KRT28		51 kDa	TRUE	unknown	0	2.9703	2.9703
116	TRUE	Empty	Isoform 2 of Heterogeneous nuclear ribonucleoprotein A3 OS=Homo sapiens GN=HNRNPA3	HNRNPA3		37 kDa	TRUE	unknown	0	2.9703	2.9703
126	TRUE	Empty	Cluster of Peroxiredoxin-1 OS=Homo sapiens GN=PRDX1 PE=1 SV=1 (PRDX1_HUMAN)	PRDX1		22 kDa	TRUE	unknown	0	2.9703	2.9703
126.1	TRUE	Empty	Peroxiredoxin-1 OS=Homo sapiens GN=PRDX1 PE=1 SV=1	PRDX1		22 kDa	TRUE	unknown	0	2.9703	2.9703
1.2	TRUE	Empty	(Bos taurus) 63 kDa protein	(Bos taurus) 63 kDa protein		?	TRUE	unknown	20.202	0	0
2.1	TRUE	Empty	Actin, alpha cardiac muscle 1 OS=Homo sapiens GN=ACTC1 PE=1 SV=1	ACTC1		42 kDa	TRUE	unknown	58.586	47.525	0
2.2	TRUE	Empty	Actin, cytoplasmic 1 OS=Homo sapiens GN=ACTB PE=1 SV=1	ACTB		42 kDa	TRUE	unknown	23.232	22.772	0
56.1	TRUE	Empty	ADP/ATP translocase 1 OS=Homo sapiens GN=SLC25A4 PE=1 SV=4	SLC25A4		33 kDa	TRUE	unknown	34.343	16.832	0
56.2	TRUE	Empty	ADP/ATP translocase 2 OS=Homo sapiens GN=SLC25A5 PE=1 SV=7	SLC25A5		33 kDa	TRUE	unknown	35.353	15.842	0
23.2	TRUE	Empty	Alpha-actinin-3 OS=Homo sapiens GN=ACTN3 PE=1 SV=2	ACTN3		?	TRUE	unknown	5.0505	0	0
36.2	TRUE	Empty	Alpha-enolase OS=Homo sapiens GN=ENO1 PE=1 SV=2	ENO1		47 kDa	TRUE	unknown	2.0202	1.9802	0
49.3	TRUE	Empty	ATP-dependent RNA helicase DDX39A OS=Homo sapiens GN=DDX39A PE=1 SV=2	DDX39A		?	TRUE	unknown	2.0202	0	0
2.4	TRUE	Empty	Beta-actin-like protein 2 OS=Homo sapiens GN=ACTBL2 PE=1 SV=2	ACTBL2		?	TRUE	unknown	20.202	0	0
23.1	TRUE	Empty	Isoform 2 of Alpha-actinin-2 OS=Homo sapiens GN=ACTN2	ACTN2		104 kDa	TRUE	unknown	14.141	9.901	0
46.2	TRUE	Empty	Isoform 2 of Glycogen phosphorylase, liver form OS=Homo sapiens GN=PYGL	PYGL		93 kDa	TRUE	unknown	5.0505	3.9604	0
49.1	TRUE	Empty	Isoform 2 of Spliceosome RNA helicase DDX39B OS=Homo sapiens GN=DDX39B	DDX39B		51 kDa	TRUE	unknown	3.0303	3.9604	0
1.1	TRUE	Empty	Keratin, type II cytoskeletal 1 OS=Homo sapiens GN=KRT1 PE=1 SV=6	KRT1		66 kDa	TRUE	unknown	97.979	80.198	0
1.2	TRUE	Empty	Keratin, type II cytoskeletal 2 epidermal OS=Homo sapiens GN=KRT2 PE=1 SV=2	KRT2		65 kDa	TRUE	unknown	32.323	31.683	0
1.3	TRUE	Empty	Keratin, type II cytoskeletal 5 OS=Homo sapiens GN=KRT5 PE=1 SV=3	KRT5		62 kDa	TRUE	unknown	15.151	14.852	0
29.4	TRUE	Empty	Polyadenylate-binding protein 3 OS=Homo sapiens GN=PABPC3 PE=1 SV=2	PABPC3		?	TRUE	unknown	2.0202	0	0
2.5	TRUE	Empty	POTE ankyrin domain family member I OS=Homo sapiens GN=POTEI PE=3 SV=1	POTEI		?	TRUE	unknown	2.0202	0	0
2.8	TRUE	Empty	Putative beta-actin-like protein 3 OS=Homo sapiens GN=POTEKP PE=5 SV=1	POTEKP		?	TRUE	unknown	0	0	0
7.4	TRUE	Empty	SWISS-PROT:P02533 Tax_Id=9606 Gene_Symbol=KRT14 Keratin, type I cytoskeletal 14	SWISS-PROT:P02533 Tax_Id=9606 Gene_Symbol=KRT14 Keratin, type I cytoskeletal 14		?	TRUE	unknown	17.172	0	0
7.17	TRUE	Empty	SWISS-PROT:P02535-1 Tax_Id=10090 Gene_Symbol=Krt10 Isoform 1 of Keratin, type I cytoskeletal 10	SWISS-PROT:P02535-1 Tax_Id=10090 Gene_Symbol=Krt10 Isoform 1 of Keratin, type I cytoskeletal 10		?	TRUE	unknown	0	0	0
7.14	TRUE	Empty	SWISS-PROT:P08727 Tax_Id=9606 Gene_Symbol=KRT19 Keratin, type I cytoskeletal 19	SWISS-PROT:P08727 Tax_Id=9606 Gene_Symbol=KRT19 Keratin, type I cytoskeletal 19		?	TRUE	unknown	3.0303	0	0
7.5	TRUE	Empty	SWISS-PROT:P08779 Tax_Id=9606 Gene_Symbol=KRT16 Keratin, type I cytoskeletal 16	SWISS-PROT:P08779 Tax_Id=9606 Gene_Symbol=KRT16 Keratin, type I cytoskeletal 16		?	TRUE	unknown	14.141	0	0
7.1	TRUE	Empty	SWISS-PROT:P13645 Tax_Id=9606 Gene_Symbol=KRT10 Keratin, type I cytoskeletal 10	SWISS-PROT:P13645 Tax_Id=9606 Gene_Symbol=KRT10 Keratin, type I cytoskeletal 10		?	TRUE	unknown	54.545	0	0
7.6	TRUE	Empty	SWISS-PROT:Q04695 Tax_Id=9606 Gene_Symbol=KRT17 Keratin, type I cytoskeletal 17	SWISS-PROT:Q04695 Tax_Id=9606 Gene_Symbol=KRT17 Keratin, type I cytoskeletal 17		?	TRUE	unknown	9.0909	0	0
1.5	TRUE	Empty	SWISS-PROT:Q6IFZ6 Tax_Id=10090 Gene_Symbol=Krt77 Keratin, type II cytoskeletal 1b	SWISS-PROT:Q6IFZ6 Tax_Id=10090 Gene_Symbol=Krt77 Keratin, type II cytoskeletal 1b		?	TRUE	unknown	9.0909	8.9109	0
1.4	TRUE	Empty	SWISS-PROT:Q7Z794 Tax_Id=9606 Gene_Symbol=KRT77 Keratin 77	SWISS-PROT:Q7Z794 Tax_Id=9606 Gene_Symbol=KRT77 Keratin 77		?	TRUE	unknown	12.121	0	0
1.9	TRUE	Empty	Vimentin OS=Homo sapiens GN=VIM PE=1 SV=4	VIM		54 kDa	TRUE	unknown	1.0101	0.9901	0
183	TRUE	Empty	(Bos taurus) 55 kDa protein	(Bos taurus) 55 kDa protein		?		unknown	1.0101	0	0
161	TRUE	Empty	10 kDa heat shock protein, mitochondrial OS=Homo sapiens GN=HSPE1 PE=1 SV=2	HSPE1		11 kDa		unknown	0	1.9802	0
34	TRUE	Empty	40S ribosomal protein S12 OS=Homo sapiens GN=RPS12 PE=1 SV=3	RPS12		15 kDa		unknown	5.0505	6.9307	0
200	TRUE	Empty	40S ribosomal protein S14 OS=Homo sapiens GN=RPS14 PE=1 SV=3	RPS14		16 kDa		unknown	0	0.9901	0
223	TRUE	Empty	40S ribosomal protein S18 OS=Homo sapiens GN=RPS18 PE=1 SV=3	RPS18		18 kDa		unknown	0	0.9901	0
198	TRUE	Empty	40S ribosomal protein S19 OS=Homo sapiens GN=RPS19 PE=1 SV=2	RPS19		16 kDa		unknown	0	0.9901	0
243	TRUE	Empty	40S ribosomal protein S25 OS=Homo sapiens GN=RPS25 PE=1 SV=1	RPS25		14 kDa		unknown	0	0.9901	0
129	TRUE	Empty	40S ribosomal protein S28 OS=Homo sapiens GN=RPS28 PE=1 SV=1	RPS28		8 kDa		unknown	1.0101	1.9802	0
40	TRUE	Empty	60 kDa heat shock protein, mitochondrial OS=Homo sapiens GN=HSPD1 PE=1 SV=2	HSPD1		61 kDa		unknown	3.0303	4.9505	0
235	TRUE	Empty	60S acidic ribosomal protein P2 OS=Homo sapiens GN=RPLP2 PE=1 SV=1	RPLP2		12 kDa		unknown	0	0.9901	0
272	TRUE	Empty	60S ribosomal protein L29 OS=Homo sapiens GN=RPL29 PE=1 SV=2	RPL29		18 kDa		unknown	0	0.9901	0
250	TRUE	Empty	60S ribosomal protein L5 OS=Homo sapiens GN=RPL5 PE=1 SV=3	RPL5		34 kDa		unknown	1.0101	0	0
118	TRUE	Empty	Aconitate hydratase, mitochondrial OS=Homo sapiens GN=ACO2 PE=1 SV=2	ACO2		85 kDa		unknown	2.0202	0	0
255	TRUE	Empty	Acyl-CoA dehydrogenase family member 9, mitochondrial OS=Homo sapiens GN=ACAD9 PE=1 SV=1	ACAD9		?		unknown	1.0101	0	0
212	TRUE	Empty	Aldehyde dehydrogenase, mitochondrial OS=Homo sapiens GN=ALDH2 PE=1 SV=2	ALDH2		?		unknown	1.0101	0.9901	0
231	TRUE	Empty	Annexin A5 OS=Homo sapiens GN=ANXA5 PE=1 SV=2	ANXA5		36 kDa		unknown	0	0.9901	0
12	TRUE	Empty	ATP synthase subunit beta, mitochondrial OS=Homo sapiens GN=ATP5B PE=1 SV=3	ATP5B		57 kDa		unknown	28.283	15.842	0
92	TRUE	Empty	ATP-dependent RNA helicase DDX1 OS=Homo sapiens GN=DDX1 PE=1 SV=2	DDX1		82 kDa		unknown	0	0.9901	0
219	TRUE	Empty	Bifunctional glutamate/proline--tRNA ligase OS=Homo sapiens GN=EPRS PE=1 SV=5	EPRS		171 kDa		unknown	1.0101	0	0
230	TRUE	Empty	Calreticulin OS=Homo sapiens GN=CALR PE=1 SV=1	CALR		48 kDa		unknown	1.0101	0	0
258	TRUE	Empty	Carnitine O-palmitoyltransferase 2, mitochondrial OS=Homo sapiens GN=CPT2 PE=1 SV=2	CPT2		74 kDa		unknown	0	0.9901	0
248	TRUE	Empty	CDGSH iron-sulfur domain-containing protein 1 OS=Homo sapiens GN=CISD1 PE=1 SV=1	CISD1		?		unknown	0	0.9901	0
21	TRUE	Empty	Citrate synthase, mitochondrial OS=Homo sapiens GN=CS PE=1 SV=2	CS		52 kDa		unknown	9.0909	7.9208	0
142	TRUE	Empty	Cleavage and polyadenylation specificity factor subunit 5 OS=Homo sapiens GN=NUDT21 PE=1 SV=1	NUDT21		?	TRUE	unknown	2.0202	0	0
7	TRUE	Empty	Cluster of SWISS-PROT:P13645 Tax_Id=9606 Gene_Symbol=KRT10 Keratin, type I cytoskeletal 10 (sp|P13645|K1C10_HUMANKeratin, type I cytoskeletal 10 OS=Homo sapiens GN=KRT10 PE=1 SV=6)	KRT10		?	TRUE	unknown	75.757	62.376	0
241	TRUE	Empty	Complement C1q subcomponent subunit B OS=Homo sapiens GN=C1QB PE=1 SV=3	C1QB		27 kDa		unknown	0	0.9901	0
237	TRUE	Empty	Cysteine and glycine-rich protein 2 OS=Homo sapiens GN=CSRP2 PE=1 SV=3	CSRP2		?		unknown	0	0.9901	0
71	TRUE	Empty	Cytochrome b-c1 complex subunit 1, mitochondrial OS=Homo sapiens GN=UQCRC1 PE=1 SV=3	UQCRC1		53 kDa		unknown	2.0202	0.9901	0
79	TRUE	Empty	Cytoplasmic dynein 1 heavy chain 1 OS=Homo sapiens GN=DYNC1H1 PE=1 SV=5	DYNC1H1		?		unknown	2.0202	0.9901	0
260	TRUE	Empty	DnaJ homolog subfamily C member 9 OS=Homo sapiens GN=DNAJC9 PE=1 SV=1	DNAJC9		30 kDa		unknown	0	0.9901	0
96	TRUE	Empty	Elongation factor Tu, mitochondrial OS=Homo sapiens GN=TUFM PE=1 SV=2	TUFM		50 kDa		unknown	3.0303	1.9802	0
38	TRUE	Empty	Enhancer of rudimentary homolog OS=Homo sapiens GN=ERH PE=1 SV=1	ERH		12 kDa		unknown	7.0707	5.9406	0
196	TRUE	Empty	Eukaryotic translation initiation factor 3 subunit H OS=Homo sapiens GN=EIF3H PE=1 SV=1	EIF3H		40 kDa		unknown	0	0.9901	0
252	TRUE	Empty	Flavin reductase (NADPH) OS=Homo sapiens GN=BLVRB PE=1 SV=3	BLVRB		?		unknown	1.0101	0	0
192	TRUE	Empty	Glutamate-rich WD repeat-containing protein 1 OS=Homo sapiens GN=GRWD1 PE=1 SV=1	GRWD1		49 kDa	TRUE	unknown	0	0.9901	0
179	TRUE	Empty	Glutaredoxin-3 OS=Homo sapiens GN=GLRX3 PE=1 SV=2	GLRX3		?		unknown	1.0101	0.9901	0
45	TRUE	Empty	Glyceraldehyde-3-phosphate dehydrogenase OS=Homo sapiens GN=GAPDH PE=1 SV=3	GAPDH		36 kDa		unknown	3.0303	0.9901	0
228	TRUE	Empty	Heat shock 70 kDa protein 4 OS=Homo sapiens GN=HSPA4 PE=1 SV=4	HSPA4		?		unknown	0	0.9901	0
190	TRUE	Empty	Heterogeneous nuclear ribonucleoprotein F OS=Homo sapiens GN=HNRNPF PE=1 SV=3	HNRNPF		?	TRUE	unknown	3.0303	0	0
30	TRUE	Empty	Heterogeneous nuclear ribonucleoproteins A2/B1 OS=Homo sapiens GN=HNRNPA2B1 PE=1 SV=2	HNRNPA2B1		37 kDa		unknown	5.0505	6.9307	0
99	TRUE	Empty	Hornerin OS=Homo sapiens GN=HRNR PE=1 SV=2	HRNR		282 kDa		unknown	3.0303	0.9901	0
214	TRUE	Empty	Hydroxysteroid dehydrogenase-like protein 2 OS=Homo sapiens GN=HSDL2 PE=1 SV=1	HSDL2		?		unknown	1.0101	0.9901	0
93	TRUE	Empty	Immunoglobulin kappa variable 2D-26 OS=Homo sapiens GN=IGKV2D-26 PE=3 SV=1	IGKV2D-26		13 kDa		unknown	1.0101	0.9901	0
261	TRUE	Empty	Isochorismatase domain-containing protein 1 OS=Homo sapiens GN=ISOC1 PE=1 SV=3	ISOC1		?		unknown	0	0.9901	0
151	TRUE	Empty	Isoform 1 of Vinculin OS=Homo sapiens GN=VCL	VCL		117 kDa		unknown	1.0101	0	0
213	TRUE	Empty	Isoform 1 of Voltage-dependent anion-selective channel protein 2 OS=Homo sapiens GN=VDAC2	VDAC2		33 kDa		unknown	1.0101	0	0
263	TRUE	Empty	Isoform 2 of Acidic leucine-rich nuclear phosphoprotein 32 family member B OS=Homo sapiens GN=ANP32B	ANP32B		22 kDa		unknown	0	0.9901	0
62	TRUE	Empty	Isoform 2 of ATP-dependent 6-phosphofructokinase, muscle type OS=Homo sapiens GN=PFKM	PFKM		82 kDa		unknown	3.0303	2.9703	0
189	TRUE	Empty	Isoform 2 of BAG family molecular chaperone regulator 4 OS=Homo sapiens GN=BAG4	BAG4		45 kDa		unknown	0	1.9802	0
152	TRUE	Empty	Isoform 2 of Calcium-binding mitochondrial carrier protein Aralar2 OS=Homo sapiens GN=SLC25A13	SLC25A13		74 kDa		unknown	2.0202	0	0
104	TRUE	Empty	Isoform 2 of Cleavage and polyadenylation specificity factor subunit 6 OS=Homo sapiens GN=CPSF6	CPSF6		63 kDa		unknown	1.0101	1.9802	0
191	TRUE	Empty	Isoform 2 of Heterogeneous nuclear ribonucleoprotein D0 OS=Homo sapiens GN=HNRNPD	HNRNPD		36 kDa	TRUE	unknown	0	1.9802	0
186	TRUE	Empty	Isoform 2 of Heterogeneous nuclear ribonucleoprotein D-like OS=Homo sapiens GN=HNRNPDL	HNRNPDL		34 kDa	TRUE	unknown	0	0.9901	0
102	TRUE	Empty	Isoform 2 of Heterogeneous nuclear ribonucleoprotein U OS=Homo sapiens GN=HNRNPU	HNRNPU		89 kDa		unknown	0	1.9802	0
137	TRUE	Empty	Isoform 2 of Hydroxyacyl-coenzyme A dehydrogenase, mitochondrial OS=Homo sapiens GN=HADH	HADH		42 kDa		unknown	2.0202	0.9901	0
64	TRUE	Empty	Isoform 2 of MICOS complex subunit MIC60 OS=Homo sapiens GN=IMMT	IMMT		83 kDa		unknown	3.0303	1.9802	0
266	TRUE	Empty	Isoform 2 of mRNA cap guanine-N7 methyltransferase OS=Homo sapiens GN=RNMT	RNMT		58 kDa		unknown	0	0.9901	0
162	TRUE	Empty	Isoform 2 of NADH dehydrogenase [ubiquinone] flavoprotein 1, mitochondrial OS=Homo sapiens GN=NDUFV1	NDUFV1		50 kDa		unknown	2.0202	0.9901	0
141	TRUE	Empty	Isoform 2 of NADH dehydrogenase [ubiquinone] iron-sulfur protein 2, mitochondrial OS=Homo sapiens GN=NDUFS2	NDUFS2		52 kDa		unknown	2.0202	0.9901	0
232	TRUE	Empty	Isoform 2 of Peptidylprolyl isomerase domain and WD repeat-containing protein 1 OS=Homo sapiens GN=PPWD1	PPWD1		56 kDa		unknown	0	0.9901	0
242	TRUE	Empty	Isoform 2 of Protein LSM12 homolog OS=Homo sapiens GN=LSM12	LSM12		22 kDa		unknown	0	0.9901	0
195	TRUE	Empty	Isoform 2 of Protein-L-isoaspartate(D-aspartate) O-methyltransferase OS=Homo sapiens GN=PCMT1	PCMT1		25 kDa		unknown	0	0.9901	0
229	TRUE	Empty	Isoform 2 of Pyruvate dehydrogenase E1 component subunit beta, mitochondrial OS=Homo sapiens GN=PDHB	PDHB		37 kDa		unknown	0	0.9901	0
169	TRUE	Empty	Isoform 2 of Regulator of nonsense transcripts 3B OS=Homo sapiens GN=UPF3B	UPF3B		56 kDa		unknown	0	0.9901	0
53	TRUE	Empty	Isoform 2 of Serine-threonine kinase receptor-associated protein OS=Homo sapiens GN=STRAP	STRAP		40 kDa		unknown	4.0404	3.9604	0
194	TRUE	Empty	Isoform 2 of Small nuclear ribonucleoprotein Sm D3 OS=Homo sapiens GN=SNRPD3	SNRPD3		13 kDa		unknown	0	1.9802	0
136	TRUE	Empty	Isoform 2 of Succinate-semialdehyde dehydrogenase, mitochondrial OS=Homo sapiens GN=ALDH5A1	ALDH5A1		59 kDa		unknown	2.0202	0.9901	0
256	TRUE	Empty	Isoform 2 of Thioredoxin reductase 2, mitochondrial OS=Homo sapiens GN=TXNRD2	TXNRD2		54 kDa		unknown	1.0101	0	0
25	TRUE	Empty	Isoform 2 of Trifunctional enzyme subunit beta, mitochondrial OS=Homo sapiens GN=HADHB	HADHB		49 kDa		unknown	11.111	7.9208	0
26	TRUE	Empty	Isoform 2 of Very long-chain specific acyl-CoA dehydrogenase, mitochondrial OS=Homo sapiens GN=ACADVL	ACADVL		68 kDa		unknown	11.111	9.901	0
89	TRUE	Empty	Isoform 3 of L-lactate dehydrogenase A chain OS=Homo sapiens GN=LDHA	LDHA		40 kDa		unknown	3.0303	3.9604	0
27	TRUE	Empty	Isoform A1-A of Heterogeneous nuclear ribonucleoprotein A1 OS=Homo sapiens GN=HNRNPA1	HNRNPA1		34 kDa	TRUE	unknown	4.0404	8.9109	0
68	TRUE	Empty	Isoform B of Phosphate carrier protein, mitochondrial OS=Homo sapiens GN=SLC25A3	SLC25A3		40 kDa		unknown	4.0404	3.9604	0
63	TRUE	Empty	Isoform Cytoplasmic of Fumarate hydratase, mitochondrial OS=Homo sapiens GN=FH	FH		50 kDa		unknown	2.0202	1.9802	0
8	TRUE	Empty	Isoform Ex1A-2-3 of AMP deaminase 2 OS=Homo sapiens GN=AMPD2	AMPD2		92 kDa	TRUE	unknown	13.131	20.792	0
181	TRUE	Empty	Isoform Short of Ubiquitin carboxyl-terminal hydrolase 5 OS=Homo sapiens GN=USP5	USP5		93 kDa		unknown	1.0101	1.9802	0
44	TRUE	Empty	Junction plakoglobin OS=Homo sapiens GN=JUP PE=1 SV=3	JUP		82 kDa	TRUE	unknown	7.0707	2.9703	0
4	TRUE	Empty	Keratin, type I cytoskeletal 9 OS=Homo sapiens GN=KRT9 PE=1 SV=3	KRT9		62 kDa	TRUE	unknown	38.384	36.634	0
37	TRUE	Empty	L-lactate dehydrogenase B chain OS=Homo sapiens GN=LDHB PE=1 SV=2	LDHB		37 kDa		unknown	7.0707	4.9505	0
143	TRUE	Empty	Lupus La protein OS=Homo sapiens GN=SSB PE=1 SV=2	SSB		47 kDa		unknown	2.0202	0	0
147	TRUE	Empty	Malate dehydrogenase, mitochondrial OS=Homo sapiens GN=MDH2 PE=1 SV=3	MDH2		36 kDa		unknown	1.0101	0.9901	0
164	TRUE	Empty	Mapk-regulated corepressor-interacting protein 1 OS=Homo sapiens GN=MCRIP1 PE=1 SV=1	MCRIP1		11 kDa		unknown	0	0.9901	0
182	TRUE	Empty	Mitochondrial carrier homolog 2 OS=Homo sapiens GN=MTCH2 PE=1 SV=1	MTCH2		?		unknown	1.0101	0.9901	0
268	TRUE	Empty	Mitochondrial-processing peptidase subunit beta OS=Homo sapiens GN=PMPCB PE=1 SV=2	PMPCB		54 kDa		unknown	1.0101	0	0
262	TRUE	Empty	N-acylneuraminate cytidylyltransferase OS=Homo sapiens GN=CMAS PE=1 SV=2	CMAS		48 kDa		unknown	0	0.9901	0
122	TRUE	Empty	NAD(P) transhydrogenase, mitochondrial OS=Homo sapiens GN=NNT PE=1 SV=3	NNT		114 kDa		unknown	1.0101	0.9901	0
65	TRUE	Empty	NADH dehydrogenase [ubiquinone] iron-sulfur protein 8, mitochondrial OS=Homo sapiens GN=NDUFS8 PE=1 SV=1	NDUFS8		?		unknown	4.0404	2.9703	0
163	TRUE	Empty	Nuclear fragile X mental retardation-interacting protein 2 OS=Homo sapiens GN=NUFIP2 PE=1 SV=1	NUFIP2		76 kDa		unknown	0	1.9802	0
130	TRUE	Empty	Nucleolin OS=Homo sapiens GN=NCL PE=1 SV=3	NCL		77 kDa		unknown	0	1.9802	0
14	TRUE	Empty	Peptidyl-prolyl cis-trans isomerase B OS=Homo sapiens GN=PPIB PE=1 SV=2	PPIB		24 kDa		unknown	13.131	19.802	0
108	TRUE	Empty	Peptidyl-prolyl cis-trans isomerase H OS=Homo sapiens GN=PPIH PE=1 SV=1	PPIH		19 kDa		unknown	1.0101	0.9901	0
238	TRUE	Empty	Peroxiredoxin-1 OS=Homo sapiens GN=PRDX1 PE=1 SV=1	PRDX1		?	TRUE	unknown	1.0101	0	0
146	TRUE	Empty	Polymerase delta-interacting protein 2 OS=Homo sapiens GN=POLDIP2 PE=1 SV=1	POLDIP2		?		unknown	0	0.9901	0
199	TRUE	Empty	Pre-mRNA-processing factor 19 OS=Homo sapiens GN=PRPF19 PE=1 SV=1	PRPF19		55 kDa		unknown	0	0.9901	0
33	TRUE	Empty	Probable ATP-dependent RNA helicase DDX6 OS=Homo sapiens GN=DDX6 PE=1 SV=2	DDX6		54 kDa		unknown	5.0505	4.9505	0
66	TRUE	Empty	Prohibitin OS=Homo sapiens GN=PHB PE=1 SV=1	PHB		30 kDa		unknown	5.0505	3.9604	0
159	TRUE	Empty	Proline-rich protein PRCC OS=Homo sapiens GN=PRCC PE=1 SV=1	PRCC		52 kDa		unknown	1.0101	0	0
31	TRUE	Empty	Prolyl 3-hydroxylase 1 OS=Homo sapiens GN=P3H1 PE=1 SV=2	P3H1		83 kDa		unknown	5.0505	9.901	0
271	TRUE	Empty	Protein disulfide-isomerase A3 OS=Homo sapiens GN=PDIA3 PE=1 SV=4	PDIA3		?		unknown	0	0.9901	0
154	TRUE	Empty	Puromycin-sensitive aminopeptidase OS=Homo sapiens GN=NPEPPS PE=1 SV=2	NPEPPS		103 kDa		unknown	2.0202	0.9901	0
226	TRUE	Empty	Ras GTPase-activating protein-binding protein 1 OS=Homo sapiens GN=G3BP1 PE=1 SV=1	G3BP1		52 kDa		unknown	0	1.9802	0
175	TRUE	Empty	RNA-binding protein EWS OS=Homo sapiens GN=EWSR1 PE=1 SV=1	EWSR1		68 kDa		unknown	0	0.9901	0
177	TRUE	Empty	Single-stranded DNA-binding protein, mitochondrial OS=Homo sapiens GN=SSBP1 PE=1 SV=1	SSBP1		17 kDa		unknown	1.0101	0.9901	0
35	TRUE	Empty	Succinate dehydrogenase [ubiquinone] flavoprotein subunit, mitochondrial OS=Homo sapiens GN=SDHA PE=1 SV=2	SDHA		73 kDa		unknown	6.0606	3.9604	0
112	TRUE	Empty	Succinyl-CoA:3-ketoacid coenzyme A transferase 1, mitochondrial OS=Homo sapiens GN=OXCT1 PE=1 SV=1	OXCT1		?		unknown	1.0101	0.9901	0
10	TRUE	Empty	SWISS-PROT:P00761|TRYP_PIG Trypsin - Sus scrofa (Pig).	SWISS-PROT:P00761|TRYP_PIG Trypsin - Sus scrofa (Pig).		?		unknown	24.242	11.881	0
11	TRUE	Empty	SWISS-PROT:P02769 (Bos taurus) Bovine serum albumin precursor	SWISS-PROT:P02769 (Bos taurus) Bovine serum albumin precursor		?	TRUE	unknown	12.121	23.762	0
69	TRUE	Empty	SWISS-PROT:P12763 (Bos taurus) Alpha-2-HS-glycoprotein precursor	SWISS-PROT:P12763 (Bos taurus) Alpha-2-HS-glycoprotein precursor		?		unknown	4.0404	0.9901	0
247	TRUE	Empty	THO complex subunit 4 OS=Homo sapiens GN=ALYREF PE=1 SV=3	ALYREF		?		unknown	0	0.9901	0
138	TRUE	Empty	Transitional endoplasmic reticulum ATPase OS=Homo sapiens GN=VCP PE=1 SV=4	VCP		89 kDa		unknown	2.0202	0	0
218	TRUE	Empty	Transmembrane protein 14C OS=Homo sapiens GN=TMEM14C PE=1 SV=1	TMEM14C		?		unknown	1.0101	0	0
259	TRUE	Empty	tRNA-splicing ligase RtcB homolog OS=Homo sapiens GN=RTCB PE=1 SV=1	RTCB		55 kDa		unknown	0	0.9901	0
249	TRUE	Empty	U6 snRNA-associated Sm-like protein LSm8 OS=Homo sapiens GN=LSM8 PE=1 SV=3	LSM8		10 kDa		unknown	1.0101	0	0
156	TRUE	Empty	Ubiquinone biosynthesis protein COQ9, mitochondrial OS=Homo sapiens GN=COQ9 PE=1 SV=1	COQ9		36 kDa		unknown	2.0202	0	0
22	TRUE	Empty	Voltage-dependent anion-selective channel protein 1 OS=Homo sapiens GN=VDAC1 PE=1 SV=2	VDAC1		?		unknown	14.141	8.9109	0
121	TRUE	Empty	WD repeat-containing protein 5 OS=Homo sapiens GN=WDR5 PE=1 SV=1	WDR5		37 kDa		unknown	2.0202	0.9901	0
167	TRUE	Empty	X-ray repair cross-complementing protein 5 OS=Homo sapiens GN=XRCC5 PE=1 SV=3	XRCC5		83 kDa		unknown	0	1.9802	0
107	TRUE	Empty	X-ray repair cross-complementing protein 6 OS=Homo sapiens GN=XRCC6 PE=1 SV=2	XRCC6		70 kDa		unknown	0	0.9901	0
1	TRUE	Empty	Cluster of Keratin, type II cytoskeletal 1 OS=Homo sapiens GN=KRT1 PE=1 SV=6 (K2C1_HUMAN)	KRT1		66 kDa	TRUE	unknown	144.44	132.67	0
1.7	TRUE	Empty	TREMBL:Q9H552 Tax_Id=9606 Gene_Symbol=- Keratin-8-like protein 1	TREMBL:Q9H552 Tax_Id=9606 Gene_Symbol=- Keratin-8-like protein 1		?	TRUE	unknown	0	0.9901	0
1.8	TRUE	Empty	Keratin, type II cytoskeletal 4 OS=Homo sapiens GN=KRT4 PE=1 SV=4	KRT4		57 kDa	TRUE	unknown	4.0404	6.9307	0
1.11	TRUE	Empty	Keratin, type II cytoskeletal 2 oral OS=Homo sapiens GN=KRT76 PE=1 SV=2	KRT76		66 kDa	TRUE	unknown	5.0505	0	0
1.13	TRUE	Empty	Isoform 2 of Keratin, type II cytoskeletal 72 OS=Homo sapiens GN=KRT72	KRT72		56 kDa	TRUE	unknown	0	1.9802	0
1.14	TRUE	Empty	SWISS-PROT:P07744 Tax_Id=10090 Gene_Symbol=Krt4 Keratin, type II cytoskeletal 4	SWISS-PROT:P07744 Tax_Id=10090 Gene_Symbol=Krt4 Keratin, type II cytoskeletal 4		?	TRUE	unknown	1.0101	0	0
1.15	TRUE	Empty	SWISS-PROT:P02538 Tax_Id=9606 Gene_Symbol=KRT6A Keratin, type II cytoskeletal 6A	SWISS-PROT:P02538 Tax_Id=9606 Gene_Symbol=KRT6A Keratin, type II cytoskeletal 6A		?	TRUE	unknown	15.151	0	0
1.16	TRUE	Empty	SWISS-PROT:P04259 Tax_Id=9606 Gene_Symbol=KRT6B Keratin, type II cytoskeletal 6B	SWISS-PROT:P04259 Tax_Id=9606 Gene_Symbol=KRT6B Keratin, type II cytoskeletal 6B		?	TRUE	unknown	21.212	0	0
1.21	TRUE	Empty	Isoform 2 of Peripherin OS=Homo sapiens GN=PRPH	PRPH		54 kDa	TRUE	unknown	0	0.9901	0
1.22	TRUE	Empty	Tax_Id=9606 Gene_Symbol=- Similar to Keratin, type II cytoskeletal 8	Tax_Id=9606 Gene_Symbol=- Similar to Keratin, type II cytoskeletal 8		?	TRUE	unknown	2.0202	0	0
1.24	TRUE	Empty	Keratin, type II cuticular Hb2 OS=Homo sapiens GN=KRT82 PE=1 SV=3	KRT82		57 kDa	TRUE	unknown	0	1.9802	0
1.25	TRUE	Empty	TREMBL:Q6IME9 Tax_Id=10090 Gene_Symbol=Krt72 Type-II keratin Kb35	TREMBL:Q6IME9 Tax_Id=10090 Gene_Symbol=Krt72 Type-II keratin Kb35		?	TRUE	unknown	1.0101	0	0
1.26	TRUE	Empty	Isoform 2 of Keratin, type II cytoskeletal 8 OS=Homo sapiens GN=KRT8	KRT8		57 kDa	TRUE	unknown	0	0	0
1.27	TRUE	Empty	SWISS-PROT:Q5XQN5 (Bos taurus) Keratin, type II cytoskeletal 5	SWISS-PROT:Q5XQN5 (Bos taurus) Keratin, type II cytoskeletal 5		?	TRUE	unknown	0	0	0
2	TRUE	Empty	Cluster of Actin, alpha cardiac muscle 1 OS=Homo sapiens GN=ACTC1 PE=1 SV=1 (ACTC_HUMAN)	ACTC1		42 kDa	TRUE	unknown	63.636	54.456	0
2.3	TRUE	Empty	Actin, alpha skeletal muscle OS=Homo sapiens GN=ACTA1 PE=1 SV=1	ACTA1		42 kDa	TRUE	unknown	32.323	27.723	0
2.6	TRUE	Empty	POTE ankyrin domain family member E OS=Homo sapiens GN=POTEE PE=2 SV=3	POTEE		?	TRUE	unknown	3.0303	0	0
2.7	TRUE	Empty	Isoform 2 of Actin, gamma-enteric smooth muscle OS=Homo sapiens GN=ACTG2	ACTG2		37 kDa	TRUE	unknown	0	0	0
3	TRUE	Empty	Cluster of Myosin-6 OS=Homo sapiens GN=MYH6 PE=1 SV=5 (MYH6_HUMAN)	MYH6		224 kDa	TRUE	unknown	49.495	26.733	0
3.1	TRUE	Empty	Myosin-6 OS=Homo sapiens GN=MYH6 PE=1 SV=5	MYH6		224 kDa	TRUE	unknown	48.485	26.733	0
3.2	TRUE	Empty	Myosin-4 OS=Homo sapiens GN=MYH4 PE=2 SV=2	MYH4		223 kDa	TRUE	unknown	2.0202	0.9901	0
3.3	TRUE	Empty	Myosin-7 OS=Homo sapiens GN=MYH7 PE=1 SV=5	MYH7		223 kDa	TRUE	unknown	17.172	6.9307	0
3.4	TRUE	Empty	Myosin-3 OS=Homo sapiens GN=MYH3 PE=1 SV=3	MYH3		224 kDa	TRUE	unknown	2.0202	0	0
3.5	TRUE	Empty	Myosin-8 OS=Homo sapiens GN=MYH8 PE=1 SV=3	MYH8		223 kDa	TRUE	unknown	1.0101	0	0
3.6	TRUE	Empty	Myosin-13 OS=Homo sapiens GN=MYH13 PE=2 SV=2	MYH13		224 kDa	TRUE	unknown	0	0.9901	0
5	TRUE	Empty	Cluster of Heat shock cognate 71 kDa protein OS=Homo sapiens GN=HSPA8 PE=1 SV=1 (sp|P11142|HSP7C_HUMANHeat shock cognate 71 kDa protein OS=Homo sapiens GN=HSPA8 PE=1 SV=1)	HSPA8		?	TRUE	unknown	69.697	85.149	0
5.1	TRUE	Empty	Heat shock cognate 71 kDa protein OS=Homo sapiens GN=HSPA8 PE=1 SV=1	HSPA8		?	TRUE	unknown	41.414	0	0
5.2	TRUE	Empty	Isoform 2 of Heat shock cognate 71 kDa protein OS=Homo sapiens GN=HSPA8	HSPA8		54 kDa	TRUE	unknown	38.384	55.446	0
5.3	TRUE	Empty	Heat shock 70 kDa protein 1A OS=Homo sapiens GN=HSPA1A PE=1 SV=1	HSPA1A		?	TRUE	unknown	36.363	0	0
5.4	TRUE	Empty	Isoform 2 of Heat shock 70 kDa protein 1A OS=Homo sapiens GN=HSPA1A	HSPA1A		64 kDa	TRUE	unknown	31.313	43.565	0
5.6	TRUE	Empty	Heat shock 70 kDa protein 1-like OS=Homo sapiens GN=HSPA1L PE=1 SV=2	HSPA1L		?	TRUE	unknown	19.192	0	0
5.7	TRUE	Empty	Heat shock-related 70 kDa protein 2 OS=Homo sapiens GN=HSPA2 PE=1 SV=1	HSPA2		?	TRUE	unknown	23.232	0	0
5.8	TRUE	Empty	Heat shock 70 kDa protein 6 OS=Homo sapiens GN=HSPA6 PE=1 SV=2	HSPA6		?	TRUE	unknown	17.172	0	0
6	TRUE	Empty	ADP/ATP translocase 3 OS=Homo sapiens GN=SLC25A6 PE=1 SV=4	SLC25A6		33 kDa	TRUE	unknown	78.788	59.406	0
7.3	TRUE	Empty	TREMBL:Q148H6 (Bos taurus) Hypothetical protein MGC139876	TREMBL:Q148H6 (Bos taurus) Hypothetical protein MGC139876		?	TRUE	unknown	4.0404	2.9703	0
7.12	TRUE	Empty	Isoform 3 of Keratin, type I cytoskeletal 13 OS=Homo sapiens GN=KRT13	KRT13		46 kDa	TRUE	unknown	12.121	7.9208	0
7.15	TRUE	Empty	SWISS-PROT:Q7Z3Y7 Tax_Id=9606 Gene_Symbol=KRT28 Keratin 25D	SWISS-PROT:Q7Z3Y7 Tax_Id=9606 Gene_Symbol=KRT28 Keratin 25D		?	TRUE	unknown	5.0505	0	0
7.16	TRUE	Empty	SWISS-PROT:Q7Z3Y9 Tax_Id=9606 Gene_Symbol=KRT26 Keratin, type I cytoskeletal 26	SWISS-PROT:Q7Z3Y9 Tax_Id=9606 Gene_Symbol=KRT26 Keratin, type I cytoskeletal 26		?	TRUE	unknown	1.0101	0	0
9	TRUE	Empty	Isoform 12 of Titin OS=Homo sapiens GN=TTN	TTN		3994 kDa		unknown	18.182	5.9406	0
13	TRUE	Empty	Isoform 2 of ATP synthase F(0) complex subunit C2, mitochondrial OS=Homo sapiens GN=ATP5G2	ATP5G2		21 kDa		unknown	23.232	25.743	0
16	TRUE	Empty	Isoform 3 of ATP synthase subunit alpha, mitochondrial OS=Homo sapiens GN=ATP5A1	ATP5A1		58 kDa		unknown	23.232	10.891	0
17	TRUE	Empty	Desmoplakin OS=Homo sapiens GN=DSP PE=1 SV=3	DSP		332 kDa		unknown	10.101	5.9406	0
19	TRUE	Empty	Isoform 2 of Sarcoplasmic/endoplasmic reticulum calcium ATPase 2 OS=Homo sapiens GN=ATP2A2	ATP2A2		110 kDa		unknown	15.151	7.9208	0
23	TRUE	Empty	Cluster of Isoform 2 of Alpha-actinin-2 OS=Homo sapiens GN=ACTN2 (ACTN2_HUMAN)	ACTN2		104 kDa	TRUE	unknown	14.141	9.901	0
24	TRUE	Empty	Creatine kinase S-type, mitochondrial OS=Homo sapiens GN=CKMT2 PE=1 SV=2	CKMT2		48 kDa		unknown	10.101	7.9208	0
29	TRUE	Empty	Cluster of Isoform 2 of Polyadenylate-binding protein 1 OS=Homo sapiens GN=PABPC1 (sp|P11940-2|PABP1_HUMAN)	PABPC1		61 kDa	TRUE	unknown	3.0303	11.881	0
29.1	TRUE	Empty	Isoform 2 of Polyadenylate-binding protein 1 OS=Homo sapiens GN=PABPC1	PABPC1		61 kDa	TRUE	unknown	3.0303	9.901	0
29.3	TRUE	Empty	Isoform 2 of Polyadenylate-binding protein 1-like OS=Homo sapiens GN=PABPC1L	PABPC1L		38 kDa	TRUE	unknown	0	0.9901	0
32	TRUE	Empty	Cluster of Isoform 3 of E3 ubiquitin-protein ligase TRIM11 OS=Homo sapiens GN=TRIM11 (sp|Q96F44-3|TRI11_HUMAN)	TRIM11		53 kDa	TRUE	unknown	4.0404	10.891	0
32.1	TRUE	Empty	Isoform 3 of E3 ubiquitin-protein ligase TRIM11 OS=Homo sapiens GN=TRIM11	TRIM11		53 kDa	TRUE	unknown	4.0404	10.891	0
32.2	TRUE	Empty	Butyrophilin subfamily 1 member A1 OS=Homo sapiens GN=BTN1A1 PE=1 SV=3	BTN1A1		59 kDa	TRUE	unknown	0	0.9901	0
36	TRUE	Empty	Cluster of Isoform 2 of Beta-enolase OS=Homo sapiens GN=ENO3 (sp|P13929-2|ENOB_HUMAN)	ENO3		44 kDa	TRUE	unknown	5.0505	3.9604	0
36.1	TRUE	Empty	Isoform 2 of Beta-enolase OS=Homo sapiens GN=ENO3	ENO3		44 kDa	TRUE	unknown	5.0505	3.9604	0
39	TRUE	Empty	Isoform 3 of Heterogeneous nuclear ribonucleoprotein K OS=Homo sapiens GN=HNRNPK	HNRNPK		49 kDa		unknown	5.0505	7.9208	0
41	TRUE	Empty	Cluster of 78 kDa glucose-regulated protein OS=Homo sapiens GN=HSPA5 PE=1 SV=2 (sp|P11021|GRP78_HUMAN78 kDa glucose-regulated protein OS=Homo sapiens GN=HSPA5 PE=1 SV=2)	HSPA5		?	TRUE	unknown	38.384	39.604	0
41.1	TRUE	Empty	78 kDa glucose-regulated protein OS=Homo sapiens GN=HSPA5 PE=1 SV=2	HSPA5		?	TRUE	unknown	38.384	0	0
42	TRUE	Empty	Isoform 2 of NADH-ubiquinone oxidoreductase 75 kDa subunit, mitochondrial OS=Homo sapiens GN=NDUFS1	NDUFS1		81 kDa		unknown	4.0404	5.9406	0
43	TRUE	Empty	Keratinocyte proline-rich protein OS=Homo sapiens GN=KPRP PE=1 SV=1	KPRP		64 kDa		unknown	5.0505	2.9703	0
46	TRUE	Empty	Cluster of Glycogen phosphorylase, muscle form OS=Homo sapiens GN=PYGM PE=1 SV=6 (sp|P11217|PYGM_HUMAN)	PYGM		97 kDa	TRUE	unknown	7.0707	4.9505	0
46.1	TRUE	Empty	Glycogen phosphorylase, muscle form OS=Homo sapiens GN=PYGM PE=1 SV=6	PYGM		97 kDa	TRUE	unknown	7.0707	4.9505	0
47	TRUE	Empty	Isoform M1 of Pyruvate kinase PKM OS=Homo sapiens GN=PKM	PKM		58 kDa		unknown	6.0606	2.9703	0
48	TRUE	Empty	Desmoglein-1 OS=Homo sapiens GN=DSG1 PE=1 SV=2	DSG1		114 kDa		unknown	5.0505	4.9505	0
49	TRUE	Empty	Cluster of Isoform 2 of Spliceosome RNA helicase DDX39B OS=Homo sapiens GN=DDX39B (sp|Q13838-2|DX39B_HUMAN)	DDX39B		51 kDa	TRUE	unknown	3.0303	3.9604	0
49.2	TRUE	Empty	Isoform 2 of ATP-dependent RNA helicase DDX39A OS=Homo sapiens GN=DDX39A	DDX39A		37 kDa	TRUE	unknown	0	0	0
50	TRUE	Empty	Isoform 2 of Aspartate aminotransferase, mitochondrial OS=Homo sapiens GN=GOT2	GOT2		43 kDa		unknown	5.0505	5.9406	0
51	TRUE	Empty	Cluster of Isoform 3 of NEDD4-like E3 ubiquitin-protein ligase WWP1 OS=Homo sapiens GN=WWP1 (sp|Q9H0M0-3|WWP1_HUMAN)	WWP1		92 kDa	TRUE	unknown	3.0303	4.9505	0
51.1	TRUE	Empty	Isoform 3 of NEDD4-like E3 ubiquitin-protein ligase WWP1 OS=Homo sapiens GN=WWP1	WWP1		92 kDa	TRUE	unknown	3.0303	4.9505	0
51.2	TRUE	Empty	Isoform 2 of E3 ubiquitin-protein ligase Itchy homolog OS=Homo sapiens GN=ITCH	ITCH		99 kDa	TRUE	unknown	1.0101	0.9901	0
51.3	TRUE	Empty	Isoform 2 of NEDD4-like E3 ubiquitin-protein ligase WWP2 OS=Homo sapiens GN=WWP2	WWP2		86 kDa	TRUE	unknown	0	1.9802	0
52	TRUE	Empty	Alpha-crystallin B chain OS=Homo sapiens GN=CRYAB PE=1 SV=2	CRYAB		?		unknown	6.0606	4.9505	0
55	TRUE	Empty	Malate dehydrogenase, cytoplasmic OS=Homo sapiens GN=MDH1 PE=1 SV=4	MDH1		36 kDa		unknown	6.0606	3.9604	0
56	TRUE	Empty	Cluster of ADP/ATP translocase 1 OS=Homo sapiens GN=SLC25A4 PE=1 SV=4 (ADT1_HUMAN)	SLC25A4		33 kDa	TRUE	unknown	36.363	17.822	0
58	TRUE	Empty	Cluster of Protein argonaute-2 OS=Homo sapiens GN=AGO2 PE=1 SV=3 (sp|Q9UKV8|AGO2_HUMAN)	AGO2		97 kDa	TRUE	unknown	1.0101	0.9901	0
58.1	TRUE	Empty	Protein argonaute-2 OS=Homo sapiens GN=AGO2 PE=1 SV=3	AGO2		97 kDa	TRUE	unknown	1.0101	0.9901	0
58.2	TRUE	Empty	Protein argonaute-1 OS=Homo sapiens GN=AGO1 PE=1 SV=3	AGO1		97 kDa	TRUE	unknown	1.0101	0.9901	0
58.3	TRUE	Empty	Protein argonaute-3 OS=Homo sapiens GN=AGO3 PE=1 SV=2	AGO3		97 kDa	TRUE	unknown	1.0101	0.9901	0
61	TRUE	Empty	Cluster of (Bos taurus) similar to alpha-tubulin I isoform 1 (ENSEMBL:ENSBTAP00000016242)	Cluster of (Bos taurus) similar to alpha-tubulin I isoform 1 (ENSEMBL:ENSBTAP00000016242)		?	TRUE	unknown	3.0303	2.9703	0
61.1	TRUE	Empty	(Bos taurus) similar to alpha-tubulin I isoform 1	(Bos taurus) similar to alpha-tubulin I isoform 1		?	TRUE	unknown	3.0303	2.9703	0
61.2	TRUE	Empty	Putative tubulin-like protein alpha-4B OS=Homo sapiens GN=TUBA4B PE=5 SV=2	TUBA4B		?	TRUE	unknown	0	0	0
67	TRUE	Empty	Cluster of Stress-70 protein, mitochondrial OS=Homo sapiens GN=HSPA9 PE=1 SV=2 (sp|P38646|GRP75_HUMANStress-70 protein, mitochondrial OS=Homo sapiens GN=HSPA9 PE=1 SV=2)	HSPA9		?	TRUE	unknown	37.374	34.654	0
67.1	TRUE	Empty	Stress-70 protein, mitochondrial OS=Homo sapiens GN=HSPA9 PE=1 SV=2	HSPA9		?	TRUE	unknown	37.374	0	0
72	TRUE	Empty	Isoform 2 of Dynein heavy chain 17, axonemal OS=Homo sapiens GN=DNAH17	DNAH17		508 kDa		unknown	1.0101	0	0
74	TRUE	Empty	Isoform 2 of Keratin, type II cytoskeletal 78 OS=Homo sapiens GN=KRT78	KRT78		45 kDa	TRUE	unknown	6.0606	2.9703	0
75	TRUE	Empty	Isoform 2 of Ryanodine receptor 2 OS=Homo sapiens GN=RYR2	RYR2		565 kDa	TRUE	unknown	4.0404	0	0
76	TRUE	Empty	Isoform 3 of Long-chain-fatty-acid--CoA ligase 1 OS=Homo sapiens GN=ACSL1	ACSL1		78 kDa	TRUE	unknown	2.0202	1.9802	0
77	TRUE	Empty	Isoform 2 of Eukaryotic translation initiation factor 5A-1 OS=Homo sapiens GN=EIF5A	EIF5A		20 kDa		unknown	3.0303	2.9703	0
80	TRUE	Empty	Calcium-binding mitochondrial carrier protein Aralar1 OS=Homo sapiens GN=SLC25A12 PE=1 SV=2	SLC25A12		75 kDa		unknown	3.0303	0.9901	0
81	TRUE	Empty	Isoform 2 of Myomesin-1 OS=Homo sapiens GN=MYOM1	MYOM1		178 kDa		unknown	3.0303	0.9901	0
82	TRUE	Empty	Ubiquitin-60S ribosomal protein L40 OS=Homo sapiens GN=UBA52 PE=1 SV=2	UBA52		15 kDa		unknown	1.0101	0	0
83	TRUE	Empty	Isoform MLC3 of Myosin light chain 1/3, skeletal muscle isoform OS=Homo sapiens GN=MYL1	MYL1		17 kDa		unknown	1.0101	1.9802	0
84	TRUE	Empty	Myoglobin OS=Homo sapiens GN=MB PE=1 SV=2	MB		17 kDa		unknown	4.0404	1.9802	0
90	TRUE	Empty	Heat shock protein HSP 90-beta OS=Homo sapiens GN=HSP90AB1 PE=1 SV=4	HSP90AB1		?	TRUE	unknown	3.0303	2.9703	0
91	TRUE	Empty	Prolactin-inducible protein OS=Homo sapiens GN=PIP PE=1 SV=1	PIP		17 kDa		unknown	2.0202	0.9901	0
94	TRUE	Empty	Isoform Beta of Heat shock protein 105 kDa OS=Homo sapiens GN=HSPH1	HSPH1		92 kDa	TRUE	unknown	1.0101	0	0
95	TRUE	Empty	SWISS-PROT:Q5D862 Tax_Id=9606 Gene_Symbol=FLG2 Filaggrin-2	SWISS-PROT:Q5D862 Tax_Id=9606 Gene_Symbol=FLG2 Filaggrin-2		?		unknown	1.0101	0.9901	0
97	TRUE	Empty	Cluster of DnaJ homolog subfamily C member 8 OS=Homo sapiens GN=DNAJC8 PE=1 SV=2 (sp|O75937|DNJC8_HUMANDnaJ homolog subfamily C member 8 OS=Homo sapiens GN=DNAJC8 PE=1 SV=2)	DNAJC8		?	TRUE	unknown	4.0404	5.9406	0
97.1	TRUE	Empty	DnaJ homolog subfamily C member 8 OS=Homo sapiens GN=DNAJC8 PE=1 SV=2	DNAJC8		?	TRUE	unknown	4.0404	0	0
105	TRUE	Empty	Isoform 2 of Protein SEC13 homolog OS=Homo sapiens GN=SEC13	SEC13		34 kDa		unknown	0	1.9802	0
106	TRUE	Empty	Isoform 2 of Electron transfer flavoprotein subunit alpha, mitochondrial OS=Homo sapiens GN=ETFA	ETFA		30 kDa		unknown	1.0101	1.9802	0
109	TRUE	Empty	Triosephosphate isomerase OS=Homo sapiens GN=TPI1 PE=1 SV=3	TPI1		31 kDa		unknown	0	0.9901	0
110	TRUE	Empty	Serum albumin OS=Homo sapiens GN=ALB PE=1 SV=2	ALB		69 kDa	TRUE	unknown	3.0303	3.9604	0
111	TRUE	Empty	Dynein light chain 1, cytoplasmic OS=Homo sapiens GN=DYNLL1 PE=1 SV=1	DYNLL1		10 kDa		unknown	1.0101	0.9901	0
113	TRUE	Empty	Isoform 2 of 26S proteasome non-ATPase regulatory subunit 2 OS=Homo sapiens GN=PSMD2	PSMD2		82 kDa		unknown	0	0.9901	0
114	TRUE	Empty	Cluster of Isoform 2 of Probable ATP-dependent RNA helicase DDX17 OS=Homo sapiens GN=DDX17 (sp|Q92841-1|DDX17_HUMAN)	DDX17		72 kDa	TRUE	unknown	1.0101	1.9802	0
114.1	TRUE	Empty	Isoform 2 of Probable ATP-dependent RNA helicase DDX17 OS=Homo sapiens GN=DDX17	DDX17		72 kDa	TRUE	unknown	1.0101	1.9802	0
114.2	TRUE	Empty	Isoform 2 of Probable ATP-dependent RNA helicase DDX5 OS=Homo sapiens GN=DDX5	DDX5		61 kDa	TRUE	unknown	1.0101	0.9901	0
119	TRUE	Empty	Isoform 1B of Desmocollin-1 OS=Homo sapiens GN=DSC1	DSC1		94 kDa		unknown	3.0303	0.9901	0
120	TRUE	Empty	Isoform 3 of Apoptosis-inducing factor 1, mitochondrial OS=Homo sapiens GN=AIFM1	AIFM1		66 kDa		unknown	1.0101	1.9802	0
123	TRUE	Empty	Protein-glutamine gamma-glutamyltransferase E OS=Homo sapiens GN=TGM3 PE=1 SV=4	TGM3		77 kDa		unknown	1.0101	0.9901	0
124	TRUE	Empty	Isoform 2 of Polyadenylate-binding protein 2 OS=Homo sapiens GN=PABPN1	PABPN1		31 kDa		unknown	1.0101	0.9901	0
125	TRUE	Empty	Cluster of Isoform 2 of Heterogeneous nuclear ribonucleoprotein L OS=Homo sapiens GN=HNRNPL (sp|P14866-2|HNRPL_HUMAN)	HNRNPL		51 kDa	TRUE	unknown	0	0.9901	0
125.1	TRUE	Empty	Isoform 2 of Heterogeneous nuclear ribonucleoprotein L OS=Homo sapiens GN=HNRNPL	HNRNPL		51 kDa	TRUE	unknown	0	0	0
125.2	TRUE	Empty	Heterogeneous nuclear ribonucleoprotein L OS=Homo sapiens GN=HNRNPL PE=1 SV=2	HNRNPL		64 kDa	TRUE	unknown	0	0.9901	0
126.2	TRUE	Empty	Peroxiredoxin-2 OS=Homo sapiens GN=PRDX2 PE=1 SV=5	PRDX2		22 kDa	TRUE	unknown	0	0.9901	0
128	TRUE	Empty	Calmodulin-1 OS=Homo sapiens GN=CALM1 PE=1 SV=1	CALM1		?		unknown	0	1.9802	0
131	TRUE	Empty	Isoform 2 of UTP--glucose-1-phosphate uridylyltransferase OS=Homo sapiens GN=UGP2	UGP2		56 kDa		unknown	2.0202	0.9901	0
132	TRUE	Empty	Desmin OS=Homo sapiens GN=DES PE=1 SV=3	DES		54 kDa	TRUE	unknown	3.0303	0	0
133	TRUE	Empty	Trimeric intracellular cation channel type A OS=Homo sapiens GN=TMEM38A PE=1 SV=1	TMEM38A		?		unknown	3.0303	0	0
134	TRUE	Empty	Isoform 2 of cAMP-dependent protein kinase catalytic subunit alpha OS=Homo sapiens GN=PRKACA	PRKACA		40 kDa		unknown	2.0202	1.9802	0
135	TRUE	Empty	Creatine kinase M-type OS=Homo sapiens GN=CKM PE=1 SV=2	CKM		43 kDa		unknown	2.0202	0.9901	0
139	TRUE	Empty	Succinyl-CoA:3-ketoacid coenzyme A transferase 2, mitochondrial OS=Homo sapiens GN=OXCT2 PE=2 SV=2	OXCT2		?		unknown	3.0303	0	0
140	TRUE	Empty	Isoform 2 of Protein arginine N-methyltransferase 1 OS=Homo sapiens GN=PRMT1	PRMT1		40 kDa		unknown	0	0.9901	0
144	TRUE	Empty	Myosin regulatory light chain 10 OS=Homo sapiens GN=MYL10 PE=2 SV=2	MYL10		?		unknown	3.0303	0.9901	0
145	TRUE	Empty	Isoform 2 of 40S ribosomal protein S3 OS=Homo sapiens GN=RPS3	RPS3		28 kDa		unknown	0	0.9901	0
148	TRUE	Empty	SWISS-PROT:P02754 Beta-lactoglobulin - Bos taurus (Bovine).	SWISS-PROT:P02754 Beta-lactoglobulin - Bos taurus (Bovine).		?		unknown	0	0.9901	0
149	TRUE	Empty	Sodium/potassium-transporting ATPase subunit alpha-2 OS=Homo sapiens GN=ATP1A2 PE=1 SV=1	ATP1A2		?		unknown	1.0101	0.9901	0
150	TRUE	Empty	Glycogen debranching enzyme OS=Homo sapiens GN=AGL PE=1 SV=3	AGL		175 kDa		unknown	1.0101	0.9901	0
153	TRUE	Empty	Isoform 2 of Isocitrate dehydrogenase [NADP], mitochondrial OS=Homo sapiens GN=IDH2	IDH2		45 kDa		unknown	2.0202	1.9802	0
155	TRUE	Empty	Isoform 2 of Prohibitin-2 OS=Homo sapiens GN=PHB2	PHB2		29 kDa		unknown	1.0101	0.9901	0
157	TRUE	Empty	Isoform 2 of Thioredoxin-dependent peroxide reductase, mitochondrial OS=Homo sapiens GN=PRDX3	PRDX3		26 kDa		unknown	0	0.9901	0
158	TRUE	Empty	Isoform 2 of Poly(rC)-binding protein 2 OS=Homo sapiens GN=PCBP2	PCBP2		39 kDa		unknown	1.0101	0	0
160	TRUE	Empty	Isoform 2 of Phosphoglucomutase-1 OS=Homo sapiens GN=PGM1	PGM1		64 kDa		unknown	3.0303	0	0
165	TRUE	Empty	Isoform 2 of Fructose-bisphosphate aldolase A OS=Homo sapiens GN=ALDOA	ALDOA		45 kDa		unknown	1.0101	0.9901	0
166	TRUE	Empty	Isoform SV of 14-3-3 protein epsilon OS=Homo sapiens GN=YWHAE	YWHAE		27 kDa	TRUE	unknown	1.0101	0.9901	0
168	TRUE	Empty	Isoform 3 of Methionine aminopeptidase 2 OS=Homo sapiens GN=METAP2	METAP2		50 kDa		unknown	0	0.9901	0
170	TRUE	Empty	Isoform 2 of Phosphoglycerate kinase 1 OS=Homo sapiens GN=PGK1	PGK1		41 kDa		unknown	1.0101	0	0
171	TRUE	Empty	Elongation factor 1-alpha 1 OS=Homo sapiens GN=EEF1A1 PE=1 SV=1	EEF1A1		?		unknown	1.0101	0.9901	0
172	TRUE	Empty	Isoform 2 of Importin-5 OS=Homo sapiens GN=IPO5	IPO5		117 kDa		unknown	0	0.9901	0
173	TRUE	Empty	Propionyl-CoA carboxylase beta chain, mitochondrial OS=Homo sapiens GN=PCCB PE=1 SV=3	PCCB		58 kDa		unknown	1.0101	0.9901	0
174	TRUE	Empty	Isoform 2 of Calsequestrin-2 OS=Homo sapiens GN=CASQ2	CASQ2		38 kDa		unknown	1.0101	0	0
176	TRUE	Empty	Isoform 2 of Annexin A2 OS=Homo sapiens GN=ANXA2	ANXA2		40 kDa		unknown	1.0101	0.9901	0
178	TRUE	Empty	Isoform 2 of Polyadenylate-binding protein-interacting protein 1 OS=Homo sapiens GN=PAIP1	PAIP1		46 kDa		unknown	0	0.9901	0
180	TRUE	Empty	Isoform 2 of Delta-1-pyrroline-5-carboxylate dehydrogenase, mitochondrial OS=Homo sapiens GN=ALDH4A1	ALDH4A1		55 kDa		unknown	1.0101	1.9802	0
184	TRUE	Empty	Filaggrin OS=Homo sapiens GN=FLG PE=1 SV=3	FLG		435 kDa		unknown	1.0101	0	0
185	TRUE	Empty	Isoform 1 of Glycerol kinase OS=Homo sapiens GN=GK	GK		57 kDa		unknown	1.0101	0.9901	0
187	TRUE	Empty	Isoform 2 of Tropomyosin alpha-3 chain OS=Homo sapiens GN=TPM3	TPM3		29 kDa		unknown	1.0101	0	0
188	TRUE	Empty	Isoform Heart of ATP synthase subunit gamma, mitochondrial OS=Homo sapiens GN=ATP5C1	ATP5C1		33 kDa		unknown	1.0101	0	0
193	TRUE	Empty	Troponin I, cardiac muscle OS=Homo sapiens GN=TNNI3 PE=1 SV=3	TNNI3		?		unknown	1.0101	0	0
197	TRUE	Empty	Caprin-1 OS=Homo sapiens GN=CAPRIN1 PE=1 SV=2	CAPRIN1		?		unknown	0	0.9901	0
201	TRUE	Empty	Peptidyl-prolyl cis-trans isomerase A OS=Homo sapiens GN=PPIA PE=1 SV=2	PPIA		18 kDa		unknown	1.0101	0.9901	0
202	TRUE	Empty	Isoform 3 of Ubiquitin-conjugating enzyme E2 L3 OS=Homo sapiens GN=UBE2L3	UBE2L3		24 kDa		unknown	1.0101	0.9901	0
203	TRUE	Empty	Zinc-alpha-2-glycoprotein OS=Homo sapiens GN=AZGP1 PE=1 SV=2	AZGP1		34 kDa		unknown	0	0.9901	0
204	TRUE	Empty	Isoform 2 of Elongation factor 1-gamma OS=Homo sapiens GN=EEF1G	EEF1G		56 kDa		unknown	1.0101	0.9901	0
205	TRUE	Empty	Isoform 2 of Proteasome subunit alpha type-6 OS=Homo sapiens GN=PSMA6	PSMA6		25 kDa		unknown	1.0101	0.9901	0
206	TRUE	Empty	Isoform 3 of Echinoderm microtubule-associated protein-like 1 OS=Homo sapiens GN=EML1	EML1		92 kDa		unknown	1.0101	0	0
207	TRUE	Empty	Isoform 2 of Serine beta-lactamase-like protein LACTB, mitochondrial OS=Homo sapiens GN=LACTB	LACTB		41 kDa		unknown	1.0101	0	0
208	TRUE	Empty	Isoform 2 of Acyl-protein thioesterase 1 OS=Homo sapiens GN=LYPLA1	LYPLA1		23 kDa		unknown	1.0101	0	0
209	TRUE	Empty	Solute carrier family 40 member 1 OS=Homo sapiens GN=SLC40A1 PE=1 SV=1	SLC40A1		63 kDa		unknown	1.0101	0.9901	0
210	TRUE	Empty	Cullin-associated NEDD8-dissociated protein 2 OS=Homo sapiens GN=CAND2 PE=1 SV=3	CAND2		?		unknown	1.0101	0.9901	0
211	TRUE	Empty	Isoform 2 of Gamma-glutamylcyclotransferase OS=Homo sapiens GN=GGCT	GGCT		13 kDa		unknown	1.0101	0	0
215	TRUE	Empty	Isoform 2 of Sarcalumenin OS=Homo sapiens GN=SRL	SRL		54 kDa		unknown	1.0101	0.9901	0
216	TRUE	Empty	Isoform 2 of 3-hydroxyacyl-CoA dehydrogenase type-2 OS=Homo sapiens GN=HSD17B10	HSD17B10		26 kDa		unknown	1.0101	0	0
217	TRUE	Empty	Isoform 2 of T-complex protein 1 subunit eta OS=Homo sapiens GN=CCT7	CCT7		37 kDa		unknown	1.0101	0	0
220	TRUE	Empty	Protein-cysteine N-palmitoyltransferase HHAT-like protein OS=Homo sapiens GN=HHATL PE=2 SV=1	HHATL		?		unknown	2.0202	0	0
221	TRUE	Empty	Nebulette OS=Homo sapiens GN=NEBL PE=1 SV=1	NEBL		116 kDa		unknown	1.0101	0	0
222	TRUE	Empty	NADP-dependent malic enzyme, mitochondrial OS=Homo sapiens GN=ME3 PE=2 SV=2	ME3		67 kDa		unknown	1.0101	0	0
224	TRUE	Empty	Bromodomain-containing protein 4 OS=Homo sapiens GN=BRD4 PE=1 SV=2	BRD4		152 kDa		unknown	1.0101	0	0
225	TRUE	Empty	Isoform A of Isocitrate dehydrogenase [NAD] subunit beta, mitochondrial OS=Homo sapiens GN=IDH3B	IDH3B		42 kDa		unknown	1.0101	0	0
227	TRUE	Empty	Isoform 2 of Eukaryotic initiation factor 4A-II OS=Homo sapiens GN=EIF4A2	EIF4A2		46 kDa		unknown	1.0101	0	0
233	TRUE	Empty	Isoform 2 of Mitochondrial fission regulator 1-like OS=Homo sapiens GN=MTFR1L	MTFR1L		23 kDa		unknown	1.0101	0.9901	0
234	TRUE	Empty	Isoform 2 of Protein KRBA1 OS=Homo sapiens GN=KRBA1	KRBA1		107 kDa		unknown	1.0101	0	0
236	TRUE	Empty	Isoform 2 of T-complex protein 1 subunit zeta OS=Homo sapiens GN=CCT6A	CCT6A		53 kDa		unknown	1.0101	0.9901	0
239	TRUE	Empty	Skin-specific protein 32 OS=Homo sapiens GN=XP32 PE=1 SV=1	XP32		26 kDa		unknown	1.0101	0.9901	0
240	TRUE	Empty	Isoform 2 of von Willebrand factor D and EGF domain-containing protein OS=Homo sapiens GN=VWDE	VWDE		116 kDa		unknown	1.0101	0	0
244	TRUE	Empty	Isoform 2 of Thioredoxin OS=Homo sapiens GN=TXN	TXN		9 kDa		unknown	0	0.9901	0
245	TRUE	Empty	Isoform 2 of Bifunctional purine biosynthesis protein PURH OS=Homo sapiens GN=ATIC	ATIC		65 kDa		unknown	0	0.9901	0
246	TRUE	Empty	Isoform 2 of 60S ribosomal protein L15 OS=Homo sapiens GN=RPL15	RPL15		17 kDa		unknown	0	0.9901	0
251	TRUE	Empty	Short-chain specific acyl-CoA dehydrogenase, mitochondrial OS=Homo sapiens GN=ACADS PE=1 SV=1	ACADS		?		unknown	1.0101	0	0
253	TRUE	Empty	Isoform 2 of T-complex protein 1 subunit beta OS=Homo sapiens GN=CCT2	CCT2		53 kDa		unknown	1.0101	0	0
254	TRUE	Empty	Histone H2A type 2-C OS=Homo sapiens GN=HIST2H2AC PE=1 SV=4	HIST2H2AC		?		unknown	1.0101	0	0
257	TRUE	Empty	Isoform 2 of Proteasome subunit alpha type-7 OS=Homo sapiens GN=PSMA7	PSMA7		20 kDa	TRUE	unknown	1.0101	0	0
264	TRUE	Empty	Calmodulin-like protein 5 OS=Homo sapiens GN=CALML5 PE=1 SV=2	CALML5		?		unknown	1.0101	0	0
265	TRUE	Empty	Lipocalin-1 OS=Homo sapiens GN=LCN1 PE=1 SV=1	LCN1		19 kDa		unknown	0	0.9901	0
267	TRUE	Empty	Isoform 2 of 60S ribosomal protein L31 OS=Homo sapiens GN=RPL31	RPL31		15 kDa		unknown	0	0.9901	0
269	TRUE	Empty	Isoform Short of 14-3-3 protein beta/alpha OS=Homo sapiens GN=YWHAB	YWHAB		28 kDa		unknown	0	0.9901	0
270	TRUE	Empty	Laminin subunit alpha-1 OS=Homo sapiens GN=LAMA1 PE=1 SV=2	LAMA1		?		unknown	0	0.9901	0
