# Supplementary material for: A novel DNAJ protein, TCAIM, drives proteolysis of α-ketoglutarate dehydrogenase and regulates mitochondrial metabolism.
Source: Research Square preprint supplement (doi:10.21203/rs.3.rs-1236697/v1), 2022-01-21
Supplement: Supplementary file 3 [file c645ce634abd8a83b92b66dc.docx]

**Table3 CryoEM data collection, refinement and validation statistics**

| **Data collection and processing** |  |
| --- | --- |
| Magnification | ×105, 000 |
| Voltage (kV ) | 300 |
| Electron exposure (e-/Å²) | 60 |
| Defocus range (um) | -1 - -2 |
| Pixel size (Å) | 0.855 |
| Symmetry imposed | *C*1 |
| Initial particle images (no.) | 1, 792, 631 |
| Final particle images (no.) | 1,342, 786 |
| Map resolution (Å) | 2.86 |
| FSC threshold | 0.143 |
| Map resolution range (Å) | 3.5 |
| Map sharpening *B* factors (Å²) | -132.6 |
|  |  |
| **Refinement** |  |
| Initial map used(PDB code) | 2jgd |
| Model resolution (Å) | 3.2 |
| FSC threshold | 0.5 |
| Composition |  |
| Chains | 6 |
| Atoms | 16533(Hydrogens: 0) |
| Residues | Protein: 2052 Nucleotide: 0 |
| Water | 0 |
| Ligands | CA: 1 |
|  | MG: 2 |
|  | TPP: 2 |
| *B* factors (Å²) min/max/mean | |
| Protein | 18.80/118.30/55.71 |
| Ligand | 31.96/61.69/39.04 |
| Bonds (RMSD) | |
| Length (Å) | 0.009 |
| Angles (°) | 1.072 |
| Validation |  |
| MolProbity score | 1.71 |
| Clash score | 5.97 |
| Rotamer outliers (%) | 0.22 |
| Cβ outliers (%) | 0 |
| Ramachandran plot (%) | |
| Outliers | 0.05 |
| Allowed | 5.53 |
| Favored | 94.42 |
